# Supplementary material for: Artificial fingerprints for cross-comparison of forensic DNA and protein recovery methods
Source: PLoS One. 2019 Oct 3;14(10):e0223170. doi: 10.1371/journal.pone.0223170 (PMC6776342; doi:10.1371/journal.pone.0223170)
Supplement: S1 Table — (XLSX) [file pone.0223170.s001.xlsx]

## Sheet: psms
filename	SampleNumber	SampleType	confidence	search_engine	identifying_node	search_id	identifying_node_no	psm_ambiguity	peptide_seq	annotated_sequence	modifications	protein_grp_cnt	protein_cnt	protein_id_master	protein_id	description	missed_cleavages	charge	precursor_charge_original	delta_score	deltaCn	sequest_rank	sequest_search_engine_rank	sequest_concatenated_rank	precursor_mz	precursor_mass_MH	peptide_mass_MH	mass_error_ppm	mass_error_mz	matched_ions	total_ions	precursorIntensity	dissociation_method	ms_order	isolation_interference_percent	injection_time_ms	retention_time_min	scan_num_first	scan_num_last	precursor_acq_num	ions_matched	annotation	xcorr	peptides_matched	percolator_qvalue	percolator_pep	percolator_svmscore
1904247_Proteos_005.RAW	AF-M	Artificial Fingerprint	High	Sequest HT	Sequest HT (A2)	A	2	Unambiguous	GGSGGGGGGSSGGR	GGSGGGGGGSSGGR		1	1	P04264	P04264	Keratin, type II cytoskeletal 1 OS=Homo sapiens OX=9606 GN=KRT1 PE=1 SV=6	0	2	2	0.6421	0	1	1	1	503.718	1006.43	1006.43	-1.03	-0.00052	0	0	442053	HCD	MS2	29.4692	50	12.9124	2124	2124	2120	0/0		2.85	818	0.0007241	0.006105	0.455
1904247_Proteos_005.RAW	AF-M	Artificial Fingerprint	High	Sequest HT	Sequest HT (A2)	A	2	Unambiguous	HGSSSGSSSR	HGSSSGSSSR		1	1	Q86YZ3	Q86YZ3	Hornerin OS=Homo sapiens OX=9606 GN=HRNR PE=1 SV=2	0	2	2	0.5685	0	1	1	1	474.71	948.413	948.413	-0.27	-0.00013	0	0	542433	HCD	MS2	16.5435	50	13.3893	2239	2239	2238	0/0		2.48	757	0.002625	0.0571	0.117
1904247_Proteos_005.RAW	AF-M	Artificial Fingerprint	High	Sequest HT	Sequest HT (A2)	A	2	Unambiguous	RHESSSEK	RHESSSEK		1	1	P20930	P20930	Filaggrin OS=Homo sapiens OX=9606 GN=FLG PE=1 SV=3	1	2	2	0.3077	0	1	1	1	480.231	959.454	959.454	0.24	0.00012	0	0	424617	HCD	MS2	11.3319	50	13.8416	2356	2356	2353	0/0		2.99	791	0.001797	0.03876	0.176
1904247_Proteos_005.RAW	AF-M	Artificial Fingerprint	High	Sequest HT	Sequest HT (A2)	A	2	Unambiguous	HGSGSGHSSSHGQHGSGSGR	HGSGSGHSSSHGQHGSGSGR		1	1	Q86YZ3	Q86YZ3	Hornerin OS=Homo sapiens OX=9606 GN=HRNR PE=1 SV=2	0	4	4	0.4396	0	1	1	1	465.702	1859.79	1859.79	0.13	6e-05	0	0	1.05916e+06	HCD	MS2	8.53737	50	14.0279	2443	2443	2442	0/0		3.89	3656	0	0.0007645	0.767
1904247_Proteos_005.RAW	AF-M	Artificial Fingerprint	High	Sequest HT	Sequest HT (A2)	A	2	Unambiguous	HGSGSGHSSSHGQHGSGSGR	HGSGSGHSSSHGQHGSGSGR		1	1	Q86YZ3	Q86YZ3	Hornerin OS=Homo sapiens OX=9606 GN=HRNR PE=1 SV=2	0	2	2	0.6451	0	1	1	1	930.397	1859.79	1859.79	-0.12	-0.00011	0	0	864236	HCD	MS2	0	50	14.0293	2444	2444	2442	0/0		6.48	3654	0	3.078e-07	1.942
1904247_Proteos_005.RAW	AF-M	Artificial Fingerprint	High	Sequest HT	Sequest HT (A2)	A	2	Unambiguous	HGSGSGHSSSHGQHGSGSGR	HGSGSGHSSSHGQHGSGSGR		1	1	Q86YZ3	Q86YZ3	Hornerin OS=Homo sapiens OX=9606 GN=HRNR PE=1 SV=2	0	3	3	0.6621	0	1	1	1	620.601	1859.79	1859.79	0.07	4e-05	0	0	1.69067e+06	HCD	MS2	3.04031	50	14.0306	2445	2445	2442	0/0		6.6	3656	0	3.91e-06	1.56
1904247_Proteos_005.RAW	AF-M	Artificial Fingerprint	High	Sequest HT	Sequest HT (A2)	A	2	Unambiguous	EKNKTENTR	EKnKTENTR	N3(Deamidated)	1	1	P20930	P20930	Filaggrin OS=Homo sapiens OX=9606 GN=FLG PE=1 SV=3	2	2	2	0.2611	0	1	1	1	560.785	1120.56	1120.56	2.47	0.00138	0	0	96504.1	HCD	MS2	59.3424	50	14.1226	2493	2493	2491	0/0		2.03	1126	0.0007241	0.02206	0.262
1904247_Proteos_005.RAW	AF-M	Artificial Fingerprint	High	Sequest HT	Sequest HT (A2)	A	2	Unambiguous	GRHGSGSGHSSSHGQHGSGSGR	GRHGSGSGHSSSHGQHGSGSGR		1	1	Q86YZ3	Q86YZ3	Hornerin OS=Homo sapiens OX=9606 GN=HRNR PE=1 SV=2	1	3	3	0.5633	0	1	1	1	691.641	2072.91	2072.91	-0.59	-0.00041	0	0	1.11666e+06	HCD	MS2	0	50	14.1537	2507	2507	2504	0/0		6.48	5323	0	0.0001294	1.034
1904247_Proteos_005.RAW	AF-M	Artificial Fingerprint	High	Sequest HT	Sequest HT (A2)	A	2	Unambiguous	GRHGSGSGHSSSHGQHGSGSGR	GRHGSGSGHSSSHGQHGSGSGR		1	1	Q86YZ3	Q86YZ3	Hornerin OS=Homo sapiens OX=9606 GN=HRNR PE=1 SV=2	1	4	4	0.4466	0	1	1	1	518.983	2072.91	2072.91	0.29	0.00015	0	0	828743	HCD	MS2	23.1508	50	14.1551	2508	2508	2504	0/0		3.56	5308	0.0007241	0.01922	0.282
1904247_Proteos_005.RAW	AF-M	Artificial Fingerprint	High	Sequest HT	Sequest HT (A2)	A	2	Unambiguous	GRHGSGSGHSSSHGQHGSGSGR	GRHGSGSGHSSSHGQHGSGSGR		1	1	Q86YZ3	Q86YZ3	Hornerin OS=Homo sapiens OX=9606 GN=HRNR PE=1 SV=2	1	5	5	0.4286	0	1	1	1	415.388	2072.91	2072.91	-0.4	-0.00017	0	0	544209	HCD	MS2	4.75213	50	14.1564	2509	2509	2504	0/0		4.06	5312	0.0007241	0.007528	0.423
1904247_Proteos_005.RAW	AF-M	Artificial Fingerprint	High	Sequest HT	Sequest HT (A2)	A	2	Unambiguous	GRHGSGSGHSSSHGQHGSGSGR	GRHGSGSGHSSSHGQHGSGSGR		1	1	Q86YZ3	Q86YZ3	Hornerin OS=Homo sapiens OX=9606 GN=HRNR PE=1 SV=2	1	2	2	0.6949	0	1	1	1	1036.96	2072.91	2072.91	-0.47	-0.00048	0	0	276220	HCD	MS2	0	50	14.1578	2510	2510	2504	0/0		5.67	5320	0	0.0002417	0.94
1904247_Proteos_005.RAW	AF-M	Artificial Fingerprint	High	Sequest HT	Sequest HT (A2)	A	2	Unambiguous	SGHSGSHHSHTTSQGR	SGHSGSHHSHTTSQGR		1	1	P20930	P20930	Filaggrin OS=Homo sapiens OX=9606 GN=FLG PE=1 SV=3	0	2	2	0.5793	0	1	1	1	830.37	1659.73	1659.73	0.16	0.00013	0	0	152594	HCD	MS2	0	50	14.274	2551	2551	2549	0/0		3.97	3031	0	0.0002872	0.914
1904247_Proteos_005.RAW	AF-M	Artificial Fingerprint	High	Sequest HT	Sequest HT (A2)	A	2	Unambiguous	SGHSGSHHSHTTSQGR	SGHSGSHHSHTTSQGR		1	1	P20930	P20930	Filaggrin OS=Homo sapiens OX=9606 GN=FLG PE=1 SV=3	0	3	3	0.4344	0	1	1	1	553.916	1659.73	1659.73	-0.07	-4e-05	0	0	290974	HCD	MS2	6.1588	50	14.2754	2552	2552	2549	0/0		3.43	3059	0.0007241	0.00659	0.443
1904247_Proteos_005.RAW	AF-M	Artificial Fingerprint	High	Sequest HT	Sequest HT (A2)	A	2	Unambiguous	SGHSGSHHSHTTSQGR	SGHSGSHHSHTTSQGR		1	1	P20930	P20930	Filaggrin OS=Homo sapiens OX=9606 GN=FLG PE=1 SV=3	0	4	4	0.3564	0	1	1	1	415.689	1659.73	1659.73	0.14	6e-05	0	0	860970	HCD	MS2	24.9183	50	14.2874	2558	2558	2555	0/0		2.75	3031	0.0007241	0.01588	0.311
1904247_Proteos_005.RAW	AF-M	Artificial Fingerprint	High	Sequest HT	Sequest HT (A2)	A	2	Unambiguous	HGSGSGQSPGHGQR	HGSGSGQSPGHGQR		1	1	Q86YZ3	Q86YZ3	Hornerin OS=Homo sapiens OX=9606 GN=HRNR PE=1 SV=2	0	3	3	0.5016	0	1	1	1	450.208	1348.61	1348.61	-0.06	-3e-05	0	0	560369	HCD	MS2	3.30559	50	14.4694	2630	2630	2629	0/0		3.05	2046	0	0.002482	0.59
1904247_Proteos_005.RAW	AF-M	Artificial Fingerprint	High	Sequest HT	Sequest HT (A2)	A	2	Unambiguous	HGSGSGQSPGHGQR	HGSGSGQSPGHGQR		1	1	Q86YZ3	Q86YZ3	Hornerin OS=Homo sapiens OX=9606 GN=HRNR PE=1 SV=2	0	2	2	0.533	0	1	1	1	674.809	1348.61	1348.61	-0.05	-3e-05	0	0	359314	HCD	MS2	0	50	14.4708	2631	2631	2629	0/0		3.94	2046	0	8.299e-05	1.101
1904247_Proteos_005.RAW	AF-M	Artificial Fingerprint	High	Sequest HT	Sequest HT (A2)	A	2	Unambiguous	SSGGSSSVK	SSGGSSSVK		1	1	P04264	P04264	Keratin, type II cytoskeletal 1 OS=Homo sapiens OX=9606 GN=KRT1 PE=1 SV=6	0	2	2	0.4187	0	1	1	1	398.196	795.384	795.384	-0.26	-0.0001	0	0	442498	HCD	MS2	14.6523	50	14.5168	2660	2660	2656	0/0		2.03	668	0.0007241	0.01465	0.323
1904247_Proteos_005.RAW	AF-M	Artificial Fingerprint	High	Sequest HT	Sequest HT (A2)	A	2	Unambiguous	QGSGSGQSPSR	qGSGSGQSPSR	Q1(Deamidated)	1	1	Q86YZ3	Q86YZ3	Hornerin OS=Homo sapiens OX=9606 GN=HRNR PE=1 SV=2	0	2	2	0.0856	0	1	1	1	524.736	1048.46	1048.47	-0.71	-0.00037	0	0	149220	HCD	MS2	18.4792	50	14.5181	2661	2661	2656	0/0		1.87	938	0.0007241	0.02263	0.258
1904247_Proteos_005.RAW	AF-M	Artificial Fingerprint	High	Sequest HT	Sequest HT (A2)	A	2	Unambiguous	KQVQTSQK	KQVQTSQK		1	1	P15924	P15924	Desmoplakin OS=Homo sapiens OX=9606 GN=DSP PE=1 SV=3	1	2	2	0.3626	0	1	1	1	473.769	946.531	946.532	-0.21	-0.0001	0	0	936980	HCD	MS2	14.3032	50	14.5272	2665	2665	2662	0/0		2.73	750	0.001797	0.03421	0.195
1904247_Proteos_005.RAW	AF-M	Artificial Fingerprint	High	Sequest HT	Sequest HT (A2)	A	2	Unambiguous	GRHGSGSGQSPGHGQR	GRHGSGSGQSPGHGQR		1	1	Q86YZ3	Q86YZ3	Hornerin OS=Homo sapiens OX=9606 GN=HRNR PE=1 SV=2	1	3	3	0.4217	0	1	1	1	521.249	1561.73	1561.73	0.25	0.00013	0	0	560608	HCD	MS2	15.5572	50	14.5285	2666	2666	2662	0/0		4.34	2774	0	0.0004572	0.844
1904247_Proteos_005.RAW	AF-M	Artificial Fingerprint	High	Sequest HT	Sequest HT (A2)	A	2	Unambiguous	GRHGSGSGQSPGHGQR	GRHGSGSGQSPGHGQR		1	1	Q86YZ3	Q86YZ3	Hornerin OS=Homo sapiens OX=9606 GN=HRNR PE=1 SV=2	1	2	2	0.5825	0	1	1	1	781.369	1561.73	1561.73	-0.83	-0.00065	0	0	252937	HCD	MS2	17.2839	50	14.5298	2667	2667	2662	0/0		3.88	2684	0	7.991e-05	1.107
1904247_Proteos_005.RAW	AF-M	Artificial Fingerprint	High	Sequest HT	Sequest HT (A2)	A	2	Unambiguous	QGSGSGQSPSR	QGSGSGQSPSR		1	1	Q86YZ3	Q86YZ3	Hornerin OS=Homo sapiens OX=9606 GN=HRNR PE=1 SV=2	0	2	2	0.4823	0	1	1	1	524.244	1047.48	1047.48	0.11	6e-05	0	0	281251	HCD	MS2	40.226	50	14.5456	2676	2676	2670	0/0		3.11	914	0	0.003236	0.55
1904247_Proteos_005.RAW	AF-M	Artificial Fingerprint	High	Sequest HT	Sequest HT (A2)	A	2	Unambiguous	GRHGSGSGQSPGHGQR	GRHGSGSGQSPGHGQR		1	1	Q86YZ3	Q86YZ3	Hornerin OS=Homo sapiens OX=9606 GN=HRNR PE=1 SV=2	1	4	4	0.5279	0	1	1	1	391.189	1561.73	1561.73	0.17	6e-05	0	0	2.98676e+06	HCD	MS2	17.7732	25.852	14.5572	2682	2682	2679	0/0		3.58	2753	0.0007241	0.009249	0.392
1904247_Proteos_005.RAW	AF-M	Artificial Fingerprint	High	Sequest HT	Sequest HT (A2)	A	2	Unambiguous	HSQSGQGQSTQTGSR	HSQSGQGQSTQTGSR		1	1	Q5D862	Q5D862	Filaggrin-2 OS=Homo sapiens OX=9606 GN=FLG2 PE=1 SV=1	0	2	2	0.5738	0	1	1	1	773.354	1545.7	1545.7	-0.02	-2e-05	0	0	134438	HCD	MS2	0	50	14.5703	2689	2689	2687	0/0		2.44	2675	0.001797	0.03966	0.173
1904247_Proteos_005.RAW	AF-M	Artificial Fingerprint	High	Sequest HT	Sequest HT (A2)	A	2	Unambiguous	GQHSSGSGQSPGHGQR	GQHSSGSGQSPGHGQR		1	1	Q86YZ3	Q86YZ3	Hornerin OS=Homo sapiens OX=9606 GN=HRNR PE=1 SV=2	0	3	3	0.4571	0	1	1	1	521.904	1563.7	1563.7	-1.98	-0.00103	0	0	2724519	HCD	MS2	39.7353	22.65	14.5715	2690	2690	2687	0/0		4.66	2841	0	2.447e-05	1.284
1904247_Proteos_005.RAW	AF-M	Artificial Fingerprint	High	Sequest HT	Sequest HT (A2)	A	2	Unambiguous	GQHSSGSGQSPGHGQR	GQHSSGSGQSPGHGQR		1	1	Q86YZ3	Q86YZ3	Hornerin OS=Homo sapiens OX=9606 GN=HRNR PE=1 SV=2	0	2	2	0.5697	0	1	1	1	782.352	1563.7	1563.7	-2.79	-0.00218	0	0	1.7506e+06	HCD	MS2	20.4745	50	14.5728	2691	2691	2687	0/0		4.23	2819	0	0.0001065	1.063
1904247_Proteos_005.RAW	AF-M	Artificial Fingerprint	High	Sequest HT	Sequest HT (A2)	A	2	Unambiguous	GQHSSGSGQSPGHGQR	GQHSSGSGQSPGHGQR		1	1	Q86YZ3	Q86YZ3	Hornerin OS=Homo sapiens OX=9606 GN=HRNR PE=1 SV=2	0	4	4	0.3033	0	1	1	1	391.681	1563.7	1563.7	-0.31	-0.00012	0	0	3.31139e+06	HCD	MS2	25.9401	25.598	14.5923	2703	2703	2700	0/0		2.11	2665	0.0007241	0.01404	0.33
1904247_Proteos_005.RAW	AF-M	Artificial Fingerprint	High	Sequest HT	Sequest HT (A2)	A	2	Unambiguous	HGNSHQGEPR	HGNSHQGEPR		1	1	P13645	P13645	Keratin, type I cytoskeletal 10 OS=Homo sapiens OX=9606 GN=KRT10 PE=1 SV=6	0	2	2	0.5769	0	1	1	1	559.758	1118.51	1118.51	-0.11	-6e-05	0	0	394388	HCD	MS2	6.74374	50	14.639	2726	2726	2724	0/0		3.9	1306	0	0.0007165	0.777
1904247_Proteos_005.RAW	AF-M	Artificial Fingerprint	High	Sequest HT	Sequest HT (A2)	A	2	Unambiguous	KHGGPKDEER	KHGGPKDEER		1	1	P00441	P00441	Superoxide dismutase [Cu-Zn] OS=Homo sapiens OX=9606 GN=SOD1 PE=1 SV=2	2	3	3	0.4098	0	1	1	1	384.863	1152.58	1152.58	0.04	2e-05	0	0	323494	HCD	MS2	41.7875	50	14.6403	2727	2727	2724	0/0		1.83	1268	0.002625	0.06351	0.101
1904247_Proteos_005.RAW	AF-M	Artificial Fingerprint	High	Sequest HT	Sequest HT (A2)	A	2	Unambiguous	QGSGSGQSPGHGQR	QGSGSGQSPGHGQR		1	1	Q86YZ3	Q86YZ3	Hornerin OS=Homo sapiens OX=9606 GN=HRNR PE=1 SV=2	0	3	3	0.4232	0	1	1	1	447.208	1339.61	1339.61	-0.36	-0.00016	0	0	616126	HCD	MS2	20.0922	50	14.6457	2731	2731	2724	0/0		3.71	1936	0.0007241	0.01195	0.354
1904247_Proteos_005.RAW	AF-M	Artificial Fingerprint	High	Sequest HT	Sequest HT (A2)	A	2	Unambiguous	QGSGSGQSPGHGQR	QGSGSGQSPGHGQR		1	1	Q86YZ3	Q86YZ3	Hornerin OS=Homo sapiens OX=9606 GN=HRNR PE=1 SV=2	0	2	2	0.4452	0	1	1	1	670.307	1339.61	1339.61	-1.62	-0.00109	0	0	11115403	HCD	MS2	0.16806	11.436	14.6599	2739	2739	2736	0/0		4.2	1923	0	0.001695	0.648
1904247_Proteos_005.RAW	AF-M	Artificial Fingerprint	High	Sequest HT	Sequest HT (A2)	A	2	Unambiguous	YGQHGSGSR	YGQHGSGSR		1	1	Q86YZ3	Q86YZ3	Hornerin OS=Homo sapiens OX=9606 GN=HRNR PE=1 SV=2	0	2	2	0.44	0	1	1	1	474.718	948.428	948.428	0.25	0.00012	0	0	47800544	HCD	MS2	0.216237	5.261	14.8732	2839	2839	2836	0/0		2.25	801	0.002625	0.0595	0.111
1904247_Proteos_005.RAW	AF-M	Artificial Fingerprint	High	Sequest HT	Sequest HT (A2)	A	2	Unambiguous	SDASHGQSGPR	SDASHGQSGPR		1	1	P20930	P20930	Filaggrin OS=Homo sapiens OX=9606 GN=FLG PE=1 SV=3	0	2	2	0.3676	0	1	1	1	549.75	1098.49	1098.49	-0.37	-0.0002	0	0	107949	HCD	MS2	0	50	14.9447	2879	2879	2873	0/0		2.04	1280	0.0007241	0.02422	0.248
1904247_Proteos_005.RAW	AF-M	Artificial Fingerprint	High	Sequest HT	Sequest HT (A2)	A	2	Unambiguous	HGSSSGSSSHYGQHGSGSR	HGSSSGSSSHYGQHGSGSR		1	1	Q86YZ3	Q86YZ3	Hornerin OS=Homo sapiens OX=9606 GN=HRNR PE=1 SV=2	0	4	4	0.5727	0	1	1	1	465.451	1858.78	1858.78	0.14	6e-05	0	0	2.76599e+06	HCD	MS2	5.14105	50	14.9668	2890	2890	2889	0/0		4.4	3686	0	0.0001729	0.991
1904247_Proteos_005.RAW	AF-M	Artificial Fingerprint	High	Sequest HT	Sequest HT (A2)	A	2	Unambiguous	HGSSSGSSSHYGQHGSGSR	HGSSSGSSSHYGQHGSGSR		1	1	Q86YZ3	Q86YZ3	Hornerin OS=Homo sapiens OX=9606 GN=HRNR PE=1 SV=2	0	3	3	0.488	0	1	1	1	620.265	1858.78	1858.78	-0.05	-3e-05	0	0	2.74913e+06	HCD	MS2	0	50	14.9695	2892	2892	2889	0/0		5.43	3699	0	4.649e-07	1.88
1904247_Proteos_005.RAW	AF-M	Artificial Fingerprint	High	Sequest HT	Sequest HT (A2)	A	2	Unambiguous	QGSHHEQSVNR	QGSHHEQSVNR		1	1	P20930	P20930	Filaggrin OS=Homo sapiens OX=9606 GN=FLG PE=1 SV=3	0	3	3	0.2009	0	1	1	1	426.869	1278.59	1278.59	-0.05	-2e-05	0	0	1050640	HCD	MS2	10.951	50	14.9708	2893	2893	2889	0/0		2.34	1548	0.0007241	0.02523	0.241
1904247_Proteos_005.RAW	AF-M	Artificial Fingerprint	High	Sequest HT	Sequest HT (A2)	A	2	Unambiguous	HGSGLGHSSSHGQHGSGSGR	HGSGLGHSSSHGQHGSGSGR		1	1	Q86YZ3	Q86YZ3	Hornerin OS=Homo sapiens OX=9606 GN=HRNR PE=1 SV=2	0	2	2	0.6283	0	1	1	1	943.423	1885.84	1885.84	-0.33	-0.00031	0	0	1.2865e+06	HCD	MS2	0	50	15.0231	2927	2927	2921	0/0		6.08	4473	0	5.875e-07	1.845
1904247_Proteos_005.RAW	AF-M	Artificial Fingerprint	High	Sequest HT	Sequest HT (A2)	A	2	Unambiguous	HGSGLGHSSSHGQHGSGSGR	HGSGLGHSSSHGQHGSGSGR		1	1	Q86YZ3	Q86YZ3	Hornerin OS=Homo sapiens OX=9606 GN=HRNR PE=1 SV=2	0	4	4	0.3668	0	1	1	1	472.216	1885.84	1885.84	0.69	0.00033	0	0	18765870	HCD	MS2	3.46491	5.541	15.044	2940	2940	2937	0/0		3.19	4522	0.0007241	0.01538	0.316
1904247_Proteos_005.RAW	AF-M	Artificial Fingerprint	High	Sequest HT	Sequest HT (A2)	A	2	Unambiguous	HGSGLGHSSSHGQHGSGSGR	HGSGLGHSSSHGQHGSGSGR		1	1	Q86YZ3	Q86YZ3	Hornerin OS=Homo sapiens OX=9606 GN=HRNR PE=1 SV=2	0	5	5	0.3832	0	1	1	1	377.974	1885.84	1885.84	0.41	0.00015	0	0	9281378	HCD	MS2	0.993934	9.858	15.0452	2941	2941	2937	0/0		2.74	4489	0	0.001978	0.624
1904247_Proteos_005.RAW	AF-M	Artificial Fingerprint	High	Sequest HT	Sequest HT (A2)	A	2	Unambiguous	GRHGSGLGHSSSHGQHGSGSGR	GRHGSGLGHSSSHGQHGSGSGR		1	1	Q86YZ3	Q86YZ3	Hornerin OS=Homo sapiens OX=9606 GN=HRNR PE=1 SV=2	1	5	5	0.5093	0	1	1	1	420.598	2098.96	2098.96	-0.37	-0.00015	0	0	219082	HCD	MS2	20.5538	50	15.0755	2961	2961	2953	0/0		4.32	6071	0	0.001304	0.687
1904247_Proteos_005.RAW	AF-M	Artificial Fingerprint	High	Sequest HT	Sequest HT (A2)	A	2	Unambiguous	GRHGSGLGHSSSHGQHGSGSGR	GRHGSGLGHSSSHGQHGSGSGR		1	1	Q86YZ3	Q86YZ3	Hornerin OS=Homo sapiens OX=9606 GN=HRNR PE=1 SV=2	1	3	3	0.64	0	1	1	1	700.326	2098.96	2098.96	-0.13	-9e-05	0	0	1.0674e+06	HCD	MS2	0.496709	50	15.0951	2973	2973	2969	0/0		6	6077	0	9.597e-06	1.425
1904247_Proteos_005.RAW	AF-M	Artificial Fingerprint	High	Sequest HT	Sequest HT (A2)	A	2	Unambiguous	GRHGSGLGHSSSHGQHGSGSGR	GRHGSGLGHSSSHGQHGSGSGR		1	1	Q86YZ3	Q86YZ3	Hornerin OS=Homo sapiens OX=9606 GN=HRNR PE=1 SV=2	1	4	4	0.4946	0	1	1	1	525.496	2098.96	2098.96	0.03	2e-05	0	0	869443	HCD	MS2	3.97068	50	15.1504	3006	3006	3004	0/0		3.68	6082	0.001797	0.03133	0.209
1904247_Proteos_005.RAW	AF-M	Artificial Fingerprint	High	Sequest HT	Sequest HT (A2)	A	2	Unambiguous	KNHEEEMK	KNHEEEMK		1	6	P13645	Q7Z3Y7; Q2M2I5; P13645; P19012; P13646; Q7Z3Y8	Keratin, type I cytoskeletal 28 OS=Homo sapiens OX=9606 GN=KRT28 PE=1 SV=2; Keratin, type I cytoskeletal 24 OS=Homo sapiens OX=9606 GN=KRT24 PE=1 SV=1; Keratin, type I cytoskeletal 10 OS=Homo sapiens OX=9606 GN=KRT10 PE=1 SV=6; Keratin, type I cytoskeletal 15 OS=Homo sapiens OX=9606 GN=KRT15 PE=1 SV=3; Keratin, type I cytoskeletal 13 OS=Homo sapiens OX=9606 GN=KRT13 PE=1 SV=4; Keratin, type I cyt…	1	2	2	0.2314	0	1	1	1	522.743	1044.48	1044.48	0.55	0.00029	0	0	1.18941e+06	HCD	MS2	13.5755	50	15.1688	3017	3017	3014	0/0		3.5	944	0.0007241	0.007345	0.427
1904247_Proteos_005.RAW	AF-M	Artificial Fingerprint	High	Sequest HT	Sequest HT (A2)	A	2	Unambiguous	HGSSSGSSSSYGQHGSGSR	HGSSSGSSSSYGQHGSGSR		1	1	Q86YZ3	Q86YZ3	Hornerin OS=Homo sapiens OX=9606 GN=HRNR PE=1 SV=2	0	2	2	0.7065	0	1	1	1	904.881	1808.76	1808.75	0.44	0.0004	0	0	76851.1	HCD	MS2	0	50	15.1715	3019	3019	3014	0/0		2.93	3525	0	0.002378	0.597
1904247_Proteos_005.RAW	AF-M	Artificial Fingerprint	High	Sequest HT	Sequest HT (A2)	A	2	Unambiguous	HGSSSGSSSSYGQHGSGSR	HGSSSGSSSSYGQHGSGSR		1	1	Q86YZ3	Q86YZ3	Hornerin OS=Homo sapiens OX=9606 GN=HRNR PE=1 SV=2	0	3	3	0.4316	0	1	1	1	603.589	1808.75	1808.75	-0.31	-0.00019	0	0	500771	HCD	MS2	24.8211	50	15.1845	3026	3026	3022	0/0		3.8	3437	0	0.001914	0.629
1904247_Proteos_005.RAW	AF-M	Artificial Fingerprint	High	Sequest HT	Sequest HT (A2)	A	2	Unambiguous	SSSSGSVGESSSK	SSSSGSVGESSSK		1	1	P13645	P13645	Keratin, type I cytoskeletal 10 OS=Homo sapiens OX=9606 GN=KRT10 PE=1 SV=6	0	2	2	0.5056	0	1	1	1	593.266	1185.52	1185.52	1.47	0.00087	0	0	937582	HCD	MS2	12.9472	50	15.2754	3080	3080	3077	0/0		2.69	1609	0.0007241	0.004154	0.513
1904247_Proteos_005.RAW	AF-M	Artificial Fingerprint	High	Sequest HT	Sequest HT (A2)	A	2	Unambiguous	HGSGSGQSPSPSR	HGSGSGQSPSPSR		1	1	Q86YZ3	Q86YZ3	Hornerin OS=Homo sapiens OX=9606 GN=HRNR PE=1 SV=2	0	2	2	0.6534	0	1	1	1	620.787	1240.57	1240.57	-0.24	-0.00015	0	0	1.19377e+06	HCD	MS2	8.69305	50	15.3499	3125	3125	3122	0/0		4.01	1710	0	4.015e-05	1.21
1904247_Proteos_005.RAW	AF-M	Artificial Fingerprint	High	Sequest HT	Sequest HT (A2)	A	2	Unambiguous	HTQTSSGGQAASSHEQAR	HTQTSSGGQAASSHEQAR		1	1	P20930	P20930	Filaggrin OS=Homo sapiens OX=9606 GN=FLG PE=1 SV=3	0	3	3	0.4653	0	1	1	1	613.949	1839.83	1839.83	0.34	0.00021	0	0	393797	HCD	MS2	27.7673	50	15.3552	3129	3129	3122	0/0		3.03	4141	0	0.0009771	0.73
1904247_Proteos_005.RAW	AF-M	Artificial Fingerprint	High	Sequest HT	Sequest HT (A2)	A	2	Selected	KQEKALR	KqEKALR	Q2(Deamidated)	1	1	Q9UKJ3	Q9UKJ3	G patch domain-containing protein 8 OS=Homo sapiens OX=9606 GN=GPATCH8 PE=1 SV=2	2	2	2	0	0	1	1	1	437.261	873.515	873.515	0.28	0.00012	0	0	409431	HCD	MS2	22.4322	50	15.3801	3145	3145	3138	0/0		1.82	816	0.001797	0.03968	0.173
1904247_Proteos_005.RAW	AF-M	Artificial Fingerprint	High	Sequest HT	Sequest HT (A2)	A	2	Unambiguous	GEQHGSSSGSSSSYGQHGSGSR	GEQHGSSSGSSSSYGQHGSGSR		1	1	Q86YZ3	Q86YZ3	Hornerin OS=Homo sapiens OX=9606 GN=HRNR PE=1 SV=2	0	3	3	0.4942	0	1	1	1	708.297	2122.88	2122.88	0.13	9e-05	0	0	527930	HCD	MS2	2.88745	50	15.447	3187	3187	3186	0/0		3.46	4192	0	0.0008182	0.757
1904247_Proteos_005.RAW	AF-M	Artificial Fingerprint	High	Sequest HT	Sequest HT (A2)	A	2	Unambiguous	SEQHGSSSGSSSSYGQHGSGSR	SEQHGSSSGSSSSYGQHGSGSR		1	1	Q86YZ3	Q86YZ3	Hornerin OS=Homo sapiens OX=9606 GN=HRNR PE=1 SV=2	0	3	3	0.4417	0	1	1	1	718.3	2152.88	2152.89	-1.54	-0.00111	0	0	137120	HCD	MS2	0	50	15.4548	3193	3193	3186	0/0		2.4	4008	0.0007241	0.009907	0.382
1904247_Proteos_005.RAW	AF-M	Artificial Fingerprint	High	Sequest HT	Sequest HT (A2)	A	2	Unambiguous	GEQHGSSSGSSSSYGQHGSGSR	GEQHGSSSGSSSSYGQHGSGSR		1	1	Q86YZ3	Q86YZ3	Hornerin OS=Homo sapiens OX=9606 GN=HRNR PE=1 SV=2	0	2	2	0.6499	0	1	1	1	1061.94	2122.88	2122.88	-0.06	-7e-05	0	0	186784	HCD	MS2	15.4203	50	15.4786	3208	3208	3202	0/0		4.57	4172	0	0.0001024	1.069
1904247_Proteos_005.RAW	AF-M	Artificial Fingerprint	High	Sequest HT	Sequest HT (A2)	A	2	Unambiguous	GEQHGSSSGSSSSYGQHGSGSR	GEQHGSSSGSSSSYGQHGSGSR		1	1	Q86YZ3	Q86YZ3	Hornerin OS=Homo sapiens OX=9606 GN=HRNR PE=1 SV=2	0	4	4	0.3722	0	1	1	1	531.475	2122.88	2122.88	0.56	0.0003	0	0	721087	HCD	MS2	8.31347	50	15.4827	3211	3211	3202	0/0		4.03	4259	0.0007241	0.01856	0.288
1904247_Proteos_005.RAW	AF-M	Artificial Fingerprint	High	Sequest HT	Sequest HT (A2)	A	2	Unambiguous	SEQHGSSSGSSSSYGQHGSGSR	SEQHGSSSGSSSSYGQHGSGSR		1	1	Q86YZ3	Q86YZ3	Hornerin OS=Homo sapiens OX=9606 GN=HRNR PE=1 SV=2	0	4	4	0.4444	0	1	1	1	538.977	2152.89	2152.89	0.18	0.0001	0	0	1273939	HCD	MS2	10.0782	50	15.5049	3222	3222	3220	0/0		4.14	4059	0	0.0007163	0.777
1904247_Proteos_005.RAW	AF-M	Artificial Fingerprint	High	Sequest HT	Sequest HT (A2)	A	2	Unambiguous	SEQHGSSSGSSSSYGQHGSGSR	SEQHGSSSGSSSSYGQHGSGSR		1	1	Q86YZ3	Q86YZ3	Hornerin OS=Homo sapiens OX=9606 GN=HRNR PE=1 SV=2	0	2	2	0.64	0	1	1	1	1076.95	2152.89	2152.89	-0.09	-0.0001	0	0	279396	HCD	MS2	0	50	15.5076	3224	3224	3220	0/0		5	4022	0	2.748e-06	1.613
1904247_Proteos_005.RAW	AF-M	Artificial Fingerprint	High	Sequest HT	Sequest HT (A2)	A	2	Unambiguous	HSQVGQGESAGSK	HSQVGQGESAGSK		1	1	P20930	P20930	Filaggrin OS=Homo sapiens OX=9606 GN=FLG PE=1 SV=3	0	3	3	0.0581	0	1	1	1	424.537	1271.6	1271.6	-0.26	-0.00011	0	0	331425	HCD	MS2	65.8334	50	15.5313	3239	3239	3236	0/0		1.72	1603	0.001797	0.03579	0.188
1904247_Proteos_005.RAW	AF-M	Artificial Fingerprint	High	Sequest HT	Sequest HT (A2)	A	2	Unambiguous	SSSGSSSSYGQHGSGSR	SSSGSSSSYGQHGSGSR		1	1	Q86YZ3	Q86YZ3	Hornerin OS=Homo sapiens OX=9606 GN=HRNR PE=1 SV=2	0	3	3	0.521	0	1	1	1	538.896	1614.67	1614.67	0.29	0.00016	0	0	2.88396e+06	HCD	MS2	11.4965	38.16	15.6259	3296	3296	3293	0/0		4.28	2494	0.0007241	0.003376	0.544
1904247_Proteos_005.RAW	AF-M	Artificial Fingerprint	High	Sequest HT	Sequest HT (A2)	A	2	Unambiguous	LGQGAHHAAGQAGK	LGQGAHHAAGQAGK		1	1	Q6UWP8	Q6UWP8	Suprabasin OS=Homo sapiens OX=9606 GN=SBSN PE=1 SV=2	0	2	2	0.4791	0	1	1	1	651.835	1302.66	1302.67	-2.13	-0.00139	0	0	267234	HCD	MS2	0	50	15.7793	3383	3383	3379	0/0		3.59	1362	0.0007241	0.01022	0.377
1904247_Proteos_005.RAW	AF-M	Artificial Fingerprint	High	Sequest HT	Sequest HT (A2)	A	2	Unambiguous	ALSSQHQAR	ALSSQHQAR		1	1	P11021	P11021	Endoplasmic reticulum chaperone BiP OS=Homo sapiens OX=9606 GN=HSPA5 PE=1 SV=2	0	2	2	0.12	0	1	1	1	499.263	997.519	997.517	1.97	0.00098	0	0	230374	HCD	MS2	33.072	50	15.7806	3384	3384	3379	0/0		1.5	737	0.002625	0.05904	0.112
1904247_Proteos_005.RAW	AF-M	Artificial Fingerprint	High	Sequest HT	Sequest HT (A2)	A	2	Unambiguous	LGQGAHHAAGQAGK	LGQGAHHAAGQAGK		1	1	Q6UWP8	Q6UWP8	Suprabasin OS=Homo sapiens OX=9606 GN=SBSN PE=1 SV=2	0	3	3	0.376	0	1	1	1	434.894	1302.67	1302.67	0.04	2e-05	0	0	905502	HCD	MS2	22.9304	50	15.7833	3386	3386	3379	0/0		2.58	1477	0.001797	0.03222	0.204
1904247_Proteos_005.RAW	AF-M	Artificial Fingerprint	High	Sequest HT	Sequest HT (A2)	A	2	Unambiguous	HGSGSGQSSGFGHK	HGSGSGQSSGFGHK		1	1	Q86YZ3	Q86YZ3	Hornerin OS=Homo sapiens OX=9606 GN=HRNR PE=1 SV=2	0	3	3	0.5799	0	1	1	1	443.869	1329.59	1329.59	0.07	3e-05	0	0	7.28485e+06	HCD	MS2	0.826644	9.633	15.7948	3392	3392	3389	0/0		3.19	1976	0.0007241	0.006605	0.443
1904247_Proteos_005.RAW	AF-M	Artificial Fingerprint	High	Sequest HT	Sequest HT (A2)	A	2	Unambiguous	HGSGSGQSSGFGHK	HGSGSGQSSGFGHK		1	1	Q86YZ3	Q86YZ3	Hornerin OS=Homo sapiens OX=9606 GN=HRNR PE=1 SV=2	0	2	2	0.6418	0	1	1	1	665.3	1329.59	1329.59	0.1	7e-05	0	0	1.42649e+06	HCD	MS2	7.47008	50	15.8026	3398	3398	3389	0/0		4.69	1976	0	5.882e-05	1.153
1904247_Proteos_005.RAW	AF-M	Artificial Fingerprint	High	Sequest HT	Sequest HT (A2)	A	2	Unambiguous	HGAGSGQSLSHGR	HGAGSGQSLSHGR		1	1	Q86YZ3	Q86YZ3	Hornerin OS=Homo sapiens OX=9606 GN=HRNR PE=1 SV=2	0	3	3	0.4149	0	1	1	1	417.538	1250.6	1250.6	0.11	5e-05	0	0	1.9361e+06	HCD	MS2	30.4867	29.163	15.8193	3408	3408	3404	0/0		2.82	1505	0.0007241	0.008643	0.403
1904247_Proteos_005.RAW	AF-M	Artificial Fingerprint	High	Sequest HT	Sequest HT (A2)	A	2	Unambiguous	HGAGSGQSLSHGR	HGAGSGQSLSHGR		1	1	Q86YZ3	Q86YZ3	Hornerin OS=Homo sapiens OX=9606 GN=HRNR PE=1 SV=2	0	2	2	0.7019	0	1	1	1	625.803	1250.6	1250.6	0.27	0.00017	0	0	370928	HCD	MS2	0	50	15.8246	3412	3412	3404	0/0		2.65	1540	0	0.0003255	0.895
1904247_Proteos_005.RAW	AF-M	Artificial Fingerprint	High	Sequest HT	Sequest HT (A2)	A	2	Unambiguous	NTDTLSKK	NTDTLSKK		1	1	P20930	P20930	Filaggrin OS=Homo sapiens OX=9606 GN=FLG PE=1 SV=3	1	2	2	0.25	0	1	1	1	453.748	906.489	906.489	-0.23	-0.0001	0	0	849259	HCD	MS2	34.6678	50	15.8716	3439	3439	3436	0/0		1.88	653	0.002625	0.05523	0.122
1904247_Proteos_005.RAW	AF-M	Artificial Fingerprint	High	Sequest HT	Sequest HT (A2)	A	2	Unambiguous	KGYSPTHR	KGYSPTHR		1	1	P20930	P20930	Filaggrin OS=Homo sapiens OX=9606 GN=FLG PE=1 SV=3	1	2	2	0.4359	0	1	1	1	473.248	945.49	945.49	-0.38	-0.00018	0	0	217974	HCD	MS2	38.0622	50	15.8742	3441	3441	3436	0/0		1.95	1006	0.002625	0.06781	0.091
1904247_Proteos_005.RAW	AF-M	Artificial Fingerprint	High	Sequest HT	Sequest HT (A2)	A	2	Unambiguous	HGSTSGQSSSSGQHDSSSGQSSSYGQHESASHHASGR	HGSTSGQSSSSGQHDSSSGQSSSYGQHESASHHASGR		1	1	Q86YZ3	Q86YZ3	Hornerin OS=Homo sapiens OX=9606 GN=HRNR PE=1 SV=2	0	5	5	0.3407	0	1	1	1	734.91	3670.52	3670.51	2.61	0.00191	0	0	167008	HCD	MS2	3.86765	50	15.9381	3478	3478	3475	0/0		4.55	7710	0	7.988e-05	1.107
1904247_Proteos_005.RAW	AF-M	Artificial Fingerprint	High	Sequest HT	Sequest HT (A2)	A	2	Unambiguous	DKNTDTLSKK	DKNTDTLSKK		1	1	P20930	P20930	Filaggrin OS=Homo sapiens OX=9606 GN=FLG PE=1 SV=3	2	2	2	0.2871	0	1	1	1	575.31	1149.61	1149.61	0.97	0.00056	0	0	612402	HCD	MS2	11.0827	50	16.0558	3530	3530	3529	0/0		2.09	915	0.002625	0.06081	0.108
1904247_Proteos_005.RAW	AF-M	Artificial Fingerprint	High	Sequest HT	Sequest HT (A2)	A	2	Unambiguous	HGSGSGHSSSHGQHGSGSSYSYSR	HGSGSGHSSSHGQHGSGSSYSYSR		1	1	Q86YZ3	Q86YZ3	Hornerin OS=Homo sapiens OX=9606 GN=HRNR PE=1 SV=2	0	4	4	0.6073	0	1	1	1	598.253	2389.99	2389.99	0.01	0	0	0	1.5627e+06	HCD	MS2	0.52771	45.815	16.1575	3593	3593	3590	0/0		5.22	5569	0	0.0002163	0.957
1904247_Proteos_005.RAW	AF-M	Artificial Fingerprint	High	Sequest HT	Sequest HT (A2)	A	2	Unambiguous	NTKHEISEMNR	NTKHEISEmNR	M9(Oxidation)	1	1	P13647	P13647	Keratin, type II cytoskeletal 5 OS=Homo sapiens OX=9606 GN=KRT5 PE=1 SV=3	1	3	3	0.2065	0	1	1	1	458.886	1374.64	1374.64	-0.2	-9e-05	0	0	1.8522e+06	HCD	MS2	21.359	30.036	16.1587	3594	3594	3590	0/0		1.84	2124	0.001797	0.03179	0.206
1904247_Proteos_005.RAW	AF-M	Artificial Fingerprint	High	Sequest HT	Sequest HT (A2)	A	2	Unambiguous	HGSGSGHSSSHGQHGSGSSYSYSR	HGSGSGHSSSHGQHGSGSSYSYSR		1	1	Q86YZ3	Q86YZ3	Hornerin OS=Homo sapiens OX=9606 GN=HRNR PE=1 SV=2	0	3	3	0.6036	0	1	1	1	797.333	2389.98	2389.99	-2.39	-0.0019	0	0	398380	HCD	MS2	0	50	16.1613	3596	3596	3590	0/0		6.13	5379	0	0.0001359	1.027
1904247_Proteos_005.RAW	AF-M	Artificial Fingerprint	High	Sequest HT	Sequest HT (A2)	A	2	Unambiguous	SGSGQSSGYSQHGSGSSHSSGYRK	SGSGQSSGYSQHGSGSSHSSGYRK		1	1	Q86YZ3	Q86YZ3	Hornerin OS=Homo sapiens OX=9606 GN=HRNR PE=1 SV=2	1	4	4	0.4889	0	1	1	1	593.762	2372.03	2372.02	0.7	0.00041	0	0	459957	HCD	MS2	14.5626	50	16.1627	3597	3597	3590	0/0		4.95	7012	0	0.0007978	0.761
1904247_Proteos_005.RAW	AF-M	Artificial Fingerprint	High	Sequest HT	Sequest HT (A2)	A	2	Unambiguous	KLEDSTR	KLEDSTR		1	1	P15924	P15924	Desmoplakin OS=Homo sapiens OX=9606 GN=DSP PE=1 SV=3	1	2	2	0.2746	0	1	1	1	424.727	848.447	848.447	-0.18	-8e-05	0	0	236649	HCD	MS2	30.7378	50	16.1798	3607	3607	3606	0/0		1.42	763	0.002625	0.05076	0.135
1904247_Proteos_005.RAW	AF-M	Artificial Fingerprint	High	Sequest HT	Sequest HT (A2)	A	2	Unambiguous	SSQSSTLSHSNR	SSQSSTLSHSNR		1	1	Q13835	Q13835	Plakophilin-1 OS=Homo sapiens OX=9606 GN=PKP1 PE=1 SV=2	0	2	2	0.4461	0	1	1	1	645.806	1290.6	1290.6	0.98	0.00063	0	0	238939	HCD	MS2	13.0958	50	16.1903	3615	3615	3606	0/0		2.04	1627	0.0007241	0.007958	0.415
1904247_Proteos_005.RAW	AF-M	Artificial Fingerprint	High	Sequest HT	Sequest HT (A2)	A	2	Unambiguous	SGQSSRGEQHGSSSGSSSSYGQHGSGSR	SGQSSRGEqHGSSSGSSSSYGQHGSGSR	Q9(Deamidated)	1	1	Q86YZ3	Q86YZ3	Hornerin OS=Homo sapiens OX=9606 GN=HRNR PE=1 SV=2	1	4	4	0.0046	0	1	1	1	682.289	2726.14	2726.14	-1.01	-0.00069	0	0	128842	HCD	MS2	0	50	16.1956	3619	3619	3606	0/0		2.18	6736	0.0007241	0.01823	0.29
1904247_Proteos_005.RAW	AF-M	Artificial Fingerprint	High	Sequest HT	Sequest HT (A2)	A	2	Unambiguous	SGQSSRGEQHGSSSGSSSSYGQHGSGSR	SGqSSRGEQHGSSSGSSSSYGQHGSGSR	Q3(Deamidated)	1	1	Q86YZ3	Q86YZ3	Hornerin OS=Homo sapiens OX=9606 GN=HRNR PE=1 SV=2	1	4	4		0.0046	2	2	2	682.289	2726.14	2726.14	-1.01	-0.00069	0	0	128842	HCD	MS2	0	50	16.1956	3619	3619	3606	0/0		2.17	6736	0.001797	0.04385	0.158
1904247_Proteos_005.RAW	AF-M	Artificial Fingerprint	High	Sequest HT	Sequest HT (A2)	A	2	Unambiguous	QGSSAGSSSSYGQHGSGSR	QGSSAGSSSSYGQHGSGSR		1	1	Q86YZ3	Q86YZ3	Hornerin OS=Homo sapiens OX=9606 GN=HRNR PE=1 SV=2	0	3	3	0.5769	0	1	1	1	595.258	1783.76	1783.76	-0.07	-4e-05	0	0	439192	HCD	MS2	5.78467	50	16.2283	3638	3638	3634	0/0		3.9	3123	0	0.0002399	0.941
1904247_Proteos_005.RAW	AF-M	Artificial Fingerprint	High	Sequest HT	Sequest HT (A2)	A	2	Unambiguous	GSGSSQSSGYGR	GSGSSQSSGYGR		1	1	Q86YZ3	Q86YZ3	Hornerin OS=Homo sapiens OX=9606 GN=HRNR PE=1 SV=2	0	2	2	0.3907	0	1	1	1	565.247	1129.49	1129.49	0.76	0.00043	0	0	154297	HCD	MS2	13.8946	50	16.231	3640	3640	3634	0/0		2.15	1293	0.0007241	0.02331	0.253
1904247_Proteos_005.RAW	AF-M	Artificial Fingerprint	High	Sequest HT	Sequest HT (A2)	A	2	Unambiguous	QGSSAGSSSSYGQHGSGSR	QGSSAGSSSSYGQHGSGSR		1	1	Q86YZ3	Q86YZ3	Hornerin OS=Homo sapiens OX=9606 GN=HRNR PE=1 SV=2	0	2	2	0.5829	0	1	1	1	892.385	1783.76	1783.76	1.55	0.00138	0	0	58712.5	HCD	MS2	0	50	16.2337	3642	3642	3634	0/0		1.99	3326	0.001797	0.03307	0.2
1904247_Proteos_005.RAW	AF-M	Artificial Fingerprint	High	Sequest HT	Sequest HT (A2)	A	2	Unambiguous	HGAGSGQSLSHGR	HGAGSGqSLSHGR	Q7(Deamidated)	1	1	Q86YZ3	Q86YZ3	Hornerin OS=Homo sapiens OX=9606 GN=HRNR PE=1 SV=2	0	3	3	0.3945	0	1	1	1	417.865	1251.58	1251.58	-0.7	-0.00029	0	0	453287	HCD	MS2	50.0546	50	16.3032	3678	3678	3672	0/0		2.89	1510	0	0.003267	0.549
1904247_Proteos_005.RAW	AF-M	Artificial Fingerprint	High	Sequest HT	Sequest HT (A2)	A	2	Unambiguous	AGAHLQGGAK	AGAHLQGGAK		1	1	P04406	P04406	Glyceraldehyde-3-phosphate dehydrogenase OS=Homo sapiens OX=9606 GN=GAPDH PE=1 SV=3	0	2	2	0.5145	0	1	1	1	455.249	909.49	909.49	0.21	0.0001	0	0	572625	HCD	MS2	4.89035	50	16.3317	3694	3694	3691	0/0		2.76	611	0.001797	0.03315	0.2
1904247_Proteos_005.RAW	AF-M	Artificial Fingerprint	High	Sequest HT	Sequest HT (A2)	A	2	Unambiguous	QSSSYGQHESASR	QSSSYGQHESASR		1	1	Q86YZ3	Q86YZ3	Hornerin OS=Homo sapiens OX=9606 GN=HRNR PE=1 SV=2	0	2	2	0.5925	0	1	1	1	712.313	1423.62	1423.62	-0.16	-0.00011	0	0	189062	HCD	MS2	12.4982	50	16.337	3698	3698	3691	0/0		3.19	1739	0	0.0005786	0.809
1904247_Proteos_005.RAW	AF-M	Artificial Fingerprint	High	Sequest HT	Sequest HT (A2)	A	2	Unambiguous	SSSGQSSGYSQHGSGSGHSSGYGQHGSR	SSSGQSSGYSQHGSGSGHSSGYGQHGSR		1	1	Q86YZ3	Q86YZ3	Hornerin OS=Homo sapiens OX=9606 GN=HRNR PE=1 SV=2	0	4	4	0.4605	0	1	1	1	678.286	2710.12	2710.12	0.49	0.00033	0	0	98296.9	HCD	MS2	10.1781	50	16.5457	3817	3817	3806	0/0		4.43	6957	0.0007241	0.02106	0.269
1904247_Proteos_005.RAW	AF-M	Artificial Fingerprint	High	Sequest HT	Sequest HT (A2)	A	2	Unambiguous	SSSGQSSGYSQHGSGSGHSSGYGQHGSR	SSSGQSSGYSQHGSGSGHSSGYGQHGSR		1	1	Q86YZ3	Q86YZ3	Hornerin OS=Homo sapiens OX=9606 GN=HRNR PE=1 SV=2	0	5	5	0.4435	0	1	1	1	542.831	2710.12	2710.12	0.71	0.00039	0	0	617592	HCD	MS2	5.56742	50	16.5602	3825	3825	3822	0/0		4.69	6941	0	3.688e-05	1.223
1904247_Proteos_005.RAW	AF-M	Artificial Fingerprint	High	Sequest HT	Sequest HT (A2)	A	2	Unambiguous	SSSGQSSGYSQHGSGSGHSSGYGQHGSR	SSSGQSSGYSQHGSGSGHSSGYGQHGSR		1	1	Q86YZ3	Q86YZ3	Hornerin OS=Homo sapiens OX=9606 GN=HRNR PE=1 SV=2	0	3	3	0.5617	0	1	1	1	904.046	2710.12	2710.12	0.39	0.00035	0	0	258472	HCD	MS2	0	50	16.5655	3829	3829	3822	0/0		5.27	6937	0	2.329e-05	1.292
1904247_Proteos_005.RAW	AF-M	Artificial Fingerprint	High	Sequest HT	Sequest HT (A2)	A	2	Unambiguous	SGQSSGYGQHGSSSGHSSTHGQHGSTSGQSSSCGQHGASSGQSSSHGQHGSGSSQSSGYGR	SGQSSGYGqHGSSSGHSSTHGqHGSTSGQSSScGQHGASSGQSSSHGQHGSGSSQSSGYGR	Q9(Deamidated); Q22(Deamidated); C33(Carbamidomethyl)	1	1	Q86YZ3	Q86YZ3	Hornerin OS=Homo sapiens OX=9606 GN=HRNR PE=1 SV=2	0	5	5	0.0182	0	1	1	1	1167.68	5834.38	5834.34	6.55	0.00764	0	0	228928	HCD	MS2	0	50	16.6008	3850	3850	3848	0/0		2.74	3165	0.001797	0.03448	0.194
1904247_Proteos_005.RAW	AF-M	Artificial Fingerprint	High	Sequest HT	Sequest HT (A2)	A	2	Unambiguous	SGQSSGYGQHGSSSGHSSTHGQHGSTSGQSSSCGQHGASSGQSSSHGQHGSGSSQSSGYGR	SGQSSGYGQHGSSSGHSSTHGQHGSTSGqSSScGqHGASSGQSSSHGQHGSGSSQSSGYGR	Q29(Deamidated); C33(Carbamidomethyl); Q35(Deamidated)	1	1	Q86YZ3	Q86YZ3	Hornerin OS=Homo sapiens OX=9606 GN=HRNR PE=1 SV=2	0	5	5		0.0182	2	2	2	1167.68	5834.38	5834.34	6.55	0.00764	0	0	228928	HCD	MS2	0	50	16.6008	3850	3850	3848	0/0		2.69	3165	0.001406	0.02818	0.225
1904247_Proteos_005.RAW	AF-M	Artificial Fingerprint	High	Sequest HT	Sequest HT (A2)	A	2	Unambiguous	GGSGGGGGGSSGGRGSGGGSSGGSIGGR	GGSGGGGGGSSGGRGSGGGSSGGSIGGR		1	1	P04264	P04264	Keratin, type II cytoskeletal 1 OS=Homo sapiens OX=9606 GN=KRT1 PE=1 SV=6	1	3	3	0.5307	0	1	1	1	693.977	2079.92	2079.91	0.22	0.00015	0	0	299690	HCD	MS2	0	50	16.6735	3890	3890	3885	0/0		3.75	5797	0.002625	0.06274	0.103
1904247_Proteos_005.RAW	AF-M	Artificial Fingerprint	High	Sequest HT	Sequest HT (A2)	A	2	Unambiguous	QSPSYGR	QSPSYGR		1	1	Q86YZ3	Q86YZ3	Hornerin OS=Homo sapiens OX=9606 GN=HRNR PE=1 SV=2	0	2	2	0.3865	0	1	1	1	397.693	794.379	794.379	0.3	0.00012	0	0	555356	HCD	MS2	25.3421	50	16.8136	3973	3973	3967	0/0		1.63	563	0.002625	0.053	0.129
1904247_Proteos_005.RAW	AF-M	Artificial Fingerprint	High	Sequest HT	Sequest HT (A2)	A	2	Unambiguous	GSSGLGGGSSR	GSSGLGGGSSR		1	1	Q04695	Q04695	Keratin, type I cytoskeletal 17 OS=Homo sapiens OX=9606 GN=KRT17 PE=1 SV=2	0	2	2	0.6016	0	1	1	1	461.223	921.438	921.438	-0.05	-2e-05	0	0	6.01821e+06	HCD	MS2	2.47852	15.609	16.8344	3986	3986	3983	0/0		2.51	708	0.001797	0.03061	0.212
1904247_Proteos_005.RAW	AF-M	Artificial Fingerprint	High	Sequest HT	Sequest HT (A2)	A	2	Unambiguous	SGSGQSSGYSQHGSGSSHSSGYR	SGSGQSSGYSQHGSGSSHSSGYR		1	1	Q86YZ3	Q86YZ3	Hornerin OS=Homo sapiens OX=9606 GN=HRNR PE=1 SV=2	0	3	3	0.5801	0	1	1	1	748.648	2243.93	2243.93	-0.4	-0.0003	0	0	868359	HCD	MS2	0	50	16.8696	4007	4007	4001	0/0		6.93	4843	0	0.0001112	1.057
1904247_Proteos_005.RAW	AF-M	Artificial Fingerprint	High	Sequest HT	Sequest HT (A2)	A	2	Unambiguous	SGSGQSSGYSQHGSGSSHSSGYR	SGSGQSSGYSQHGSGSSHSSGYR		1	1	Q86YZ3	Q86YZ3	Hornerin OS=Homo sapiens OX=9606 GN=HRNR PE=1 SV=2	0	4	4	0.5516	0	1	1	1	561.737	2243.93	2243.93	-0.68	-0.00038	0	0	3.82839e+06	HCD	MS2	0.853373	21.203	16.8865	4017	4017	4014	0/0		6.78	4845	0	0.000728	0.775
1904247_Proteos_005.RAW	AF-M	Artificial Fingerprint	High	Sequest HT	Sequest HT (A2)	A	2	Unambiguous	SGSGQSSGYSQHGSGSSHSSGYR	SGSGQSSGYSQHGSGSSHSSGYR		1	1	Q86YZ3	Q86YZ3	Hornerin OS=Homo sapiens OX=9606 GN=HRNR PE=1 SV=2	0	2	2	0.4953	0	1	1	1	1122.47	2243.93	2243.93	-1.27	-0.00142	0	0	148883	HCD	MS2	0	50	16.8946	4023	4023	4014	0/0		2.14	4789	0.001797	0.0316	0.207
1904247_Proteos_005.RAW	AF-M	Artificial Fingerprint	High	Sequest HT	Sequest HT (A2)	A	2	Unambiguous	KGPAAIQK	KGPAAIQK		1	1	P35527	P35527	Keratin, type I cytoskeletal 9 OS=Homo sapiens OX=9606 GN=KRT9 PE=1 SV=3	1	2	2	0.4856	0	1	1	1	406.753	812.498	812.499	-0.57	-0.00023	0	0	459332	HCD	MS2	18.2234	50	16.9552	4054	4054	4052	0/0		2.43	160	0.002625	0.0676	0.091
1904247_Proteos_005.RAW	AF-M	Artificial Fingerprint	High	Sequest HT	Sequest HT (A2)	A	2	Unambiguous	FSSSGGGGGGGR	FSSSGGGGGGGR		1	1	P35527	P35527	Keratin, type I cytoskeletal 9 OS=Homo sapiens OX=9606 GN=KRT9 PE=1 SV=3	0	2	2	0.5167	0	1	1	1	491.72	982.434	982.434	-0.18	-9e-05	0	0	1385338	HCD	MS2	0	50	16.9615	4056	4056	4055	0/0		2.69	855	0.0007241	0.004715	0.494
1904247_Proteos_005.RAW	AF-M	Artificial Fingerprint	High	Sequest HT	Sequest HT (A2)	A	2	Unambiguous	VLEQDKAR	VLEQDKAR		1	1	P15924	P15924	Desmoplakin OS=Homo sapiens OX=9606 GN=DSP PE=1 SV=3	1	2	2	0.2727	0	1	1	1	479.769	958.531	958.532	-0.27	-0.00013	0	0	260939	HCD	MS2	28.4929	50	17.1149	4124	4124	4119	0/0		1.43	861	0.001797	0.03735	0.182
1904247_Proteos_005.RAW	AF-M	Artificial Fingerprint	High	Sequest HT	Sequest HT (A2)	A	2	Unambiguous	QSLGHGQHGSGSGQSPSPSR	QSLGHGQHGSGSGQSPSPSR		1	1	Q86YZ3	Q86YZ3	Hornerin OS=Homo sapiens OX=9606 GN=HRNR PE=1 SV=2	0	2	2	0.5621	0	1	1	1	974.455	1947.9	1947.9	0.22	0.00022	0	0	122660	HCD	MS2	0	50	17.1474	4143	4143	4138	0/0		3.06	4793	0.0007241	0.005121	0.481
1904247_Proteos_005.RAW	AF-M	Artificial Fingerprint	High	Sequest HT	Sequest HT (A2)	A	2	Unambiguous	GENALKDAK	GENALKDAK		1	1	P04264	P04264	Keratin, type II cytoskeletal 1 OS=Homo sapiens OX=9606 GN=KRT1 PE=1 SV=6	1	2	2	0.4516	0	1	1	1	473.254	945.501	945.5	0.71	0.00034	0	0	468297	HCD	MS2	32.7152	50	17.1813	4160	4160	4156	0/0		2.79	1040	0.002625	0.06164	0.105
1904247_Proteos_005.RAW	AF-M	Artificial Fingerprint	High	Sequest HT	Sequest HT (A2)	A	2	Unambiguous	SEQHGSSSGLSSSYGQHGSGSHQSSGHGR	SEQHGSSSGLSSSYGQHGSGSHQSSGHGR		1	1	Q86YZ3	Q86YZ3	Hornerin OS=Homo sapiens OX=9606 GN=HRNR PE=1 SV=2	0	5	5	0.4322	0	1	1	1	574.65	2869.22	2869.22	0.1	6e-05	0	0	2.12382e+06	HCD	MS2	12.4247	30.312	17.2035	4174	4174	4169	0/0		4.79	8634	0	0.0001186	1.047
1904247_Proteos_005.RAW	AF-M	Artificial Fingerprint	High	Sequest HT	Sequest HT (A2)	A	2	Unambiguous	SSSGQSSGYTQHGSGSGHSSSYEQHGSR	SSSGQSSGYTQHGSGSGHSSSYEQHGSR		1	1	Q86YZ3	Q86YZ3	Hornerin OS=Homo sapiens OX=9606 GN=HRNR PE=1 SV=2	0	5	5	0.3596	0	1	1	1	566.04	2826.17	2826.17	0.37	0.00021	0	0	1.80205e+06	HCD	MS2	0	50	17.244	4199	4199	4198	0/0		4.7	6750	0.001797	0.03596	0.188
1904247_Proteos_005.RAW	AF-M	Artificial Fingerprint	High	Sequest HT	Sequest HT (A2)	A	2	Unambiguous	KYEDEINKR	KYEDEINKR		1	3	P35908	P35908; Q01546; P12035	Keratin, type II cytoskeletal 2 epidermal OS=Homo sapiens OX=9606 GN=KRT2 PE=1 SV=2; Keratin, type II cytoskeletal 2 oral OS=Homo sapiens OX=9606 GN=KRT76 PE=1 SV=2; Keratin, type II cytoskeletal 3 OS=Homo sapiens OX=9606 GN=KRT3 PE=1 SV=3	2	3	3	0.1908	0	1	1	1	398.875	1194.61	1194.61	-0.81	-0.00032	0	0	145676	HCD	MS2	42.2983	50	17.3282	4243	4243	4239	0/0		1.73	1168	0.001406	0.02811	0.225
1904247_Proteos_005.RAW	AF-M	Artificial Fingerprint	High	Sequest HT	Sequest HT (A2)	A	2	Unambiguous	STTNKLETR	STTNKLETR		1	1	Q13835	Q13835	Plakophilin-1 OS=Homo sapiens OX=9606 GN=PKP1 PE=1 SV=2	1	2	2	0.0703	0	1	1	1	525.283	1049.56	1049.56	0.31	0.00016	0	0	267184	HCD	MS2	38.2716	50	17.3632	4264	4264	4260	0/0		1.85	841	0.0007241	0.01658	0.305
1904247_Proteos_005.RAW	AF-M	Artificial Fingerprint	High	Sequest HT	Sequest HT (A2)	A	2	Unambiguous	QFTSSSSMK	QFTSSSSmK	M8(Oxidation)	2	2	P02533; P08779	P02533; P08779	Keratin, type I cytoskeletal 14 OS=Homo sapiens OX=9606 GN=KRT14 PE=1 SV=4; Keratin, type I cytoskeletal 16 OS=Homo sapiens OX=9606 GN=KRT16 PE=1 SV=4	0	2	2	0.3693	0	1	1	1	509.729	1018.45	1018.45	0.05	2e-05	0	0	1.309e+06	HCD	MS2	11.7541	50	17.4328	4308	4308	4305	0/0		1.76	869	0.002625	0.06488	0.098
1904247_Proteos_005.RAW	AF-M	Artificial Fingerprint	High	Sequest HT	Sequest HT (A2)	A	2	Unambiguous	SGQSSYGQHSSGSSQSSGYGQHGSR	SGQSSYGQHSSGSSQSSGYGQHGSR		1	1	Q5D862	Q5D862	Filaggrin-2 OS=Homo sapiens OX=9606 GN=FLG2 PE=1 SV=1	0	3	3	0.5798	0	1	1	1	834.02	2500.05	2500.05	-0.01	-1e-05	0	0	345833	HCD	MS2	3.24752	50	17.4644	4329	4329	4321	0/0		6.33	6479	0	4.739e-07	1.877
1904247_Proteos_005.RAW	AF-M	Artificial Fingerprint	High	Sequest HT	Sequest HT (A2)	A	2	Unambiguous	SGQSSYGQHSSGSSQSSGYGQHGSR	SGQSSYGQHSSGSSQSSGYGQHGSR		1	1	Q5D862	Q5D862	Filaggrin-2 OS=Homo sapiens OX=9606 GN=FLG2 PE=1 SV=1	0	4	4	0.4048	0	1	1	1	625.767	2500.05	2500.05	0.38	0.00024	0	0	1.73891e+06	HCD	MS2	1.10332	50	17.4829	4340	4340	4337	0/0		5.41	6553	0	0.0001724	0.991
1904247_Proteos_005.RAW	AF-M	Artificial Fingerprint	High	Sequest HT	Sequest HT (A2)	A	2	Unambiguous	KGPAAIQK	KGPAAIqK	Q7(Deamidated)	1	1	P35527	P35527	Keratin, type I cytoskeletal 9 OS=Homo sapiens OX=9606 GN=KRT9 PE=1 SV=3	1	2	2	0.4667	0	1	1	1	407.244	813.481	813.483	-1.78	-0.00072	0	0	586177	HCD	MS2	31.3316	50	17.4854	4342	4342	4337	0/0		2.55	243	0.002625	0.06252	0.103
1904247_Proteos_005.RAW	AF-M	Artificial Fingerprint	High	Sequest HT	Sequest HT (A2)	A	2	Unambiguous	SGQSSYGQHSSGSSQSSGYGQHGSR	SGQSSYGQHSSGSSQSSGYGQHGSR		1	1	Q5D862	Q5D862	Filaggrin-2 OS=Homo sapiens OX=9606 GN=FLG2 PE=1 SV=1	0	2	2	0.5078	0	1	1	1	1250.53	2500.05	2500.05	1.8	0.00225	0	0	44397.2	HCD	MS2	0	50	17.5067	4355	4355	4353	0/0		1.93	6769	0.003126	0.07	0.086
1904247_Proteos_005.RAW	AF-M	Artificial Fingerprint	High	Sequest HT	Sequest HT (A2)	A	2	Unambiguous	HSASQDGQDTIR	HSASQDGQDTIR		1	1	P20930	P20930	Filaggrin OS=Homo sapiens OX=9606 GN=FLG PE=1 SV=3	0	2	2	0.5052	0	1	1	1	657.806	1314.61	1314.6	1.33	0.00087	0	0	107386	HCD	MS2	20.9457	50	17.6288	4423	4423	4421	0/0		1.92	1899	0.001406	0.02857	0.223
1904247_Proteos_005.RAW	AF-M	Artificial Fingerprint	High	Sequest HT	Sequest HT (A2)	A	2	Unambiguous	HSGIGHGQASSAVR	HSGIGHGQASSAVR		1	1	P20930	P20930	Filaggrin OS=Homo sapiens OX=9606 GN=FLG PE=1 SV=3	0	3	3	0.5497	0	1	1	1	455.232	1363.68	1363.68	-0.07	-3e-05	0	0	603757	HCD	MS2	12.0099	50	17.6509	4434	4434	4431	0/0		3.62	1528	0.0007241	0.00355	0.536
1904247_Proteos_005.RAW	AF-M	Artificial Fingerprint	High	Sequest HT	Sequest HT (A2)	A	2	Unambiguous	NKYEDEINKR	NKYEDEINKR		4	6	P04264; P04259; A0A0S2Z428; P13647	P04264; P04259; A0A0S2Z428; P48668; P05787; P13647	Keratin, type II cytoskeletal 1 OS=Homo sapiens OX=9606 GN=KRT1 PE=1 SV=6; Keratin, type II cytoskeletal 6B OS=Homo sapiens OX=9606 GN=KRT6B PE=1 SV=5; HCG2039812 OS=Homo sapiens (Human) OX=9606 GN=KRT6A hCG_2039812; Keratin, type II cytoskeletal 6C OS=Homo sapiens OX=9606 GN=KRT6C PE=1 SV=3; Keratin, type II cytoskeletal 8 OS=Homo sapiens OX=9606 GN=KRT8 PE=1 SV=7; Keratin, type II cytoskeletal …	2	3	3	0.1835	0	1	1	1	436.89	1308.65	1308.65	0.18	8e-05	0	0	250607	HCD	MS2	8.38697	50	17.699	4459	4459	4456	0/0		2.18	1513	0.0007241	0.02034	0.274
1904247_Proteos_005.RAW	AF-M	Artificial Fingerprint	High	Sequest HT	Sequest HT (A2)	A	2	Unambiguous	NKYEDEINKR	NKYEDEINKR		4	6	P04264; P04259; A0A0S2Z428; P13647	P04264; P04259; A0A0S2Z428; P48668; P05787; P13647	Keratin, type II cytoskeletal 1 OS=Homo sapiens OX=9606 GN=KRT1 PE=1 SV=6; Keratin, type II cytoskeletal 6B OS=Homo sapiens OX=9606 GN=KRT6B PE=1 SV=5; HCG2039812 OS=Homo sapiens (Human) OX=9606 GN=KRT6A hCG_2039812; Keratin, type II cytoskeletal 6C OS=Homo sapiens OX=9606 GN=KRT6C PE=1 SV=3; Keratin, type II cytoskeletal 8 OS=Homo sapiens OX=9606 GN=KRT8 PE=1 SV=7; Keratin, type II cytoskeletal …	2	2	2	0.4566	0	1	1	1	654.831	1308.66	1308.65	0.91	0.00059	0	0	139229	HCD	MS2	4.97004	50	17.7134	4467	4467	4463	0/0		2.19	1435	0.002625	0.06669	0.093
1904247_Proteos_005.RAW	AF-M	Artificial Fingerprint	High	Sequest HT	Sequest HT (A2)	A	2	Unambiguous	GSGGGSSGGSIGGR	GSGGGSSGGSIGGR		1	1	P04264	P04264	Keratin, type II cytoskeletal 1 OS=Homo sapiens OX=9606 GN=KRT1 PE=1 SV=6	0	2	2	0.6723	0	1	1	1	546.755	1092.5	1092.5	0.35	0.00019	0	0	1.11163e+06	HCD	MS2	1.05195	50	17.7676	4493	4493	4492	0/0		3.54	1180	0	0.001234	0.695
1904247_Proteos_005.RAW	AF-M	Artificial Fingerprint	High	Sequest HT	Sequest HT (A2)	A	2	Unambiguous	YGQQGSGSGQSPSR	YGQQGSGSGqSPSR	Q10(Deamidated)	1	1	Q86YZ3	Q86YZ3	Hornerin OS=Homo sapiens OX=9606 GN=HRNR PE=1 SV=2	0	2	2	0.0112	0	1	1	1	698.808	1396.61	1396.61	-0.05	-4e-05	0	0	325216	HCD	MS2	19.5498	50	17.7703	4495	4495	4492	0/0		2.68	1787	0.001797	0.03334	0.199
1904247_Proteos_005.RAW	AF-M	Artificial Fingerprint	High	Sequest HT	Sequest HT (A2)	A	2	Unambiguous	YGQQGSGSGQSPSR	YGQqGSGSGQSPSR	Q4(Deamidated)	1	1	Q86YZ3	Q86YZ3	Hornerin OS=Homo sapiens OX=9606 GN=HRNR PE=1 SV=2	0	2	2		0.0112	2	2	2	698.808	1396.61	1396.61	-0.05	-4e-05	0	0	325216	HCD	MS2	19.5498	50	17.7703	4495	4495	4492	0/0		2.65	1787	0.001797	0.03186	0.206
1904247_Proteos_005.RAW	AF-M	Artificial Fingerprint	High	Sequest HT	Sequest HT (A2)	A	2	Unambiguous	YGQQGSGSGQSPSR	YGqQGSGSGQSPSR	Q3(Deamidated)	1	1	Q86YZ3	Q86YZ3	Hornerin OS=Homo sapiens OX=9606 GN=HRNR PE=1 SV=2	0	2	2		0.041	3	3	3	698.808	1396.61	1396.61	-0.05	-4e-05	0	0	325216	HCD	MS2	19.5498	50	17.7703	4495	4495	4492	0/0		2.57	1787	0.009708	0.1064	0.02
1904247_Proteos_005.RAW	AF-M	Artificial Fingerprint	High	Sequest HT	Sequest HT (A2)	A	2	Unambiguous	GSGGGSSGGSIGGRGSSSGGVK	GSGGGSSGGSIGGRGSSSGGVK		1	1	P04264	P04264	Keratin, type II cytoskeletal 1 OS=Homo sapiens OX=9606 GN=KRT1 PE=1 SV=6	1	3	3	0.1409	0	1	1	1	584.613	1751.83	1751.83	-0.49	-0.00028	0	0	140497	HCD	MS2	11.579	50	17.7717	4496	4496	4492	0/0		2.2	3649	0.003126	0.06976	0.086
1904247_Proteos_005.RAW	AF-M	Artificial Fingerprint	High	Sequest HT	Sequest HT (A2)	A	2	Unambiguous	EEDTSGYR	EEDTSGYR		1	1	P15924	P15924	Desmoplakin OS=Homo sapiens OX=9606 GN=DSP PE=1 SV=3	0	2	2	0.2817	0	1	1	1	478.701	956.395	956.396	-0.22	-0.0001	0	0	208800	HCD	MS2	31.1592	50	17.8227	4526	4526	4521	0/0		1.42	857	0.003126	0.06917	0.088
1904247_Proteos_005.RAW	AF-M	Artificial Fingerprint	High	Sequest HT	Sequest HT (A2)	A	2	Unambiguous	KGYSPTHREEEYGK	KGYSPTHREEEYGK		1	1	P20930	P20930	Filaggrin OS=Homo sapiens OX=9606 GN=FLG PE=1 SV=3	2	3	3	0.5	0	1	1	1	560.938	1680.8	1680.8	0.3	0.00017	0	0	398927	HCD	MS2	4.51124	50	17.9051	4574	4574	4570	0/0		3.84	3062	0.002625	0.06246	0.103
1904247_Proteos_005.RAW	AF-M	Artificial Fingerprint	High	Sequest HT	Sequest HT (A2)	A	2	Unambiguous	AEIDNVKK	AEIDNVKK		1	1	P13647	P13647	Keratin, type II cytoskeletal 5 OS=Homo sapiens OX=9606 GN=KRT5 PE=1 SV=3	1	2	2	0.1572	0	1	1	1	458.758	916.51	916.51	-0.14	-7e-05	0	0	230399	HCD	MS2	30.1578	50	17.909	4577	4577	4570	0/0		1.59	1001	0.002625	0.05054	0.136
1904247_Proteos_005.RAW	AF-M	Artificial Fingerprint	High	Sequest HT	Sequest HT (A2)	A	2	Unambiguous	FGQGAHHAAGQAGNEAGR	FGQGAHHAAGQAGNEAGR		1	1	Q6UWP8	Q6UWP8	Suprabasin OS=Homo sapiens OX=9606 GN=SBSN PE=1 SV=2	0	2	2	0.4763	0	1	1	1	868.401	1735.8	1735.8	-3.26	-0.00283	0	0	56482.4	HCD	MS2	18.5232	50	17.9131	4580	4580	4570	0/0		3.8	3535	0.0007241	0.00363	0.533
1904247_Proteos_005.RAW	AF-M	Artificial Fingerprint	High	Sequest HT	Sequest HT (A2)	A	2	Unambiguous	FGQGAHHAAGQAGNEAGR	FGQGAHHAAGQAGNEAGR		1	1	Q6UWP8	Q6UWP8	Suprabasin OS=Homo sapiens OX=9606 GN=SBSN PE=1 SV=2	0	4	4	0.3455	0	1	1	1	434.706	1735.8	1735.8	0.52	0.00023	0	0	3.3113e+06	HCD	MS2	1.01162	27.323	17.9325	4589	4589	4588	0/0		3.56	3559	0.001797	0.04312	0.16
1904247_Proteos_005.RAW	AF-M	Artificial Fingerprint	High	Sequest HT	Sequest HT (A2)	A	2	Unambiguous	QSLGHGQHGSGSGQSPSPSR	QSLGHGqHGSGSGqSPSPSR	Q7(Deamidated); Q14(Deamidated)	1	1	Q86YZ3	Q86YZ3	Hornerin OS=Homo sapiens OX=9606 GN=HRNR PE=1 SV=2	0	3	3	0.3287	0	1	1	1	650.628	1949.87	1949.87	0.46	0.0003	0	0	446514	HCD	MS2	7.89259	50	17.9338	4590	4590	4588	0/0		3.59	4617	0	0.001315	0.686
1904247_Proteos_005.RAW	AF-M	Artificial Fingerprint	High	Sequest HT	Sequest HT (A2)	A	2	Unambiguous	CEMEQQNQEYK	cEmEQQNQEYK	C1(Carbamidomethyl); M3(Oxidation)	2	2	P02533; Q04695	P02533; Q04695	Keratin, type I cytoskeletal 14 OS=Homo sapiens OX=9606 GN=KRT14 PE=1 SV=4; Keratin, type I cytoskeletal 17 OS=Homo sapiens OX=9606 GN=KRT17 PE=1 SV=2	0	2	2	0.2963	0	1	1	1	751.797	1502.59	1502.59	-0.62	-0.00046	0	0	171797	HCD	MS2	9.53232	50	17.9404	4595	4595	4588	0/0		2.16	1350	0	0.00266	0.58
1904247_Proteos_005.RAW	AF-M	Artificial Fingerprint	High	Sequest HT	Sequest HT (A2)	A	2	Unambiguous	GENALKDAK	GEnALKDAK	N3(Deamidated)	1	1	P04264	P04264	Keratin, type II cytoskeletal 1 OS=Homo sapiens OX=9606 GN=KRT1 PE=1 SV=6	1	2	2	0.4677	0	1	1	1	473.746	946.484	946.484	-0.26	-0.00013	0	0	1.25123e+06	HCD	MS2	28.1596	50	17.9613	4608	4608	4603	0/0		3.1	1024	0.00363	0.0706	0.084
1904247_Proteos_005.RAW	AF-M	Artificial Fingerprint	High	Sequest HT	Sequest HT (A2)	A	2	Unambiguous	FGQGAHHAAGQAGNEAGR	FGQGAHHAAGQAGNEAGR		1	1	Q6UWP8	Q6UWP8	Suprabasin OS=Homo sapiens OX=9606 GN=SBSN PE=1 SV=2	0	3	3	0.5121	0	1	1	1	579.272	1735.8	1735.8	0.14	8e-05	0	0	3.30182e+06	HCD	MS2	0.185179	29.311	17.9755	4616	4616	4613	0/0		4.53	3522	0.0007241	0.004281	0.508
1904247_Proteos_005.RAW	AF-M	Artificial Fingerprint	High	Sequest HT	Sequest HT (A2)	A	2	Unambiguous	HGSGSGHSSSYGQHGSGSGWSSSSGR	HGSGSGHSSSYGQHGSGSGWSSSSGR		1	1	Q86YZ3	Q86YZ3	Hornerin OS=Homo sapiens OX=9606 GN=HRNR PE=1 SV=2	0	5	5	0.1487	0	1	1	1	496.21	2477.02	2477.02	-0.34	-0.00017	0	0	727590	HCD	MS2	7.40384	50	17.9768	4617	4617	4613	0/0		3.43	5408	0.0007241	0.01514	0.318
1904247_Proteos_005.RAW	AF-M	Artificial Fingerprint	High	Sequest HT	Sequest HT (A2)	A	2	Unambiguous	HGSGSGHSSSYGQHGSGSGWSSSSGR	HGSGSGHSSSYGQHGSGSGWSSSSGR		1	1	Q86YZ3	Q86YZ3	Hornerin OS=Homo sapiens OX=9606 GN=HRNR PE=1 SV=2	0	2	2	0.6402	0	1	1	1	1239.01	2477.02	2477.02	0.64	0.00079	0	0	64640.2	HCD	MS2	0	50	18.0033	4634	4634	4626	0/0		3.53	5705	0.0007241	0.006975	0.435
1904247_Proteos_005.RAW	AF-M	Artificial Fingerprint	High	Sequest HT	Sequest HT (A2)	A	2	Unambiguous	FSSSGGGGGGGR	FSSSGGGGGGGR		1	1	P35527	P35527	Keratin, type I cytoskeletal 9 OS=Homo sapiens OX=9606 GN=KRT9 PE=1 SV=3	0	2	2	0.4311	0	1	1	1	491.721	982.434	982.434	0.07	3e-05	0	0	314311	HCD	MS2	76.1349	50	18.2189	4733	4733	4729	0/0		1.67	855	0.002625	0.0691	0.088
1904247_Proteos_005.RAW	AF-M	Artificial Fingerprint	High	Sequest HT	Sequest HT (A2)	A	2	Unambiguous	QAHLYR	QAHLYR		1	1	P14618	P14618	Pyruvate kinase PKM OS=Homo sapiens OX=9606 GN=PKM PE=1 SV=4	0	2	2	0.1972	0	1	1	1	394.214	787.421	787.421	-0.31	-0.00012	0	0	200540	HCD	MS2	12.079	50	18.2473	4745	4745	4741	0/0		1.42	620	0.002625	0.06181	0.105
1904247_Proteos_005.RAW	AF-M	Artificial Fingerprint	High	Sequest HT	Sequest HT (A2)	A	2	Unambiguous	HGSGSGHSSSYGQHGSGSGWSSSSGR	HGSGSGHSSSYGQHGSGSGWSSSSGR		1	1	Q86YZ3	Q86YZ3	Hornerin OS=Homo sapiens OX=9606 GN=HRNR PE=1 SV=2	0	4	4	0.3094	0	1	1	1	620.01	2477.02	2477.02	-0.41	-0.00025	0	0	190853	HCD	MS2	1.54549	50	18.373	4795	4795	4794	0/0		2.78	5412	0.002625	0.0659	0.095
1904247_Proteos_005.RAW	AF-M	Artificial Fingerprint	High	Sequest HT	Sequest HT (A2)	A	2	Unambiguous	NHEEEMNALR	NHEEEmNALR	M6(Oxidation)	2	2	P02533; Q04695	P02533; Q04695	Keratin, type I cytoskeletal 14 OS=Homo sapiens OX=9606 GN=KRT14 PE=1 SV=4; Keratin, type I cytoskeletal 17 OS=Homo sapiens OX=9606 GN=KRT17 PE=1 SV=2	0	2	2	0.1726	0	1	1	1	629.777	1258.55	1258.55	-1.3	-0.00082	0	0	398767	HCD	MS2	4.4923	50	18.4614	4847	4847	4837	0/0		1.97	1578	0.002625	0.05387	0.126
1904247_Proteos_005.RAW	AF-M	Artificial Fingerprint	High	Sequest HT	Sequest HT (A2)	A	2	Unambiguous	NHEEEMNALR	NHEEEmNALR	M6(Oxidation)	2	2	P02533; Q04695	P02533; Q04695	Keratin, type I cytoskeletal 14 OS=Homo sapiens OX=9606 GN=KRT14 PE=1 SV=4; Keratin, type I cytoskeletal 17 OS=Homo sapiens OX=9606 GN=KRT17 PE=1 SV=2	0	3	3	0.3909	0	1	1	1	420.187	1258.55	1258.55	-0.39	-0.00016	0	0	397572	HCD	MS2	21.7172	50	18.464	4849	4849	4837	0/0		2.43	1567	0.009708	0.1158	0.007
1904247_Proteos_005.RAW	AF-M	Artificial Fingerprint	High	Sequest HT	Sequest HT (A2)	A	2	Unambiguous	QETTHGQTINTTR	QETTHGQTINTTR		1	1	Q5D862	Q5D862	Filaggrin-2 OS=Homo sapiens OX=9606 GN=FLG2 PE=1 SV=1	0	3	3	0.3027	0	1	1	1	496.246	1486.72	1486.72	-0.8	-0.0004	0	0	169185	HCD	MS2	31.1638	50	18.4667	4851	4851	4837	0/0		2.61	2155	0.0007241	0.01597	0.31
1904247_Proteos_005.RAW	AF-M	Artificial Fingerprint	High	Sequest HT	Sequest HT (A2)	A	2	Unambiguous	GRHGSGSGQSSSYGPYR	GRHGSGSGQSSSYGPYR		1	1	Q86YZ3	Q86YZ3	Hornerin OS=Homo sapiens OX=9606 GN=HRNR PE=1 SV=2	1	4	4	0.5187	0	1	1	1	435.701	1739.78	1739.78	-0.98	-0.00042	0	0	406366	HCD	MS2	42.5891	50	18.4818	4860	4860	4853	0/0		3.47	3601	0.0007241	0.0231	0.255
1904247_Proteos_005.RAW	AF-M	Artificial Fingerprint	High	Sequest HT	Sequest HT (A2)	A	2	Unambiguous	GSRGGSGGSYGGGGSGGGYGGGSGSR	GSRGGSGGSYGGGGSGGGYGGGSGSR		1	1	P35527	P35527	Keratin, type I cytoskeletal 9 OS=Homo sapiens OX=9606 GN=KRT9 PE=1 SV=3	1	3	3	0.6124	0	1	1	1	697.966	2091.88	2091.88	0.29	0.0002	0	0	220872	HCD	MS2	13.7839	50	18.5343	4894	4894	4884	0/0		5.16	4545	0	1.673e-05	1.341
1904247_Proteos_005.RAW	AF-M	Artificial Fingerprint	High	Sequest HT	Sequest HT (A2)	A	2	Unambiguous	KYEDEINKR	KYEDEINKR		1	3	P35908	P35908; Q01546; P12035	Keratin, type II cytoskeletal 2 epidermal OS=Homo sapiens OX=9606 GN=KRT2 PE=1 SV=2; Keratin, type II cytoskeletal 2 oral OS=Homo sapiens OX=9606 GN=KRT76 PE=1 SV=2; Keratin, type II cytoskeletal 3 OS=Homo sapiens OX=9606 GN=KRT3 PE=1 SV=3	2	3	3	0.4858	0	1	1	1	398.875	1194.61	1194.61	0.34	0.00013	0	0	1.28555e+06	HCD	MS2	60.7593	26.465	18.8411	5015	5015	5014	0/0		3.52	1164	0	0.003086	0.558
1904247_Proteos_005.RAW	AF-M	Artificial Fingerprint	High	Sequest HT	Sequest HT (A2)	A	2	Unambiguous	STMQELNSR	STmQELNSR	M3(Oxidation)	1	1	P35527	P35527	Keratin, type I cytoskeletal 9 OS=Homo sapiens OX=9606 GN=KRT9 PE=1 SV=3	0	2	2	0.401	0	1	1	1	541.251	1081.49	1081.49	0.62	0.00034	0	0	22323244	HCD	MS2	0.600146	3.839	18.8502	5019	5019	5018	0/0		1.97	992	0.002625	0.04924	0.14
1904247_Proteos_005.RAW	AF-M	Artificial Fingerprint	High	Sequest HT	Sequest HT (A2)	A	2	Unambiguous	KYEDEINKR	KYEDEINKR		1	3	P35908	P35908; Q01546; P12035	Keratin, type II cytoskeletal 2 epidermal OS=Homo sapiens OX=9606 GN=KRT2 PE=1 SV=2; Keratin, type II cytoskeletal 2 oral OS=Homo sapiens OX=9606 GN=KRT76 PE=1 SV=2; Keratin, type II cytoskeletal 3 OS=Homo sapiens OX=9606 GN=KRT3 PE=1 SV=3	2	2	2	0.5392	0	1	1	1	597.808	1194.61	1194.61	-1.9	-0.00114	0	0	197480	HCD	MS2	10.0882	50	18.8519	5020	5020	5018	0/0		2.04	1306	0.0007241	0.004366	0.505
1904247_Proteos_005.RAW	AF-M	Artificial Fingerprint	High	Sequest HT	Sequest HT (A2)	A	2	Unambiguous	GSGGGSSGGSIGGR	GSGGGSSGGSIGGR		1	1	P04264	P04264	Keratin, type II cytoskeletal 1 OS=Homo sapiens OX=9606 GN=KRT1 PE=1 SV=6	0	2	2	0.6278	0	1	1	1	546.755	1092.5	1092.5	-0.54	-0.0003	0	0	446634	HCD	MS2	18.827	50	18.9221	5048	5048	5047	0/0		3.17	1101	0	6.182e-05	1.145
1904247_Proteos_005.RAW	AF-M	Artificial Fingerprint	High	Sequest HT	Sequest HT (A2)	A	2	Unambiguous	GPYESGSGHSSGLGHR	GPYESGSGHSSGLGHR		1	1	Q86YZ3	Q86YZ3	Hornerin OS=Homo sapiens OX=9606 GN=HRNR PE=1 SV=2	0	2	2	0.6278	0	1	1	1	792.861	1584.71	1584.71	-0.66	-0.00052	0	0	132364	HCD	MS2	9.23016	50	18.9761	5068	5068	5065	0/0		2.23	2911	0.002625	0.05466	0.124
1904247_Proteos_005.RAW	AF-M	Artificial Fingerprint	High	Sequest HT	Sequest HT (A2)	A	2	Unambiguous	GRPAVCQPQGR	GRPAVcQPQGR	C6(Carbamidomethyl)	1	1	Q5T749	Q5T749	Keratinocyte proline-rich protein OS=Homo sapiens OX=9606 GN=KPRP PE=1 SV=1	0	3	3	0.4982	0	1	1	1	409.212	1225.62	1225.62	0.21	9e-05	0	0	350771	HCD	MS2	28.2745	50	19.0141	5082	5082	5081	0/0		2.81	1316	0.0007241	0.01256	0.346
1904247_Proteos_005.RAW	AF-M	Artificial Fingerprint	High	Sequest HT	Sequest HT (A2)	A	2	Unambiguous	GPYESGSGHSSGLGHR	GPYESGSGHSSGLGHR		1	1	Q86YZ3	Q86YZ3	Hornerin OS=Homo sapiens OX=9606 GN=HRNR PE=1 SV=2	0	3	3	0.5108	0	1	1	1	528.91	1584.71	1584.71	-0.44	-0.00023	0	0	3.94736e+06	HCD	MS2	13.5571	25.388	19.0166	5084	5084	5081	0/0		4.64	2911	0	0.001524	0.664
1904247_Proteos_005.RAW	AF-M	Artificial Fingerprint	High	Sequest HT	Sequest HT (A2)	A	2	Unambiguous	GSGSGQSPSYGR	GSGSGqSPSYGR	Q6(Deamidated)	1	1	Q86YZ3	Q86YZ3	Hornerin OS=Homo sapiens OX=9606 GN=HRNR PE=1 SV=2	0	2	2	0.6226	0	1	1	1	570.749	1140.49	1140.49	-0.73	-0.00042	0	0	458988	HCD	MS2	6.90151	50	19.0659	5109	5109	5105	0/0		3.1	1152	0	0.002579	0.585
1904247_Proteos_005.RAW	AF-M	Artificial Fingerprint	High	Sequest HT	Sequest HT (A2)	A	2	Unambiguous	AAFGGSGGR	AAFGGSGGR		1	1	P35908	P35908	Keratin, type II cytoskeletal 2 epidermal OS=Homo sapiens OX=9606 GN=KRT2 PE=1 SV=2	0	2	2	0.4021	0	1	1	1	390.194	779.38	779.379	0.43	0.00017	0	0	1.68373e+06	HCD	MS2	12.0576	50	19.0878	5120	5120	5117	0/0		1.89	607	0.002625	0.05855	0.113
1904247_Proteos_005.RAW	AF-M	Artificial Fingerprint	High	Sequest HT	Sequest HT (A2)	A	2	Unambiguous	GPYESGSGHSSGLGHR	GPYESGSGHSSGLGHR		1	1	Q86YZ3	Q86YZ3	Hornerin OS=Homo sapiens OX=9606 GN=HRNR PE=1 SV=2	0	4	4	0.4985	0	1	1	1	396.934	1584.72	1584.71	0.56	0.00022	0	0	45924576	HCD	MS2	0.728918	2.234	19.1033	5129	5129	5126	0/0		3.35	3084	0.0007241	0.01281	0.344
1904247_Proteos_005.RAW	AF-M	Artificial Fingerprint	High	Sequest HT	Sequest HT (A2)	A	2	Unambiguous	TPEEVTR	TPEEVTR		1	1	P05089	P05089	Arginase-1 OS=Homo sapiens OX=9606 GN=ARG1 PE=1 SV=2	0	2	2	0.1053	0	1	1	1	416.214	831.42	831.421	-0.33	-0.00014	0	0	1.57845e+06	HCD	MS2	8.89101	38.657	19.1162	5136	5136	5135	0/0		1.52	843	0.002625	0.05474	0.124
1904247_Proteos_005.RAW	AF-M	Artificial Fingerprint	High	Sequest HT	Sequest HT (A2)	A	2	Unambiguous	HGSSSVELR	HGSSSVELR		1	1	Q5D862	Q5D862	Filaggrin-2 OS=Homo sapiens OX=9606 GN=FLG2 PE=1 SV=1	0	2	2	0.5267	0	1	1	1	486.249	971.49	971.49	-0.02	-1e-05	0	0	1.39134e+06	HCD	MS2	15.678	50	19.1425	5153	5153	5148	0/0		3	735	0.0007241	0.006607	0.443
1904247_Proteos_005.RAW	AF-M	Artificial Fingerprint	High	Sequest HT	Sequest HT (A2)	A	2	Unambiguous	ANSSATETINK	ANSSATETINK		1	1	P15924	P15924	Desmoplakin OS=Homo sapiens OX=9606 GN=DSP PE=1 SV=3	0	2	2	0.4078	0	1	1	1	568.283	1135.56	1135.56	-0.49	-0.00028	0	0	1.4659e+06	HCD	MS2	37.7057	44.074	19.185	5177	5177	5173	0/0		2.55	1242	0.001797	0.03042	0.213
1904247_Proteos_005.RAW	AF-M	Artificial Fingerprint	High	Sequest HT	Sequest HT (A2)	A	2	Unambiguous	FSSSGGGGGGGR	FSSSGGGGGGGR		1	1	P35527	P35527	Keratin, type I cytoskeletal 9 OS=Homo sapiens OX=9606 GN=KRT9 PE=1 SV=3	0	2	2	0.4703	0	1	1	1	491.721	982.434	982.434	0.19	9e-05	0	0	163265	HCD	MS2	52.9836	50	19.2308	5206	5206	5205	0/0		2.02	855	0.002625	0.04845	0.142
1904247_Proteos_005.RAW	AF-M	Artificial Fingerprint	High	Sequest HT	Sequest HT (A2)	A	2	Unambiguous	KLNVTEQEK	KLNVTEQEK		1	1	P06733	P06733	Alpha-enolase OS=Homo sapiens OX=9606 GN=ENO1 PE=1 SV=2	1	2	2	0.2745	0	1	1	1	544.801	1088.59	1088.59	0.03	2e-05	0	0	540911	HCD	MS2	15.3228	50	19.2585	5224	5224	5221	0/0		2.55	994	0.0007241	0.00856	0.404
1904247_Proteos_005.RAW	AF-M	Artificial Fingerprint	High	Sequest HT	Sequest HT (A2)	A	2	Unambiguous	DQYEQMAEK	DQYEQmAEK	M6(Oxidation)	1	1	P08779	P08779	Keratin, type I cytoskeletal 16 OS=Homo sapiens OX=9606 GN=KRT16 PE=1 SV=4	0	2	2	0.184	0	1	1	1	579.243	1157.48	1157.48	0.23	0.00013	0	0	673536	HCD	MS2	17.481	50	19.2796	5237	5237	5234	0/0		1.63	1047	0.002625	0.06739	0.092
1904247_Proteos_005.RAW	AF-M	Artificial Fingerprint	High	Sequest HT	Sequest HT (A2)	A	2	Unambiguous	TQETQEIR	TQETQEIR		1	1	Q8N1N4	Q8N1N4	Keratin, type II cytoskeletal 78 OS=Homo sapiens OX=9606 GN=KRT78 PE=1 SV=2	0	2	2	0.2028	0	1	1	1	502.754	1004.5	1004.5	0.43	0.00022	0	0	57107	HCD	MS2	41.7914	50	19.3559	5279	5279	5276	0/0		1.43	1073	0.0007241	0.02343	0.253
1904247_Proteos_005.RAW	AF-M	Artificial Fingerprint	High	Sequest HT	Sequest HT (A2)	A	2	Unambiguous	STMQELNSR	STmQELnSR	M3(Oxidation); N7(Deamidated)	1	1	P35527	P35527	Keratin, type I cytoskeletal 9 OS=Homo sapiens OX=9606 GN=KRT9 PE=1 SV=3	0	2	2	0.5284	0	1	1	1	541.741	1082.47	1082.48	-3.22	-0.00174	0	0	349656	HCD	MS2	31.8577	50	19.378	5290	5290	5287	0/0		2.29	1006	0.001797	0.03458	0.194
1904247_Proteos_005.RAW	AF-M	Artificial Fingerprint	High	Sequest HT	Sequest HT (A2)	A	2	Unambiguous	STMQELNSR	STmqELNSR	M3(Oxidation); Q4(Deamidated)	1	1	P35527	P35527	Keratin, type I cytoskeletal 9 OS=Homo sapiens OX=9606 GN=KRT9 PE=1 SV=3	0	2	2	0.5284	0	1	2	2	541.741	1082.47	1082.48	-3.22	-0.00174	0	0	349656	HCD	MS2	31.8577	50	19.378	5290	5290	5287	0/0		2.29	1006	0.001797	0.03601	0.188
1904247_Proteos_005.RAW	AF-M	Artificial Fingerprint	High	Sequest HT	Sequest HT (A2)	A	2	Unambiguous	GPYESGSGHSSGLGHQESR	GPYESGSGHSSGLGHQESR		1	1	Q86YZ3	Q86YZ3	Hornerin OS=Homo sapiens OX=9606 GN=HRNR PE=1 SV=2	0	3	3	0.2934	0	1	1	1	643.62	1928.85	1928.85	-0.65	-0.00042	0	0	53821.4	HCD	MS2	0	50	19.4353	5318	5318	5311	0/0		1.67	4666	0.00793	0.09729	0.034
1904247_Proteos_005.RAW	AF-M	Artificial Fingerprint	High	Sequest HT	Sequest HT (A2)	A	2	Unambiguous	YEDEINKR	YEDEINKR		5	11	P35908; P04264; P04259; A0A0S2Z428; P13647	Q7Z794; P35908; P04264; P04259; A0A0S2Z428; Q01546; O95678; P48668; P12035; P05787; P13647	Keratin, type II cytoskeletal 1b OS=Homo sapiens OX=9606 GN=KRT77 PE=2 SV=3; Keratin, type II cytoskeletal 2 epidermal OS=Homo sapiens OX=9606 GN=KRT2 PE=1 SV=2; Keratin, type II cytoskeletal 1 OS=Homo sapiens OX=9606 GN=KRT1 PE=1 SV=6; Keratin, type II cytoskeletal 6B OS=Homo sapiens OX=9606 GN=KRT6B PE=1 SV=5; HCG2039812 OS=Homo sapiens (Human) OX=9606 GN=KRT6A hCG_2039812; Keratin, type II cyt…	1	2	2	0.4779	0	1	1	1	533.762	1066.52	1066.52	0.27	0.00014	0	0	1.59359e+06	HCD	MS2	1.9995	50	19.4769	5338	5338	5337	0/0		2.49	1004	0.001797	0.0447	0.155
1904247_Proteos_005.RAW	AF-M	Artificial Fingerprint	High	Sequest HT	Sequest HT (A2)	A	2	Unambiguous	GPYESGSGHSSGLGHQESR	GPYESGSGHSSGLGHQESR		1	1	Q86YZ3	Q86YZ3	Hornerin OS=Homo sapiens OX=9606 GN=HRNR PE=1 SV=2	0	4	4	0.4953	0	1	1	1	482.968	1928.85	1928.85	0.19	9e-05	0	0	1.27949e+06	HCD	MS2	6.05609	50	19.489	5344	5344	5341	0/0		4.22	4664	0.0007241	0.01069	0.371
1904247_Proteos_005.RAW	AF-M	Artificial Fingerprint	High	Sequest HT	Sequest HT (A2)	A	2	Unambiguous	QSLDDAAK	QSLDDAAK		1	1	P15924	P15924	Desmoplakin OS=Homo sapiens OX=9606 GN=DSP PE=1 SV=3	0	2	2	0.3529	0	1	1	1	424.212	847.416	847.416	0.2	9e-05	0	0	368949	HCD	MS2	66.9478	50	19.5744	5390	5390	5389	0/0		1.87	753	0.001797	0.04389	0.157
1904247_Proteos_005.RAW	AF-M	Artificial Fingerprint	High	Sequest HT	Sequest HT (A2)	A	2	Unambiguous	NLHSEISGK	NLHSEISGK		1	1	P15924	P15924	Desmoplakin OS=Homo sapiens OX=9606 GN=DSP PE=1 SV=3	0	2	2	0.3139	0	1	1	1	492.759	984.512	984.511	0.83	0.00041	0	0	55901.4	HCD	MS2	55.6174	50	19.7362	5459	5459	5454	0/0		1.37	727	0.001797	0.03023	0.214
1904247_Proteos_005.RAW	AF-M	Artificial Fingerprint	High	Sequest HT	Sequest HT (A2)	A	2	Unambiguous	KYEDEINK	KYEDEINK		1	3	P35908	P35908; Q01546; P12035	Keratin, type II cytoskeletal 2 epidermal OS=Homo sapiens OX=9606 GN=KRT2 PE=1 SV=2; Keratin, type II cytoskeletal 2 oral OS=Homo sapiens OX=9606 GN=KRT76 PE=1 SV=2; Keratin, type II cytoskeletal 3 OS=Homo sapiens OX=9606 GN=KRT3 PE=1 SV=3	1	2	2	0.3783	0	1	1	1	519.759	1038.51	1038.51	0.32	0.00016	0	0	1.22408e+06	HCD	MS2	21.9971	50	19.78	5476	5476	5475	0/0		3.04	1076	0.001797	0.02983	0.216
1904247_Proteos_005.RAW	AF-M	Artificial Fingerprint	High	Sequest HT	Sequest HT (A2)	A	2	Unambiguous	ISEDKNPDYR	ISEDKNPDYR		1	1	P14923	P14923	Junction plakoglobin OS=Homo sapiens OX=9606 GN=JUP PE=1 SV=3	1	3	3	0.3757	0	1	1	1	412.867	1236.59	1236.59	0.18	7e-05	0	0	508745	HCD	MS2	13.0607	50	19.8095	5485	5485	5484	0/0		1.89	1349	0.001797	0.04082	0.168
1904247_Proteos_005.RAW	AF-M	Artificial Fingerprint	High	Sequest HT	Sequest HT (A2)	A	2	Unambiguous	HSSWSEGEEHGYSSGHSR	HSSWSEGEEHGYSSGHSR		1	1	Q5D862	Q5D862	Filaggrin-2 OS=Homo sapiens OX=9606 GN=FLG2 PE=1 SV=1	0	4	4	0.1078	0	1	1	1	504.711	2015.82	2015.82	0.05	3e-05	0	0	474825	HCD	MS2	13.9919	50	19.851	5504	5504	5502	0/0		2.32	3927	0.0007241	0.004751	0.493
1904247_Proteos_005.RAW	AF-M	Artificial Fingerprint	High	Sequest HT	Sequest HT (A2)	A	2	Unambiguous	AEENALQQK	AEENALQQK		1	1	P15924	P15924	Desmoplakin OS=Homo sapiens OX=9606 GN=DSP PE=1 SV=3	0	2	2	0.1847	0	1	1	1	515.762	1030.52	1030.52	-0.08	-4e-05	0	0	389768	HCD	MS2	40.8597	50	19.8524	5505	5505	5502	0/0		1.57	847	0.001797	0.0316	0.207
1904247_Proteos_005.RAW	AF-M	Artificial Fingerprint	High	Sequest HT	Sequest HT (A2)	A	2	Unambiguous	ISEDKNPDYR	ISEDKNPDYR		1	1	P14923	P14923	Junction plakoglobin OS=Homo sapiens OX=9606 GN=JUP PE=1 SV=3	1	2	2	0.4325	0	1	1	1	618.797	1236.59	1236.59	0.19	0.00012	0	0	238180	HCD	MS2	18.2169	50	19.8537	5506	5506	5502	0/0		2.52	1349	0.0007241	0.004507	0.501
1904247_Proteos_005.RAW	AF-M	Artificial Fingerprint	High	Sequest HT	Sequest HT (A2)	A	2	Unambiguous	KYEDEINKR	KYEDEInKR	N7(Deamidated)	1	3	P35908	P35908; Q01546; P12035	Keratin, type II cytoskeletal 2 epidermal OS=Homo sapiens OX=9606 GN=KRT2 PE=1 SV=2; Keratin, type II cytoskeletal 2 oral OS=Homo sapiens OX=9606 GN=KRT76 PE=1 SV=2; Keratin, type II cytoskeletal 3 OS=Homo sapiens OX=9606 GN=KRT3 PE=1 SV=3	2	3	3	0.3625	0	1	1	1	399.203	1195.59	1195.6	-1.81	-0.00072	0	0	437877	HCD	MS2	34.4523	50	19.8876	5523	5523	5520	0/0		2.51	1576	0.001797	0.03473	0.193
1904247_Proteos_005.RAW	AF-M	Artificial Fingerprint	High	Sequest HT	Sequest HT (A2)	A	2	Unambiguous	GSGGGSSGGSIGGR	GSGGGSSGGSIGGR		1	1	P04264	P04264	Keratin, type II cytoskeletal 1 OS=Homo sapiens OX=9606 GN=KRT1 PE=1 SV=6	0	2	2	0.5739	0	1	1	1	546.755	1092.5	1092.5	0.69	0.00037	0	0	220646	HCD	MS2	11.0947	50	19.9251	5539	5539	5538	0/0		2.3	1203	0.0007241	0.01626	0.308
1904247_Proteos_005.RAW	AF-M	Artificial Fingerprint	High	Sequest HT	Sequest HT (A2)	A	2	Unambiguous	GSGSGQSPSSGQHGTGFGR	GSGSGQSPSSGQHGTGFGR		1	1	Q86YZ3	Q86YZ3	Hornerin OS=Homo sapiens OX=9606 GN=HRNR PE=1 SV=2	0	3	3	0.3231	0	1	1	1	583.264	1747.78	1747.77	1.15	0.00067	0	0	120284	HCD	MS2	4.2409	50	19.949	5551	5551	5548	0/0		1.95	3829	0.001797	0.03437	0.195
1904247_Proteos_005.RAW	AF-M	Artificial Fingerprint	High	Sequest HT	Sequest HT (A2)	A	2	Unambiguous	FGQGVHHAAGQAGNEAGR	FGQGVHHAAGQAGNEAGR		1	1	Q6UWP8	Q6UWP8	Suprabasin OS=Homo sapiens OX=9606 GN=SBSN PE=1 SV=2	0	3	3	0.1698	0	1	1	1	588.616	1763.83	1763.83	0.53	0.00031	0	0	153562	HCD	MS2	6.19515	50	19.9621	5558	5558	5555	0/0		2.12	3401	0.001797	0.03237	0.204
1904247_Proteos_005.RAW	AF-M	Artificial Fingerprint	High	Sequest HT	Sequest HT (A2)	A	2	Unambiguous	GSGSGQSPSSGQHGTGFGR	GSGSGQSPSSGQHGTGFGR		1	1	Q86YZ3	Q86YZ3	Hornerin OS=Homo sapiens OX=9606 GN=HRNR PE=1 SV=2	0	2	2	0.6417	0	1	1	1	874.39	1747.77	1747.77	-0.31	-0.00027	0	0	85509.3	HCD	MS2	0	50	20.1037	5619	5619	5616	0/0		2.4	3743	0.001797	0.04256	0.162
1904247_Proteos_005.RAW	AF-M	Artificial Fingerprint	High	Sequest HT	Sequest HT (A2)	A	2	Unambiguous	YKQSLDDAAK	YKQSLDDAAK		1	1	P15924	P15924	Desmoplakin OS=Homo sapiens OX=9606 GN=DSP PE=1 SV=3	1	2	2	0.2712	0	1	1	1	569.791	1138.57	1138.57	0.55	0.00032	0	0	220674	HCD	MS2	40.4778	50	20.1193	5628	5628	5624	0/0		1.77	1306	0.001797	0.03701	0.183
1904247_Proteos_005.RAW	AF-M	Artificial Fingerprint	High	Sequest HT	Sequest HT (A2)	A	2	Unambiguous	NKYEDEINKR	NKYEDEInKR	N8(Deamidated)	4	6	P04264; P04259; A0A0S2Z428; P13647	P04264; P04259; A0A0S2Z428; P48668; P05787; P13647	Keratin, type II cytoskeletal 1 OS=Homo sapiens OX=9606 GN=KRT1 PE=1 SV=6; Keratin, type II cytoskeletal 6B OS=Homo sapiens OX=9606 GN=KRT6B PE=1 SV=5; HCG2039812 OS=Homo sapiens (Human) OX=9606 GN=KRT6A hCG_2039812; Keratin, type II cytoskeletal 6C OS=Homo sapiens OX=9606 GN=KRT6C PE=1 SV=3; Keratin, type II cytoskeletal 8 OS=Homo sapiens OX=9606 GN=KRT8 PE=1 SV=7; Keratin, type II cytoskeletal …	2	3	3	0.0132	0	1	1	1	437.217	1309.64	1309.64	-1.51	-0.00066	0	0	1.21279e+06	HCD	MS2	29.3189	31.314	20.1759	5653	5653	5650	0/0		3.78	1683	0.0007241	0.0205	0.273
1904247_Proteos_005.RAW	AF-M	Artificial Fingerprint	High	Sequest HT	Sequest HT (A2)	A	2	Unambiguous	NKYEDEINKR	nKYEDEINKR	N1(Deamidated)	4	6	P04264; P04259; A0A0S2Z428; P13647	P04264; P04259; A0A0S2Z428; P48668; P05787; P13647	Keratin, type II cytoskeletal 1 OS=Homo sapiens OX=9606 GN=KRT1 PE=1 SV=6; Keratin, type II cytoskeletal 6B OS=Homo sapiens OX=9606 GN=KRT6B PE=1 SV=5; HCG2039812 OS=Homo sapiens (Human) OX=9606 GN=KRT6A hCG_2039812; Keratin, type II cytoskeletal 6C OS=Homo sapiens OX=9606 GN=KRT6C PE=1 SV=3; Keratin, type II cytoskeletal 8 OS=Homo sapiens OX=9606 GN=KRT8 PE=1 SV=7; Keratin, type II cytoskeletal …	2	3	3		0.0132	2	2	2	437.217	1309.64	1309.64	-1.51	-0.00066	0	0	1.21279e+06	HCD	MS2	29.3189	31.314	20.1759	5653	5653	5650	0/0		3.73	1683	0.002625	0.05544	0.122
1904247_Proteos_005.RAW	AF-M	Artificial Fingerprint	High	Sequest HT	Sequest HT (A2)	A	2	Unambiguous	TVIAQHHVAPR	TVIAQHHVAPR		1	1	Q6ZVX7	Q6ZVX7	F-box only protein 50 OS=Homo sapiens OX=9606 GN=NCCRP1 PE=1 SV=1	0	3	3	0.3873	0	1	1	1	410.236	1228.69	1228.69	1	0.00041	0	0	168676	HCD	MS2	34.0284	50	20.2072	5668	5668	5666	0/0		2.84	730	0.0007241	0.02321	0.254
1904247_Proteos_005.RAW	AF-M	Artificial Fingerprint	High	Sequest HT	Sequest HT (A2)	A	2	Unambiguous	TVIAQHHVAPR	TVIAQHHVAPR		1	1	Q6ZVX7	Q6ZVX7	F-box only protein 50 OS=Homo sapiens OX=9606 GN=NCCRP1 PE=1 SV=1	0	2	2	0.5033	0	1	1	1	614.849	1228.69	1228.69	0.34	0.00021	0	0	70032.2	HCD	MS2	12.5969	50	20.2336	5678	5678	5676	0/0		1.53	706	0.001797	0.03811	0.179
1904247_Proteos_005.RAW	AF-M	Artificial Fingerprint	High	Sequest HT	Sequest HT (A2)	A	2	Unambiguous	NKYEDEINKR	NKYEDEInKR	N8(Deamidated)	4	6	P04264; P04259; A0A0S2Z428; P13647	P04264; P04259; A0A0S2Z428; P48668; P05787; P13647	Keratin, type II cytoskeletal 1 OS=Homo sapiens OX=9606 GN=KRT1 PE=1 SV=6; Keratin, type II cytoskeletal 6B OS=Homo sapiens OX=9606 GN=KRT6B PE=1 SV=5; HCG2039812 OS=Homo sapiens (Human) OX=9606 GN=KRT6A hCG_2039812; Keratin, type II cytoskeletal 6C OS=Homo sapiens OX=9606 GN=KRT6C PE=1 SV=3; Keratin, type II cytoskeletal 8 OS=Homo sapiens OX=9606 GN=KRT8 PE=1 SV=7; Keratin, type II cytoskeletal …	2	2	2	0.4405	0	1	1	1	655.323	1309.64	1309.64	0.16	0.0001	0	0	616501	HCD	MS2	17.2863	50	20.2915	5701	5701	5700	0/0		2.52	1784	0.0007241	0.0229	0.256
1904247_Proteos_005.RAW	AF-M	Artificial Fingerprint	High	Sequest HT	Sequest HT (A2)	A	2	Unambiguous	STMQELNSR	STmqELNSR	M3(Oxidation); Q4(Deamidated)	1	1	P35527	P35527	Keratin, type I cytoskeletal 9 OS=Homo sapiens OX=9606 GN=KRT9 PE=1 SV=3	0	2	2	0.0688	0	1	1	1	541.742	1082.48	1082.48	-1.64	-0.00089	0	0	824712	HCD	MS2	33.4199	50	20.3825	5738	5738	5737	0/0		1.89	968	0.002625	0.06499	0.097
1904247_Proteos_005.RAW	AF-M	Artificial Fingerprint	High	Sequest HT	Sequest HT (A2)	A	2	Unambiguous	NHYNEEMSNLR	NHYNEEmSNLR	M7(Oxidation)	1	1	P15924	P15924	Desmoplakin OS=Homo sapiens OX=9606 GN=DSP PE=1 SV=3	0	3	3	0.1214	0	1	1	1	474.874	1422.61	1422.61	-0.36	-0.00017	0	0	234801	HCD	MS2	48.3453	50	20.4913	5789	5789	5781	0/0		1.4	1842	0.004031	0.07589	0.073
1904247_Proteos_005.RAW	AF-M	Artificial Fingerprint	High	Sequest HT	Sequest HT (A2)	A	2	Unambiguous	GPYESGSGHSSGLGHQESR	GPYESGSGHSSGLGHqESR	Q16(Deamidated)	1	1	Q86YZ3	Q86YZ3	Hornerin OS=Homo sapiens OX=9606 GN=HRNR PE=1 SV=2	0	4	4	0.375	0	1	1	1	483.214	1929.83	1929.83	0.06	3e-05	0	0	200183	HCD	MS2	22.7168	50	20.5017	5794	5794	5793	0/0		2.64	4330	0	0.001942	0.627
1904247_Proteos_005.RAW	AF-M	Artificial Fingerprint	High	Sequest HT	Sequest HT (A2)	A	2	Unambiguous	NHYNEEMSNLR	NHYNEEmSNLR	M7(Oxidation)	1	1	P15924	P15924	Desmoplakin OS=Homo sapiens OX=9606 GN=DSP PE=1 SV=3	0	3	3	0.4088	0	1	1	1	474.873	1422.61	1422.61	-0.49	-0.00023	0	0	269707	HCD	MS2	37.3629	50	20.5242	5808	5808	5804	0/0		1.81	1845	0.001797	0.03935	0.174
1904247_Proteos_005.RAW	AF-M	Artificial Fingerprint	High	Sequest HT	Sequest HT (A2)	A	2	Unambiguous	NHEEEMKDLR	NHEEEMKDLR		1	1	P13645	P13645	Keratin, type I cytoskeletal 10 OS=Homo sapiens OX=9606 GN=KRT10 PE=1 SV=6	1	2	2	0.3374	0	1	1	1	650.802	1300.6	1300.6	1.87	0.00122	0	0	168064	HCD	MS2	13.0929	50	20.5867	5840	5840	5834	0/0		2.43	1783	0.007067	0.093	0.041
1904247_Proteos_005.RAW	AF-M	Artificial Fingerprint	High	Sequest HT	Sequest HT (A2)	A	2	Unambiguous	RSEPIYNSR	RSEPIYnSR	N7(Deamidated)	1	1	Q5T749	Q5T749	Keratinocyte proline-rich protein OS=Homo sapiens OX=9606 GN=KPRP PE=1 SV=1	1	2	2	0.4006	0	1	1	1	561.781	1122.55	1122.55	0.39	0.00022	0	0	1.82449e+06	HCD	MS2	0.670417	48.107	20.7617	5920	5920	5919	0/0		3.12	1120	0.0007241	0.01459	0.324
1904247_Proteos_005.RAW	AF-M	Artificial Fingerprint	High	Sequest HT	Sequest HT (A2)	A	2	Unambiguous	GSGGGSSGGSIGGR	GSGGGSSGGSIGGR		1	1	P04264	P04264	Keratin, type II cytoskeletal 1 OS=Homo sapiens OX=9606 GN=KRT1 PE=1 SV=6	0	2	2	0.4713	0	1	1	1	546.757	1092.51	1092.5	3.7	0.00202	0	0	148738	HCD	MS2	40.236	50	20.9646	6020	6020	6017	0/0		2.44	1149	0	0.0005549	0.815
1904247_Proteos_005.RAW	AF-M	Artificial Fingerprint	High	Sequest HT	Sequest HT (A2)	A	2	Unambiguous	KNHEEEMNALR	KNHEEEMNALR		2	2	P02533; Q04695	P02533; Q04695	Keratin, type I cytoskeletal 14 OS=Homo sapiens OX=9606 GN=KRT14 PE=1 SV=4; Keratin, type I cytoskeletal 17 OS=Homo sapiens OX=9606 GN=KRT17 PE=1 SV=2	1	3	3	0.3538	0	1	1	1	457.554	1370.65	1370.65	0.14	7e-05	0	0	938671	HCD	MS2	22.9998	50	21.0238	6042	6042	6041	0/0		3.25	2041	0.0007241	0.006931	0.436
1904247_Proteos_005.RAW	AF-M	Artificial Fingerprint	High	Sequest HT	Sequest HT (A2)	A	2	Unambiguous	GGSGGSYGGGGSGGGYGGGSGSR	GGSGGSYGGGGSGGGYGGGSGSR		1	1	P35527	P35527	Keratin, type I cytoskeletal 9 OS=Homo sapiens OX=9606 GN=KRT9 PE=1 SV=3	0	3	3	0.5101	0	1	1	1	597.914	1791.73	1791.73	0.16	0.0001	0	0	1.78424e+06	HCD	MS2	0.947868	42.999	21.0943	6074	6074	6071	0/0		3.47	2729	0.0007241	0.004103	0.515
1904247_Proteos_005.RAW	AF-M	Artificial Fingerprint	High	Sequest HT	Sequest HT (A2)	A	2	Unambiguous	NKYEDEINKR	NKYEDEInKR	N8(Deamidated)	4	6	P04264; P04259; A0A0S2Z428; P13647	P04264; P04259; A0A0S2Z428; P48668; P05787; P13647	Keratin, type II cytoskeletal 1 OS=Homo sapiens OX=9606 GN=KRT1 PE=1 SV=6; Keratin, type II cytoskeletal 6B OS=Homo sapiens OX=9606 GN=KRT6B PE=1 SV=5; HCG2039812 OS=Homo sapiens (Human) OX=9606 GN=KRT6A hCG_2039812; Keratin, type II cytoskeletal 6C OS=Homo sapiens OX=9606 GN=KRT6C PE=1 SV=3; Keratin, type II cytoskeletal 8 OS=Homo sapiens OX=9606 GN=KRT8 PE=1 SV=7; Keratin, type II cytoskeletal …	2	3	3	0.3293	0	1	1	1	437.217	1309.64	1309.64	-0.81	-0.00035	0	0	928152	HCD	MS2	4.04278	50	21.192	6133	6133	6132	0/0		2.46	1659	0.0007241	0.02389	0.25
1904247_Proteos_005.RAW	AF-M	Artificial Fingerprint	High	Sequest HT	Sequest HT (A2)	A	2	Unambiguous	KIVQLKPR	KIVQLKPR		1	1	P15924	P15924	Desmoplakin OS=Homo sapiens OX=9606 GN=DSP PE=1 SV=3	1	2	2	0.28	0	1	1	1	491.332	981.657	981.657	0.21	0.0001	0	0	428141	HCD	MS2	16.168	50	21.2062	6141	6141	6138	0/0		2.25	14	0.0007241	0.01051	0.373
1904247_Proteos_005.RAW	AF-M	Artificial Fingerprint	High	Sequest HT	Sequest HT (A2)	A	2	Unambiguous	SKEEAEALYHSK	SKEEAEALYHSK		1	1	P35908	P35908	Keratin, type II cytoskeletal 2 epidermal OS=Homo sapiens OX=9606 GN=KRT2 PE=1 SV=2	1	3	3	0.3626	0	1	1	1	464.565	1391.68	1391.68	-0.1	-5e-05	0	0	1.09723e+06	HCD	MS2	32.1121	50	21.2192	6148	6148	6145	0/0		2.62	1883	0.0007241	0.008329	0.408
1904247_Proteos_005.RAW	AF-M	Artificial Fingerprint	High	Sequest HT	Sequest HT (A2)	A	2	Unambiguous	LSPSPTSQR	LSPSPTSQR		1	1	P02545	P02545	Prelamin-A/C OS=Homo sapiens OX=9606 GN=LMNA PE=1 SV=1	0	2	2	0.3396	0	1	1	1	486.759	972.511	972.511	-0.1	-5e-05	0	0	228296	HCD	MS2	10.9335	50	21.3105	6195	6195	6194	0/0		1.59	695	0.002625	0.06695	0.093
1904247_Proteos_005.RAW	AF-M	Artificial Fingerprint	High	Sequest HT	Sequest HT (A2)	A	2	Unambiguous	NKYEDEINKR	NKYEDEINKR		4	6	P04264; P04259; A0A0S2Z428; P13647	P04264; P04259; A0A0S2Z428; P48668; P05787; P13647	Keratin, type II cytoskeletal 1 OS=Homo sapiens OX=9606 GN=KRT1 PE=1 SV=6; Keratin, type II cytoskeletal 6B OS=Homo sapiens OX=9606 GN=KRT6B PE=1 SV=5; HCG2039812 OS=Homo sapiens (Human) OX=9606 GN=KRT6A hCG_2039812; Keratin, type II cytoskeletal 6C OS=Homo sapiens OX=9606 GN=KRT6C PE=1 SV=3; Keratin, type II cytoskeletal 8 OS=Homo sapiens OX=9606 GN=KRT8 PE=1 SV=7; Keratin, type II cytoskeletal …	2	3	3	0.4718	0	1	1	1	436.89	1308.65	1308.65	-0.03	-2e-05	0	0	1.08948e+06	HCD	MS2	8.83391	43.756	21.3247	6203	6203	6200	0/0		3.37	1526	0.0007241	0.01699	0.301
1904247_Proteos_005.RAW	AF-M	Artificial Fingerprint	High	Sequest HT	Sequest HT (A2)	A	2	Unambiguous	NKYEDEINKR	NKYEDEINKR		4	6	P04264; P04259; A0A0S2Z428; P13647	P04264; P04259; A0A0S2Z428; P48668; P05787; P13647	Keratin, type II cytoskeletal 1 OS=Homo sapiens OX=9606 GN=KRT1 PE=1 SV=6; Keratin, type II cytoskeletal 6B OS=Homo sapiens OX=9606 GN=KRT6B PE=1 SV=5; HCG2039812 OS=Homo sapiens (Human) OX=9606 GN=KRT6A hCG_2039812; Keratin, type II cytoskeletal 6C OS=Homo sapiens OX=9606 GN=KRT6C PE=1 SV=3; Keratin, type II cytoskeletal 8 OS=Homo sapiens OX=9606 GN=KRT8 PE=1 SV=7; Keratin, type II cytoskeletal …	2	2	2	0.4679	0	1	1	1	654.83	1308.65	1308.65	-0.96	-0.00063	0	0	868800	HCD	MS2	6.79395	50	21.3662	6226	6226	6223	0/0		2.65	1400	0.001797	0.03177	0.207
1904247_Proteos_005.RAW	AF-M	Artificial Fingerprint	High	Sequest HT	Sequest HT (A2)	A	2	Unambiguous	QKVEEELNR	QKVEEELNR		1	1	P15924	P15924	Desmoplakin OS=Homo sapiens OX=9606 GN=DSP PE=1 SV=3	1	2	2	0.3014	0	1	1	1	572.802	1144.6	1144.6	0.28	0.00016	0	0	313819	HCD	MS2	42.9154	50	21.3715	6230	6230	6223	0/0		2.19	1195	0.0007241	0.009252	0.392
1904247_Proteos_005.RAW	AF-M	Artificial Fingerprint	High	Sequest HT	Sequest HT (A2)	A	2	Unambiguous	ANSSATETINK	AnSSATETINK	N2(Deamidated)	1	1	P15924	P15924	Desmoplakin OS=Homo sapiens OX=9606 GN=DSP PE=1 SV=3	0	2	2	0.3053	0	1	1	1	568.775	1136.54	1136.54	-0.39	-0.00022	0	0	249295	HCD	MS2	0	50	21.3804	6234	6234	6231	0/0		1.9	1195	0.0007241	0.00928	0.392
1904247_Proteos_005.RAW	AF-M	Artificial Fingerprint	High	Sequest HT	Sequest HT (A2)	A	2	Unambiguous	STMQELNSR	STmQELNSR	M3(Oxidation)	1	1	P35527	P35527	Keratin, type I cytoskeletal 9 OS=Homo sapiens OX=9606 GN=KRT9 PE=1 SV=3	0	2	2	0.4611	0	1	1	1	541.252	1081.5	1081.49	2.2	0.00119	0	0	634581	HCD	MS2	44.9344	50	21.3893	6238	6238	6237	0/0		1.93	1062	0.001797	0.04592	0.151
1904247_Proteos_005.RAW	AF-M	Artificial Fingerprint	High	Sequest HT	Sequest HT (A2)	A	2	Unambiguous	SSYSRFSSSGGGGGGGR	SSYSRFSSSGGGGGGGR		1	1	P35527	P35527	Keratin, type I cytoskeletal 9 OS=Homo sapiens OX=9606 GN=KRT9 PE=1 SV=3	1	3	3	0.4741	0	1	1	1	521.57	1562.7	1562.69	0.92	0.00048	0	0	1.34364e+06	HCD	MS2	30.6649	50	21.3919	6240	6240	6237	0/0		4.24	2907	0	0.002038	0.62
1904247_Proteos_005.RAW	AF-M	Artificial Fingerprint	High	Sequest HT	Sequest HT (A2)	A	2	Unambiguous	NHEEEMKDLR	NHEEEMKDLR		1	1	P13645	P13645	Keratin, type I cytoskeletal 10 OS=Homo sapiens OX=9606 GN=KRT10 PE=1 SV=6	1	3	3	0.2755	0	1	1	1	434.204	1300.6	1300.6	2.17	0.00094	0	0	210902	HCD	MS2	0	50	21.464	6274	6274	6273	0/0		1.96	1839	0.0007241	0.01577	0.312
1904247_Proteos_005.RAW	AF-M	Artificial Fingerprint	High	Sequest HT	Sequest HT (A2)	A	2	Unambiguous	QKVEEELNR	QKVEEELNR		1	1	P15924	P15924	Desmoplakin OS=Homo sapiens OX=9606 GN=DSP PE=1 SV=3	1	3	3	0.2941	0	1	1	1	382.204	1144.6	1144.6	1.33	0.00051	0	0	438335	HCD	MS2	0	50	21.4657	6275	6275	6273	0/0		2.04	1183	0.002625	0.0563	0.119
1904247_Proteos_005.RAW	AF-M	Artificial Fingerprint	High	Sequest HT	Sequest HT (A2)	A	2	Unambiguous	SKAEAESLYQSK	SKAEAESLYQSK		1	1	P04264	P04264	Keratin, type II cytoskeletal 1 OS=Homo sapiens OX=9606 GN=KRT1 PE=1 SV=6	1	2	2	0.4183	0	1	1	1	670.839	1340.67	1340.67	0.46	0.00031	0	0	265585	HCD	MS2	0	50	21.4959	6284	6284	6283	0/0		2.08	1822	0.002625	0.05079	0.135
1904247_Proteos_005.RAW	AF-M	Artificial Fingerprint	High	Sequest HT	Sequest HT (A2)	A	2	Unambiguous	YEVTSGGGGTSR	YEVTSGGGGTSR		1	1	P15924	P15924	Desmoplakin OS=Homo sapiens OX=9606 GN=DSP PE=1 SV=3	0	2	2	0.4558	0	1	1	1	585.773	1170.54	1170.54	0.37	0.00022	0	0	540935	HCD	MS2	2.97819	50	21.7607	6367	6367	6366	0/0		2.26	1654	0.0007241	0.0203	0.274
1904247_Proteos_005.RAW	AF-M	Artificial Fingerprint	High	Sequest HT	Sequest HT (A2)	A	2	Unambiguous	GGSISGGGYGSGGGK	GGSISGGGYGSGGGK		1	1	P35908	P35908	Keratin, type II cytoskeletal 2 epidermal OS=Homo sapiens OX=9606 GN=KRT2 PE=1 SV=2	0	2	2	0.5079	0	1	1	1	599.278	1197.55	1197.55	-0.08	-5e-05	0	0	172720	HCD	MS2	5.27992	50	21.8311	6391	6391	6390	0/0		1.89	1582	0.0007241	0.02623	0.235
1904247_Proteos_005.RAW	AF-M	Artificial Fingerprint	High	Sequest HT	Sequest HT (A2)	A	2	Unambiguous	LGHGVNNAAGQVGK	LGHGVNNAAGQVGK		1	1	Q6UWP8	Q6UWP8	Suprabasin OS=Homo sapiens OX=9606 GN=SBSN PE=1 SV=2	0	3	3	0.1736	0	1	1	1	441.237	1321.7	1321.7	-0.3	-0.00013	0	0	517141	HCD	MS2	48.1569	50	21.8714	6406	6406	6403	0/0		2.42	1185	0.0007241	0.01595	0.311
1904247_Proteos_005.RAW	AF-M	Artificial Fingerprint	High	Sequest HT	Sequest HT (A2)	A	2	Unambiguous	RSEPIYNSR	RSEPIYnSR	N7(Deamidated)	1	1	Q5T749	Q5T749	Keratinocyte proline-rich protein OS=Homo sapiens OX=9606 GN=KPRP PE=1 SV=1	1	2	2	0.4642	0	1	1	1	561.781	1122.55	1122.55	0.39	0.00022	0	0	1.1597e+06	HCD	MS2	17.2406	50	21.8998	6422	6422	6417	0/0		3.21	1120	0.0007241	0.007399	0.426
1904247_Proteos_005.RAW	AF-M	Artificial Fingerprint	High	Sequest HT	Sequest HT (A2)	A	2	Unambiguous	GSSSGGGYSSGSSSYGSGGR	GSSSGGGYSSGSSSYGSGGR		1	1	P35908	P35908	Keratin, type II cytoskeletal 2 epidermal OS=Homo sapiens OX=9606 GN=KRT2 PE=1 SV=2	0	3	3	0.3	0	1	1	1	580.906	1740.7	1740.71	-0.37	-0.00021	0	0	342504	HCD	MS2	0	50	21.9194	6434	6434	6430	0/0		2.2	2448	0.002625	0.06852	0.089
1904247_Proteos_005.RAW	AF-M	Artificial Fingerprint	High	Sequest HT	Sequest HT (A2)	A	2	Unambiguous	GGSGGSYGGGGSGGGYGGGSGSR	GGSGGSYGGGGSGGGYGGGSGSR		1	1	P35527	P35527	Keratin, type I cytoskeletal 9 OS=Homo sapiens OX=9606 GN=KRT9 PE=1 SV=3	0	2	2	0.7048	0	1	1	1	896.367	1791.73	1791.73	-0.2	-0.00018	0	0	1.55205e+06	HCD	MS2	0	50	21.9377	6445	6445	6444	0/0		4.81	2635	0	3.105e-05	1.249
1904247_Proteos_005.RAW	AF-M	Artificial Fingerprint	High	Sequest HT	Sequest HT (A2)	A	2	Unambiguous	SSGFAQHEYR	SSGFAQHEYR		1	1	Q5D862	Q5D862	Filaggrin-2 OS=Homo sapiens OX=9606 GN=FLG2 PE=1 SV=1	0	3	3	0.4586	0	1	1	1	394.516	1181.53	1181.53	0.47	0.00019	0	0	736588	HCD	MS2	32.1459	50	21.9417	6448	6448	6444	0/0		2.66	1220	0.002625	0.04864	0.142
1904247_Proteos_005.RAW	AF-M	Artificial Fingerprint	High	Sequest HT	Sequest HT (A2)	A	2	Unambiguous	SSGFAQHEYR	SSGFAQHEYR		1	1	Q5D862	Q5D862	Filaggrin-2 OS=Homo sapiens OX=9606 GN=FLG2 PE=1 SV=1	0	2	2	0.4832	0	1	1	1	591.271	1181.53	1181.53	1.1	0.00065	0	0	217016	HCD	MS2	21.5543	50	21.9457	6451	6451	6444	0/0		2.38	1325	0.0007241	0.003962	0.52
1904247_Proteos_005.RAW	AF-M	Artificial Fingerprint	High	Sequest HT	Sequest HT (A2)	A	2	Unambiguous	QFTSSSSMK	QFTSSSSMK		2	2	P02533; P08779	P02533; P08779	Keratin, type I cytoskeletal 14 OS=Homo sapiens OX=9606 GN=KRT14 PE=1 SV=4; Keratin, type I cytoskeletal 16 OS=Homo sapiens OX=9606 GN=KRT16 PE=1 SV=4	0	2	2	0.3568	0	1	1	1	501.732	1002.46	1002.46	0.03	2e-05	0	0	436316	HCD	MS2	25.0353	50	21.9666	6464	6464	6459	0/0		2.13	935	0.001797	0.04069	0.169
1904247_Proteos_005.RAW	AF-M	Artificial Fingerprint	High	Sequest HT	Sequest HT (A2)	A	2	Unambiguous	GSSSGGGYSSGSSSYGSGGR	GSSSGGGYSSGSSSYGSGGR		1	1	P35908	P35908	Keratin, type II cytoskeletal 2 epidermal OS=Homo sapiens OX=9606 GN=KRT2 PE=1 SV=2	0	2	2	0.6215	0	1	1	1	870.855	1740.7	1740.71	-2.01	-0.00175	0	0	122443	HCD	MS2	0	50	22.1524	6555	6555	6554	0/0		1.77	2338	0.006757	0.0896	0.047
1904247_Proteos_005.RAW	AF-M	Artificial Fingerprint	High	Sequest HT	Sequest HT (A2)	A	2	Unambiguous	DVDGAYMTK	DVDGAYmTK	M7(Oxidation)	1	1	P04264	P04264	Keratin, type II cytoskeletal 1 OS=Homo sapiens OX=9606 GN=KRT1 PE=1 SV=6	0	2	2	0.3103	0	1	1	1	508.224	1015.44	1015.44	0.86	0.00044	0	0	745843	HCD	MS2	7.29014	50	22.2712	6591	6591	6590	0/0		1.45	920	0.002625	0.06826	0.09
1904247_Proteos_005.RAW	AF-M	Artificial Fingerprint	High	Sequest HT	Sequest HT (A2)	A	2	Unambiguous	NKYEDEINKR	NKYEDEINKR		4	6	P04264; P04259; A0A0S2Z428; P13647	P04264; P04259; A0A0S2Z428; P48668; P05787; P13647	Keratin, type II cytoskeletal 1 OS=Homo sapiens OX=9606 GN=KRT1 PE=1 SV=6; Keratin, type II cytoskeletal 6B OS=Homo sapiens OX=9606 GN=KRT6B PE=1 SV=5; HCG2039812 OS=Homo sapiens (Human) OX=9606 GN=KRT6A hCG_2039812; Keratin, type II cytoskeletal 6C OS=Homo sapiens OX=9606 GN=KRT6C PE=1 SV=3; Keratin, type II cytoskeletal 8 OS=Homo sapiens OX=9606 GN=KRT8 PE=1 SV=7; Keratin, type II cytoskeletal …	2	3	3	0.4088	0	1	1	1	436.89	1308.65	1308.65	-0.03	-2e-05	0	0	1.54211e+06	HCD	MS2	0	42.076	22.331	6611	6611	6610	0/0		2.96	1526	0.0007241	0.01236	0.349
1904247_Proteos_005.RAW	AF-M	Artificial Fingerprint	High	Sequest HT	Sequest HT (A2)	A	2	Unambiguous	STMQELNSR	STmQELNSR	M3(Oxidation)	1	1	P35527	P35527	Keratin, type I cytoskeletal 9 OS=Homo sapiens OX=9606 GN=KRT9 PE=1 SV=3	0	2	2	0.3491	0	1	1	1	541.251	1081.49	1081.49	0.51	0.00027	0	0	468685	HCD	MS2	38.1904	50	22.3955	6629	6629	6628	0/0		1.69	992	0.0007241	0.02493	0.243
1904247_Proteos_005.RAW	AF-M	Artificial Fingerprint	High	Sequest HT	Sequest HT (A2)	A	2	Unambiguous	NHEEEMKDLR	NHEEEMKDLR		1	1	P13645	P13645	Keratin, type I cytoskeletal 10 OS=Homo sapiens OX=9606 GN=KRT10 PE=1 SV=6	1	3	3	0.246	0	1	1	1	434.203	1300.6	1300.6	0.48	0.00021	0	0	351585	HCD	MS2	28.022	50	22.4748	6657	6657	6656	0/0		1.87	1885	0.001797	0.03478	0.193
1904247_Proteos_005.RAW	AF-M	Artificial Fingerprint	High	Sequest HT	Sequest HT (A2)	A	2	Unambiguous	ETQSQLETER	ETQSQLETER		1	1	P15924	P15924	Desmoplakin OS=Homo sapiens OX=9606 GN=DSP PE=1 SV=3	0	2	2	0.3046	0	1	1	1	610.792	1220.58	1220.58	0.92	0.00056	0	0	111172	HCD	MS2	24.574	50	22.6728	6718	6718	6717	0/0		1.74	1381	0.0007241	0.01888	0.285
1904247_Proteos_005.RAW	AF-M	Artificial Fingerprint	High	Sequest HT	Sequest HT (A2)	A	2	Unambiguous	FSSSSGYGGGSSR	FSSSSGYGGGSSR		1	1	P35527	P35527	Keratin, type I cytoskeletal 9 OS=Homo sapiens OX=9606 GN=KRT9 PE=1 SV=3	0	2	2	0.466	0	1	1	1	618.268	1235.53	1235.53	0.21	0.00013	0	0	4.15626e+06	HCD	MS2	0	27.922	22.6895	6724	6724	6723	0/0		2.94	1294	0	0.002623	0.582
1904247_Proteos_005.RAW	AF-M	Artificial Fingerprint	High	Sequest HT	Sequest HT (A2)	A	2	Unambiguous	VGEFSGANK	VGEFSGANK		1	1	P10599	P10599	Thioredoxin OS=Homo sapiens OX=9606 GN=TXN PE=1 SV=3	0	2	2	0.3727	0	1	1	1	454.727	908.447	908.447	0.03	2e-05	0	0	1.19851e+06	HCD	MS2	6.82504	50	22.8185	6773	6773	6772	0/0		2.2	803	0.0007241	0.01908	0.283
1904247_Proteos_005.RAW	AF-M	Artificial Fingerprint	High	Sequest HT	Sequest HT (A2)	A	2	Unambiguous	KQLEQLQGER	KQLEQLQGER		1	1	Q8N1N4	Q8N1N4	Keratin, type II cytoskeletal 78 OS=Homo sapiens OX=9606 GN=KRT78 PE=1 SV=2	1	2	2	0.1572	0	1	1	1	614.835	1228.66	1228.66	-1.05	-0.00065	0	0	86839.6	HCD	MS2	40.7631	50	22.8915	6811	6811	6807	0/0		1.59	827	0.003126	0.06944	0.087
1904247_Proteos_005.RAW	AF-M	Artificial Fingerprint	High	Sequest HT	Sequest HT (A2)	A	2	Unambiguous	KLLEGEECR	KLLEGEEcR	C8(Carbamidomethyl)	4	10	P35908; P04259; A0A0S2Z428; P13647	Q7RTS7; Q86Y46; P35908; P04259; A0A0S2Z428; Q01546; O95678; P48668; P12036; P13647	Keratin, type II cytoskeletal 74 OS=Homo sapiens OX=9606 GN=KRT74 PE=1 SV=2; Keratin, type II cytoskeletal 73 OS=Homo sapiens OX=9606 GN=KRT73 PE=1 SV=1; Keratin, type II cytoskeletal 2 epidermal OS=Homo sapiens OX=9606 GN=KRT2 PE=1 SV=2; Keratin, type II cytoskeletal 6B OS=Homo sapiens OX=9606 GN=KRT6B PE=1 SV=5; HCG2039812 OS=Homo sapiens (Human) OX=9606 GN=KRT6A hCG_2039812; Keratin, type II c…	1	2	2	0.243	0	1	1	1	567.285	1133.56	1133.56	0.43	0.00025	0	0	229082	HCD	MS2	0	50	22.9324	6832	6832	6829	0/0		2.14	1259	0.0007241	0.01939	0.281
1904247_Proteos_005.RAW	AF-M	Artificial Fingerprint	High	Sequest HT	Sequest HT (A2)	A	2	Unambiguous	GGSGGSYGGGGSGGGYGGGSGSR	GGSGGSYGGGGSGGGYGGGSGSR		1	1	P35527	P35527	Keratin, type I cytoskeletal 9 OS=Homo sapiens OX=9606 GN=KRT9 PE=1 SV=3	0	2	2	0.6706	0	1	1	1	896.367	1791.73	1791.73	-0.88	-0.00079	0	0	192655	HCD	MS2	0	50	22.9428	6837	6837	6836	0/0		3.4	2699	0	0.0007419	0.772
1904247_Proteos_005.RAW	AF-M	Artificial Fingerprint	High	Sequest HT	Sequest HT (A2)	A	2	Unambiguous	KDVDGAYMTK	KDVDGAYMTK		1	1	P04264	P04264	Keratin, type II cytoskeletal 1 OS=Homo sapiens OX=9606 GN=KRT1 PE=1 SV=6	1	2	2	0.3115	0	1	1	1	564.274	1127.54	1127.54	0.06	4e-05	0	0	594510	HCD	MS2	3.40041	50	23.2315	6987	6987	6986	0/0		3.05	1518	0.0007241	0.01103	0.366
1904247_Proteos_005.RAW	AF-M	Artificial Fingerprint	High	Sequest HT	Sequest HT (A2)	A	2	Unambiguous	SSSSGQHGSGLGESSGFGHHESSSGQSSSYSQHGSGSGHSSGYGQHGSR	SSSSGQHGSGLGESSGFGHHESSSGqSSSYSQHGSGSGHSSGYGQHGSR	Q26(Deamidated)	1	1	Q86YZ3	Q86YZ3	Hornerin OS=Homo sapiens OX=9606 GN=HRNR PE=1 SV=2	0	5	5	0.0025	0	1	1	1	950.798	4749.96	4749.94	4.01	0.00381	0	0	276095	HCD	MS2	0	50	23.2606	7003	7003	6999	0/0		4.04	6831	0.0007241	0.003391	0.543
1904247_Proteos_005.RAW	AF-M	Artificial Fingerprint	High	Sequest HT	Sequest HT (A2)	A	2	Unambiguous	SSSSGQHGSGLGESSGFGHHESSSGQSSSYSQHGSGSGHSSGYGQHGSR	SSSSGQHGSGLGESSGFGHHESSSGQSSSYSqHGSGSGHSSGYGQHGSR	Q32(Deamidated)	1	1	Q86YZ3	Q86YZ3	Hornerin OS=Homo sapiens OX=9606 GN=HRNR PE=1 SV=2	0	5	5		0.0025	2	2	2	950.798	4749.96	4749.94	4.01	0.00381	0	0	276095	HCD	MS2	0	50	23.2606	7003	7003	6999	0/0		4.03	6831	0.0007241	0.006883	0.437
1904247_Proteos_005.RAW	AF-M	Artificial Fingerprint	High	Sequest HT	Sequest HT (A2)	A	2	Unambiguous	SSSSGQHGSGLGESSGFGHHESSSGQSSSYSQHGSGSGHSSGYGQHGSR	SSSSGQHGSGLGESSGFGHHESSSGQSSSYSQHGSGSGHSSGYGqHGSR	Q45(Deamidated)	1	1	Q86YZ3	Q86YZ3	Hornerin OS=Homo sapiens OX=9606 GN=HRNR PE=1 SV=2	0	5	5		0.0297	3	3	3	950.798	4749.96	4749.94	4.01	0.00381	0	0	276095	HCD	MS2	0	50	23.2606	7003	7003	6999	0/0		3.92	6831	0.00793	0.09842	0.033
1904247_Proteos_005.RAW	AF-M	Artificial Fingerprint	High	Sequest HT	Sequest HT (A2)	A	2	Unambiguous	NKYEDEINKR	NKYEDEInKR	N8(Deamidated)	4	6	P04264; P04259; A0A0S2Z428; P13647	P04264; P04259; A0A0S2Z428; P48668; P05787; P13647	Keratin, type II cytoskeletal 1 OS=Homo sapiens OX=9606 GN=KRT1 PE=1 SV=6; Keratin, type II cytoskeletal 6B OS=Homo sapiens OX=9606 GN=KRT6B PE=1 SV=5; HCG2039812 OS=Homo sapiens (Human) OX=9606 GN=KRT6A hCG_2039812; Keratin, type II cytoskeletal 6C OS=Homo sapiens OX=9606 GN=KRT6C PE=1 SV=3; Keratin, type II cytoskeletal 8 OS=Homo sapiens OX=9606 GN=KRT8 PE=1 SV=7; Keratin, type II cytoskeletal …	2	3	3	0.097	0	1	1	1	437.218	1309.64	1309.64	0.1	4e-05	0	0	10865034	HCD	MS2	8.87652	5.77	23.3384	7033	7033	7032	0/0		2.99	1797	0.001797	0.03077	0.211
1904247_Proteos_005.RAW	AF-M	Artificial Fingerprint	High	Sequest HT	Sequest HT (A2)	A	2	Unambiguous	NQCTQVVQER	NQcTQVVQER	C3(Carbamidomethyl)	1	1	P15924	P15924	Desmoplakin OS=Homo sapiens OX=9606 GN=DSP PE=1 SV=3	0	2	2	0.4301	0	1	1	1	631.302	1261.6	1261.6	1.76	0.00111	0	0	49690.3	HCD	MS2	0	50	23.3635	7045	7045	7043	0/0		1.93	1624	0.0007241	0.01339	0.337
1904247_Proteos_005.RAW	AF-M	Artificial Fingerprint	High	Sequest HT	Sequest HT (A2)	A	2	Unambiguous	STMQELNSR	STmqELNSR	M3(Oxidation); Q4(Deamidated)	1	1	P35527	P35527	Keratin, type I cytoskeletal 9 OS=Homo sapiens OX=9606 GN=KRT9 PE=1 SV=3	0	2	2	0.0585	0	1	1	1	541.742	1082.48	1082.48	-0.63	-0.00034	0	0	444928	HCD	MS2	37.4977	50	23.4067	7061	7061	7060	0/0		1.71	969	0.004031	0.07557	0.074
1904247_Proteos_005.RAW	AF-M	Artificial Fingerprint	High	Sequest HT	Sequest HT (A2)	A	2	Unambiguous	EGIPPDQQR	EGIPPDQQR		1	5	A0A2R8Y422	A0A2R8Y422; P62987; P62979; P0CG47; P0CG48	Uncharacterized protein OS=Homo sapiens OX=9606 PE=4 SV=1; Ubiquitin-60S ribosomal protein L40 OS=Homo sapiens OX=9606 GN=UBA52 PE=1 SV=2; Ubiquitin-40S ribosomal protein S27a OS=Homo sapiens OX=9606 GN=RPS27A PE=1 SV=2; Polyubiquitin-B OS=Homo sapiens OX=9606 GN=UBB PE=1 SV=1; Polyubiquitin-C OS=Homo sapiens OX=9606 GN=UBC PE=1 SV=3	0	2	2	0.285	0	1	1	1	520.264	1039.52	1039.52	4.42	0.00229	0	0	147610	HCD	MS2	53.3462	50	23.4379	7072	7072	7071	0/0		1.93	1189	0.001797	0.04238	0.163
1904247_Proteos_005.RAW	AF-M	Artificial Fingerprint	High	Sequest HT	Sequest HT (A2)	A	2	Unambiguous	LNVTEQEK	LNVTEQEK		1	1	P06733	P06733	Alpha-enolase OS=Homo sapiens OX=9606 GN=ENO1 PE=1 SV=2	0	2	2	0.2133	0	1	1	1	480.754	960.5	960.5	0.29	0.00014	0	0	307822	HCD	MS2	2.89062	50	23.5465	7123	7123	7122	0/0		1.5	1034	0.0007241	0.02033	0.274
1904247_Proteos_005.RAW	AF-M	Artificial Fingerprint	High	Sequest HT	Sequest HT (A2)	A	2	Unambiguous	NKYEDEINKR	nKYEDEINKR	N1(Deamidated)	4	6	P04264; P04259; A0A0S2Z428; P13647	P04264; P04259; A0A0S2Z428; P48668; P05787; P13647	Keratin, type II cytoskeletal 1 OS=Homo sapiens OX=9606 GN=KRT1 PE=1 SV=6; Keratin, type II cytoskeletal 6B OS=Homo sapiens OX=9606 GN=KRT6B PE=1 SV=5; HCG2039812 OS=Homo sapiens (Human) OX=9606 GN=KRT6A hCG_2039812; Keratin, type II cytoskeletal 6C OS=Homo sapiens OX=9606 GN=KRT6C PE=1 SV=3; Keratin, type II cytoskeletal 8 OS=Homo sapiens OX=9606 GN=KRT8 PE=1 SV=7; Keratin, type II cytoskeletal …	2	2	2	0.0648	0	1	1	1	655.322	1309.64	1309.64	-1.06	-0.00069	0	0	382711	HCD	MS2	27.9657	50	23.5634	7129	7129	7128	0/0		2.93	1667	0.0007241	0.01828	0.29
1904247_Proteos_005.RAW	AF-M	Artificial Fingerprint	High	Sequest HT	Sequest HT (A2)	A	2	Unambiguous	SSGFAQHEYR	SSGFAqHEYR	Q6(Deamidated)	1	1	Q5D862	Q5D862	Filaggrin-2 OS=Homo sapiens OX=9606 GN=FLG2 PE=1 SV=1	0	2	2	0.4903	0	1	1	1	591.763	1182.52	1182.52	1.3	0.00077	0	0	286918	HCD	MS2	44.9467	50	23.5792	7138	7138	7135	0/0		2.06	1356	0.001797	0.03539	0.19
1904247_Proteos_005.RAW	AF-M	Artificial Fingerprint	High	Sequest HT	Sequest HT (A2)	A	2	Unambiguous	CEMEQQNQEYK	cEMEQQNQEYK	C1(Carbamidomethyl)	2	2	P02533; Q04695	P02533; Q04695	Keratin, type I cytoskeletal 14 OS=Homo sapiens OX=9606 GN=KRT14 PE=1 SV=4; Keratin, type I cytoskeletal 17 OS=Homo sapiens OX=9606 GN=KRT17 PE=1 SV=2	0	2	2	0.604	0	1	1	1	743.8	1486.59	1486.59	-0.35	-0.00026	0	0	291976	HCD	MS2	0	50	23.5923	7145	7145	7142	0/0		2.98	1483	0	0.0005449	0.818
1904247_Proteos_005.RAW	AF-M	Artificial Fingerprint	High	Sequest HT	Sequest HT (A2)	A	2	Unambiguous	EVFTSSSSSSSR	EVFTSSSSSSSR		1	1	P08779	P08779	Keratin, type I cytoskeletal 16 OS=Homo sapiens OX=9606 GN=KRT16 PE=1 SV=4	0	2	2	0.4887	0	1	1	1	630.789	1260.57	1260.57	0.09	6e-05	0	0	2.5203e+06	HCD	MS2	45.8332	44.456	23.6933	7197	7197	7193	0/0		2.66	1719	0.0007241	0.01159	0.359
1904247_Proteos_005.RAW	AF-M	Artificial Fingerprint	High	Sequest HT	Sequest HT (A2)	A	2	Unambiguous	FSSSSGYGGGSSR	FSSSSGYGGGSSR		1	1	P35527	P35527	Keratin, type I cytoskeletal 9 OS=Homo sapiens OX=9606 GN=KRT9 PE=1 SV=3	0	2	2	0.448	0	1	1	1	618.268	1235.53	1235.53	0.51	0.00031	0	0	2.51572e+06	HCD	MS2	9.71855	50	23.7009	7200	7200	7199	0/0		2.79	1305	0	0.002205	0.608
1904247_Proteos_005.RAW	AF-M	Artificial Fingerprint	High	Sequest HT	Sequest HT (A2)	A	2	Unambiguous	TMQNTSDLDTAR	TmqNTSDLDTAR	M2(Oxidation); Q3(Deamidated)	1	1	P14923	P14923	Junction plakoglobin OS=Homo sapiens OX=9606 GN=JUP PE=1 SV=3	0	2	2	0.0101	0	1	1	1	685.309	1369.61	1369.59	15.61	0.01069	0	0	1.0318e+06	HCD	MS2	37.1221	50	23.7207	7212	7212	7207	0/0		2.98	2136	0.0007241	0.02379	0.25
1904247_Proteos_005.RAW	AF-M	Artificial Fingerprint	High	Sequest HT	Sequest HT (A2)	A	2	Unambiguous	TMQNTSDLDTAR	TmQnTSDLDTAR	M2(Oxidation); N4(Deamidated)	1	1	P14923	P14923	Junction plakoglobin OS=Homo sapiens OX=9606 GN=JUP PE=1 SV=3	0	2	2		0.0101	2	2	2	685.309	1369.61	1369.59	15.61	0.01069	0	0	1.0318e+06	HCD	MS2	37.1221	50	23.7207	7212	7212	7207	0/0		2.95	2136	0.0007241	0.0235	0.252
1904247_Proteos_005.RAW	AF-M	Artificial Fingerprint	High	Sequest HT	Sequest HT (A2)	A	2	Unambiguous	GGSGGGGSISGGGYGSGGGSGGR	GGSGGGGSISGGGYGSGGGSGGR		1	1	P35908	P35908	Keratin, type II cytoskeletal 2 epidermal OS=Homo sapiens OX=9606 GN=KRT2 PE=1 SV=2	0	2	2	0.6659	0	1	1	1	871.377	1741.75	1741.75	-0.97	-0.00085	0	0	499347	HCD	MS2	0	50	23.8221	7269	7269	7266	0/0		4.19	3227	0	0.0002312	0.947
1904247_Proteos_005.RAW	AF-M	Artificial Fingerprint	High	Sequest HT	Sequest HT (A2)	A	2	Unambiguous	NKYEDEINKR	NKYEDEINKR		4	6	P04264; P04259; A0A0S2Z428; P13647	P04264; P04259; A0A0S2Z428; P48668; P05787; P13647	Keratin, type II cytoskeletal 1 OS=Homo sapiens OX=9606 GN=KRT1 PE=1 SV=6; Keratin, type II cytoskeletal 6B OS=Homo sapiens OX=9606 GN=KRT6B PE=1 SV=5; HCG2039812 OS=Homo sapiens (Human) OX=9606 GN=KRT6A hCG_2039812; Keratin, type II cytoskeletal 6C OS=Homo sapiens OX=9606 GN=KRT6C PE=1 SV=3; Keratin, type II cytoskeletal 8 OS=Homo sapiens OX=9606 GN=KRT8 PE=1 SV=7; Keratin, type II cytoskeletal …	2	3	3	0.4432	0	1	1	1	436.89	1308.65	1308.65	0.18	8e-05	0	0	1.04886e+06	HCD	MS2	60.1032	50	23.8938	7304	7304	7303	0/0		3.52	1513	0.0007241	0.00613	0.454
1904247_Proteos_005.RAW	AF-M	Artificial Fingerprint	High	Sequest HT	Sequest HT (A2)	A	2	Unambiguous	GGSGGSYGGGGSGGGYGGGSGSR	GGSGGSYGGGGSGGGYGGGSGSR		1	1	P35527	P35527	Keratin, type I cytoskeletal 9 OS=Homo sapiens OX=9606 GN=KRT9 PE=1 SV=3	0	2	2	0.5572	0	1	1	1	896.369	1791.73	1791.73	1.7	0.00153	0	0	192822	HCD	MS2	20.137	50	23.9477	7331	7331	7330	0/0		3.32	2827	0	0.001572	0.659
1904247_Proteos_005.RAW	AF-M	Artificial Fingerprint	High	Sequest HT	Sequest HT (A2)	A	2	Unambiguous	KIQSQFTDAQK	KIQSQFTDAQK		1	1	P15924	P15924	Desmoplakin OS=Homo sapiens OX=9606 GN=DSP PE=1 SV=3	1	2	2	0.4286	0	1	1	1	647.343	1293.68	1293.68	-1.42	-0.00092	0	0	181569	HCD	MS2	9.68649	50	24.1982	7437	7437	7436	0/0		1.82	1233	0.002625	0.05276	0.129
1904247_Proteos_005.RAW	AF-M	Artificial Fingerprint	High	Sequest HT	Sequest HT (A2)	A	2	Unambiguous	STMQELNSR	STmqELNSR	M3(Oxidation); Q4(Deamidated)	1	1	P35527	P35527	Keratin, type I cytoskeletal 9 OS=Homo sapiens OX=9606 GN=KRT9 PE=1 SV=3	0	2	2	0.0607	0	1	1	1	541.742	1082.48	1082.48	-2.32	-0.00125	0	0	324494	HCD	MS2	35.54	50	24.4151	7520	7520	7519	0/0		2.14	963	0.004515	0.07976	0.066
1904247_Proteos_005.RAW	AF-M	Artificial Fingerprint	High	Sequest HT	Sequest HT (A2)	A	2	Unambiguous	EGIPPDQQR	EGIPPDQQR		1	5	A0A2R8Y422	A0A2R8Y422; P62987; P62979; P0CG47; P0CG48	Uncharacterized protein OS=Homo sapiens OX=9606 PE=4 SV=1; Ubiquitin-60S ribosomal protein L40 OS=Homo sapiens OX=9606 GN=UBA52 PE=1 SV=2; Ubiquitin-40S ribosomal protein S27a OS=Homo sapiens OX=9606 GN=RPS27A PE=1 SV=2; Polyubiquitin-B OS=Homo sapiens OX=9606 GN=UBB PE=1 SV=1; Polyubiquitin-C OS=Homo sapiens OX=9606 GN=UBC PE=1 SV=3	0	2	2	0.2928	0	1	1	1	520.263	1039.52	1039.52	1.24	0.00065	0	0	248562	HCD	MS2	29.5767	50	24.4378	7527	7527	7526	0/0		1.81	1171	0.007067	0.09468	0.039
1904247_Proteos_005.RAW	AF-M	Artificial Fingerprint	High	Sequest HT	Sequest HT (A2)	A	2	Unambiguous	SKAEAESLYQSK	SKAEAESLYQSK		1	1	P04264	P04264	Keratin, type II cytoskeletal 1 OS=Homo sapiens OX=9606 GN=KRT1 PE=1 SV=6	1	2	2	0.5447	0	1	1	1	670.838	1340.67	1340.67	-0.36	-0.00024	0	0	1.46777e+06	HCD	MS2	0	50	24.6348	7604	7604	7603	0/0		3.69	1767	0	0.001283	0.689
1904247_Proteos_005.RAW	AF-M	Artificial Fingerprint	High	Sequest HT	Sequest HT (A2)	A	2	Unambiguous	FSSSSGYGGGSSR	FSSSSGYGGGSSR		1	1	P35527	P35527	Keratin, type I cytoskeletal 9 OS=Homo sapiens OX=9606 GN=KRT9 PE=1 SV=3	0	2	2	0.4789	0	1	1	1	618.268	1235.53	1235.53	-0.19	-0.00011	0	0	468075	HCD	MS2	12.563	50	24.7075	7630	7630	7629	0/0		2.84	1295	0.0007241	0.003876	0.523
1904247_Proteos_005.RAW	AF-M	Artificial Fingerprint	High	Sequest HT	Sequest HT (A2)	A	2	Unambiguous	STMQELNSR	STMQELNSR		1	1	P35527	P35527	Keratin, type I cytoskeletal 9 OS=Homo sapiens OX=9606 GN=KRT9 PE=1 SV=3	0	2	2	0.4398	0	1	1	1	533.254	1065.5	1065.5	0.56	0.0003	0	0	91272.2	HCD	MS2	21.6535	50	24.762	7648	7648	7647	0/0		1.66	1030	0.0007241	0.008753	0.401
1904247_Proteos_005.RAW	AF-M	Artificial Fingerprint	High	Sequest HT	Sequest HT (A2)	A	2	Unambiguous	NHEEEMKDLR	NHEEEMKDLR		1	1	P13645	P13645	Keratin, type I cytoskeletal 10 OS=Homo sapiens OX=9606 GN=KRT10 PE=1 SV=6	1	3	3	0.129	0	1	1	1	434.203	1300.6	1300.6	0.69	0.0003	0	0	72845.2	HCD	MS2	71.2184	50	24.8168	7666	7666	7664	0/0		1.55	1885	0.001406	0.02867	0.222
1904247_Proteos_005.RAW	AF-M	Artificial Fingerprint	High	Sequest HT	Sequest HT (A2)	A	2	Unambiguous	GGSGGGGSISGGGYGSGGGSGGR	GGSGGGGSISGGGYGSGGGSGGR		1	1	P35908	P35908	Keratin, type II cytoskeletal 2 epidermal OS=Homo sapiens OX=9606 GN=KRT2 PE=1 SV=2	0	2	2	0.7161	0	1	1	1	871.378	1741.75	1741.75	-0.13	-0.00011	0	0	383894	HCD	MS2	0	50	24.8296	7669	7669	7668	0/0		3.91	3132	0	0.000154	1.008
1904247_Proteos_005.RAW	AF-M	Artificial Fingerprint	High	Sequest HT	Sequest HT (A2)	A	2	Unambiguous	NKYEDEINKR	NKYEDEINKR		4	6	P04264; P04259; A0A0S2Z428; P13647	P04264; P04259; A0A0S2Z428; P48668; P05787; P13647	Keratin, type II cytoskeletal 1 OS=Homo sapiens OX=9606 GN=KRT1 PE=1 SV=6; Keratin, type II cytoskeletal 6B OS=Homo sapiens OX=9606 GN=KRT6B PE=1 SV=5; HCG2039812 OS=Homo sapiens (Human) OX=9606 GN=KRT6A hCG_2039812; Keratin, type II cytoskeletal 6C OS=Homo sapiens OX=9606 GN=KRT6C PE=1 SV=3; Keratin, type II cytoskeletal 8 OS=Homo sapiens OX=9606 GN=KRT8 PE=1 SV=7; Keratin, type II cytoskeletal …	2	3	3	0.3993	0	1	1	1	436.89	1308.65	1308.65	0.46	0.0002	0	0	204897	HCD	MS2	54.3346	50	24.8948	7688	7688	7687	0/0		2.68	1516	0.0007241	0.02481	0.244
1904247_Proteos_005.RAW	AF-M	Artificial Fingerprint	High	Sequest HT	Sequest HT (A2)	A	2	Unambiguous	GGSGGSYGGGGSGGGYGGGSGSR	GGSGGSYGGGGSGGGYGGGSGSR		1	1	P35527	P35527	Keratin, type I cytoskeletal 9 OS=Homo sapiens OX=9606 GN=KRT9 PE=1 SV=3	0	2	2	0.6376	0	1	1	1	896.368	1791.73	1791.73	0.41	0.00037	0	0	98311.4	HCD	MS2	0	50	24.953	7710	7710	7709	0/0		2.98	2768	0	0.001235	0.695
1904247_Proteos_005.RAW	AF-M	Artificial Fingerprint	High	Sequest HT	Sequest HT (A2)	A	2	Unambiguous	ATMQNLNDR	ATMQNLNDR		1	2	Q04695	Q04695; A0A024R1X9	Keratin, type I cytoskeletal 17 OS=Homo sapiens OX=9606 GN=KRT17 PE=1 SV=2; Keratin 23 (Histone deacetylase inducible) OS=Homo sapiens (Human) OX=9606 GN=KRT23 hCG_1749891	0	2	2	0.343	0	1	1	1	531.754	1062.5	1062.5	0.59	0.00031	0	0	1.27726e+06	HCD	MS2	2.01798	50	25.0309	7743	7743	7742	0/0		2.07	1076	0.001406	0.02751	0.228
1904247_Proteos_005.RAW	AF-M	Artificial Fingerprint	High	Sequest HT	Sequest HT (A2)	A	2	Unambiguous	NKYEDEINKR	nKYEDEINKR	N1(Deamidated)	4	6	P04264; P04259; A0A0S2Z428; P13647	P04264; P04259; A0A0S2Z428; P48668; P05787; P13647	Keratin, type II cytoskeletal 1 OS=Homo sapiens OX=9606 GN=KRT1 PE=1 SV=6; Keratin, type II cytoskeletal 6B OS=Homo sapiens OX=9606 GN=KRT6B PE=1 SV=5; HCG2039812 OS=Homo sapiens (Human) OX=9606 GN=KRT6A hCG_2039812; Keratin, type II cytoskeletal 6C OS=Homo sapiens OX=9606 GN=KRT6C PE=1 SV=3; Keratin, type II cytoskeletal 8 OS=Homo sapiens OX=9606 GN=KRT8 PE=1 SV=7; Keratin, type II cytoskeletal …	2	2	2	0.318	0	1	1	1	655.322	1309.64	1309.64	-1.06	-0.00069	0	0	140381	HCD	MS2	5.93431	50	25.1148	7771	7771	7770	0/0		2.17	1667	0.0007241	0.02026	0.274
1904247_Proteos_005.RAW	AF-M	Artificial Fingerprint	High	Sequest HT	Sequest HT (A2)	A	2	Unambiguous	NHEEEMNALR	NHEEEMnALR	N7(Deamidated)	2	2	P02533; Q04695	P02533; Q04695	Keratin, type I cytoskeletal 14 OS=Homo sapiens OX=9606 GN=KRT14 PE=1 SV=4; Keratin, type I cytoskeletal 17 OS=Homo sapiens OX=9606 GN=KRT17 PE=1 SV=2	0	2	2	0.3314	0	1	1	1	622.273	1243.54	1243.54	1.85	0.00115	0	0	101128	HCD	MS2	0	50	25.1252	7776	7776	7775	0/0		1.72	1570	0.002625	0.05041	0.136
1904247_Proteos_005.RAW	AF-M	Artificial Fingerprint	High	Sequest HT	Sequest HT (A2)	A	2	Unambiguous	STMQELNSR	STmqELNSR	M3(Oxidation); Q4(Deamidated)	1	1	P35527	P35527	Keratin, type I cytoskeletal 9 OS=Homo sapiens OX=9606 GN=KRT9 PE=1 SV=3	0	2	2	0.0724	0	1	1	1	541.741	1082.48	1082.48	-2.77	-0.0015	0	0	378766	HCD	MS2	39.7542	50	25.425	7876	7876	7875	0/0		2.21	1024	0.0007241	0.02522	0.241
1904247_Proteos_005.RAW	AF-M	Artificial Fingerprint	High	Sequest HT	Sequest HT (A2)	A	2	Unambiguous	NLSDVATK	NLSDVATK		1	1	P14923	P14923	Junction plakoglobin OS=Homo sapiens OX=9606 GN=JUP PE=1 SV=3	0	2	2	0.4456	0	1	1	1	424.23	847.452	847.452	-0.1	-4e-05	0	0	1.43592e+06	HCD	MS2	14.9144	50	25.5162	7910	7910	7909	0/0		1.93	865	0.002625	0.05813	0.114
1904247_Proteos_005.RAW	AF-M	Artificial Fingerprint	High	Sequest HT	Sequest HT (A2)	A	2	Unambiguous	SKAEAESLYQSK	SKAEAESLYQSK		1	1	P04264	P04264	Keratin, type II cytoskeletal 1 OS=Homo sapiens OX=9606 GN=KRT1 PE=1 SV=6	1	3	3	0.2069	0	1	1	1	447.561	1340.67	1340.67	0.38	0.00017	0	0	690934	HCD	MS2	10.1119	50	25.6541	7958	7958	7957	0/0		1.74	1823	0.007067	0.0923	0.043
1904247_Proteos_005.RAW	AF-M	Artificial Fingerprint	High	Sequest HT	Sequest HT (A2)	A	2	Unambiguous	FSSSSGYGGGSSR	FSSSSGYGGGSSR		1	1	P35527	P35527	Keratin, type I cytoskeletal 9 OS=Homo sapiens OX=9606 GN=KRT9 PE=1 SV=3	0	2	2	0.4756	0	1	1	1	618.268	1235.53	1235.53	-0.68	-0.00042	0	0	184891	HCD	MS2	15.6197	50	25.7125	7976	7976	7975	0/0		2.25	1464	0.0007241	0.01313	0.34
1904247_Proteos_005.RAW	AF-M	Artificial Fingerprint	High	Sequest HT	Sequest HT (A2)	A	2	Unambiguous	DVDGAYMTK	DVDGAYmTK	M7(Oxidation)	1	1	P04264	P04264	Keratin, type II cytoskeletal 1 OS=Homo sapiens OX=9606 GN=KRT1 PE=1 SV=6	0	2	2	0.4161	0	1	1	1	508.223	1015.44	1015.44	-0.52	-0.00026	0	0	625516	HCD	MS2	16.2483	50	26.0777	8109	8109	8106	0/0		1.61	928	0.001797	0.03557	0.189
1904247_Proteos_005.RAW	AF-M	Artificial Fingerprint	High	Sequest HT	Sequest HT (A2)	A	2	Unambiguous	VVSTHEQVLR	VVSTHEQVLR		1	1	P02533	P02533	Keratin, type I cytoskeletal 14 OS=Homo sapiens OX=9606 GN=KRT14 PE=1 SV=4	0	3	3	0.1612	0	1	1	1	389.887	1167.65	1167.65	-0.6	-0.00023	0	0	1334504	HCD	MS2	21.5356	50	26.1209	8128	8128	8127	0/0		2.73	530	0.0007241	0.003547	0.537
1904247_Proteos_005.RAW	AF-M	Artificial Fingerprint	High	Sequest HT	Sequest HT (A2)	A	2	Unambiguous	NKYEDEINKR	nKYEDEINKR	N1(Deamidated)	4	6	P04264; P04259; A0A0S2Z428; P13647	P04264; P04259; A0A0S2Z428; P48668; P05787; P13647	Keratin, type II cytoskeletal 1 OS=Homo sapiens OX=9606 GN=KRT1 PE=1 SV=6; Keratin, type II cytoskeletal 6B OS=Homo sapiens OX=9606 GN=KRT6B PE=1 SV=5; HCG2039812 OS=Homo sapiens (Human) OX=9606 GN=KRT6A hCG_2039812; Keratin, type II cytoskeletal 6C OS=Homo sapiens OX=9606 GN=KRT6C PE=1 SV=3; Keratin, type II cytoskeletal 8 OS=Homo sapiens OX=9606 GN=KRT8 PE=1 SV=7; Keratin, type II cytoskeletal …	2	3	3	0.249	0	1	1	1	437.219	1309.64	1309.64	2.27	0.00099	0	0	291858	HCD	MS2	68.358	50	26.1222	8129	8129	8127	0/0		2.53	1683	0.001797	0.03004	0.215
1904247_Proteos_005.RAW	AF-M	Artificial Fingerprint	High	Sequest HT	Sequest HT (A2)	A	2	Unambiguous	SGGGGGGGGCGGGGGVSSLR	SGGGGGGGGcGGGGGVSSLR	C10(Carbamidomethyl)	1	1	P13645	P13645	Keratin, type I cytoskeletal 10 OS=Homo sapiens OX=9606 GN=KRT10 PE=1 SV=6	0	2	2	0.4982	0	1	1	1	775.343	1549.68	1549.68	1.56	0.00121	0	0	72591.6	HCD	MS2	0	50	26.2034	8162	8162	8161	0/0		2.73	2749	0.0007241	0.01939	0.281
1904247_Proteos_005.RAW	AF-M	Artificial Fingerprint	High	Sequest HT	Sequest HT (A2)	A	2	Unambiguous	HPEAEMAQNSVR	HPEAEMAqNSVR	Q8(Deamidated)	1	1	P14923	P14923	Junction plakoglobin OS=Homo sapiens OX=9606 GN=JUP PE=1 SV=3	0	2	2	0.052	0	1	1	1	685.312	1369.62	1369.62	-0.35	-0.00024	0	0	90644.9	HCD	MS2	15.961	50	26.2767	8185	8185	8183	0/0		1.73	2135	0.0007241	0.02208	0.261
1904247_Proteos_005.RAW	AF-M	Artificial Fingerprint	High	Sequest HT	Sequest HT (A2)	A	2	Unambiguous	HPEAEMAQNSVR	HPEAEMAQnSVR	N9(Deamidated)	1	1	P14923	P14923	Junction plakoglobin OS=Homo sapiens OX=9606 GN=JUP PE=1 SV=3	0	2	2	0.052	0	1	2	2	685.312	1369.62	1369.62	-0.35	-0.00024	0	0	90644.9	HCD	MS2	15.961	50	26.2767	8185	8185	8183	0/0		1.73	2135	0.0007241	0.02208	0.261
1904247_Proteos_005.RAW	AF-M	Artificial Fingerprint	High	Sequest HT	Sequest HT (A2)	A	2	Unambiguous	SGGGGGGGLGSGGSIR	SGGGGGGGLGSGGSIR		1	1	P35527	P35527	Keratin, type I cytoskeletal 9 OS=Homo sapiens OX=9606 GN=KRT9 PE=1 SV=3	0	2	2	0.4978	0	1	1	1	616.802	1232.6	1232.6	-0.08	-5e-05	0	0	212478	HCD	MS2	6.28197	50	26.2954	8191	8191	8190	0/0		2.29	1490	0.0007241	0.01173	0.357
1904247_Proteos_005.RAW	AF-M	Artificial Fingerprint	High	Sequest HT	Sequest HT (A2)	A	2	Unambiguous	STMQELNSR	STMQELNSR		1	1	P35527	P35527	Keratin, type I cytoskeletal 9 OS=Homo sapiens OX=9606 GN=KRT9 PE=1 SV=3	0	2	2	0.427	0	1	1	1	533.254	1065.5	1065.5	0.56	0.0003	0	0	212478	HCD	MS2	32.9124	50	26.3909	8220	8220	8218	0/0		1.78	1030	0.0007241	0.02634	0.235
1904247_Proteos_005.RAW	AF-M	Artificial Fingerprint	High	Sequest HT	Sequest HT (A2)	A	2	Unambiguous	STMQELNSR	STmQELnSR	M3(Oxidation); N7(Deamidated)	1	1	P35527	P35527	Keratin, type I cytoskeletal 9 OS=Homo sapiens OX=9606 GN=KRT9 PE=1 SV=3	0	2	2	0.0272	0	1	1	1	541.741	1082.48	1082.48	-2.43	-0.00132	0	0	297957	HCD	MS2	20.7637	50	26.4349	8234	8234	8233	0/0		1.84	956	0.0007241	0.02575	0.238
1904247_Proteos_005.RAW	AF-M	Artificial Fingerprint	High	Sequest HT	Sequest HT (A2)	A	2	Unambiguous	STMQELNSR	STmqELNSR	M3(Oxidation); Q4(Deamidated)	1	1	P35527	P35527	Keratin, type I cytoskeletal 9 OS=Homo sapiens OX=9606 GN=KRT9 PE=1 SV=3	0	2	2		0.0272	2	2	2	541.741	1082.48	1082.48	-2.43	-0.00132	0	0	297957	HCD	MS2	20.7637	50	26.4349	8234	8234	8233	0/0		1.79	956	0.0007241	0.02652	0.234
1904247_Proteos_005.RAW	AF-M	Artificial Fingerprint	High	Sequest HT	Sequest HT (A2)	A	2	Unambiguous	SEPIYNSR	SEPIYnSR	N6(Deamidated)	1	1	Q5T749	Q5T749	Keratinocyte proline-rich protein OS=Homo sapiens OX=9606 GN=KPRP PE=1 SV=1	0	2	2	0.4351	0	1	1	1	483.73	966.453	966.453	0.3	0.00014	0	0	689323	HCD	MS2	18.4766	50	26.8838	8396	8396	8395	0/0		1.54	813	0.002625	0.06124	0.106
1904247_Proteos_005.RAW	AF-M	Artificial Fingerprint	High	Sequest HT	Sequest HT (A2)	A	2	Unambiguous	NKYEDEINKR	NKYEDEINKR		4	6	P04264; P04259; A0A0S2Z428; P13647	P04264; P04259; A0A0S2Z428; P48668; P05787; P13647	Keratin, type II cytoskeletal 1 OS=Homo sapiens OX=9606 GN=KRT1 PE=1 SV=6; Keratin, type II cytoskeletal 6B OS=Homo sapiens OX=9606 GN=KRT6B PE=1 SV=5; HCG2039812 OS=Homo sapiens (Human) OX=9606 GN=KRT6A hCG_2039812; Keratin, type II cytoskeletal 6C OS=Homo sapiens OX=9606 GN=KRT6C PE=1 SV=3; Keratin, type II cytoskeletal 8 OS=Homo sapiens OX=9606 GN=KRT8 PE=1 SV=7; Keratin, type II cytoskeletal …	2	3	3	0.328	0	1	1	1	436.89	1308.65	1308.65	0.25	0.00011	0	0	140075	HCD	MS2	56.0841	50	27.1283	8482	8482	8481	0/0		1.86	1513	0.0007241	0.02186	0.263
1904247_Proteos_005.RAW	AF-M	Artificial Fingerprint	High	Sequest HT	Sequest HT (A2)	A	2	Unambiguous	SGGGGGGGLGSGGSIR	SGGGGGGGLGSGGSIR		1	1	P35527	P35527	Keratin, type I cytoskeletal 9 OS=Homo sapiens OX=9606 GN=KRT9 PE=1 SV=3	0	2	2	0.6193	0	1	1	1	616.802	1232.6	1232.6	-0.18	-0.00011	0	0	11831797	HCD	MS2	0.209757	11.062	27.3008	8546	8546	8545	0/0		3.94	1490	0	0.0006481	0.792
1904247_Proteos_005.RAW	AF-M	Artificial Fingerprint	High	Sequest HT	Sequest HT (A2)	A	2	Unambiguous	STMQELNSR	STMQELNSR		1	1	P35527	P35527	Keratin, type I cytoskeletal 9 OS=Homo sapiens OX=9606 GN=KRT9 PE=1 SV=3	0	2	2	0.3782	0	1	1	1	533.254	1065.5	1065.5	0.67	0.00036	0	0	137003616	HCD	MS2	0	3.804	27.302	8547	8547	8545	0/0		2.38	1030	0.006305	0.08682	0.052
1904247_Proteos_005.RAW	AF-M	Artificial Fingerprint	High	Sequest HT	Sequest HT (A2)	A	2	Unambiguous	LSGGLGAGSCR	LSGGLGAGScR	C10(Carbamidomethyl)	1	1	Q04695	Q04695	Keratin, type I cytoskeletal 17 OS=Homo sapiens OX=9606 GN=KRT17 PE=1 SV=2	0	2	2	0.4	0	1	1	1	517.757	1034.51	1034.5	1.59	0.00082	0	0	315431	HCD	MS2	51.5427	50	27.3033	8548	8548	8545	0/0		1.85	1109	0.0007241	0.01276	0.344
1904247_Proteos_005.RAW	AF-M	Artificial Fingerprint	High	Sequest HT	Sequest HT (A2)	A	2	Unambiguous	SQYEQLAEQNRK	SQYEQLAEQNRK		1	1	P13645	P13645	Keratin, type I cytoskeletal 10 OS=Homo sapiens OX=9606 GN=KRT10 PE=1 SV=6	1	3	3	0.1364	0	1	1	4	498.582	1493.73	1493.73	-1.91	-0.00095	0	0	116724	HCD	MS2	46.0197	50	27.3481	8564	8564	8562	0/0		0.88	2182	0.009708	0.1092	0.016
1904247_Proteos_005.RAW	AF-M	Artificial Fingerprint	High	Sequest HT	Sequest HT (A2)	A	2	Unambiguous	STMQELNSR	STmQELNSR	M3(Oxidation)	1	1	P35527	P35527	Keratin, type I cytoskeletal 9 OS=Homo sapiens OX=9606 GN=KRT9 PE=1 SV=3	0	2	2	0.4714	0	1	1	1	541.25	1081.49	1081.49	-0.96	-0.00052	0	0	964758	HCD	MS2	2.90662	50	27.4419	8593	8593	8592	0/0		2.1	961	0.002377	0.04762	0.145
1904247_Proteos_005.RAW	AF-M	Artificial Fingerprint	High	Sequest HT	Sequest HT (A2)	A	2	Unambiguous	STMQELNSR	STmqELNSR	M3(Oxidation); Q4(Deamidated)	1	1	P35527	P35527	Keratin, type I cytoskeletal 9 OS=Homo sapiens OX=9606 GN=KRT9 PE=1 SV=3	0	2	2	0.0977	0	1	1	1	541.744	1082.48	1082.48	1.85	0.001	0	0	101114	HCD	MS2	35.1938	50	27.898	8740	8740	8739	0/0		1.74	1109	0.0007241	0.02691	0.232
1904247_Proteos_005.RAW	AF-M	Artificial Fingerprint	High	Sequest HT	Sequest HT (A2)	A	2	Unambiguous	AEAESLYQSK	AEAESLYQSK		1	1	P04264	P04264	Keratin, type II cytoskeletal 1 OS=Homo sapiens OX=9606 GN=KRT1 PE=1 SV=6	0	2	2	0.5258	0	1	1	1	563.275	1125.54	1125.54	0.14	8e-05	0	0	286074	HCD	MS2	0	50	27.9315	8752	8752	8750	0/0		2.13	1453	0.0007241	0.008917	0.398
1904247_Proteos_005.RAW	AF-M	Artificial Fingerprint	High	Sequest HT	Sequest HT (A2)	A	2	Unambiguous	SQYEQLAEQNRK	SQYEQLAEQNRK		1	1	P13645	P13645	Keratin, type I cytoskeletal 10 OS=Homo sapiens OX=9606 GN=KRT10 PE=1 SV=6	1	2	2	0.4837	0	1	1	1	747.37	1493.73	1493.73	-0.49	-0.00036	0	0	178662	HCD	MS2	39.2524	50	28.2606	8860	8860	8859	0/0		2.15	2146	0.0007241	0.0203	0.274
1904247_Proteos_005.RAW	AF-M	Artificial Fingerprint	High	Sequest HT	Sequest HT (A2)	A	2	Unambiguous	STMQELNSR	STMQELnSR	N7(Deamidated)	1	1	P35527	P35527	Keratin, type I cytoskeletal 9 OS=Homo sapiens OX=9606 GN=KRT9 PE=1 SV=3	0	2	2	0.2338	0	1	1	1	533.746	1066.48	1066.48	1.12	0.0006	0	0	36134524	HCD	MS2	1.36361	2.617	28.3071	8879	8879	8878	0/0		2.01	1064	0.009708	0.1161	0.006
1904247_Proteos_005.RAW	AF-M	Artificial Fingerprint	High	Sequest HT	Sequest HT (A2)	A	2	Unambiguous	SGGGGGGGLGSGGSIR	SGGGGGGGLGSGGSIR		1	1	P35527	P35527	Keratin, type I cytoskeletal 9 OS=Homo sapiens OX=9606 GN=KRT9 PE=1 SV=3	0	2	2	0.6226	0	1	1	1	616.802	1232.6	1232.6	-0.28	-0.00017	0	0	1.03042e+06	HCD	MS2	0	50	28.3085	8880	8880	8878	0/0		3.63	1540	0	0.0003866	0.87
1904247_Proteos_005.RAW	AF-M	Artificial Fingerprint	High	Sequest HT	Sequest HT (A2)	A	2	Unambiguous	SEVTELR	SEVTELR		1	1	P08779	P08779	Keratin, type I cytoskeletal 16 OS=Homo sapiens OX=9606 GN=KRT16 PE=1 SV=4	0	2	2	0.1847	0	1	1	1	417.222	833.437	833.436	0.52	0.00022	0	0	162735	HCD	MS2	0	50	28.3411	8895	8895	8894	0/0		1.57	850	0.003126	0.07004	0.086
1904247_Proteos_005.RAW	AF-M	Artificial Fingerprint	High	Sequest HT	Sequest HT (A2)	A	2	Unambiguous	ESSNVVVTER	ESSNVVVTER		1	1	Q02413	Q02413	Desmoglein-1 OS=Homo sapiens OX=9606 GN=DSG1 PE=1 SV=2	0	2	2	0.3382	0	1	1	1	560.287	1119.57	1119.56	1.61	0.0009	0	0	147520	HCD	MS2	42.178	50	28.3772	8906	8906	8905	0/0		2.04	1129	0.001797	0.03976	0.172
1904247_Proteos_005.RAW	AF-M	Artificial Fingerprint	High	Sequest HT	Sequest HT (A2)	A	2	Unambiguous	SQYEQLAEQNRK	SQYEQLAEQNRK		1	1	P13645	P13645	Keratin, type I cytoskeletal 10 OS=Homo sapiens OX=9606 GN=KRT10 PE=1 SV=6	1	3	3	0.4733	0	1	1	1	498.583	1493.73	1493.73	0.42	0.00021	0	0	37054208	HCD	MS2	0.239146	3.134	28.6192	8993	8993	8992	0/0		2.62	2171	0.001797	0.04049	0.17
1904247_Proteos_005.RAW	AF-M	Artificial Fingerprint	High	Sequest HT	Sequest HT (A2)	A	2	Unambiguous	STMQELNSR	STmQELnSR	M3(Oxidation); N7(Deamidated)	1	1	P35527	P35527	Keratin, type I cytoskeletal 9 OS=Homo sapiens OX=9606 GN=KRT9 PE=1 SV=3	0	2	2	0.3043	0	1	1	1	541.743	1082.48	1082.48	0.61	0.00033	0	0	217233	HCD	MS2	21.6537	50	28.9043	9079	9079	9078	0/0		1.38	983	0.0007241	0.01422	0.328
1904247_Proteos_005.RAW	AF-M	Artificial Fingerprint	High	Sequest HT	Sequest HT (A2)	A	2	Unambiguous	AGIIASAR	AGIIASAR		1	1	P13639	P13639	Elongation factor 2 OS=Homo sapiens OX=9606 GN=EEF2 PE=1 SV=4	0	2	2	0.2033	0	1	1	1	379.73	758.452	758.452	0.21	8e-05	0	0	390421	HCD	MS2	48.2194	50	28.9138	9083	9083	9081	0/0		1.82	841	0.001797	0.03602	0.187
1904247_Proteos_005.RAW	AF-M	Artificial Fingerprint	High	Sequest HT	Sequest HT (A2)	A	2	Unambiguous	DVDGAYMTK	DVDGAYmTK	M7(Oxidation)	1	1	P04264	P04264	Keratin, type II cytoskeletal 1 OS=Homo sapiens OX=9606 GN=KRT1 PE=1 SV=6	0	2	2	0.2789	0	1	1	1	508.224	1015.44	1015.44	0.32	0.00016	0	0	1.40291e+06	HCD	MS2	9.10767	50	28.9848	9105	9105	9104	0/0		1.47	926	0.007067	0.0947	0.039
1904247_Proteos_005.RAW	AF-M	Artificial Fingerprint	High	Sequest HT	Sequest HT (A2)	A	2	Unambiguous	LLEGEECR	LLEGEEcR	C7(Carbamidomethyl)	5	11	P35908; P04259; A0A0S2Z428; Q8N1N4; P13647	Q7RTS7; Q86Y46; P35908; P04259; A0A0S2Z428; Q01546; O95678; P48668; P12036; Q8N1N4; P13647	Keratin, type II cytoskeletal 74 OS=Homo sapiens OX=9606 GN=KRT74 PE=1 SV=2; Keratin, type II cytoskeletal 73 OS=Homo sapiens OX=9606 GN=KRT73 PE=1 SV=1; Keratin, type II cytoskeletal 2 epidermal OS=Homo sapiens OX=9606 GN=KRT2 PE=1 SV=2; Keratin, type II cytoskeletal 6B OS=Homo sapiens OX=9606 GN=KRT6B PE=1 SV=5; HCG2039812 OS=Homo sapiens (Human) OX=9606 GN=KRT6A hCG_2039812; Keratin, type II c…	0	2	2	0.2864	0	1	1	1	503.237	1005.47	1005.47	0.42	0.00021	0	0	444065	HCD	MS2	30.6039	50	29.0311	9119	9119	9117	0/0		2.06	969	0.0007241	0.01249	0.347
1904247_Proteos_005.RAW	AF-M	Artificial Fingerprint	High	Sequest HT	Sequest HT (A2)	A	2	Unambiguous	SQYEQLAEQNRK	SQYEQLAEQNRK		1	1	P13645	P13645	Keratin, type I cytoskeletal 10 OS=Homo sapiens OX=9606 GN=KRT10 PE=1 SV=6	1	2	2	0.4494	0	1	1	1	747.372	1493.74	1493.73	1.39	0.00104	0	0	72483.6	HCD	MS2	0	50	29.2638	9178	9178	9177	0/0		1.78	2089	0.002625	0.06084	0.107
1904247_Proteos_005.RAW	AF-M	Artificial Fingerprint	High	Sequest HT	Sequest HT (A2)	A	2	Unambiguous	STMQELNSR	STMQELnSR	N7(Deamidated)	1	1	P35527	P35527	Keratin, type I cytoskeletal 9 OS=Homo sapiens OX=9606 GN=KRT9 PE=1 SV=3	0	2	2	0.0415	0	1	1	1	533.745	1066.48	1066.48	-1.05	-0.00056	0	0	1.16684e+06	HCD	MS2	16.1383	50	29.3092	9191	9191	9190	0/0		2.17	957	0.001797	0.03407	0.196
1904247_Proteos_005.RAW	AF-M	Artificial Fingerprint	High	Sequest HT	Sequest HT (A2)	A	2	Unambiguous	STMQELNSR	STMqELNSR	Q4(Deamidated)	1	1	P35527	P35527	Keratin, type I cytoskeletal 9 OS=Homo sapiens OX=9606 GN=KRT9 PE=1 SV=3	0	2	2		0.0415	2	2	2	533.745	1066.48	1066.48	-1.05	-0.00056	0	0	1.16684e+06	HCD	MS2	16.1383	50	29.3092	9191	9191	9190	0/0		2.08	957	0.001797	0.04012	0.171
1904247_Proteos_005.RAW	AF-M	Artificial Fingerprint	High	Sequest HT	Sequest HT (A2)	A	2	Unambiguous	SGGGGGGGLGSGGSIR	SGGGGGGGLGSGGSIR		1	1	P35527	P35527	Keratin, type I cytoskeletal 9 OS=Homo sapiens OX=9606 GN=KRT9 PE=1 SV=3	0	2	2	0.6031	0	1	1	1	616.803	1232.6	1232.6	0.02	1e-05	0	0	392365	HCD	MS2	10.8002	50	29.3201	9196	9196	9195	0/0		3.25	1490	0	0.001524	0.664
1904247_Proteos_005.RAW	AF-M	Artificial Fingerprint	High	Sequest HT	Sequest HT (A2)	A	2	Unambiguous	SEVTELR	SEVTELR		1	1	P08779	P08779	Keratin, type I cytoskeletal 16 OS=Homo sapiens OX=9606 GN=KRT16 PE=1 SV=4	0	2	2	0.1933	0	1	1	1	417.222	833.436	833.436	-0.21	-9e-05	0	0	79480	HCD	MS2	18.1332	50	29.3486	9204	9204	9203	0/0		1.19	854	0.001797	0.04673	0.148
1904247_Proteos_005.RAW	AF-M	Artificial Fingerprint	High	Sequest HT	Sequest HT (A2)	A	2	Unambiguous	NKYEDEINKR	NKYEDEINKR		4	6	P04264; P04259; A0A0S2Z428; P13647	P04264; P04259; A0A0S2Z428; P48668; P05787; P13647	Keratin, type II cytoskeletal 1 OS=Homo sapiens OX=9606 GN=KRT1 PE=1 SV=6; Keratin, type II cytoskeletal 6B OS=Homo sapiens OX=9606 GN=KRT6B PE=1 SV=5; HCG2039812 OS=Homo sapiens (Human) OX=9606 GN=KRT6A hCG_2039812; Keratin, type II cytoskeletal 6C OS=Homo sapiens OX=9606 GN=KRT6C PE=1 SV=3; Keratin, type II cytoskeletal 8 OS=Homo sapiens OX=9606 GN=KRT8 PE=1 SV=7; Keratin, type II cytoskeletal …	2	3	3	0.3512	0	1	1	1	436.889	1308.65	1308.65	-0.24	-0.00011	0	0	70357	HCD	MS2	60.6432	50	29.4188	9222	9222	9219	0/0		2.42	1532	0.0007241	0.01095	0.367
1904247_Proteos_005.RAW	AF-M	Artificial Fingerprint	High	Sequest HT	Sequest HT (A2)	A	2	Unambiguous	SQYEQLAEQNRK	SQYEQLAEQNRK		1	1	P13645	P13645	Keratin, type I cytoskeletal 10 OS=Homo sapiens OX=9606 GN=KRT10 PE=1 SV=6	1	3	3	0.3789	0	1	1	1	498.583	1493.73	1493.73	0.42	0.00021	0	0	779281	HCD	MS2	1.21238	50	29.6269	9277	9277	9276	0/0		2.56	2171	0.0007241	0.009165	0.394
1904247_Proteos_005.RAW	AF-M	Artificial Fingerprint	High	Sequest HT	Sequest HT (A2)	A	2	Unambiguous	HGGGGGGFGGGGFGSR	HGGGGGGFGGGGFGSR		1	1	P35908	P35908	Keratin, type II cytoskeletal 2 epidermal OS=Homo sapiens OX=9606 GN=KRT2 PE=1 SV=2	0	3	3	0.4789	0	1	1	1	440.866	1320.58	1320.58	0.47	0.00021	0	0	779419	HCD	MS2	30.1086	50	29.8133	9320	9320	9319	0/0		2.84	1592	0.0007241	0.006521	0.445
1904247_Proteos_005.RAW	AF-M	Artificial Fingerprint	High	Sequest HT	Sequest HT (A2)	A	2	Unambiguous	IHSDCAANQQVTYR	IHSDcAAnQQVTYR	C5(Carbamidomethyl); N8(Deamidated)	1	1	Q02413	Q02413	Desmoglein-1 OS=Homo sapiens OX=9606 GN=DSG1 PE=1 SV=2	0	3	3	0.0558	0	1	1	1	555.255	1663.75	1663.75	0.04	2e-05	0	0	204167	HCD	MS2	32.5457	50	29.8363	9327	9327	9324	0/0		2.51	3351	0.0007241	0.008067	0.413
1904247_Proteos_005.RAW	AF-M	Artificial Fingerprint	High	Sequest HT	Sequest HT (A2)	A	2	Unambiguous	LLEGEECR	LLEGEEcR	C7(Carbamidomethyl)	5	11	P35908; P04259; A0A0S2Z428; Q8N1N4; P13647	Q7RTS7; Q86Y46; P35908; P04259; A0A0S2Z428; Q01546; O95678; P48668; P12036; Q8N1N4; P13647	Keratin, type II cytoskeletal 74 OS=Homo sapiens OX=9606 GN=KRT74 PE=1 SV=2; Keratin, type II cytoskeletal 73 OS=Homo sapiens OX=9606 GN=KRT73 PE=1 SV=1; Keratin, type II cytoskeletal 2 epidermal OS=Homo sapiens OX=9606 GN=KRT2 PE=1 SV=2; Keratin, type II cytoskeletal 6B OS=Homo sapiens OX=9606 GN=KRT6B PE=1 SV=5; HCG2039812 OS=Homo sapiens (Human) OX=9606 GN=KRT6A hCG_2039812; Keratin, type II c…	0	2	2	0.3198	0	1	1	1	503.237	1005.47	1005.47	0.66	0.00033	0	0	1.04711e+06	HCD	MS2	9.63048	50	30.0365	9393	9393	9392	0/0		1.72	969	0.0007241	0.01605	0.31
1904247_Proteos_005.RAW	AF-M	Artificial Fingerprint	High	Sequest HT	Sequest HT (A2)	A	2	Unambiguous	STMQELNSR	STMQELnSR	N7(Deamidated)	1	1	P35527	P35527	Keratin, type I cytoskeletal 9 OS=Homo sapiens OX=9606 GN=KRT9 PE=1 SV=3	0	2	2	0.0547	0	1	1	1	533.746	1066.48	1066.48	0.89	0.00048	0	0	332596	HCD	MS2	40.2777	50	30.3184	9472	9472	9471	0/0		2.01	988	0.001797	0.04059	0.169
1904247_Proteos_005.RAW	AF-M	Artificial Fingerprint	High	Sequest HT	Sequest HT (A2)	A	2	Unambiguous	SGGGGGGGLGSGGSIR	SGGGGGGGLGSGGSIR		1	1	P35527	P35527	Keratin, type I cytoskeletal 9 OS=Homo sapiens OX=9606 GN=KRT9 PE=1 SV=3	0	2	2	0.4749	0	1	1	1	616.803	1232.6	1232.6	0.61	0.00038	0	0	188561	HCD	MS2	26.0119	50	30.3262	9475	9475	9474	0/0		2.59	1557	0.0007241	0.0202	0.275
1904247_Proteos_005.RAW	AF-M	Artificial Fingerprint	High	Sequest HT	Sequest HT (A2)	A	2	Unambiguous	FSNSSSSNEFSK	FSNSSSSnEFSK	N8(Deamidated)	1	1	Q5D862	Q5D862	Filaggrin-2 OS=Homo sapiens OX=9606 GN=FLG2 PE=1 SV=1	0	2	2	0.3254	0	1	1	1	661.276	1321.55	1321.55	-6.66	-0.0044	0	0	139581	HCD	MS2	46.8036	50	30.4995	9520	9520	9519	0/0		2.09	1423	0.0007241	0.02613	0.236
1904247_Proteos_005.RAW	AF-M	Artificial Fingerprint	High	Sequest HT	Sequest HT (A2)	A	2	Unambiguous	SQYEQLAEQNRK	SQYEQLAEQnRK	N10(Deamidated)	1	1	P13645	P13645	Keratin, type I cytoskeletal 10 OS=Homo sapiens OX=9606 GN=KRT10 PE=1 SV=6	1	2	2	0.0622	0	1	1	1	747.863	1494.72	1494.72	0.16	0.00012	0	0	72160.4	HCD	MS2	42.0547	50	30.5844	9542	9542	9541	0/0		1.93	2436	0.0007241	0.0106	0.372
1904247_Proteos_005.RAW	AF-M	Artificial Fingerprint	High	Sequest HT	Sequest HT (A2)	A	2	Unambiguous	SQYEQLAEQNRK	SQYEQLAEQnRK	N10(Deamidated)	1	1	P13645	P13645	Keratin, type I cytoskeletal 10 OS=Homo sapiens OX=9606 GN=KRT10 PE=1 SV=6	1	3	3	0.0313	0	1	1	1	498.911	1494.72	1494.72	0.54	0.00027	0	0	1.92661e+06	HCD	MS2	26.7224	42.051	30.6326	9554	9554	9553	0/0		3.2	2403	0	0.002301	0.602
1904247_Proteos_005.RAW	AF-M	Artificial Fingerprint	High	Sequest HT	Sequest HT (A2)	A	2	Unambiguous	SQYEQLAEQNRK	SQYEQLAEqNRK	Q9(Deamidated)	1	1	P13645	P13645	Keratin, type I cytoskeletal 10 OS=Homo sapiens OX=9606 GN=KRT10 PE=1 SV=6	1	3	3		0.0313	2	2	2	498.911	1494.72	1494.72	0.54	0.00027	0	0	1.92661e+06	HCD	MS2	26.7224	42.051	30.6326	9554	9554	9553	0/0		3.1	2403	0.0007241	0.02257	0.258
1904247_Proteos_005.RAW	AF-M	Artificial Fingerprint	High	Sequest HT	Sequest HT (A2)	A	2	Unambiguous	HGGGGGGFGGGGFGSR	HGGGGGGFGGGGFGSR		1	1	P35908	P35908	Keratin, type II cytoskeletal 2 epidermal OS=Homo sapiens OX=9606 GN=KRT2 PE=1 SV=2	0	3	3	0.5772	0	1	1	1	440.866	1320.58	1320.58	0.26	0.00011	0	0	778379	HCD	MS2	10.2279	50	30.8195	9599	9599	9598	0/0		2.72	1592	0.0007241	0.00625	0.451
1904247_Proteos_005.RAW	AF-M	Artificial Fingerprint	High	Sequest HT	Sequest HT (A2)	A	2	Unambiguous	STMQELNSR	STmQELnSR	M3(Oxidation); N7(Deamidated)	1	1	P35527	P35527	Keratin, type I cytoskeletal 9 OS=Homo sapiens OX=9606 GN=KRT9 PE=1 SV=3	0	2	2	0.322	0	1	1	1	541.743	1082.48	1082.48	-0.18	-9e-05	0	0	96284.9	HCD	MS2	0	50	30.9116	9624	9624	9623	0/0		1.18	969	0.002625	0.05893	0.112
1904247_Proteos_005.RAW	AF-M	Artificial Fingerprint	High	Sequest HT	Sequest HT (A2)	A	2	Unambiguous	LLEGEECR	LLEGEEcR	C7(Carbamidomethyl)	5	11	P35908; P04259; A0A0S2Z428; Q8N1N4; P13647	Q7RTS7; Q86Y46; P35908; P04259; A0A0S2Z428; Q01546; O95678; P48668; P12036; Q8N1N4; P13647	Keratin, type II cytoskeletal 74 OS=Homo sapiens OX=9606 GN=KRT74 PE=1 SV=2; Keratin, type II cytoskeletal 73 OS=Homo sapiens OX=9606 GN=KRT73 PE=1 SV=1; Keratin, type II cytoskeletal 2 epidermal OS=Homo sapiens OX=9606 GN=KRT2 PE=1 SV=2; Keratin, type II cytoskeletal 6B OS=Homo sapiens OX=9606 GN=KRT6B PE=1 SV=5; HCG2039812 OS=Homo sapiens (Human) OX=9606 GN=KRT6A hCG_2039812; Keratin, type II c…	0	2	2	0.3592	0	1	1	1	503.237	1005.47	1005.47	0.18	9e-05	0	0	178452	HCD	MS2	17.3534	50	31.0439	9662	9662	9661	0/0		1.42	969	0.004515	0.07909	0.067
1904247_Proteos_005.RAW	AF-M	Artificial Fingerprint	High	Sequest HT	Sequest HT (A2)	A	2	Unambiguous	TSFTSVSR	TSFTSVSR		1	1	P13647	P13647	Keratin, type II cytoskeletal 5 OS=Homo sapiens OX=9606 GN=KRT5 PE=1 SV=3	0	2	2	0.4241	0	1	1	1	442.727	884.447	884.447	0.17	8e-05	0	0	576707	HCD	MS2	6.04401	50	31.1459	9690	9690	9688	0/0		1.91	582	0.0007241	0.02312	0.255
1904247_Proteos_005.RAW	AF-M	Artificial Fingerprint	High	Sequest HT	Sequest HT (A2)	A	2	Unambiguous	STMQELNSR	STMQELnSR	N7(Deamidated)	1	1	P35527	P35527	Keratin, type I cytoskeletal 9 OS=Homo sapiens OX=9606 GN=KRT9 PE=1 SV=3	0	2	2	0.0178	0	1	1	1	533.745	1066.48	1066.48	-0.48	-0.00026	0	0	1.08998e+06	HCD	MS2	6.11754	50	31.3227	9738	9738	9737	0/0		2.25	957	0.001797	0.03189	0.206
1904247_Proteos_005.RAW	AF-M	Artificial Fingerprint	High	Sequest HT	Sequest HT (A2)	A	2	Unambiguous	STMQELNSR	STMqELNSR	Q4(Deamidated)	1	1	P35527	P35527	Keratin, type I cytoskeletal 9 OS=Homo sapiens OX=9606 GN=KRT9 PE=1 SV=3	0	2	2		0.0178	2	2	2	533.745	1066.48	1066.48	-0.48	-0.00026	0	0	1.08998e+06	HCD	MS2	6.11754	50	31.3227	9738	9738	9737	0/0		2.21	957	0.001797	0.03357	0.198
1904247_Proteos_005.RAW	AF-M	Artificial Fingerprint	High	Sequest HT	Sequest HT (A2)	A	2	Unambiguous	SGGGGGGGLGSGGSIR	SGGGGGGGLGSGGSIR		1	1	P35527	P35527	Keratin, type I cytoskeletal 9 OS=Homo sapiens OX=9606 GN=KRT9 PE=1 SV=3	0	2	2	0.466	0	1	1	1	616.802	1232.6	1232.6	-0.08	-5e-05	0	0	131864	HCD	MS2	0	50	31.3292	9740	9740	9739	0/0		1.91	1490	0.001797	0.03551	0.19
1904247_Proteos_005.RAW	AF-M	Artificial Fingerprint	High	Sequest HT	Sequest HT (A2)	A	2	Unambiguous	SQYEQLAEQNRK	SQYEQLAEQnRK	N10(Deamidated)	1	1	P13645	P13645	Keratin, type I cytoskeletal 10 OS=Homo sapiens OX=9606 GN=KRT10 PE=1 SV=6	1	2	2	0.2336	0	1	1	1	747.862	1494.72	1494.72	-0.74	-0.00055	0	0	72182.4	HCD	MS2	0	50	31.5858	9806	9806	9805	0/0		2.14	2347	0.007067	0.09272	0.042
1904247_Proteos_005.RAW	AF-M	Artificial Fingerprint	High	Sequest HT	Sequest HT (A2)	A	2	Unambiguous	SQYEQLAEQNRK	SQYEQLAEqNRK	Q9(Deamidated)	1	1	P13645	P13645	Keratin, type I cytoskeletal 10 OS=Homo sapiens OX=9606 GN=KRT10 PE=1 SV=6	1	2	2	0.2336	0	1	2	2	747.862	1494.72	1494.72	-0.74	-0.00055	0	0	72182.4	HCD	MS2	0	50	31.5858	9806	9806	9805	0/0		2.14	2347	0.007067	0.09272	0.042
1904247_Proteos_005.RAW	AF-M	Artificial Fingerprint	High	Sequest HT	Sequest HT (A2)	A	2	Unambiguous	TDEGIAYR	TDEGIAYR		1	1	P32119	P32119	Peroxiredoxin-2 OS=Homo sapiens OX=9606 GN=PRDX2 PE=1 SV=5	0	2	2	0.1769	0	1	1	1	462.725	924.442	924.442	-0.28	-0.00013	0	0	261537	HCD	MS2	62.3264	50	31.6064	9811	9811	9810	0/0		1.47	772	0.001797	0.04601	0.15
1904247_Proteos_005.RAW	AF-M	Artificial Fingerprint	High	Sequest HT	Sequest HT (A2)	A	2	Unambiguous	SQYEQLAEQNRK	SQYEQLAEqNRK	Q9(Deamidated)	1	1	P13645	P13645	Keratin, type I cytoskeletal 10 OS=Homo sapiens OX=9606 GN=KRT10 PE=1 SV=6	1	3	3	0.012	0	1	1	1	498.911	1494.72	1494.72	0.05	3e-05	0	0	1655085	HCD	MS2	3.48355	50	31.6351	9819	9819	9818	0/0		3.34	2432	0.0007241	0.006186	0.453
1904247_Proteos_005.RAW	AF-M	Artificial Fingerprint	High	Sequest HT	Sequest HT (A2)	A	2	Unambiguous	SQYEQLAEQNRK	SQYEQLAEQnRK	N10(Deamidated)	1	1	P13645	P13645	Keratin, type I cytoskeletal 10 OS=Homo sapiens OX=9606 GN=KRT10 PE=1 SV=6	1	3	3		0.012	2	2	2	498.911	1494.72	1494.72	0.05	3e-05	0	0	1655085	HCD	MS2	3.48355	50	31.6351	9819	9819	9818	0/0		3.3	2432	0.0007241	0.006333	0.449
1904247_Proteos_005.RAW	AF-M	Artificial Fingerprint	High	Sequest HT	Sequest HT (A2)	A	2	Unambiguous	HGGGGGGFGGGGFGSR	HGGGGGGFGGGGFGSR		1	1	P35908	P35908	Keratin, type II cytoskeletal 2 epidermal OS=Homo sapiens OX=9606 GN=KRT2 PE=1 SV=2	0	3	3	0.0615	0	1	1	1	440.866	1320.58	1320.58	1.16	0.00051	0	0	114356	HCD	MS2	32.3687	50	31.8264	9895	9895	9894	0/0		1.3	1683	0.004031	0.07406	0.077
1904247_Proteos_005.RAW	AF-M	Artificial Fingerprint	High	Sequest HT	Sequest HT (A2)	A	2	Unambiguous	AEAESLYQSK	AEAESLYQSK		1	1	P04264	P04264	Keratin, type II cytoskeletal 1 OS=Homo sapiens OX=9606 GN=KRT1 PE=1 SV=6	0	2	2	0.5721	0	1	1	1	563.275	1125.54	1125.54	-0.07	-4e-05	0	0	22172360	HCD	MS2	8.94008	3.797	31.8446	9901	9901	9900	0/0		2.22	1394	0.002625	0.06593	0.095
1904247_Proteos_005.RAW	AF-M	Artificial Fingerprint	High	Sequest HT	Sequest HT (A2)	A	2	Unambiguous	FEMEQNLR	FEmEQNLR	M3(Oxidation)	1	1	P35527	P35527	Keratin, type I cytoskeletal 9 OS=Homo sapiens OX=9606 GN=KRT9 PE=1 SV=3	0	2	2	0.2321	0	1	1	1	541.75	1082.49	1082.49	-1.07	-0.00058	0	0	1979688	HCD	MS2	15.7944	32.904	31.9179	9923	9923	9922	0/0		1.68	1136	0.002625	0.06664	0.093
1904247_Proteos_005.RAW	AF-M	Artificial Fingerprint	High	Sequest HT	Sequest HT (A2)	A	2	Unambiguous	AEFAEVSK	AEFAEVSK		1	1	P02768	P02768	Serum albumin OS=Homo sapiens OX=9606 GN=ALB PE=1 SV=2	0	2	2	0.3952	0	1	1	1	440.724	880.441	880.441	0.22	0.0001	0	0	368895	HCD	MS2	26.6064	50	32.3891	10056	10056	10054	0/0		1.67	772	0.002625	0.05541	0.122
1904247_Proteos_005.RAW	AF-M	Artificial Fingerprint	High	Sequest HT	Sequest HT (A2)	A	2	Unambiguous	AEAESLYQSK	AEAESLYQSK		1	1	P04264	P04264	Keratin, type II cytoskeletal 1 OS=Homo sapiens OX=9606 GN=KRT1 PE=1 SV=6	0	2	2	0.5628	0	1	1	1	563.275	1125.54	1125.54	0.25	0.00014	0	0	5036394	HCD	MS2	10.4514	14.508	32.8515	10190	10190	10189	0/0		2.31	1460	0.0007241	0.01466	0.323
1904247_Proteos_005.RAW	AF-M	Artificial Fingerprint	High	Sequest HT	Sequest HT (A2)	A	2	Unambiguous	AQYEDIAQK	AQYEDIAQK		1	1	P04264	P04264	Keratin, type II cytoskeletal 1 OS=Homo sapiens OX=9606 GN=KRT1 PE=1 SV=6	0	2	2	0.318	0	1	1	1	533.265	1065.52	1065.52	0.74	0.00039	0	0	10581476	HCD	MS2	0.315181	6.972	32.9025	10205	10205	10204	0/0		2.17	956	0.003126	0.06949	0.087
1904247_Proteos_005.RAW	AF-M	Artificial Fingerprint	High	Sequest HT	Sequest HT (A2)	A	2	Unambiguous	FEMEQNLR	FEmEQNLR	M3(Oxidation)	1	1	P35527	P35527	Keratin, type I cytoskeletal 9 OS=Homo sapiens OX=9606 GN=KRT9 PE=1 SV=3	0	2	2	0.3022	0	1	1	1	541.75	1082.49	1082.49	-0.17	-9e-05	0	0	2.68548e+06	HCD	MS2	0.855634	26.856	32.934	10212	10212	10211	0/0		1.82	1255	0.004031	0.07179	0.082
1904247_Proteos_005.RAW	AF-M	Artificial Fingerprint	High	Sequest HT	Sequest HT (A2)	A	2	Unambiguous	DVDGAYMTK	DVDGAYmTK	M7(Oxidation)	1	1	P04264	P04264	Keratin, type II cytoskeletal 1 OS=Homo sapiens OX=9606 GN=KRT1 PE=1 SV=6	0	2	2	0.3357	0	1	1	1	508.224	1015.44	1015.44	0.38	0.00019	0	0	585827	HCD	MS2	1.46935	50	33.0209	10233	10233	10232	0/0		1.43	926	0.002625	0.06759	0.091
1904247_Proteos_005.RAW	AF-M	Artificial Fingerprint	High	Sequest HT	Sequest HT (A2)	A	2	Unambiguous	GGSGGSYGGGSGSGGGSGGGYGGGSGGGHSGGSGGGHSGGSGGNYGGGSGSGGGSGGGYGGGSGSR	GGSGGSYGGGSGSGGGSGGGYGGGSGGGHSGGSGGGHSGGSGGNYGGGSGSGGGSGGGYGGGSGSR		1	1	P35527	P35527	Keratin, type I cytoskeletal 9 OS=Homo sapiens OX=9606 GN=KRT9 PE=1 SV=3	0	4	4	0.2571	0	1	1	1	1243.99	4972.93	4972.94	-1.71	-0.00213	0	0	50095.5	HCD	MS2	0	50	33.0712	10243	10243	10242	0/0		2.1	1586	0.0007241	0.01002	0.38
1904247_Proteos_005.RAW	AF-M	Artificial Fingerprint	High	Sequest HT	Sequest HT (A2)	A	2	Unambiguous	YEELQQTAGR	YEELQQTAGR		1	1	P13647	P13647	Keratin, type II cytoskeletal 5 OS=Homo sapiens OX=9606 GN=KRT5 PE=1 SV=3	0	2	2	0.5192	0	1	1	1	597.791	1194.57	1194.57	-0.05	-3e-05	0	0	568456	HCD	MS2	2.8704	50	33.2227	10273	10273	10272	0/0		2.6	1275	0	0.002673	0.579
1904247_Proteos_005.RAW	AF-M	Artificial Fingerprint	High	Sequest HT	Sequest HT (A2)	A	2	Unambiguous	STMQELNSR	STMQELnSR	N7(Deamidated)	1	1	P35527	P35527	Keratin, type I cytoskeletal 9 OS=Homo sapiens OX=9606 GN=KRT9 PE=1 SV=3	0	2	2	0.264	0	1	1	1	533.746	1066.49	1066.48	1.81	0.00096	0	0	9129059	HCD	MS2	44.6568	5.985	33.7494	10395	10395	10393	0/0		1.97	1080	0.006305	0.0864	0.053
1904247_Proteos_005.RAW	AF-M	Artificial Fingerprint	High	Sequest HT	Sequest HT (A2)	A	2	Unambiguous	SLYGLGGSKR	SLYGLGGSKR		2	3	P04259; A0A0S2Z428	P04259; A0A0S2Z428; P48668	Keratin, type II cytoskeletal 6B OS=Homo sapiens OX=9606 GN=KRT6B PE=1 SV=5; HCG2039812 OS=Homo sapiens (Human) OX=9606 GN=KRT6A hCG_2039812; Keratin, type II cytoskeletal 6C OS=Homo sapiens OX=9606 GN=KRT6C PE=1 SV=3	1	2	2	0.6033	0	1	1	1	519.291	1037.57	1037.57	0.43	0.00022	0	0	638688	HCD	MS2	27.7686	50	33.839	10426	10426	10425	0/0		1.84	502	0.002625	0.05491	0.123
1904247_Proteos_005.RAW	AF-M	Artificial Fingerprint	High	Sequest HT	Sequest HT (A2)	A	2	Unambiguous	STMQELNSR	STmQELnSR	M3(Oxidation); N7(Deamidated)	1	1	P35527	P35527	Keratin, type I cytoskeletal 9 OS=Homo sapiens OX=9606 GN=KRT9 PE=1 SV=3	0	2	2	0.3377	0	1	1	1	541.743	1082.48	1082.48	1.29	0.0007	0	0	275936	HCD	MS2	7.81131	50	33.9428	10460	10460	10459	0/0		1.51	1105	0.001797	0.04189	0.164
1904247_Proteos_005.RAW	AF-M	Artificial Fingerprint	High	Sequest HT	Sequest HT (A2)	A	2	Unambiguous	NMQDMVEDYR	NmQDmVEDYR	M2(Oxidation); M5(Oxidation)	1	1	P04264	P04264	Keratin, type II cytoskeletal 1 OS=Homo sapiens OX=9606 GN=KRT1 PE=1 SV=6	0	2	2	0.1312	0	1	1	1	666.763	1332.52	1332.52	-0.11	-7e-05	0	0	763930	HCD	MS2	3.34747	50	34.178	10539	10539	10538	0/0		2.21	1030	0.0007241	0.005636	0.467
1904247_Proteos_005.RAW	AF-M	Artificial Fingerprint	High	Sequest HT	Sequest HT (A2)	A	2	Unambiguous	YEELQQTAGR	YEELQQTAGR		1	1	P13647	P13647	Keratin, type II cytoskeletal 5 OS=Homo sapiens OX=9606 GN=KRT5 PE=1 SV=3	0	2	2	0.4589	0	1	1	1	597.791	1194.58	1194.57	0.15	9e-05	0	0	114333	HCD	MS2	5.81596	50	34.2302	10559	10559	10558	0/0		1.46	1272	0.009708	0.1176	0.004
1904247_Proteos_005.RAW	AF-M	Artificial Fingerprint	High	Sequest HT	Sequest HT (A2)	A	2	Unambiguous	TKYEHELALR	TKYEHELALR		1	1	P08779	P08779	Keratin, type I cytoskeletal 16 OS=Homo sapiens OX=9606 GN=KRT16 PE=1 SV=4	1	3	3	0.2284	0	1	1	1	420.563	1259.67	1259.67	0.05	2e-05	0	0	92578.4	HCD	MS2	36.4452	50	34.3249	10589	10589	10586	0/0		1.62	1111	0.00363	0.07098	0.084
1904247_Proteos_005.RAW	AF-M	Artificial Fingerprint	High	Sequest HT	Sequest HT (A2)	A	2	Unambiguous	TMQNTSDLDTAR	TMQNTSDLDTAR		1	1	P14923	P14923	Junction plakoglobin OS=Homo sapiens OX=9606 GN=JUP PE=1 SV=3	0	2	2	0.5133	0	1	1	1	676.809	1352.61	1352.61	-0.13	-9e-05	0	0	88269	HCD	MS2	0	50	34.3262	10590	10590	10586	0/0		2.26	1753	0.0007241	0.01083	0.369
1904247_Proteos_005.RAW	AF-M	Artificial Fingerprint	High	Sequest HT	Sequest HT (A2)	A	2	Unambiguous	SNVSDAVAQSTR	SNVSDAVAQSTR		1	1	P60174	P60174	Triosephosphate isomerase OS=Homo sapiens OX=9606 GN=TPI1 PE=1 SV=3	0	2	2	0.6336	0	1	1	1	617.805	1234.6	1234.6	-0.1	-6e-05	0	0	646133	HCD	MS2	9.69676	50	34.3506	10599	10599	10598	0/0		2.92	1468	0	0.001011	0.725
1904247_Proteos_005.RAW	AF-M	Artificial Fingerprint	High	Sequest HT	Sequest HT (A2)	A	2	Unambiguous	ENGQPQNCGGQWR	ENGqPQNcGGQWR	Q4(Deamidated); C8(Carbamidomethyl)	1	1	Q5D862	Q5D862	Filaggrin-2 OS=Homo sapiens OX=9606 GN=FLG2 PE=1 SV=1	0	2	2	0.0702	0	1	1	1	766.321	1531.63	1531.63	-0.28	-0.00021	0	0	313773	HCD	MS2	0	50	34.4152	10626	10626	10625	0/0		2.42	2065	0.001797	0.03032	0.214
1904247_Proteos_005.RAW	AF-M	Artificial Fingerprint	High	Sequest HT	Sequest HT (A2)	A	2	Unambiguous	KLILDSAR	KLILDSAR		1	1	P29401	P29401	Transketolase OS=Homo sapiens OX=9606 GN=TKT PE=1 SV=3	1	2	2	0.1216	0	1	1	1	458.285	915.562	915.562	-0.08	-4e-05	0	0	106588	HCD	MS2	45.8665	50	34.4819	10654	10654	10653	0/0		1.48	504	0.004031	0.07146	0.083
1904247_Proteos_005.RAW	AF-M	Artificial Fingerprint	High	Sequest HT	Sequest HT (A2)	A	2	Unambiguous	AQYEDIAQK	AQYEDIAQK		1	1	P04264	P04264	Keratin, type II cytoskeletal 1 OS=Homo sapiens OX=9606 GN=KRT1 PE=1 SV=6	0	2	2	0.1012	0	1	1	2	533.265	1065.52	1065.52	0.85	0.00045	0	0	687456	HCD	MS2	47.1075	50	34.502	10661	10661	10660	0/0		1.68	956	0.002625	0.06657	0.094
1904247_Proteos_005.RAW	AF-M	Artificial Fingerprint	High	Sequest HT	Sequest HT (A2)	A	2	Unambiguous	TKYEHELALR	TKYEHELALR		1	1	P08779	P08779	Keratin, type I cytoskeletal 16 OS=Homo sapiens OX=9606 GN=KRT16 PE=1 SV=4	1	2	2	0.2788	0	1	1	1	630.341	1259.67	1259.67	0.08	5e-05	0	0	177212	HCD	MS2	40.5605	50	34.5034	10662	10662	10660	0/0		1.65	1086	0.006305	0.08858	0.049
1904247_Proteos_005.RAW	AF-M	Artificial Fingerprint	High	Sequest HT	Sequest HT (A2)	A	2	Unambiguous	TKFETEQALR	TKFETEQALR		1	2	Q04695	P08727; Q04695	Keratin, type I cytoskeletal 19 OS=Homo sapiens OX=9606 GN=KRT19 PE=1 SV=4; Keratin, type I cytoskeletal 17 OS=Homo sapiens OX=9606 GN=KRT17 PE=1 SV=2	1	2	2	0.2591	0	1	1	1	611.825	1222.64	1222.64	0.4	0.00024	0	0	217832	HCD	MS2	24.5721	50	34.5294	10676	10676	10672	0/0		1.93	1020	0.001797	0.04557	0.152
1904247_Proteos_005.RAW	AF-M	Artificial Fingerprint	High	Sequest HT	Sequest HT (A2)	A	2	Unambiguous	LDFGNSQGK	LDFGNSQGK		1	1	O75223	O75223	Gamma-glutamylcyclotransferase OS=Homo sapiens OX=9606 GN=GGCT PE=1 SV=1	0	2	2	0.2778	0	1	1	1	483.237	965.467	965.469	-1.4	-0.00068	0	0	552060	HCD	MS2	35.6912	50	34.5553	10690	10690	10687	0/0		1.44	793	0.001797	0.03778	0.18
1904247_Proteos_005.RAW	AF-M	Artificial Fingerprint	High	Sequest HT	Sequest HT (A2)	A	2	Unambiguous	QLEQLQGER	QLEQLQGER		1	1	Q8N1N4	Q8N1N4	Keratin, type II cytoskeletal 78 OS=Homo sapiens OX=9606 GN=KRT78 PE=1 SV=2	0	2	2	0.183	0	1	1	1	550.788	1100.57	1100.57	-0.18	-0.0001	0	0	394025	HCD	MS2	3.43174	50	34.5566	10691	10691	10687	0/0		2.35	914	0.0007241	0.02249	0.259
1904247_Proteos_005.RAW	AF-M	Artificial Fingerprint	High	Sequest HT	Sequest HT (A2)	A	2	Unambiguous	RTNAENEFVTIKK	RTNAEnEFVTIKK	N6(Deamidated)	1	1	P04264	P04264	Keratin, type II cytoskeletal 1 OS=Homo sapiens OX=9606 GN=KRT1 PE=1 SV=6	2	3	3	0.0935	0	1	1	1	517.611	1550.82	1550.82	-0.16	-8e-05	0	0	334101	HCD	MS2	14.2696	50	34.558	10692	10692	10687	0/0		3.1	1416	0.0007241	0.01441	0.326
1904247_Proteos_005.RAW	AF-M	Artificial Fingerprint	High	Sequest HT	Sequest HT (A2)	A	2	Selected	GLQDSIR	GLQDSIR		1	1	P15924	P15924	Desmoplakin OS=Homo sapiens OX=9606 GN=DSP PE=1 SV=3	0	2	2	0	0	1	1	1	394.717	788.426	788.426	0.13	5e-05	0	0	246309	HCD	MS2	31.036	50	34.7023	10752	10752	10751	0/0		1.43	1101	0.002625	0.05891	0.112
1904247_Proteos_005.RAW	AF-M	Artificial Fingerprint	High	Sequest HT	Sequest HT (A2)	A	2	Rejected	VAQNSIR	VAQnSIR	N4(Deamidated)	0	1		O75027	ATP-binding cassette sub-family B member 7, mitochondrial OS=Homo sapiens OX=9606 GN=ABCB7 PE=1 SV=2	0	2	2		0	2	2	2	394.717	788.426	788.426	0.13	5e-05	0	0	246309	HCD	MS2	31.036	50	34.7023	10752	10752	10751	0/0		1.43	1101	0.002625	0.05933	0.111
1904247_Proteos_005.RAW	AF-M	Artificial Fingerprint	High	Sequest HT	Sequest HT (A2)	A	2	Unambiguous	DVDGAYMTK	DVDGAYmTK	M7(Oxidation)	1	1	P04264	P04264	Keratin, type II cytoskeletal 1 OS=Homo sapiens OX=9606 GN=KRT1 PE=1 SV=6	0	2	2	0.2713	0	1	1	1	508.224	1015.44	1015.44	0.02	1e-05	0	0	605447	HCD	MS2	1.33008	50	35.031	10851	10851	10850	0/0		1.29	926	0.00493	0.08	0.065
1904247_Proteos_005.RAW	AF-M	Artificial Fingerprint	High	Sequest HT	Sequest HT (A2)	A	2	Unambiguous	NHYNEEMSNLR	NHYNEEMSNLR		1	1	P15924	P15924	Desmoplakin OS=Homo sapiens OX=9606 GN=DSP PE=1 SV=3	0	3	3	0.4485	0	1	1	1	469.542	1406.61	1406.61	0.23	0.00011	0	0	90432.2	HCD	MS2	36.9541	50	35.5369	10984	10984	10982	0/0		1.65	1940	0.002625	0.06144	0.106
1904247_Proteos_005.RAW	AF-M	Artificial Fingerprint	High	Sequest HT	Sequest HT (A2)	A	2	Unambiguous	IVYVEEK	IVYVEEK		1	1	P22735	P22735	Protein-glutamine gamma-glutamyltransferase K OS=Homo sapiens OX=9606 GN=TGM1 PE=1 SV=4	0	2	2	0.1852	0	1	1	1	440.245	879.483	879.482	0.78	0.00034	0	0	210385	HCD	MS2	19.3624	50	35.612	11007	11007	11006	0/0		1.08	475	0.002625	0.06536	0.096
1904247_Proteos_005.RAW	AF-M	Artificial Fingerprint	High	Sequest HT	Sequest HT (A2)	A	2	Unambiguous	VGFAEAAR	VGFAEAAR		1	1	P07339	P07339	Cathepsin D OS=Homo sapiens OX=9606 GN=CTSD PE=1 SV=1	0	2	2	0.4577	0	1	1	1	410.719	820.431	820.431	-0.05	-2e-05	0	0	476099	HCD	MS2	11.789	50	35.6287	11013	11013	11012	0/0		2.01	699	0.0007241	0.01532	0.317
1904247_Proteos_005.RAW	AF-M	Artificial Fingerprint	High	Sequest HT	Sequest HT (A2)	A	2	Unambiguous	SLLEGEGSSGGGGR	SLLEGEGSSGGGGR		1	1	P13645	P13645	Keratin, type I cytoskeletal 10 OS=Homo sapiens OX=9606 GN=KRT10 PE=1 SV=6	0	2	2	0.3284	0	1	1	1	631.803	1262.6	1262.6	0.65	0.00041	0	0	139731	HCD	MS2	17.5227	50	35.6406	11019	11019	11018	0/0		2.04	1609	0.002625	0.05899	0.112
1904247_Proteos_005.RAW	AF-M	Artificial Fingerprint	High	Sequest HT	Sequest HT (A2)	A	2	Unambiguous	RTNAENEFVTIKK	RTNAENEFVTIKK		1	1	P04264	P04264	Keratin, type II cytoskeletal 1 OS=Homo sapiens OX=9606 GN=KRT1 PE=1 SV=6	2	3	3	0.5474	0	1	1	1	517.282	1549.83	1549.83	-2.04	-0.00106	0	0	214686	HCD	MS2	10.0986	50	35.7423	11057	11057	11054	0/0		2.74	1117	0.001797	0.03441	0.194
1904247_Proteos_005.RAW	AF-M	Artificial Fingerprint	High	Sequest HT	Sequest HT (A2)	A	2	Unambiguous	NHEEEMLALR	NHEEEmLALR	M6(Oxidation)	1	1	P08779	P08779	Keratin, type I cytoskeletal 16 OS=Homo sapiens OX=9606 GN=KRT16 PE=1 SV=4	0	3	3	0.2273	0	1	1	1	419.868	1257.59	1257.59	-0.3	-0.00012	0	0	263029	HCD	MS2	48.5463	50	35.7764	11074	11074	11071	0/0		1.76	1779	0.002625	0.06175	0.105
1904247_Proteos_005.RAW	AF-M	Artificial Fingerprint	High	Sequest HT	Sequest HT (A2)	A	2	Unambiguous	AQYEDIAQK	AQYEDIAQK		1	1	P04264	P04264	Keratin, type II cytoskeletal 1 OS=Homo sapiens OX=9606 GN=KRT1 PE=1 SV=6	0	2	2	0.2909	0	1	1	1	533.265	1065.52	1065.52	1.42	0.00076	0	0	205129	HCD	MS2	54.8619	50	35.8065	11087	11087	11086	0/0		1.65	1024	0.002625	0.06431	0.099
1904247_Proteos_005.RAW	AF-M	Artificial Fingerprint	High	Sequest HT	Sequest HT (A2)	A	2	Unambiguous	VITNFNSAHDTDR	VITNFNSAHDTDR		1	1	Q08188	Q08188	Protein-glutamine gamma-glutamyltransferase E OS=Homo sapiens OX=9606 GN=TGM3 PE=1 SV=4	0	3	3	0.4235	0	1	1	1	497.239	1489.7	1489.7	-0.09	-5e-05	0	0	446317	HCD	MS2	4.22649	50	35.8092	11089	11089	11086	0/0		1.96	2477	0.0007241	0.01825	0.29
1904247_Proteos_005.RAW	AF-M	Artificial Fingerprint	High	Sequest HT	Sequest HT (A2)	A	2	Unambiguous	DVDGAYMTK	DVDGAYmTK	M7(Oxidation)	1	1	P04264	P04264	Keratin, type II cytoskeletal 1 OS=Homo sapiens OX=9606 GN=KRT1 PE=1 SV=6	0	2	2	0.5027	0	1	1	1	508.224	1015.44	1015.44	0.62	0.00032	0	0	691781	HCD	MS2	0	50	36.0369	11177	11177	11176	0/0		1.85	920	0.002625	0.05186	0.132
1904247_Proteos_005.RAW	AF-M	Artificial Fingerprint	High	Sequest HT	Sequest HT (A2)	A	2	Unambiguous	GGGGGGYGSGGSSYGSGGGSYGSGGGGGGGR	GGGGGGYGSGGSSYGSGGGSYGSGGGGGGGR		1	1	P04264	P04264	Keratin, type II cytoskeletal 1 OS=Homo sapiens OX=9606 GN=KRT1 PE=1 SV=6	0	2	2	0.6353	0	1	1	1	1192.48	2383.95	2383.95	1.17	0.0014	0	0	76580.6	HCD	MS2	0	50	36.1546	11225	11225	11221	0/0		2.55	4264	0.0007241	0.01557	0.314
1904247_Proteos_005.RAW	AF-M	Artificial Fingerprint	High	Sequest HT	Sequest HT (A2)	A	2	Unambiguous	SLLEGEGSSGGGGR	SLLEGEGSSGGGGR		1	1	P13645	P13645	Keratin, type I cytoskeletal 10 OS=Homo sapiens OX=9606 GN=KRT10 PE=1 SV=6	0	2	2	0.4245	0	1	1	1	631.802	1262.6	1262.6	-0.03	-2e-05	0	0	1.55524e+06	HCD	MS2	3.58918	50	36.6516	11420	11420	11419	0/0		2.78	1606	0.0007241	0.005739	0.464
1904247_Proteos_005.RAW	AF-M	Artificial Fingerprint	High	Sequest HT	Sequest HT (A2)	A	2	Unambiguous	LPVEEAYKR	LPVEEAYKR		1	1	P15924	P15924	Desmoplakin OS=Homo sapiens OX=9606 GN=DSP PE=1 SV=3	1	2	2	0.4698	0	1	1	1	552.806	1104.61	1104.6	0.77	0.00043	0	0	302662	HCD	MS2	29.4852	50	36.7531	11452	11452	11449	0/0		2.15	764	0.001797	0.0441	0.157
1904247_Proteos_005.RAW	AF-M	Artificial Fingerprint	High	Sequest HT	Sequest HT (A2)	A	2	Unambiguous	AQYEDIAQK	AQYEDIAQK		1	1	P04264	P04264	Keratin, type II cytoskeletal 1 OS=Homo sapiens OX=9606 GN=KRT1 PE=1 SV=6	0	2	2	0.2903	0	1	1	1	533.265	1065.52	1065.52	0.85	0.00045	0	0	228724	HCD	MS2	7.85446	50	36.8149	11472	11472	11471	0/0		1.86	956	0.0007241	0.02303	0.255
1904247_Proteos_005.RAW	AF-M	Artificial Fingerprint	High	Sequest HT	Sequest HT (A2)	A	2	Unambiguous	TLLEGEESR	TLLEGEESR		1	1	P04264	P04264	Keratin, type II cytoskeletal 1 OS=Homo sapiens OX=9606 GN=KRT1 PE=1 SV=6	0	2	2	0.2838	0	1	1	1	517.262	1033.52	1033.52	0.36	0.00019	0	0	910252	HCD	MS2	0	50	36.836	11482	11482	11481	0/0		2.22	1089	0.0007241	0.007575	0.423
1904247_Proteos_005.RAW	AF-M	Artificial Fingerprint	High	Sequest HT	Sequest HT (A2)	A	2	Unambiguous	EELAYLKK	EELAYLKK		2	3	P02533; Q04695	P02533; P08727; Q04695	Keratin, type I cytoskeletal 14 OS=Homo sapiens OX=9606 GN=KRT14 PE=1 SV=4; Keratin, type I cytoskeletal 19 OS=Homo sapiens OX=9606 GN=KRT19 PE=1 SV=4; Keratin, type I cytoskeletal 17 OS=Homo sapiens OX=9606 GN=KRT17 PE=1 SV=2	1	2	2	0.377	0	1	1	1	497.284	993.561	993.562	-0.75	-0.00037	0	0	244083	HCD	MS2	22.6169	50	36.9286	11527	11527	11526	0/0		1.83	370	0.002625	0.05038	0.136
1904247_Proteos_005.RAW	AF-M	Artificial Fingerprint	High	Sequest HT	Sequest HT (A2)	A	2	Unambiguous	GGGGGGYGSGGSSYGSGGGSYGSGGGGGGGR	GGGGGGYGSGGSSYGSGGGSYGSGGGGGGGR		1	1	P04264	P04264	Keratin, type II cytoskeletal 1 OS=Homo sapiens OX=9606 GN=KRT1 PE=1 SV=6	0	3	3	0.5181	0	1	1	1	795.323	2383.95	2383.95	0.78	0.00062	0	0	399360	HCD	MS2	67.6516	50	37.1288	11596	11596	11595	0/0		2.76	4191	0.0007241	0.01427	0.327
1904247_Proteos_005.RAW	AF-M	Artificial Fingerprint	High	Sequest HT	Sequest HT (A2)	A	2	Unambiguous	GGGGGGYGSGGSSYGSGGGSYGSGGGGGGGR	GGGGGGYGSGGSSYGSGGGSYGSGGGGGGGR		1	1	P04264	P04264	Keratin, type II cytoskeletal 1 OS=Homo sapiens OX=9606 GN=KRT1 PE=1 SV=6	0	2	2	0.6358	0	1	1	1	1192.48	2383.95	2383.95	0.76	0.00091	0	0	170511	HCD	MS2	0	50	37.1636	11605	11605	11604	0/0		3.13	4191	0	0.0005736	0.81
1904247_Proteos_005.RAW	AF-M	Artificial Fingerprint	High	Sequest HT	Sequest HT (A2)	A	2	Unambiguous	NMQDMVEDYR	NmQDmVEDYR	M2(Oxidation); M5(Oxidation)	1	1	P04264	P04264	Keratin, type II cytoskeletal 1 OS=Homo sapiens OX=9606 GN=KRT1 PE=1 SV=6	0	2	2	0.2733	0	1	1	1	666.762	1332.52	1332.52	-2.31	-0.00154	0	0	144009	HCD	MS2	14.0198	50	37.1927	11613	11613	11612	0/0		1.72	984	0.002625	0.06042	0.108
1904247_Proteos_005.RAW	AF-M	Artificial Fingerprint	High	Sequest HT	Sequest HT (A2)	A	2	Unambiguous	LASYLDK	LASYLDK		5	8	P02533; P13645; Q04695; P35527; P08779	P02533; P08727; P13645; P19012; Q99456; Q04695; P35527; P08779	Keratin, type I cytoskeletal 14 OS=Homo sapiens OX=9606 GN=KRT14 PE=1 SV=4; Keratin, type I cytoskeletal 19 OS=Homo sapiens OX=9606 GN=KRT19 PE=1 SV=4; Keratin, type I cytoskeletal 10 OS=Homo sapiens OX=9606 GN=KRT10 PE=1 SV=6; Keratin, type I cytoskeletal 15 OS=Homo sapiens OX=9606 GN=KRT15 PE=1 SV=3; Keratin, type I cytoskeletal 12 OS=Homo sapiens OX=9606 GN=KRT12 PE=1 SV=1; Keratin, type I cyt…	0	2	2	0.194	0	1	1	1	405.223	809.44	809.44	-0.89	-0.00036	0	0	240349	HCD	MS2	17.1632	50	37.397	11668	11668	11666	0/0		1.34	443	0.001797	0.03122	0.209
1904247_Proteos_005.RAW	AF-M	Artificial Fingerprint	High	Sequest HT	Sequest HT (A2)	A	2	Unambiguous	RGGPGPGMMCGAVNNLLSDTEEDDK	RGGPGPGMmcGAVNnLLSDtEEDDK	M9(Oxidation); C10(Carbamidomethyl); N15(Deamidated); T20(Phospho)	1	1	Q15878	Q15878	Voltage-dependent R-type calcium channel subunit alpha-1E OS=Homo sapiens OX=9606 GN=CACNA1E PE=1 SV=3	1	3	3	0.0053	0	1	1	1	906.366	2717.08	2717.09	-2.03	-0.00184	0	0	1.3488e+06	HCD	MS2	3.39379	50	37.6476	11744	11744	11743	0/0		3.77	4816	0.002625	0.0503	0.137
1904247_Proteos_005.RAW	AF-M	Artificial Fingerprint	High	Sequest HT	Sequest HT (A2)	A	2	Unambiguous	RGGPGPGMMCGAVNNLLSDTEEDDK	RGGPGPGMmcGAVnNLLSDtEEDDK	M9(Oxidation); C10(Carbamidomethyl); N14(Deamidated); T20(Phospho)	1	1	Q15878	Q15878	Voltage-dependent R-type calcium channel subunit alpha-1E OS=Homo sapiens OX=9606 GN=CACNA1E PE=1 SV=3	1	3	3		0.0053	2	2	2	906.366	2717.08	2717.09	-2.03	-0.00184	0	0	1.3488e+06	HCD	MS2	3.39379	50	37.6476	11744	11744	11743	0/0		3.75	4816	0.002625	0.05423	0.125
1904247_Proteos_005.RAW	AF-M	Artificial Fingerprint	High	Sequest HT	Sequest HT (A2)	A	2	Unambiguous	AEAEALYQTK	AEAEALYQTK		1	6	Q8N1N4	Q7RTS7; Q86Y46; P12035; Q3SY84; P19013; Q8N1N4	Keratin, type II cytoskeletal 74 OS=Homo sapiens OX=9606 GN=KRT74 PE=1 SV=2; Keratin, type II cytoskeletal 73 OS=Homo sapiens OX=9606 GN=KRT73 PE=1 SV=1; Keratin, type II cytoskeletal 3 OS=Homo sapiens OX=9606 GN=KRT3 PE=1 SV=3; Keratin, type II cytoskeletal 71 OS=Homo sapiens OX=9606 GN=KRT71 PE=1 SV=3; Keratin, type II cytoskeletal 4 OS=Homo sapiens OX=9606 GN=KRT4 PE=1 SV=4; Keratin, type II c…	0	2	2	0.2347	0	1	1	1	562.286	1123.57	1123.56	2.01	0.00113	0	0	326198	HCD	MS2	30.914	50	37.6493	11745	11745	11743	0/0		2.13	1152	0.001797	0.03719	0.183
1904247_Proteos_005.RAW	AF-M	Artificial Fingerprint	High	Sequest HT	Sequest HT (A2)	A	2	Unambiguous	SLLEGEGSSGGGGR	SLLEGEGSSGGGGR		1	1	P13645	P13645	Keratin, type I cytoskeletal 10 OS=Homo sapiens OX=9606 GN=KRT10 PE=1 SV=6	0	2	2	0.4523	0	1	1	1	631.802	1262.6	1262.6	-0.13	-8e-05	0	0	265788	HCD	MS2	14.6807	50	37.6556	11747	11747	11746	0/0		1.99	1565	0.001797	0.04433	0.156
1904247_Proteos_005.RAW	AF-M	Artificial Fingerprint	High	Sequest HT	Sequest HT (A2)	A	2	Unambiguous	VTMQNLNDR	VTMQNLNDR		3	7	P02533; P13645; P08779	P02533; Q7Z3Y7; P13645; Q7Z3Y9; Q7Z3Z0; Q7Z3Y8; P08779	Keratin, type I cytoskeletal 14 OS=Homo sapiens OX=9606 GN=KRT14 PE=1 SV=4; Keratin, type I cytoskeletal 28 OS=Homo sapiens OX=9606 GN=KRT28 PE=1 SV=2; Keratin, type I cytoskeletal 10 OS=Homo sapiens OX=9606 GN=KRT10 PE=1 SV=6; Keratin, type I cytoskeletal 26 OS=Homo sapiens OX=9606 GN=KRT26 PE=1 SV=2; Keratin, type I cytoskeletal 25 OS=Homo sapiens OX=9606 GN=KRT25 PE=1 SV=1; Keratin, type I cyt…	0	2	2	0.4363	0	1	1	1	545.769	1090.53	1090.53	-0.03	-2e-05	0	0	2.01371e+06	HCD	MS2	1.38118	44.217	37.826	11794	11794	11793	0/0		2.59	1227	0.0007241	0.007226	0.43
1904247_Proteos_005.RAW	AF-M	Artificial Fingerprint	High	Sequest HT	Sequest HT (A2)	A	2	Unambiguous	TLLEGEESR	TLLEGEESR		1	1	P04264	P04264	Keratin, type II cytoskeletal 1 OS=Homo sapiens OX=9606 GN=KRT1 PE=1 SV=6	0	2	2	0.2778	0	1	1	1	517.262	1033.52	1033.52	0.72	0.00037	0	0	36134820	HCD	MS2	0.54681	2.295	37.8461	11802	11802	11801	0/0		2.16	1089	0.0007241	0.01524	0.317
1904247_Proteos_005.RAW	AF-M	Artificial Fingerprint	High	Sequest HT	Sequest HT (A2)	A	2	Unambiguous	SLVNLGGSK	SLVNLGGSK		1	1	P04264	P04264	Keratin, type II cytoskeletal 1 OS=Homo sapiens OX=9606 GN=KRT1 PE=1 SV=6	0	2	2	0.3007	0	1	1	1	437.753	874.499	874.499	0.21	9e-05	0	0	179443	HCD	MS2	44.9487	50	37.9208	11828	11828	11827	0/0		1.43	869	0.001797	0.03559	0.189
1904247_Proteos_005.RAW	AF-M	Artificial Fingerprint	High	Sequest HT	Sequest HT (A2)	A	2	Unambiguous	QAPTWPSK	QAPTWPSK		1	1	P23490	P23490	Loricrin OS=Homo sapiens OX=9606 GN=LOR PE=1 SV=2	0	2	2	0.3936	0	1	1	1	457.74	914.473	914.473	-0.17	-8e-05	0	0	315611	HCD	MS2	4.34453	50	38.0344	11864	11864	11863	0/0		1.88	476	0.001797	0.0345	0.194
1904247_Proteos_005.RAW	AF-M	Artificial Fingerprint	High	Sequest HT	Sequest HT (A2)	A	2	Unambiguous	GGGGGGYGSGGSSYGSGGGSYGSGGGGGGGR	GGGGGGYGSGGSSYGSGGGSYGSGGGGGGGR		1	1	P04264	P04264	Keratin, type II cytoskeletal 1 OS=Homo sapiens OX=9606 GN=KRT1 PE=1 SV=6	0	3	3	0.2785	0	1	1	1	795.322	2383.95	2383.95	-0.45	-0.00036	0	0	117544	HCD	MS2	0	50	38.1312	11894	11894	11893	0/0		1.58	4063	0.009708	0.1075	0.019
1904247_Proteos_005.RAW	AF-M	Artificial Fingerprint	High	Sequest HT	Sequest HT (A2)	A	2	Unambiguous	GRHGSGSGQSSSYSPYGSGSGWSSSR	GRHGSGSGQSSSYSPYGSGSGWSSSR		1	1	Q86YZ3	Q86YZ3	Hornerin OS=Homo sapiens OX=9606 GN=HRNR PE=1 SV=2	1	4	4	0.3953	0	1	1	1	641.281	2562.1	2562.1	2.07	0.00133	0	0	113153	HCD	MS2	12.7752	50	38.559	12013	12013	12011	0/0		2.53	7923	0.0007241	0.01571	0.313
1904247_Proteos_005.RAW	AF-M	Artificial Fingerprint	High	Sequest HT	Sequest HT (A2)	A	2	Unambiguous	EVATNSELVQSGK	EVATNSELVQSGK		2	2	P02533; Q04695	P02533; Q04695	Keratin, type I cytoskeletal 14 OS=Homo sapiens OX=9606 GN=KRT14 PE=1 SV=4; Keratin, type I cytoskeletal 17 OS=Homo sapiens OX=9606 GN=KRT17 PE=1 SV=2	0	2	2	0.3861	0	1	1	1	681.349	1361.69	1361.69	-0.07	-5e-05	0	0	2.61452e+06	HCD	MS2	47.7831	50	38.734	12079	12079	12071	0/0		2.59	1738	0.0007241	0.01691	0.302
1904247_Proteos_005.RAW	AF-M	Artificial Fingerprint	High	Sequest HT	Sequest HT (A2)	A	2	Unambiguous	SHQSSYGQHGSGSSQSSGYGQHGSSSGQTFGFGQHR	SHQSSYGQHGSGSSQSSGYGQHGSSSGQTFGFGqHR	Q34(Deamidated)	1	1	Q5D862	Q5D862	Filaggrin-2 OS=Homo sapiens OX=9606 GN=FLG2 PE=1 SV=1	0	5	5	0.1216	0	1	1	1	737.715	3684.55	3684.55	-0.27	-0.0002	0	0	156123	HCD	MS2	2.28767	50	38.7416	12082	12082	12080	0/0		2.22	9082	0.002625	0.06353	0.101
1904247_Proteos_005.RAW	AF-M	Artificial Fingerprint	High	Sequest HT	Sequest HT (A2)	A	2	Unambiguous	TNQELQEINR	TNQELQEINR		1	2	A6NMY6	A6NMY6; P07355	Putative annexin A2-like protein OS=Homo sapiens OX=9606 GN=ANXA2P2 PE=5 SV=2; Annexin A2 OS=Homo sapiens OX=9606 GN=ANXA2 PE=1 SV=2	0	2	2	0.3136	0	1	1	1	622.816	1244.62	1244.62	0.8	0.0005	0	0	268619	HCD	MS2	12.0142	50	38.7443	12084	12084	12080	0/0		2.36	1561	0.0007241	0.00591	0.46
1904247_Proteos_005.RAW	AF-M	Artificial Fingerprint	High	Sequest HT	Sequest HT (A2)	A	2	Unambiguous	EVATNSELVQSGK	EVATNSELVQSGK		2	2	P02533; Q04695	P02533; Q04695	Keratin, type I cytoskeletal 14 OS=Homo sapiens OX=9606 GN=KRT14 PE=1 SV=4; Keratin, type I cytoskeletal 17 OS=Homo sapiens OX=9606 GN=KRT17 PE=1 SV=2	0	2	2	0.5762	0	1	1	1	681.349	1361.69	1361.69	-0.16	-0.00011	0	0	8.00409e+06	HCD	MS2	16.1659	15.546	38.795	12114	12114	12111	0/0		3.61	1735	0.0007241	0.003325	0.546
1904247_Proteos_005.RAW	AF-M	Artificial Fingerprint	High	Sequest HT	Sequest HT (A2)	A	2	Unambiguous	VGEAAHALGNTGHEIGR	VGEAAHALGNTGHEIGR		1	1	Q6E0U4	Q6E0U4	Dermokine OS=Homo sapiens OX=9606 GN=DMKN PE=1 SV=3	0	3	3	0.5508	0	1	1	1	563.62	1688.85	1688.85	-0.63	-0.00035	0	0	219568	HCD	MS2	0	50	38.8212	12127	12127	12124	0/0		3.25	2588	0	0.0001812	0.984
1904247_Proteos_005.RAW	AF-M	Artificial Fingerprint	High	Sequest HT	Sequest HT (A2)	A	2	Unambiguous	FGQGAHHGLSEGWK	FGQGAHHGLSEGWK		1	1	Q6UWP8	Q6UWP8	Suprabasin OS=Homo sapiens OX=9606 GN=SBSN PE=1 SV=2	0	3	3	0.3304	0	1	1	1	504.244	1510.72	1510.72	-0.66	-0.00033	0	0	888151	HCD	MS2	12.7334	50	38.8318	12132	12132	12130	0/0		2.24	2714	0.001406	0.02725	0.23
1904247_Proteos_005.RAW	AF-M	Artificial Fingerprint	High	Sequest HT	Sequest HT (A2)	A	2	Unambiguous	TLLEGEESR	TLLEGEESR		1	1	P04264	P04264	Keratin, type II cytoskeletal 1 OS=Homo sapiens OX=9606 GN=KRT1 PE=1 SV=6	0	2	2	0.2706	0	1	1	1	517.262	1033.52	1033.52	0.95	0.00049	0	0	3.74344e+06	HCD	MS2	1.14855	24.164	38.8509	12141	12141	12140	0/0		2.18	1078	0.0007241	0.02087	0.27
1904247_Proteos_005.RAW	AF-M	Artificial Fingerprint	High	Sequest HT	Sequest HT (A2)	A	2	Unambiguous	AQHVFQHAVPQEGKPITNQK	AQHVFQHAVPQEGKPITNQK		1	1	Q13867	Q13867	Bleomycin hydrolase OS=Homo sapiens OX=9606 GN=BLMH PE=1 SV=1	0	4	4	0.429	0	1	1	1	565.051	2257.18	2257.18	-1.46	-0.00083	0	0	430062	HCD	MS2	9.12813	50	38.9853	12196	12196	12194	0/0		3.31	2260	0.0007241	0.01344	0.336
1904247_Proteos_005.RAW	AF-M	Artificial Fingerprint	High	Sequest HT	Sequest HT (A2)	A	2	Unambiguous	EVATNSELVQSGK	EVATNSELVQSGK		2	2	P02533; Q04695	P02533; Q04695	Keratin, type I cytoskeletal 14 OS=Homo sapiens OX=9606 GN=KRT14 PE=1 SV=4; Keratin, type I cytoskeletal 17 OS=Homo sapiens OX=9606 GN=KRT17 PE=1 SV=2	0	2	2	0.494	0	1	1	1	681.348	1361.69	1361.69	-0.88	-0.0006	0	0	184478	HCD	MS2	28.6375	50	39.8011	12432	12432	12431	0/0		2.51	1724	0	0.000788	0.763
1904247_Proteos_005.RAW	AF-M	Artificial Fingerprint	High	Sequest HT	Sequest HT (A2)	A	2	Unambiguous	TLLEGEESR	TLLEGEESR		1	1	P04264	P04264	Keratin, type II cytoskeletal 1 OS=Homo sapiens OX=9606 GN=KRT1 PE=1 SV=6	0	2	2	0.2231	0	1	1	1	517.262	1033.52	1033.52	0.25	0.00013	0	0	1.30661e+06	HCD	MS2	2.3339	50	39.8529	12443	12443	12442	0/0		2.42	1089	0.0007241	0.006789	0.439
1904247_Proteos_005.RAW	AF-M	Artificial Fingerprint	High	Sequest HT	Sequest HT (A2)	A	2	Unambiguous	GFSSGSAVVSGGSR	GFSSGSAVVSGGSR		1	1	P35908	P35908	Keratin, type II cytoskeletal 2 epidermal OS=Homo sapiens OX=9606 GN=KRT2 PE=1 SV=2	0	2	2	0.622	0	1	1	1	627.807	1254.61	1254.61	0.13	8e-05	0	0	288192	HCD	MS2	6.13692	50	39.8916	12455	12455	12454	0/0		2.46	1779	0.0007241	0.009024	0.396
1904247_Proteos_005.RAW	AF-M	Artificial Fingerprint	High	Sequest HT	Sequest HT (A2)	A	2	Unambiguous	VLLQEEGTR	VLLQEEGTR		1	1	P15924	P15924	Desmoplakin OS=Homo sapiens OX=9606 GN=DSP PE=1 SV=3	0	2	2	0.4384	0	1	1	1	522.788	1044.57	1044.57	0.12	6e-05	0	0	2.72808e+06	HCD	MS2	1.89629	25.929	39.9693	12480	12480	12479	0/0		2.19	892	0.0007241	0.0144	0.326
1904247_Proteos_005.RAW	AF-M	Artificial Fingerprint	High	Sequest HT	Sequest HT (A2)	A	2	Unambiguous	NMQDMVEDYR	NmQDmVEDYR	M2(Oxidation); M5(Oxidation)	1	1	P04264	P04264	Keratin, type II cytoskeletal 1 OS=Homo sapiens OX=9606 GN=KRT1 PE=1 SV=6	0	2	2	0.2153	0	1	1	1	666.763	1332.52	1332.52	-0.11	-7e-05	0	0	135590	HCD	MS2	19.2179	50	40.2088	12565	12565	12564	0/0		1.44	1030	0.002625	0.06187	0.105
1904247_Proteos_005.RAW	AF-M	Artificial Fingerprint	High	Sequest HT	Sequest HT (A2)	A	2	Unambiguous	ISSVLAGGSCR	ISSVLAGGScR	C10(Carbamidomethyl)	2	2	P02533; P08779	P02533; P08779	Keratin, type I cytoskeletal 14 OS=Homo sapiens OX=9606 GN=KRT14 PE=1 SV=4; Keratin, type I cytoskeletal 16 OS=Homo sapiens OX=9606 GN=KRT16 PE=1 SV=4	0	2	2	0.5434	0	1	1	1	553.785	1106.56	1106.56	0.03	2e-05	0	0	719474	HCD	MS2	45.2352	50	40.2387	12577	12577	12574	0/0		2.65	1112	0.0007241	0.007958	0.415
1904247_Proteos_005.RAW	AF-M	Artificial Fingerprint	High	Sequest HT	Sequest HT (A2)	A	2	Unambiguous	VDPEIQNVK	VDPEIQNVK		1	1	P35908	P35908	Keratin, type II cytoskeletal 2 epidermal OS=Homo sapiens OX=9606 GN=KRT2 PE=1 SV=2	0	2	2	0.3911	0	1	1	1	521.283	1041.56	1041.56	0.27	0.00014	0	0	1.85565e+06	HCD	MS2	3.5856	48.027	40.3144	12605	12605	12604	0/0		2.02	507	0.001797	0.04622	0.15
1904247_Proteos_005.RAW	AF-M	Artificial Fingerprint	High	Sequest HT	Sequest HT (A2)	A	2	Unambiguous	LASYLDK	LASYLDK		5	8	P02533; P13645; Q04695; P35527; P08779	P02533; P08727; P13645; P19012; Q99456; Q04695; P35527; P08779	Keratin, type I cytoskeletal 14 OS=Homo sapiens OX=9606 GN=KRT14 PE=1 SV=4; Keratin, type I cytoskeletal 19 OS=Homo sapiens OX=9606 GN=KRT19 PE=1 SV=4; Keratin, type I cytoskeletal 10 OS=Homo sapiens OX=9606 GN=KRT10 PE=1 SV=6; Keratin, type I cytoskeletal 15 OS=Homo sapiens OX=9606 GN=KRT15 PE=1 SV=3; Keratin, type I cytoskeletal 12 OS=Homo sapiens OX=9606 GN=KRT12 PE=1 SV=1; Keratin, type I cyt…	0	2	2	0.2114	0	1	1	1	405.224	809.44	809.44	-0.14	-6e-05	0	0	739214	HCD	MS2	11.0414	50	40.4124	12641	12641	12640	0/0		1.75	446	0.002625	0.04878	0.141
1904247_Proteos_005.RAW	AF-M	Artificial Fingerprint	High	Sequest HT	Sequest HT (A2)	A	2	Unambiguous	ASLENSLEETKGR	ASLENSLEETKGR		2	2	P02533; P08779	P02533; P08779	Keratin, type I cytoskeletal 14 OS=Homo sapiens OX=9606 GN=KRT14 PE=1 SV=4; Keratin, type I cytoskeletal 16 OS=Homo sapiens OX=9606 GN=KRT16 PE=1 SV=4	1	3	3	0.3794	0	1	1	1	478.579	1433.72	1433.72	0.1	5e-05	0	0	371364	HCD	MS2	42.3829	50	40.5517	12694	12694	12693	0/0		2.53	1730	0.0007241	0.01164	0.358
1904247_Proteos_005.RAW	AF-M	Artificial Fingerprint	High	Sequest HT	Sequest HT (A2)	A	2	Unambiguous	ASLENSLEETKGR	ASLENSLEETKGR		2	2	P02533; P08779	P02533; P08779	Keratin, type I cytoskeletal 14 OS=Homo sapiens OX=9606 GN=KRT14 PE=1 SV=4; Keratin, type I cytoskeletal 16 OS=Homo sapiens OX=9606 GN=KRT16 PE=1 SV=4	1	2	2	0.2174	0	1	1	1	717.365	1433.72	1433.72	-0.25	-0.00018	0	0	64103.9	HCD	MS2	10.7714	50	40.5836	12703	12703	12702	0/0		1.38	1759	0.00793	0.09788	0.033
1904247_Proteos_005.RAW	AF-M	Artificial Fingerprint	High	Sequest HT	Sequest HT (A2)	A	2	Unambiguous	DVDAAYMNK	DVDAAYMNK		3	6	P04259; A0A0S2Z428; P13647	P04259; A0A0S2Z428; O95678; P48668; Q14CN4; P13647	Keratin, type II cytoskeletal 6B OS=Homo sapiens OX=9606 GN=KRT6B PE=1 SV=5; HCG2039812 OS=Homo sapiens (Human) OX=9606 GN=KRT6A hCG_2039812; Keratin, type II cytoskeletal 75 OS=Homo sapiens OX=9606 GN=KRT75 PE=1 SV=2; Keratin, type II cytoskeletal 6C OS=Homo sapiens OX=9606 GN=KRT6C PE=1 SV=3; Keratin, type II cytoskeletal 72 OS=Homo sapiens OX=9606 GN=KRT72 PE=1 SV=2; Keratin, type II cytoskele…	0	2	2	0.1116	0	1	1	1	513.732	1026.46	1026.46	1.22	0.00063	0	0	1168054	HCD	MS2	1.48041	50	40.6362	12720	12720	12719	0/0		2.33	1175	0.0007241	0.02234	0.26
1904247_Proteos_005.RAW	AF-M	Artificial Fingerprint	High	Sequest HT	Sequest HT (A2)	A	2	Unambiguous	SQYEQLAEQNR	SQYEQLAEQNR		1	1	P13645	P13645	Keratin, type I cytoskeletal 10 OS=Homo sapiens OX=9606 GN=KRT10 PE=1 SV=6	0	2	2	0.6059	0	1	1	1	683.323	1365.64	1365.64	-0.27	-0.00018	0	0	585600	HCD	MS2	0	50	40.8036	12769	12769	12768	0/0		2.69	1757	0	0.001452	0.671
1904247_Proteos_005.RAW	AF-M	Artificial Fingerprint	High	Sequest HT	Sequest HT (A2)	A	2	Unambiguous	TLLEGEESR	TLLEGEESR		1	1	P04264	P04264	Keratin, type II cytoskeletal 1 OS=Homo sapiens OX=9606 GN=KRT1 PE=1 SV=6	0	2	2	0.3018	0	1	1	1	517.262	1033.52	1033.52	-0.11	-6e-05	0	0	762335	HCD	MS2	14.5443	50	40.8575	12786	12786	12783	0/0		1.69	1094	0.0007241	0.02098	0.269
1904247_Proteos_005.RAW	AF-M	Artificial Fingerprint	High	Sequest HT	Sequest HT (A2)	A	2	Unambiguous	GFSSGSAVVSGGSR	GFSSGSAVVSGGSR		1	1	P35908	P35908	Keratin, type II cytoskeletal 2 epidermal OS=Homo sapiens OX=9606 GN=KRT2 PE=1 SV=2	0	2	2	0.6915	0	1	1	1	627.808	1254.61	1254.61	0.33	0.0002	0	0	708138	HCD	MS2	3.71068	50	40.8983	12798	12798	12797	0/0		2.82	1769	0.0007241	0.01063	0.372
1904247_Proteos_005.RAW	AF-M	Artificial Fingerprint	High	Sequest HT	Sequest HT (A2)	A	2	Unambiguous	VTMQNLNDR	VTMQNLnDR	N7(Deamidated)	3	7	P02533; P13645; P08779	P02533; Q7Z3Y7; P13645; Q7Z3Y9; Q7Z3Z0; Q7Z3Y8; P08779	Keratin, type I cytoskeletal 14 OS=Homo sapiens OX=9606 GN=KRT14 PE=1 SV=4; Keratin, type I cytoskeletal 28 OS=Homo sapiens OX=9606 GN=KRT28 PE=1 SV=2; Keratin, type I cytoskeletal 10 OS=Homo sapiens OX=9606 GN=KRT10 PE=1 SV=6; Keratin, type I cytoskeletal 26 OS=Homo sapiens OX=9606 GN=KRT26 PE=1 SV=2; Keratin, type I cytoskeletal 25 OS=Homo sapiens OX=9606 GN=KRT25 PE=1 SV=1; Keratin, type I cyt…	0	2	2	0.1135	0	1	1	1	546.259	1091.51	1091.51	-4.29	-0.00234	0	0	1.66185e+06	HCD	MS2	37.7947	26.997	40.9047	12800	12800	12799	0/0		1.85	1090	0.00493	0.08181	0.062
1904247_Proteos_005.RAW	AF-M	Artificial Fingerprint	High	Sequest HT	Sequest HT (A2)	A	2	Unambiguous	SQYEQLAEQNR	SQYEQLAEQNR		1	1	P13645	P13645	Keratin, type I cytoskeletal 10 OS=Homo sapiens OX=9606 GN=KRT10 PE=1 SV=6	0	3	3	0.4138	0	1	1	1	455.885	1365.64	1365.64	-0.17	-8e-05	0	0	981372	HCD	MS2	3.14083	50	40.922	12806	12806	12804	0/0		2.32	1750	0.0007241	0.02195	0.262
1904247_Proteos_005.RAW	AF-M	Artificial Fingerprint	High	Sequest HT	Sequest HT (A2)	A	2	Unambiguous	DYQELMNTK	DYQELmNTK	M6(Oxidation)	1	1	P04264	P04264	Keratin, type II cytoskeletal 1 OS=Homo sapiens OX=9606 GN=KRT1 PE=1 SV=6	0	2	2	0.4286	0	1	1	1	579.261	1157.51	1157.51	-0.2	-0.00011	0	0	245016	HCD	MS2	0	50	41.3088	12915	12915	12914	0/0		1.61	1342	0.002625	0.06229	0.104
1904247_Proteos_005.RAW	AF-M	Artificial Fingerprint	High	Sequest HT	Sequest HT (A2)	A	2	Unambiguous	YENEVALR	YENEVALR		1	1	P13645	P13645	Keratin, type I cytoskeletal 10 OS=Homo sapiens OX=9606 GN=KRT10 PE=1 SV=6	0	2	2	0.536	0	1	1	1	497.254	993.5	993.5	0.49	0.00024	0	0	1.7628e+06	HCD	MS2	3.20418	50	41.3158	12917	12917	12916	0/0		2.22	872	0.001797	0.04206	0.164
1904247_Proteos_005.RAW	AF-M	Artificial Fingerprint	High	Sequest HT	Sequest HT (A2)	A	2	Unambiguous	VDPEIQNVK	VDPEIQNVK		1	1	P35908	P35908	Keratin, type II cytoskeletal 2 epidermal OS=Homo sapiens OX=9606 GN=KRT2 PE=1 SV=2	0	2	2	0.1429	0	1	1	1	521.282	1041.56	1041.56	0.16	8e-05	0	0	684683	HCD	MS2	11.913	50	41.3171	12918	12918	12916	0/0		1.47	507	0.002625	0.04834	0.143
1904247_Proteos_005.RAW	AF-M	Artificial Fingerprint	High	Sequest HT	Sequest HT (A2)	A	2	Unambiguous	ISYAQYEK	ISYAQYEK		1	1	Q08188	Q08188	Protein-glutamine gamma-glutamyltransferase E OS=Homo sapiens OX=9606 GN=TGM3 PE=1 SV=4	0	2	2	0.4462	0	1	1	1	501.251	1001.49	1001.49	0.35	0.00018	0	0	578933	HCD	MS2	30.2219	50	41.3392	12924	12924	12922	0/0		1.86	827	0.001797	0.03541	0.19
1904247_Proteos_005.RAW	AF-M	Artificial Fingerprint	High	Sequest HT	Sequest HT (A2)	A	2	Unambiguous	KQQLEVELR	KQQLEVELR		1	1	P15924	P15924	Desmoplakin OS=Homo sapiens OX=9606 GN=DSP PE=1 SV=3	1	2	2	0.2438	0	1	1	1	571.83	1142.65	1142.65	0.29	0.00016	0	0	97935.2	HCD	MS2	13.1369	50	41.3625	12931	12931	12928	0/0		1.6	611	0.001797	0.03987	0.172
1904247_Proteos_005.RAW	AF-M	Artificial Fingerprint	High	Sequest HT	Sequest HT (A2)	A	2	Unambiguous	KQQLEVELR	KQQLEVELR		1	1	P15924	P15924	Desmoplakin OS=Homo sapiens OX=9606 GN=DSP PE=1 SV=3	1	3	3	0.3463	0	1	1	1	381.556	1142.65	1142.65	0.09	3e-05	0	0	247469	HCD	MS2	19.17	50	41.399	12941	12941	12940	0/0		2.05	611	0.004031	0.07491	0.075
1904247_Proteos_005.RAW	AF-M	Artificial Fingerprint	High	Sequest HT	Sequest HT (A2)	A	2	Unambiguous	SQYEQLAEQNR	SQYEQLAEQNR		1	1	P13645	P13645	Keratin, type I cytoskeletal 10 OS=Homo sapiens OX=9606 GN=KRT10 PE=1 SV=6	0	2	2	0.5983	0	1	1	1	683.323	1365.64	1365.64	-0.36	-0.00025	0	0	126589	HCD	MS2	8.58792	50	41.8059	13039	13039	13038	0/0		2.29	1757	0	0.002979	0.563
1904247_Proteos_005.RAW	AF-M	Artificial Fingerprint	High	Sequest HT	Sequest HT (A2)	A	2	Unambiguous	TLLEGEESR	TLLEGEESR		1	1	P04264	P04264	Keratin, type II cytoskeletal 1 OS=Homo sapiens OX=9606 GN=KRT1 PE=1 SV=6	0	2	2	0.1882	0	1	1	1	517.262	1033.52	1033.52	0.36	0.00019	0	0	362369	HCD	MS2	7.14833	50	41.8641	13054	13054	13053	0/0		1.7	1089	0.0007241	0.01038	0.375
1904247_Proteos_005.RAW	AF-M	Artificial Fingerprint	High	Sequest HT	Sequest HT (A2)	A	2	Unambiguous	LLQSGNSDVVR	LLQSGNSDVVR		1	1	Q13835	Q13835	Plakophilin-1 OS=Homo sapiens OX=9606 GN=PKP1 PE=1 SV=2	0	2	2	0.4955	0	1	1	1	594.323	1187.64	1187.64	-0.01	-1e-05	0	0	416073	HCD	MS2	19.9444	50	42.0502	13103	13103	13102	0/0		2.24	1046	0	0.002049	0.619
1904247_Proteos_005.RAW	AF-M	Artificial Fingerprint	High	Sequest HT	Sequest HT (A2)	A	2	Unambiguous	LTYEIEDEKR	LTYEIEDEKR		1	1	P15924	P15924	Desmoplakin OS=Homo sapiens OX=9606 GN=DSP PE=1 SV=3	1	3	3	0.0798	0	1	1	1	432.554	1295.65	1295.65	0	0	0	0	329509	HCD	MS2	25.9007	50	42.1419	13126	13126	13124	0/0		1.88	1871	0.0007241	0.01653	0.305
1904247_Proteos_005.RAW	AF-M	Artificial Fingerprint	High	Sequest HT	Sequest HT (A2)	A	2	Unambiguous	LTYEIEDEKR	LTYEIEDEKR		1	1	P15924	P15924	Desmoplakin OS=Homo sapiens OX=9606 GN=DSP PE=1 SV=3	1	2	2	0.4539	0	1	1	1	648.328	1295.65	1295.65	0.08	5e-05	0	0	65033.3	HCD	MS2	21.4423	50	42.1638	13132	13132	13129	0/0		1.52	1871	0.0007241	0.003617	0.534
1904247_Proteos_005.RAW	AF-M	Artificial Fingerprint	High	Sequest HT	Sequest HT (A2)	A	2	Unambiguous	ILQQIPDHPK	ILQQIPDHPK		1	1	Q08554	Q08554	Desmocollin-1 OS=Homo sapiens OX=9606 GN=DSC1 PE=1 SV=2	0	3	3	0.2011	0	1	1	1	396.896	1188.67	1188.67	0.07	3e-05	0	0	406548	HCD	MS2	29.6039	50	42.2811	13160	13160	13158	0/0		1.84	645	0.001797	0.03105	0.21
1904247_Proteos_005.RAW	AF-M	Artificial Fingerprint	High	Sequest HT	Sequest HT (A2)	A	2	Unambiguous	YENEVALR	YENEVALR		1	1	P13645	P13645	Keratin, type I cytoskeletal 10 OS=Homo sapiens OX=9606 GN=KRT10 PE=1 SV=6	0	2	2	0.0773	0	1	1	1	497.254	993.5	993.5	0.49	0.00024	0	0	377854	HCD	MS2	8.43675	50	42.3207	13169	13169	13168	0/0		1.94	872	0.0007241	0.02236	0.26
1904247_Proteos_005.RAW	AF-M	Artificial Fingerprint	High	Sequest HT	Sequest HT (A2)	A	2	Unambiguous	VTMQNLNDR	VTMQNLnDR	N7(Deamidated)	3	7	P02533; P13645; P08779	P02533; Q7Z3Y7; P13645; Q7Z3Y9; Q7Z3Z0; Q7Z3Y8; P08779	Keratin, type I cytoskeletal 14 OS=Homo sapiens OX=9606 GN=KRT14 PE=1 SV=4; Keratin, type I cytoskeletal 28 OS=Homo sapiens OX=9606 GN=KRT28 PE=1 SV=2; Keratin, type I cytoskeletal 10 OS=Homo sapiens OX=9606 GN=KRT10 PE=1 SV=6; Keratin, type I cytoskeletal 26 OS=Homo sapiens OX=9606 GN=KRT26 PE=1 SV=2; Keratin, type I cytoskeletal 25 OS=Homo sapiens OX=9606 GN=KRT25 PE=1 SV=1; Keratin, type I cyt…	0	2	2	0.0838	0	1	1	1	546.259	1091.51	1091.51	-3.95	-0.00216	0	0	356494	HCD	MS2	33.8577	50	42.376	13187	13187	13186	0/0		1.79	1090	0.001797	0.03545	0.19
1904247_Proteos_005.RAW	AF-M	Artificial Fingerprint	High	Sequest HT	Sequest HT (A2)	A	2	Unambiguous	MTLDDFR	mTLDDFR	M1(Oxidation)	1	1	P35527	P35527	Keratin, type I cytoskeletal 9 OS=Homo sapiens OX=9606 GN=KRT9 PE=1 SV=3	0	2	2	0.3391	0	1	1	1	457.208	913.408	913.408	-0.49	-0.00022	0	0	109804	HCD	MS2	44.3789	50	42.3945	13194	13194	13192	0/0		1.15	999	0.002625	0.04872	0.141
1904247_Proteos_005.RAW	AF-M	Artificial Fingerprint	High	Sequest HT	Sequest HT (A2)	A	2	Unambiguous	DGSNVIVTER	DGSNVIVTER		1	1	Q02413	Q02413	Desmoglein-1 OS=Homo sapiens OX=9606 GN=DSG1 PE=1 SV=2	0	2	2	0.4414	0	1	1	1	545.281	1089.55	1089.55	0.26	0.00014	0	0	1.02276e+06	HCD	MS2	7.28718	50	42.5183	13225	13225	13223	0/0		2.56	1180	0.0007241	0.01518	0.318
1904247_Proteos_005.RAW	AF-M	Artificial Fingerprint	High	Sequest HT	Sequest HT (A2)	A	2	Unambiguous	STSSFSCLSR	STSSFScLSR	C7(Carbamidomethyl)	1	1	P35908	P35908	Keratin, type II cytoskeletal 2 epidermal OS=Homo sapiens OX=9606 GN=KRT2 PE=1 SV=2	0	2	2	0.341	0	1	1	1	566.259	1131.51	1131.51	0.36	0.0002	0	0	131352	HCD	MS2	50.6865	50	42.5641	13235	13235	13234	0/0		1.73	1355	0.002625	0.06393	0.1
1904247_Proteos_005.RAW	AF-M	Artificial Fingerprint	High	Sequest HT	Sequest HT (A2)	A	2	Unambiguous	LAADDFR	LAADDFR		4	17	P02533; P13645; Q04695; P08779	Q14532; O76015; O76013; P02533; Q15323; Q7Z3Y7; P08727; Q2M2I5; Q14525; P13645; Q92764; P05783; P19012; P13646; Q04695; O76014; P08779	Keratin, type I cuticular Ha2 OS=Homo sapiens OX=9606 GN=KRT32 PE=2 SV=3; Keratin, type I cuticular Ha8 OS=Homo sapiens OX=9606 GN=KRT38 PE=1 SV=3; Keratin, type I cuticular Ha6 OS=Homo sapiens OX=9606 GN=KRT36 PE=2 SV=1; Keratin, type I cytoskeletal 14 OS=Homo sapiens OX=9606 GN=KRT14 PE=1 SV=4; Keratin, type I cuticular Ha1 OS=Homo sapiens OX=9606 GN=KRT31 PE=1 SV=3; Keratin, type I cytoskeleta…	0	2	2	0.462	0	1	1	1	404.203	807.399	807.4	-0.33	-0.00013	0	0	211308	HCD	MS2	17.1954	50	42.6047	13249	13249	13246	0/0		1.71	655	0.0007241	0.01674	0.303
1904247_Proteos_005.RAW	AF-M	Artificial Fingerprint	High	Sequest HT	Sequest HT (A2)	A	2	Unambiguous	SLEEEKYDMSGAR	SLEEEKYDMSGAR		1	1	P31944	P31944	Caspase-14 OS=Homo sapiens OX=9606 GN=CASP14 PE=1 SV=2	1	3	3	0.2584	0	1	1	1	505.565	1514.68	1514.68	1.29	0.00065	0	0	385297	HCD	MS2	65.8224	50	42.7596	13300	13300	13297	0/0		1.78	2612	0.002625	0.06573	0.096
1904247_Proteos_005.RAW	AF-M	Artificial Fingerprint	High	Sequest HT	Sequest HT (A2)	A	2	Unambiguous	SQYEQLAEQNR	SQYEQLAEQnR	N10(Deamidated)	1	1	P13645	P13645	Keratin, type I cytoskeletal 10 OS=Homo sapiens OX=9606 GN=KRT10 PE=1 SV=6	0	2	2	0.0977	0	1	1	1	683.817	1366.63	1366.62	2.14	0.00146	0	0	133817	HCD	MS2	27.8928	50	42.8186	13324	13324	13323	0/0		2.56	1922	0	0.0009767	0.73
1904247_Proteos_005.RAW	AF-M	Artificial Fingerprint	High	Sequest HT	Sequest HT (A2)	A	2	Unambiguous	NVALVSGDTENAK	NVALVSGDTENAK		1	1	Q16610	Q16610	Extracellular matrix protein 1 OS=Homo sapiens OX=9606 GN=ECM1 PE=1 SV=2	0	2	2	0.542	0	1	1	1	659.336	1317.66	1317.66	-0.01	0	0	0	326190	HCD	MS2	0	50	42.8428	13329	13329	13328	0/0		2.62	1663	0.0007241	0.021	0.269
1904247_Proteos_005.RAW	AF-M	Artificial Fingerprint	High	Sequest HT	Sequest HT (A2)	A	2	Unambiguous	TLLEGEESR	TLLEGEESR		1	1	P04264	P04264	Keratin, type II cytoskeletal 1 OS=Homo sapiens OX=9606 GN=KRT1 PE=1 SV=6	0	2	2	0.1553	0	1	1	1	517.262	1033.52	1033.52	0.72	0.00037	0	0	372619	HCD	MS2	27.5485	50	42.8709	13336	13336	13335	0/0		1.61	1089	0.007067	0.09268	0.042
1904247_Proteos_005.RAW	AF-M	Artificial Fingerprint	High	Sequest HT	Sequest HT (A2)	A	2	Unambiguous	EGDLIAAQAR	EGDLIAAQAR		1	1	P02545	P02545	Prelamin-A/C OS=Homo sapiens OX=9606 GN=LMNA PE=1 SV=1	0	2	2	0.3505	0	1	1	1	522.278	1043.55	1043.55	1.54	0.0008	0	0	527022	HCD	MS2	6.02988	50	43.4204	13510	13510	13509	0/0		2.14	776	0.001797	0.04145	0.166
1904247_Proteos_005.RAW	AF-M	Artificial Fingerprint	High	Sequest HT	Sequest HT (A2)	A	2	Unambiguous	NVQDAIADAEQR	NVQDAIADAEQR		1	1	P35908	P35908	Keratin, type II cytoskeletal 2 epidermal OS=Homo sapiens OX=9606 GN=KRT2 PE=1 SV=2	0	2	2	0.25	0	1	1	1	665.323	1329.64	1329.64	-0.46	-0.00031	0	0	83103.3	HCD	MS2	69.6438	50	43.428	13513	13513	13512	0/0		1.36	1774	0.001797	0.0391	0.175
1904247_Proteos_005.RAW	AF-M	Artificial Fingerprint	High	Sequest HT	Sequest HT (A2)	A	2	Unambiguous	STSSFSCLSR	STSSFScLSR	C7(Carbamidomethyl)	1	1	P35908	P35908	Keratin, type II cytoskeletal 2 epidermal OS=Homo sapiens OX=9606 GN=KRT2 PE=1 SV=2	0	2	2	0.3671	0	1	1	1	566.26	1131.51	1131.51	1.87	0.00106	0	0	291596	HCD	MS2	0	50	43.5664	13561	13561	13560	0/0		2.07	1314	0.001797	0.03441	0.194
1904247_Proteos_005.RAW	AF-M	Artificial Fingerprint	High	Sequest HT	Sequest HT (A2)	A	2	Unambiguous	LAADDFR	LAADDFR		4	17	P02533; P13645; Q04695; P08779	Q14532; O76015; O76013; P02533; Q15323; Q7Z3Y7; P08727; Q2M2I5; Q14525; P13645; Q92764; P05783; P19012; P13646; Q04695; O76014; P08779	Keratin, type I cuticular Ha2 OS=Homo sapiens OX=9606 GN=KRT32 PE=2 SV=3; Keratin, type I cuticular Ha8 OS=Homo sapiens OX=9606 GN=KRT38 PE=1 SV=3; Keratin, type I cuticular Ha6 OS=Homo sapiens OX=9606 GN=KRT36 PE=2 SV=1; Keratin, type I cytoskeletal 14 OS=Homo sapiens OX=9606 GN=KRT14 PE=1 SV=4; Keratin, type I cuticular Ha1 OS=Homo sapiens OX=9606 GN=KRT31 PE=1 SV=3; Keratin, type I cytoskeleta…	0	2	2	0.4221	0	1	1	1	404.203	807.4	807.4	0.05	2e-05	0	0	13389888	HCD	MS2	0.228553	6.078	43.6116	13574	13574	13573	0/0		1.54	655	0.001797	0.04421	0.156
1904247_Proteos_005.RAW	AF-M	Artificial Fingerprint	High	Sequest HT	Sequest HT (A2)	A	2	Unambiguous	KEEELQAALAR	KEEELQAALAR		1	3	Q7Z406	P35749; A0A024R1N1; Q7Z406	Myosin-11 OS=Homo sapiens OX=9606 GN=MYH11 PE=1 SV=3; Myosin OS=Homo sapiens (Human) OX=9606 GN=MYH9 hCG_41454; Myosin-14 OS=Homo sapiens OX=9606 GN=MYH14 PE=1 SV=2	1	3	3	0.0741	0	1	1	1	419.897	1257.68	1257.68	-2.47	-0.00103	0	0	99544.9	HCD	MS2	45.1362	50	43.643	13582	13582	13581	0/0		1.08	986	0.001797	0.04352	0.159
1904247_Proteos_005.RAW	AF-M	Artificial Fingerprint	High	Sequest HT	Sequest HT (A2)	A	2	Unambiguous	IKFEMEQNLR	IKFEmEQNLR	M5(Oxidation)	1	1	P35527	P35527	Keratin, type I cytoskeletal 9 OS=Homo sapiens OX=9606 GN=KRT9 PE=1 SV=3	1	3	3	0.3214	0	1	1	1	441.896	1323.67	1323.67	0.05	2e-05	0	0	3283563	HCD	MS2	0.235322	19.321	43.7207	13604	13604	13603	0/0		2.24	1463	0.00363	0.07063	0.084
1904247_Proteos_005.RAW	AF-M	Artificial Fingerprint	High	Sequest HT	Sequest HT (A2)	A	2	Unambiguous	ASLENSLEETK	ASLEnSLEETK	N5(Deamidated)	2	2	P02533; P08779	P02533; P08779	Keratin, type I cytoskeletal 14 OS=Homo sapiens OX=9606 GN=KRT14 PE=1 SV=4; Keratin, type I cytoskeletal 16 OS=Homo sapiens OX=9606 GN=KRT16 PE=1 SV=4	0	2	2	0.385	0	1	1	1	611.296	1221.58	1221.58	0.21	0.00013	0	0	292313	HCD	MS2	5.50406	50	43.9754	13697	13697	13696	0/0		1.87	1443	0.0007241	0.01214	0.352
1904247_Proteos_005.RAW	AF-M	Artificial Fingerprint	High	Sequest HT	Sequest HT (A2)	A	2	Unambiguous	SGFSSVSVSR	SGFSSVSVSR		1	1	A0A0S2Z428	A0A0S2Z428	HCG2039812 OS=Homo sapiens (Human) OX=9606 GN=KRT6A hCG_2039812	0	2	2	0.4579	0	1	1	1	506.757	1012.51	1012.51	0.71	0.00036	0	0	738458	HCD	MS2	14.8561	50	44.0091	13709	13709	13706	0/0		2.14	901	0.0007241	0.01179	0.356
1904247_Proteos_005.RAW	AF-M	Artificial Fingerprint	High	Sequest HT	Sequest HT (A2)	A	2	Unambiguous	IKFEMEQNLR	IKFEmEQNLR	M5(Oxidation)	1	1	P35527	P35527	Keratin, type I cytoskeletal 9 OS=Homo sapiens OX=9606 GN=KRT9 PE=1 SV=3	1	2	2	0.2667	0	1	1	1	662.34	1323.67	1323.67	-0.01	-1e-05	0	0	1.2244e+06	HCD	MS2	2.09108	50	44.1782	13769	13769	13768	0/0		2.25	1466	0.001797	0.03597	0.188
1904247_Proteos_005.RAW	AF-M	Artificial Fingerprint	High	Sequest HT	Sequest HT (A2)	A	2	Unambiguous	AGEVQEPELR	AGEVQEPELR		1	1	P25311	P25311	Zinc-alpha-2-glycoprotein OS=Homo sapiens OX=9606 GN=AZGP1 PE=1 SV=2	0	2	2	0.3353	0	1	1	1	564.289	1127.57	1127.57	1.53	0.00086	0	0	88717.7	HCD	MS2	24.2998	50	44.1808	13771	13771	13768	0/0		1.73	944	0.0007241	0.02606	0.236
1904247_Proteos_005.RAW	AF-M	Artificial Fingerprint	High	Sequest HT	Sequest HT (A2)	A	2	Unambiguous	TLLEGEESR	TLLEGEESR		1	1	P04264	P04264	Keratin, type II cytoskeletal 1 OS=Homo sapiens OX=9606 GN=KRT1 PE=1 SV=6	0	2	2	0.2063	0	1	1	1	517.262	1033.52	1033.52	0.48	0.00025	0	0	273073	HCD	MS2	14.93	50	44.195	13774	13774	13773	0/0		1.26	1089	0.008659	0.1052	0.022
1904247_Proteos_005.RAW	AF-M	Artificial Fingerprint	High	Sequest HT	Sequest HT (A2)	A	2	Unambiguous	LAADDFR	LAADDFR		4	17	P02533; P13645; Q04695; P08779	Q14532; O76015; O76013; P02533; Q15323; Q7Z3Y7; P08727; Q2M2I5; Q14525; P13645; Q92764; P05783; P19012; P13646; Q04695; O76014; P08779	Keratin, type I cuticular Ha2 OS=Homo sapiens OX=9606 GN=KRT32 PE=2 SV=3; Keratin, type I cuticular Ha8 OS=Homo sapiens OX=9606 GN=KRT38 PE=1 SV=3; Keratin, type I cuticular Ha6 OS=Homo sapiens OX=9606 GN=KRT36 PE=2 SV=1; Keratin, type I cytoskeletal 14 OS=Homo sapiens OX=9606 GN=KRT14 PE=1 SV=4; Keratin, type I cuticular Ha1 OS=Homo sapiens OX=9606 GN=KRT31 PE=1 SV=3; Keratin, type I cytoskeleta…	0	2	2	0.3625	0	1	1	1	404.204	807.4	807.4	0.5	0.0002	0	0	2.42415e+06	HCD	MS2	0.30109	34.349	44.6194	13912	13912	13911	0/0		1.6	655	0.001797	0.04103	0.168
1904247_Proteos_005.RAW	AF-M	Artificial Fingerprint	High	Sequest HT	Sequest HT (A2)	A	2	Unambiguous	GGSGGSHGGGSGFGGESGGSYGGGEEASGSGGGYGGGSGK	GGSGGSHGGGSGFGGESGGSYGGGEEASGSGGGYGGGSGK		1	1	P35527	P35527	Keratin, type I cytoskeletal 9 OS=Homo sapiens OX=9606 GN=KRT9 PE=1 SV=3	0	3	3	0.6955	0	1	1	1	1075.1	3223.28	3223.28	0.5	0.00053	0	0	1.58287e+06	HCD	MS2	0	50	44.7436	13945	13945	13944	0/0		7.39	4071	0	5.826e-07	1.846
1904247_Proteos_005.RAW	AF-M	Artificial Fingerprint	High	Sequest HT	Sequest HT (A2)	A	2	Unambiguous	TNAENEFVTIKK	TNAEnEFVTIKK	N5(Deamidated)	1	1	P04264	P04264	Keratin, type II cytoskeletal 1 OS=Homo sapiens OX=9606 GN=KRT1 PE=1 SV=6	1	3	3	0.1128	0	1	1	1	465.577	1394.72	1394.72	-0.28	-0.00013	0	0	1.71129e+06	HCD	MS2	5.32503	34.948	44.8432	13976	13976	13975	0/0		2.66	1569	0.0007241	0.008712	0.401
1904247_Proteos_005.RAW	AF-M	Artificial Fingerprint	High	Sequest HT	Sequest HT (A2)	A	2	Unambiguous	EQYNMLGGK	EQYNMLGGK		1	1	Q02413	Q02413	Desmoglein-1 OS=Homo sapiens OX=9606 GN=DSG1 PE=1 SV=2	0	2	2	0.2848	0	1	1	1	520.248	1039.49	1039.49	0.48	0.00025	0	0	297436	HCD	MS2	26.2724	50	44.9828	14016	14016	14013	0/0		1.51	1196	0.001797	0.03307	0.2
1904247_Proteos_005.RAW	AF-M	Artificial Fingerprint	High	Sequest HT	Sequest HT (A2)	A	2	Unambiguous	TNAENEFVTIKK	TNAEnEFVTIKK	N5(Deamidated)	1	1	P04264	P04264	Keratin, type II cytoskeletal 1 OS=Homo sapiens OX=9606 GN=KRT1 PE=1 SV=6	1	2	2	0.2857	0	1	1	1	697.862	1394.72	1394.72	0.73	0.00051	0	0	87296.1	HCD	MS2	18.1161	50	45.0978	14048	14048	14047	0/0		1.75	1524	0.009708	0.1067	0.02
1904247_Proteos_005.RAW	AF-M	Artificial Fingerprint	High	Sequest HT	Sequest HT (A2)	A	2	Unambiguous	QGFNFR	QGFNFR		1	1	Q8IW75	Q8IW75	Serpin A12 OS=Homo sapiens OX=9606 GN=SERPINA12 PE=1 SV=1	0	2	2	0.2323	0	1	1	1	384.693	768.38	768.379	1.14	0.00044	0	0	98565	HCD	MS2	51.2375	50	45.1452	14060	14060	14059	0/0		0.99	450	0.002625	0.06408	0.099
1904247_Proteos_005.RAW	AF-M	Artificial Fingerprint	High	Sequest HT	Sequest HT (A2)	A	2	Unambiguous	KLAFYNPGR	KLAFYNPGR		1	1	Q8IW75	Q8IW75	Serpin A12 OS=Homo sapiens OX=9606 GN=SERPINA12 PE=1 SV=1	1	2	2	0.391	0	1	1	1	533.296	1065.58	1065.58	-0.08	-4e-05	0	0	53599.8	HCD	MS2	44.8696	50	45.1579	14063	14063	14062	0/0		1.33	596	0.003126	0.06927	0.087
1904247_Proteos_005.RAW	AF-M	Artificial Fingerprint	High	Sequest HT	Sequest HT (A2)	A	2	Unambiguous	RLDQCPESPLQR	RLDQcPESPLQR	C5(Carbamidomethyl)	1	1	Q5T749	Q5T749	Keratinocyte proline-rich protein OS=Homo sapiens OX=9606 GN=KPRP PE=1 SV=1	1	3	3	0.4118	0	1	1	1	500.253	1498.74	1498.74	0.58	0.00029	0	0	371279	HCD	MS2	18.3673	50	45.3579	14121	14121	14120	0/0		2.55	2112	0.0007241	0.01912	0.283
1904247_Proteos_005.RAW	AF-M	Artificial Fingerprint	High	Sequest HT	Sequest HT (A2)	A	2	Unambiguous	TNAENEFVTIKK	TNAENEFVTIKK		1	1	P04264	P04264	Keratin, type II cytoskeletal 1 OS=Homo sapiens OX=9606 GN=KRT1 PE=1 SV=6	1	3	3	0.3109	0	1	1	1	465.249	1393.73	1393.73	0.58	0.00027	0	0	551322	HCD	MS2	63.2685	50	45.4148	14137	14137	14135	0/0		1.93	1292	0.001797	0.03266	0.202
1904247_Proteos_005.RAW	AF-M	Artificial Fingerprint	High	Sequest HT	Sequest HT (A2)	A	2	Unambiguous	LAADDFR	LAADDFR		4	17	P02533; P13645; Q04695; P08779	Q14532; O76015; O76013; P02533; Q15323; Q7Z3Y7; P08727; Q2M2I5; Q14525; P13645; Q92764; P05783; P19012; P13646; Q04695; O76014; P08779	Keratin, type I cuticular Ha2 OS=Homo sapiens OX=9606 GN=KRT32 PE=2 SV=3; Keratin, type I cuticular Ha8 OS=Homo sapiens OX=9606 GN=KRT38 PE=1 SV=3; Keratin, type I cuticular Ha6 OS=Homo sapiens OX=9606 GN=KRT36 PE=2 SV=1; Keratin, type I cytoskeletal 14 OS=Homo sapiens OX=9606 GN=KRT14 PE=1 SV=4; Keratin, type I cuticular Ha1 OS=Homo sapiens OX=9606 GN=KRT31 PE=1 SV=3; Keratin, type I cytoskeleta…	0	2	2	0.3989	0	1	1	1	404.203	807.4	807.4	-0.03	-1e-05	0	0	1.39774e+06	HCD	MS2	2.57614	50	45.6271	14195	14195	14194	0/0		1.88	655	0.001797	0.03836	0.178
1904247_Proteos_005.RAW	AF-M	Artificial Fingerprint	High	Sequest HT	Sequest HT (A2)	A	2	Unambiguous	YENEVALR	YEnEVALR	N3(Deamidated)	1	1	P13645	P13645	Keratin, type I cytoskeletal 10 OS=Homo sapiens OX=9606 GN=KRT10 PE=1 SV=6	0	2	2	0.4432	0	1	1	1	497.746	994.484	994.484	-0.19	-9e-05	0	0	1.69415e+06	HCD	MS2	3.50994	50	45.665	14205	14205	14204	0/0		1.85	840	0.001797	0.04441	0.156
1904247_Proteos_005.RAW	AF-M	Artificial Fingerprint	High	Sequest HT	Sequest HT (A2)	A	2	Selected	VDPEIQNVK	VDPEIQnVK	N7(Deamidated)	1	1	P35908	P35908	Keratin, type II cytoskeletal 2 epidermal OS=Homo sapiens OX=9606 GN=KRT2 PE=1 SV=2	0	2	2	0.0405	0	1	1	1	521.774	1042.54	1042.54	-0.08	-4e-05	0	0	516817	HCD	MS2	20.3955	50	45.6748	14208	14208	14207	0/0		1.73	659	0.002377	0.04803	0.144
1904247_Proteos_005.RAW	AF-M	Artificial Fingerprint	High	Sequest HT	Sequest HT (A2)	A	2	Unambiguous	IKFEMEQNLR	IKFEmEQNLR	M5(Oxidation)	1	1	P35527	P35527	Keratin, type I cytoskeletal 9 OS=Homo sapiens OX=9606 GN=KRT9 PE=1 SV=3	1	3	3	0.2	0	1	1	1	441.896	1323.67	1323.67	0.46	0.0002	0	0	459387	HCD	MS2	6.02786	50	45.7257	14230	14230	14229	0/0		1.6	1467	0.005861	0.08624	0.053
1904247_Proteos_005.RAW	AF-M	Artificial Fingerprint	High	Sequest HT	Sequest HT (A2)	A	2	Unambiguous	KLADISLGK	KLADISLGK		1	1	Q02413	Q02413	Desmoglein-1 OS=Homo sapiens OX=9606 GN=DSG1 PE=1 SV=2	1	2	2	0.5446	0	1	1	1	472.792	944.577	944.578	-0.59	-0.00028	0	0	1.85175e+06	HCD	MS2	2.86639	50	45.739	14236	14236	14235	0/0		3.14	306	0.0007241	0.009158	0.394
1904247_Proteos_005.RAW	AF-M	Artificial Fingerprint	High	Sequest HT	Sequest HT (A2)	A	2	Unambiguous	GGSGGSHGGGSGFGGESGGSYGGGEEASGSGGGYGGGSGK	GGSGGSHGGGSGFGGESGGSYGGGEEASGSGGGYGGGSGK		1	1	P35527	P35527	Keratin, type I cytoskeletal 9 OS=Homo sapiens OX=9606 GN=KRT9 PE=1 SV=3	0	3	3	0.6774	0	1	1	1	1075.1	3223.28	3223.28	-0.64	-0.00069	0	0	1.22814e+06	HCD	MS2	0	50	45.7493	14241	14241	14240	0/0		7.47	3847	0	3.537e-07	1.921
1904247_Proteos_005.RAW	AF-M	Artificial Fingerprint	High	Sequest HT	Sequest HT (A2)	A	2	Unambiguous	AQSQLVAGIK	AQSQLVAGIK		1	1	Q15828	Q15828	Cystatin-M OS=Homo sapiens OX=9606 GN=CST6 PE=1 SV=1	0	2	2	0.3791	0	1	1	1	507.801	1014.6	1014.59	1.21	0.00061	0	0	303151	HCD	MS2	10.8616	50	45.7701	14249	14249	14248	0/0		1.82	570	0.002625	0.05666	0.118
1904247_Proteos_005.RAW	AF-M	Artificial Fingerprint	High	Sequest HT	Sequest HT (A2)	A	2	Unambiguous	VTMQNLNDR	VTMQnLNDR	N5(Deamidated)	3	7	P02533; P13645; P08779	P02533; Q7Z3Y7; P13645; Q7Z3Y9; Q7Z3Z0; Q7Z3Y8; P08779	Keratin, type I cytoskeletal 14 OS=Homo sapiens OX=9606 GN=KRT14 PE=1 SV=4; Keratin, type I cytoskeletal 28 OS=Homo sapiens OX=9606 GN=KRT28 PE=1 SV=2; Keratin, type I cytoskeletal 10 OS=Homo sapiens OX=9606 GN=KRT10 PE=1 SV=6; Keratin, type I cytoskeletal 26 OS=Homo sapiens OX=9606 GN=KRT26 PE=1 SV=2; Keratin, type I cytoskeletal 25 OS=Homo sapiens OX=9606 GN=KRT25 PE=1 SV=1; Keratin, type I cyt…	0	2	2	0.0769	0	1	1	1	546.261	1091.51	1091.51	-0.71	-0.00039	0	0	114403	HCD	MS2	46.8643	50	45.8126	14262	14262	14261	0/0		1.69	1161	0.00493	0.08294	0.059
1904247_Proteos_005.RAW	AF-M	Artificial Fingerprint	High	Sequest HT	Sequest HT (A2)	A	2	Unambiguous	TNAENEFVTIKK	TNAENEFVTIKK		1	1	P04264	P04264	Keratin, type II cytoskeletal 1 OS=Homo sapiens OX=9606 GN=KRT1 PE=1 SV=6	1	2	2	0.5833	0	1	1	1	697.37	1393.73	1393.73	-0.31	-0.00022	0	0	4.85393e+06	HCD	MS2	1.02961	24.738	46.1075	14355	14355	14354	0/0		3.48	1321	0.0007241	0.004044	0.517
1904247_Proteos_005.RAW	AF-M	Artificial Fingerprint	High	Sequest HT	Sequest HT (A2)	A	2	Unambiguous	GGSGGSYGGGSGSGGGSGGGYGGGSGGGHSGGSGGGHSGGSGGNYGGGSGSGGGSGGGYGGGSGSR	GGSGGSYGGGSGSGGGSGGGYGGGSGGGHSGGSGGGHSGGSGGNYGGGSGSGGGSGGGYGGGSGSR		1	1	P35527	P35527	Keratin, type I cytoskeletal 9 OS=Homo sapiens OX=9606 GN=KRT9 PE=1 SV=3	0	4	4	0.3535	0	1	1	1	1243.99	4972.93	4972.94	-0.92	-0.00115	0	0	54191.8	HCD	MS2	0	50	46.1416	14366	14366	14365	0/0		1.98	1666	0.008659	0.1052	0.022
1904247_Proteos_005.RAW	AF-M	Artificial Fingerprint	High	Sequest HT	Sequest HT (A2)	A	2	Unambiguous	NMQDMVEDYR	NmQDmVEDYR	M2(Oxidation); M5(Oxidation)	1	1	P04264	P04264	Keratin, type II cytoskeletal 1 OS=Homo sapiens OX=9606 GN=KRT1 PE=1 SV=6	0	2	2	0.1899	0	1	1	1	666.763	1332.52	1332.52	-0.75	-0.0005	0	0	147916	HCD	MS2	0	50	46.2403	14396	14396	14395	0/0		1.58	993	0.001797	0.04014	0.171
1904247_Proteos_005.RAW	AF-M	Artificial Fingerprint	High	Sequest HT	Sequest HT (A2)	A	2	Unambiguous	EVATNSELVQSGK	EVATnSELVQSGK	N5(Deamidated)	2	2	P02533; Q04695	P02533; Q04695	Keratin, type I cytoskeletal 14 OS=Homo sapiens OX=9606 GN=KRT14 PE=1 SV=4; Keratin, type I cytoskeletal 17 OS=Homo sapiens OX=9606 GN=KRT17 PE=1 SV=2	0	2	2	0.1582	0	1	1	1	681.841	1362.67	1362.67	-0.26	-0.00018	0	0	462332	HCD	MS2	3.41375	50	46.3633	14431	14431	14430	0/0		2.97	1820	0	0.0003422	0.888
1904247_Proteos_005.RAW	AF-M	Artificial Fingerprint	High	Sequest HT	Sequest HT (A2)	A	2	Unambiguous	RLDQCPESPLQR	RLDQcPESPLQR	C5(Carbamidomethyl)	1	1	Q5T749	Q5T749	Keratinocyte proline-rich protein OS=Homo sapiens OX=9606 GN=KPRP PE=1 SV=1	1	3	3	0.3821	0	1	1	1	500.252	1498.74	1498.74	-0.09	-4e-05	0	0	320123	HCD	MS2	18.8226	50	46.3647	14432	14432	14430	0/0		2.12	2252	0.0007241	0.006051	0.456
1904247_Proteos_005.RAW	AF-M	Artificial Fingerprint	High	Sequest HT	Sequest HT (A2)	A	2	Unambiguous	VGVNGFGR	VGVnGFGR	N4(Deamidated)	1	1	P04406	P04406	Glyceraldehyde-3-phosphate dehydrogenase OS=Homo sapiens OX=9606 GN=GAPDH PE=1 SV=3	0	2	2	0.3483	0	1	1	1	403.711	806.415	806.416	-0.09	-4e-05	0	0	969708	HCD	MS2	43.0532	50	46.3906	14442	14442	14441	0/0		1.78	678	0.001797	0.03029	0.214
1904247_Proteos_005.RAW	AF-M	Artificial Fingerprint	High	Sequest HT	Sequest HT (A2)	A	2	Unambiguous	LENEIQTYR	LENEIQTYR		1	1	P13645	P13645	Keratin, type I cytoskeletal 10 OS=Homo sapiens OX=9606 GN=KRT10 PE=1 SV=6	0	2	2	0.3107	0	1	1	1	583.297	1165.59	1165.58	1.35	0.00079	0	0	47547	HCD	MS2	57.93	50	46.425	14455	14455	14451	0/0		1.03	1189	0.009708	0.1156	0.007
1904247_Proteos_005.RAW	AF-M	Artificial Fingerprint	High	Sequest HT	Sequest HT (A2)	A	2	Unambiguous	YENEVALR	YEnEVALR	N3(Deamidated)	1	1	P13645	P13645	Keratin, type I cytoskeletal 10 OS=Homo sapiens OX=9606 GN=KRT10 PE=1 SV=6	0	2	2	0.3944	0	1	1	1	497.745	994.484	994.484	-0.31	-0.00016	0	0	270692	HCD	MS2	9.09482	50	46.6719	14541	14541	14540	0/0		1.42	837	0.004031	0.07609	0.073
1904247_Proteos_005.RAW	AF-M	Artificial Fingerprint	High	Sequest HT	Sequest HT (A2)	A	2	Unambiguous	GGSGGSHGGGSGFGGESGGSYGGGEEASGSGGGYGGGSGK	GGSGGSHGGGSGFGGESGGSYGGGEEASGSGGGYGGGSGK		1	1	P35527	P35527	Keratin, type I cytoskeletal 9 OS=Homo sapiens OX=9606 GN=KRT9 PE=1 SV=3	0	3	3	0.6715	0	1	1	1	1075.1	3223.29	3223.28	1.29	0.00139	0	0	722450	HCD	MS2	0	50	46.755	14570	14570	14569	0/0		6.21	4199	0	2.243e-06	1.643
1904247_Proteos_005.RAW	AF-M	Artificial Fingerprint	High	Sequest HT	Sequest HT (A2)	A	2	Unambiguous	GSYGSGGSSYGSGGGSYGSGGGGGGHGSYGSGSSSGGYR	GSYGSGGSSYGSGGGSYGSGGGGGGHGSYGSGSSSGGYR		1	1	P04264	P04264	Keratin, type II cytoskeletal 1 OS=Homo sapiens OX=9606 GN=KRT1 PE=1 SV=6	0	4	4	0.2735	0	1	1	1	828.831	3312.3	3312.31	-1.21	-0.00101	0	0	114524	HCD	MS2	73.0356	50	46.8104	14590	14590	14588	0/0		2.23	3631	0.008659	0.1018	0.027
1904247_Proteos_005.RAW	AF-M	Artificial Fingerprint	High	Sequest HT	Sequest HT (A2)	A	2	Unambiguous	TNAENEFVTIKK	TNAENEFVTIKK		1	1	P04264	P04264	Keratin, type II cytoskeletal 1 OS=Homo sapiens OX=9606 GN=KRT1 PE=1 SV=6	1	2	2	0.4647	0	1	1	1	697.37	1393.73	1393.73	0.21	0.00015	0	0	342548	HCD	MS2	0	50	47.1106	14695	14695	14694	0/0		2.41	1291	0.0007241	0.008525	0.405
1904247_Proteos_005.RAW	AF-M	Artificial Fingerprint	High	Sequest HT	Sequest HT (A2)	A	2	Unambiguous	NMQDMVEDYR	NmQDmVEDYR	M2(Oxidation); M5(Oxidation)	1	1	P04264	P04264	Keratin, type II cytoskeletal 1 OS=Homo sapiens OX=9606 GN=KRT1 PE=1 SV=6	0	2	2	0.2798	0	1	1	1	666.764	1332.52	1332.52	1.08	0.00072	0	0	215814	HCD	MS2	16.7208	50	47.2463	14744	14744	14743	0/0		1.93	997	0.0007241	0.009588	0.387
1904247_Proteos_005.RAW	AF-M	Artificial Fingerprint	High	Sequest HT	Sequest HT (A2)	A	2	Unambiguous	LAADDFR	LAADDFR		4	17	P02533; P13645; Q04695; P08779	Q14532; O76015; O76013; P02533; Q15323; Q7Z3Y7; P08727; Q2M2I5; Q14525; P13645; Q92764; P05783; P19012; P13646; Q04695; O76014; P08779	Keratin, type I cuticular Ha2 OS=Homo sapiens OX=9606 GN=KRT32 PE=2 SV=3; Keratin, type I cuticular Ha8 OS=Homo sapiens OX=9606 GN=KRT38 PE=1 SV=3; Keratin, type I cuticular Ha6 OS=Homo sapiens OX=9606 GN=KRT36 PE=2 SV=1; Keratin, type I cytoskeletal 14 OS=Homo sapiens OX=9606 GN=KRT14 PE=1 SV=4; Keratin, type I cuticular Ha1 OS=Homo sapiens OX=9606 GN=KRT31 PE=1 SV=3; Keratin, type I cytoskeleta…	0	2	2	0.3149	0	1	1	1	404.203	807.4	807.4	-0.03	-1e-05	0	0	556846	HCD	MS2	8.32415	50	47.3993	14797	14797	14796	0/0		1.81	655	0.001406	0.02897	0.22
1904247_Proteos_005.RAW	AF-M	Artificial Fingerprint	High	Sequest HT	Sequest HT (A2)	A	2	Unambiguous	TNAENEFVTIKK	TNAENEFVTIKK		1	1	P04264	P04264	Keratin, type II cytoskeletal 1 OS=Homo sapiens OX=9606 GN=KRT1 PE=1 SV=6	1	3	3	0.3495	0	1	1	1	465.249	1393.73	1393.73	0.18	9e-05	0	0	3.48791e+06	HCD	MS2	2.80789	20.151	47.4232	14809	14809	14808	0/0		2.89	1291	0.0007241	0.009971	0.381
1904247_Proteos_005.RAW	AF-M	Artificial Fingerprint	High	Sequest HT	Sequest HT (A2)	A	2	Unambiguous	LENEIQTYR	LENEIQTYR		1	1	P13645	P13645	Keratin, type I cytoskeletal 10 OS=Homo sapiens OX=9606 GN=KRT10 PE=1 SV=6	0	2	2	0.413	0	1	1	1	583.296	1165.59	1165.58	0.41	0.00024	0	0	5521746	HCD	MS2	0.137361	14.524	47.4313	14812	14812	14811	0/0		3.22	1215	0.0007241	0.01285	0.343
1904247_Proteos_005.RAW	AF-M	Artificial Fingerprint	High	Sequest HT	Sequest HT (A2)	A	2	Unambiguous	GSYGSGGSSYGSGGGSYGSGGGGGGHGSYGSGSSSGGYR	GSYGSGGSSYGSGGGSYGSGGGGGGHGSYGSGSSSGGYR		1	1	P04264	P04264	Keratin, type II cytoskeletal 1 OS=Homo sapiens OX=9606 GN=KRT1 PE=1 SV=6	0	3	3	0.5974	0	1	1	1	1104.77	3312.31	3312.31	0.61	0.00068	0	0	1.8883e+06	HCD	MS2	0.335635	50	47.5956	14868	14868	14867	0/0		7.8	3905	0	1.163e-07	2.088
1904247_Proteos_005.RAW	AF-M	Artificial Fingerprint	High	Sequest HT	Sequest HT (A2)	A	2	Unambiguous	YENEVALR	YEnEVALR	N3(Deamidated)	1	1	P13645	P13645	Keratin, type I cytoskeletal 10 OS=Homo sapiens OX=9606 GN=KRT10 PE=1 SV=6	0	2	2	0.4277	0	1	1	1	497.746	994.484	994.484	-0.01	0	0	0	479761	HCD	MS2	10.7242	50	47.6744	14890	14890	14889	0/0		1.66	840	0.0007241	0.02355	0.252
1904247_Proteos_005.RAW	AF-M	Artificial Fingerprint	High	Sequest HT	Sequest HT (A2)	A	2	Unambiguous	GGSGGSHGGGSGFGGESGGSYGGGEEASGSGGGYGGGSGK	GGSGGSHGGGSGFGGESGGSYGGGEEASGSGGGYGGGSGK		1	1	P35527	P35527	Keratin, type I cytoskeletal 9 OS=Homo sapiens OX=9606 GN=KRT9 PE=1 SV=3	0	3	3	0.6154	0	1	1	1	1075.1	3223.28	3223.28	0.38	0.00041	0	0	347993	HCD	MS2	1.05568	50	47.7612	14920	14920	14919	0/0		5.07	4047	0	3.432e-06	1.579
1904247_Proteos_005.RAW	AF-M	Artificial Fingerprint	High	Sequest HT	Sequest HT (A2)	A	2	Unambiguous	TAAENDFVTLKK	TAAENDFVTLKK		1	1	P35908	P35908	Keratin, type II cytoskeletal 2 epidermal OS=Homo sapiens OX=9606 GN=KRT2 PE=1 SV=2	1	2	2	0.4518	0	1	1	1	668.859	1336.71	1336.71	-0.43	-0.00029	0	0	136467	HCD	MS2	12.1739	50	47.8951	14960	14960	14958	0/0		1.66	1160	0.009708	0.1159	0.007
1904247_Proteos_005.RAW	AF-M	Artificial Fingerprint	High	Sequest HT	Sequest HT (A2)	A	2	Unambiguous	RTNAENEFVTIK	RTNAENEFVTIK		1	1	P04264	P04264	Keratin, type II cytoskeletal 1 OS=Homo sapiens OX=9606 GN=KRT1 PE=1 SV=6	1	3	3	0.4247	0	1	1	1	474.584	1421.74	1421.74	0	0	0	0	282155	HCD	MS2	17.6037	50	47.921	14969	14969	14968	0/0		2.19	1436	0.002625	0.0575	0.116
1904247_Proteos_005.RAW	AF-M	Artificial Fingerprint	High	Sequest HT	Sequest HT (A2)	A	2	Unambiguous	TAAENDFVTLKK	TAAENDFVTLKK		1	1	P35908	P35908	Keratin, type II cytoskeletal 2 epidermal OS=Homo sapiens OX=9606 GN=KRT2 PE=1 SV=2	1	3	3	0.3504	0	1	1	1	446.242	1336.71	1336.71	0.02	1e-05	0	0	1.96977e+06	HCD	MS2	14.5106	29.79	47.9336	14972	14972	14971	0/0		2.54	1177	0.0007241	0.02685	0.232
1904247_Proteos_005.RAW	AF-M	Artificial Fingerprint	High	Sequest HT	Sequest HT (A2)	A	2	Unambiguous	TLLEGEESR	TLLEGEESR		1	1	P04264	P04264	Keratin, type II cytoskeletal 1 OS=Homo sapiens OX=9606 GN=KRT1 PE=1 SV=6	0	2	2	0.1712	0	1	1	1	517.262	1033.52	1033.52	0.95	0.00049	0	0	101560	HCD	MS2	30.9584	50	48.1686	15040	15040	15039	0/0		1.11	1078	0.009708	0.1069	0.019
1904247_Proteos_005.RAW	AF-M	Artificial Fingerprint	High	Sequest HT	Sequest HT (A2)	A	2	Unambiguous	SLYNLGGSK	SLYNLGGSK		1	1	P13647	P13647	Keratin, type II cytoskeletal 5 OS=Homo sapiens OX=9606 GN=KRT5 PE=1 SV=3	0	2	2	0.2531	0	1	1	1	469.751	938.494	938.494	-0.31	-0.00014	0	0	1.22558e+06	HCD	MS2	0	50	48.1874	15048	15048	15047	0/0		1.62	760	0.002625	0.06455	0.098
1904247_Proteos_005.RAW	AF-M	Artificial Fingerprint	High	Sequest HT	Sequest HT (A2)	A	2	Unambiguous	TEAESWYQTK	TEAESWYQTK		1	1	P13647	P13647	Keratin, type II cytoskeletal 5 OS=Homo sapiens OX=9606 GN=KRT5 PE=1 SV=3	0	2	2	0.4769	0	1	1	1	621.785	1242.56	1242.56	-0.34	-0.00021	0	0	1.62194e+06	HCD	MS2	0.766752	50	48.358	15097	15097	15096	0/0		2.16	1764	0.001797	0.03861	0.177
1904247_Proteos_005.RAW	AF-M	Artificial Fingerprint	High	Sequest HT	Sequest HT (A2)	A	2	Unambiguous	LAADDFR	LAADDFR		4	17	P02533; P13645; Q04695; P08779	Q14532; O76015; O76013; P02533; Q15323; Q7Z3Y7; P08727; Q2M2I5; Q14525; P13645; Q92764; P05783; P19012; P13646; Q04695; O76014; P08779	Keratin, type I cuticular Ha2 OS=Homo sapiens OX=9606 GN=KRT32 PE=2 SV=3; Keratin, type I cuticular Ha8 OS=Homo sapiens OX=9606 GN=KRT38 PE=1 SV=3; Keratin, type I cuticular Ha6 OS=Homo sapiens OX=9606 GN=KRT36 PE=2 SV=1; Keratin, type I cytoskeletal 14 OS=Homo sapiens OX=9606 GN=KRT14 PE=1 SV=4; Keratin, type I cuticular Ha1 OS=Homo sapiens OX=9606 GN=KRT31 PE=1 SV=3; Keratin, type I cytoskeleta…	0	2	2	0.4928	0	1	1	1	404.203	807.4	807.4	-0.03	-1e-05	0	0	396974	HCD	MS2	3.72038	50	48.4037	15111	15111	15110	0/0		1.38	655	0.0007241	0.01419	0.328
1904247_Proteos_005.RAW	AF-M	Artificial Fingerprint	High	Sequest HT	Sequest HT (A2)	A	2	Unambiguous	TNAENEFVTIKK	TNAENEFVTIKK		1	1	P04264	P04264	Keratin, type II cytoskeletal 1 OS=Homo sapiens OX=9606 GN=KRT1 PE=1 SV=6	1	3	3	0.1594	0	1	1	1	465.249	1393.73	1393.73	-0.01	-1e-05	0	0	419568	HCD	MS2	4.43626	50	48.433	15120	15120	15119	0/0		1.38	1317	0.004031	0.07636	0.072
1904247_Proteos_005.RAW	AF-M	Artificial Fingerprint	High	Sequest HT	Sequest HT (A2)	A	2	Unambiguous	LASYLDKVR	LASYLDKVR		4	7	P02533; P13645; Q04695; P08779	P02533; P08727; P13645; P19012; Q99456; Q04695; P08779	Keratin, type I cytoskeletal 14 OS=Homo sapiens OX=9606 GN=KRT14 PE=1 SV=4; Keratin, type I cytoskeletal 19 OS=Homo sapiens OX=9606 GN=KRT19 PE=1 SV=4; Keratin, type I cytoskeletal 10 OS=Homo sapiens OX=9606 GN=KRT10 PE=1 SV=6; Keratin, type I cytoskeletal 15 OS=Homo sapiens OX=9606 GN=KRT15 PE=1 SV=3; Keratin, type I cytoskeletal 12 OS=Homo sapiens OX=9606 GN=KRT12 PE=1 SV=1; Keratin, type I cyt…	1	2	2	0.5169	0	1	1	1	532.809	1064.61	1064.61	0.27	0.00014	0	0	494972	HCD	MS2	7.49484	50	48.6138	15181	15181	15180	0/0		2.36	360	0.0007241	0.006616	0.443
1904247_Proteos_005.RAW	AF-M	Artificial Fingerprint	High	Sequest HT	Sequest HT (A2)	A	2	Unambiguous	FGQGVDNAAGQAGNEAGR	FGQGVDnAAGQAGNEAGR	N7(Deamidated)	1	1	Q6UWP8	Q6UWP8	Suprabasin OS=Homo sapiens OX=9606 GN=SBSN PE=1 SV=2	0	2	2	0.0763	0	1	1	1	860.388	1719.77	1719.77	0.92	0.00079	0	0	61355.1	HCD	MS2	0	50	48.6228	15185	15185	15184	0/0		2.36	3594	0.002625	0.06763	0.091
1904247_Proteos_005.RAW	AF-M	Artificial Fingerprint	High	Sequest HT	Sequest HT (A2)	A	2	Unambiguous	HGSGSGQSSSYGPYGSGSGWSSSR	HGSGSGQSSSYGPYGSGSGWSSSR		1	1	Q86YZ3	Q86YZ3	Hornerin OS=Homo sapiens OX=9606 GN=HRNR PE=1 SV=2	0	3	3	0.5044	0	1	1	1	773.66	2318.97	2318.97	-0.07	-5e-05	0	0	3809951	HCD	MS2	0.878732	30.232	48.6881	15206	15206	15205	0/0		5.65	5419	0	7.61e-06	1.46
1904247_Proteos_005.RAW	AF-M	Artificial Fingerprint	High	Sequest HT	Sequest HT (A2)	A	2	Unambiguous	NMQDMVEDYR	NmQDmVEDYR	M2(Oxidation); M5(Oxidation)	1	1	P04264	P04264	Keratin, type II cytoskeletal 1 OS=Homo sapiens OX=9606 GN=KRT1 PE=1 SV=6	0	2	2	0.2649	0	1	1	1	666.763	1332.52	1332.52	0.08	5e-05	0	0	333124	HCD	MS2	7.59271	50	48.7477	15229	15229	15228	0/0		1.85	1032	0.0007241	0.01369	0.333
1904247_Proteos_005.RAW	AF-M	Artificial Fingerprint	High	Sequest HT	Sequest HT (A2)	A	2	Unambiguous	GGSGGSHGGGSGFGGESGGSYGGGEEASGSGGGYGGGSGK	GGSGGSHGGGSGFGGESGGSYGGGEEASGSGGGYGGGSGK		1	1	P35527	P35527	Keratin, type I cytoskeletal 9 OS=Homo sapiens OX=9606 GN=KRT9 PE=1 SV=3	0	3	3	0.6374	0	1	1	1	1075.1	3223.28	3223.28	0.04	5e-05	0	0	347603	HCD	MS2	0	50	48.7645	15236	15236	15235	0/0		4.44	3886	0	4.705e-05	1.186
1904247_Proteos_005.RAW	AF-M	Artificial Fingerprint	High	Sequest HT	Sequest HT (A2)	A	2	Unambiguous	NMQDMVEDYR	NmQDMVEDYR	M2(Oxidation)	1	1	P04264	P04264	Keratin, type II cytoskeletal 1 OS=Homo sapiens OX=9606 GN=KRT1 PE=1 SV=6	0	2	2	0.3201	0	1	1	1	658.766	1316.52	1316.52	-0.17	-0.00011	0	0	2.63095e+06	HCD	MS2	0	39.524	48.8498	15260	15260	15259	0/0		2.78	1131	0.0007241	0.01555	0.314
1904247_Proteos_005.RAW	AF-M	Artificial Fingerprint	High	Sequest HT	Sequest HT (A2)	A	2	Unambiguous	MTLDDFR	mTLDDFR	M1(Oxidation)	1	1	P35527	P35527	Keratin, type I cytoskeletal 9 OS=Homo sapiens OX=9606 GN=KRT9 PE=1 SV=3	0	2	2	0.4375	0	1	1	1	457.207	913.408	913.408	-0.89	-0.00041	0	0	220777	HCD	MS2	17.3489	50	48.8514	15261	15261	15259	0/0		1.28	986	0.002625	0.0504	0.136
1904247_Proteos_005.RAW	AF-M	Artificial Fingerprint	High	Sequest HT	Sequest HT (A2)	A	2	Unambiguous	TAAENDFVTLKK	TAAENDFVTLKK		1	1	P35908	P35908	Keratin, type II cytoskeletal 2 epidermal OS=Homo sapiens OX=9606 GN=KRT2 PE=1 SV=2	1	2	2	0.5316	0	1	1	1	668.859	1336.71	1336.71	-0.16	-0.0001	0	0	222113	HCD	MS2	2.78147	50	48.9023	15275	15275	15274	0/0		3.16	1176	0	0.002439	0.593
1904247_Proteos_005.RAW	AF-M	Artificial Fingerprint	High	Sequest HT	Sequest HT (A2)	A	2	Unambiguous	TAAENDFVTLKK	TAAEnDFVTLKK	N5(Deamidated)	1	1	P35908	P35908	Keratin, type II cytoskeletal 2 epidermal OS=Homo sapiens OX=9606 GN=KRT2 PE=1 SV=2	1	3	3	0.32	0	1	1	1	446.571	1337.7	1337.69	2.61	0.00116	0	0	1.64468e+06	HCD	MS2	48.0747	25.835	48.9409	15285	15285	15284	0/0		2.5	1260	0.002625	0.05098	0.135
1904247_Proteos_005.RAW	AF-M	Artificial Fingerprint	High	Sequest HT	Sequest HT (A2)	A	2	Unambiguous	HGSGSGQSSSYSPYGSGSGWSSSR	HGSGSGQSSSYSPYGSGSGWSSSR		1	1	Q86YZ3	Q86YZ3	Hornerin OS=Homo sapiens OX=9606 GN=HRNR PE=1 SV=2	0	3	3	0.5856	0	1	1	1	783.663	2348.98	2348.98	-0.35	-0.00028	0	0	311003	HCD	MS2	0	50	48.9943	15300	15300	15299	0/0		4.73	5510	0	0.0001354	1.027
1904247_Proteos_005.RAW	AF-M	Artificial Fingerprint	High	Sequest HT	Sequest HT (A2)	A	2	Unambiguous	LENEIQTYR	LENEIQTYR		1	1	P13645	P13645	Keratin, type I cytoskeletal 10 OS=Homo sapiens OX=9606 GN=KRT10 PE=1 SV=6	0	2	2	0.3399	0	1	1	1	583.296	1165.58	1165.58	-0.22	-0.00013	0	0	224884	HCD	MS2	15.089	50	49.0054	15304	15304	15303	0/0		2.03	1213	0.0007241	0.01024	0.377
1904247_Proteos_005.RAW	AF-M	Artificial Fingerprint	High	Sequest HT	Sequest HT (A2)	A	2	Unambiguous	SLVNLGGSK	SLVNLGGSK		1	1	P04264	P04264	Keratin, type II cytoskeletal 1 OS=Homo sapiens OX=9606 GN=KRT1 PE=1 SV=6	0	2	2	0.3497	0	1	1	1	437.753	874.499	874.499	-0.42	-0.00018	0	0	712754	HCD	MS2	6.67396	50	49.0315	15314	15314	15313	0/0		1.83	906	0.001797	0.0328	0.202
1904247_Proteos_005.RAW	AF-M	Artificial Fingerprint	High	Sequest HT	Sequest HT (A2)	A	2	Selected	IKFEMEQNLR	IKFEmEQNLR	M5(Oxidation)	1	1	P35527	P35527	Keratin, type I cytoskeletal 9 OS=Homo sapiens OX=9606 GN=KRT9 PE=1 SV=3	1	3	3		0.029	3	3	4	441.896	1323.67	1323.67	-0.44	-0.00019	0	0	156473	HCD	MS2	34.0101	50	49.2487	15379	15379	15378	0/0		1.34	1488	0.002377	0.04747	0.145
1904247_Proteos_005.RAW	AF-M	Artificial Fingerprint	High	Sequest HT	Sequest HT (A2)	A	2	Unambiguous	QLDSIVGER	QLDSIVGER		2	3	A0A0S2Z428; P13647	A0A0S2Z428; P48668; P13647	HCG2039812 OS=Homo sapiens (Human) OX=9606 GN=KRT6A hCG_2039812; Keratin, type II cytoskeletal 6C OS=Homo sapiens OX=9606 GN=KRT6C PE=1 SV=3; Keratin, type II cytoskeletal 5 OS=Homo sapiens OX=9606 GN=KRT5 PE=1 SV=3	0	2	2	0.1437	0	1	1	1	508.773	1016.54	1016.54	1.08	0.00055	0	0	92319.1	HCD	MS2	54.5188	50	49.2878	15392	15392	15391	0/0		1.67	1014	0.001797	0.03431	0.195
1904247_Proteos_005.RAW	AF-M	Artificial Fingerprint	High	Sequest HT	Sequest HT (A2)	A	2	Unambiguous	FNTANDDNVTQVR	FNTANDDNVTQVR		1	1	P04040	P04040	Catalase OS=Homo sapiens OX=9606 GN=CAT PE=1 SV=3	0	2	2	0.5733	0	1	1	1	747.352	1493.7	1493.7	-1.13	-0.00085	0	0	167817	HCD	MS2	0	50	49.5497	15461	15461	15460	0/0		3.07	2255	0	0.0009832	0.729
1904247_Proteos_005.RAW	AF-M	Artificial Fingerprint	High	Sequest HT	Sequest HT (A2)	A	2	Unambiguous	TKYETELNLR	TKYETELNLR		1	1	P02533	P02533	Keratin, type I cytoskeletal 14 OS=Homo sapiens OX=9606 GN=KRT14 PE=1 SV=4	1	3	3	0.2372	0	1	1	1	422.894	1266.67	1266.67	-0.42	-0.00018	0	0	506540	HCD	MS2	3.49439	50	49.5813	15469	15469	15468	0/0		2.15	1177	0.0007241	0.02182	0.263
1904247_Proteos_005.RAW	AF-M	Artificial Fingerprint	High	Sequest HT	Sequest HT (A2)	A	2	Unambiguous	FLDQNLQK	FLDQNLQK		1	1	P15924	P15924	Desmoplakin OS=Homo sapiens OX=9606 GN=DSP PE=1 SV=3	0	2	2	0.1325	0	1	1	1	503.272	1005.54	1005.54	-0.19	-0.0001	0	0	3.64851e+06	HCD	MS2	0	25.364	49.6823	15494	15494	15493	0/0		1.66	742	0.002377	0.04791	0.144
1904247_Proteos_005.RAW	AF-M	Artificial Fingerprint	High	Sequest HT	Sequest HT (A2)	A	2	Unambiguous	IQDWYDK	IQDWYDK		1	1	P35527	P35527	Keratin, type I cytoskeletal 9 OS=Homo sapiens OX=9606 GN=KRT9 PE=1 SV=3	0	2	2	0.2044	0	1	1	1	484.23	967.452	967.452	0.04	2e-05	0	0	10382306	HCD	MS2	0.657589	7.906	49.7321	15510	15510	15509	0/0		1.81	956	0.008344	0.1008	0.029
1904247_Proteos_005.RAW	AF-M	Artificial Fingerprint	High	Sequest HT	Sequest HT (A2)	A	2	Unambiguous	NMQDMVEDYR	NmQDmVEDYR	M2(Oxidation); M5(Oxidation)	1	1	P04264	P04264	Keratin, type II cytoskeletal 1 OS=Homo sapiens OX=9606 GN=KRT1 PE=1 SV=6	0	2	2	0.1959	0	1	1	1	666.763	1332.52	1332.52	-0.38	-0.00025	0	0	199700	HCD	MS2	11.3205	50	49.753	15516	15516	15515	0/0		1.94	1021	0.001797	0.03786	0.18
1904247_Proteos_005.RAW	AF-M	Artificial Fingerprint	High	Sequest HT	Sequest HT (A2)	A	2	Unambiguous	GGSGGSHGGGSGFGGESGGSYGGGEEASGSGGGYGGGSGK	GGSGGSHGGGSGFGGESGGSYGGGEEASGSGGGYGGGSGK		1	1	P35527	P35527	Keratin, type I cytoskeletal 9 OS=Homo sapiens OX=9606 GN=KRT9 PE=1 SV=3	0	3	3	0.5977	0	1	1	1	1075.1	3223.28	3223.28	-0.07	-8e-05	0	0	179544	HCD	MS2	0	50	49.7657	15519	15519	15518	0/0		4.3	3902	0	0.0002853	0.915
1904247_Proteos_005.RAW	AF-M	Artificial Fingerprint	High	Sequest HT	Sequest HT (A2)	A	2	Unambiguous	ATAVVDGAFK	ATAVVDGAFK		1	1	P32119	P32119	Peroxiredoxin-2 OS=Homo sapiens OX=9606 GN=PRDX2 PE=1 SV=5	0	2	2	0.5061	0	1	1	1	489.766	978.526	978.525	0.15	7e-05	0	0	466372	HCD	MS2	12.7386	50	49.7897	15527	15527	15525	0/0		2.45	727	0.0007241	0.005849	0.461
1904247_Proteos_005.RAW	AF-M	Artificial Fingerprint	High	Sequest HT	Sequest HT (A2)	A	2	Unambiguous	LKYENEVALR	LKYENEVALR		1	1	P13645	P13645	Keratin, type I cytoskeletal 10 OS=Homo sapiens OX=9606 GN=KRT10 PE=1 SV=6	1	3	3	0.1	0	1	1	1	412.231	1234.68	1234.68	0.55	0.00023	0	0	42464.9	HCD	MS2	30.7227	50	49.8113	15533	15533	15532	0/0		1.1	708	0.007067	0.09278	0.042
1904247_Proteos_005.RAW	AF-M	Artificial Fingerprint	High	Sequest HT	Sequest HT (A2)	A	2	Unambiguous	NMQDMVEDYR	NmQDMVEDYR	M2(Oxidation)	1	1	P04264	P04264	Keratin, type II cytoskeletal 1 OS=Homo sapiens OX=9606 GN=KRT1 PE=1 SV=6	0	2	2	0.4047	0	1	1	1	658.766	1316.52	1316.52	-0.45	-0.00029	0	0	231540	HCD	MS2	0	50	49.8554	15546	15546	15545	0/0		2.15	1112	0	0.002147	0.612
1904247_Proteos_005.RAW	AF-M	Artificial Fingerprint	High	Sequest HT	Sequest HT (A2)	A	2	Unambiguous	MSVEADINGLRR	mSVEADInGLRR	M1(Oxidation); N8(Deamidated)	1	2	P02533	P02533; P08727	Keratin, type I cytoskeletal 14 OS=Homo sapiens OX=9606 GN=KRT14 PE=1 SV=4; Keratin, type I cytoskeletal 19 OS=Homo sapiens OX=9606 GN=KRT19 PE=1 SV=4	1	3	3	0.2806	0	1	1	1	459.898	1377.68	1377.68	-0.65	-0.0003	0	0	378629	HCD	MS2	20.1333	50	49.8685	15550	15550	15549	0/0		1.96	1736	0.002625	0.06351	0.101
1904247_Proteos_005.RAW	AF-M	Artificial Fingerprint	High	Sequest HT	Sequest HT (A2)	A	2	Unambiguous	TAAENEFVTLKK	TAAENEFVTLKK		2	4	P04259; A0A0S2Z428	P04259; A0A0S2Z428; P48668; P12035	Keratin, type II cytoskeletal 6B OS=Homo sapiens OX=9606 GN=KRT6B PE=1 SV=5; HCG2039812 OS=Homo sapiens (Human) OX=9606 GN=KRT6A hCG_2039812; Keratin, type II cytoskeletal 6C OS=Homo sapiens OX=9606 GN=KRT6C PE=1 SV=3; Keratin, type II cytoskeletal 3 OS=Homo sapiens OX=9606 GN=KRT3 PE=1 SV=3	1	3	3	0.125	0	1	1	1	450.914	1350.73	1350.73	0.34	0.00015	0	0	118520	HCD	MS2	62.5617	50	49.8953	15556	15556	15554	0/0		1.6	1108	0.0007241	0.01812	0.291
1904247_Proteos_005.RAW	AF-M	Artificial Fingerprint	High	Sequest HT	Sequest HT (A2)	A	2	Unambiguous	TAAENDFVTLKK	TAAEnDFVTLKK	N5(Deamidated)	1	1	P35908	P35908	Keratin, type II cytoskeletal 2 epidermal OS=Homo sapiens OX=9606 GN=KRT2 PE=1 SV=2	1	2	2	0.365	0	1	1	1	669.352	1337.7	1337.69	1.02	0.00068	0	0	100224	HCD	MS2	16.3922	50	49.9094	15560	15560	15558	0/0		2	1398	0.001406	0.02797	0.226
1904247_Proteos_005.RAW	AF-M	Artificial Fingerprint	High	Sequest HT	Sequest HT (A2)	A	2	Unambiguous	MTLDDFR	mTLDDFR	M1(Oxidation)	1	1	P35527	P35527	Keratin, type I cytoskeletal 9 OS=Homo sapiens OX=9606 GN=KRT9 PE=1 SV=3	0	2	2	0.4732	0	1	1	1	457.208	913.408	913.408	-0.29	-0.00013	0	0	6706663	HCD	MS2	0.486301	12.921	49.9603	15576	15576	15575	0/0		2.05	893	0.0054	0.08512	0.055
1904247_Proteos_005.RAW	AF-M	Artificial Fingerprint	High	Sequest HT	Sequest HT (A2)	A	2	Unambiguous	SLVNLGGSK	SLVNLGGSK		1	1	P04264	P04264	Keratin, type II cytoskeletal 1 OS=Homo sapiens OX=9606 GN=KRT1 PE=1 SV=6	0	2	2	0.3333	0	1	1	1	437.753	874.499	874.499	0.14	6e-05	0	0	324735	HCD	MS2	30.4457	50	50.033	15596	15596	15595	0/0		1.77	869	0.001797	0.03521	0.191
1904247_Proteos_005.RAW	AF-M	Artificial Fingerprint	High	Sequest HT	Sequest HT (A2)	A	2	Unambiguous	SLVNLGGSK	SLVnLGGSK	N4(Deamidated)	1	1	P04264	P04264	Keratin, type II cytoskeletal 1 OS=Homo sapiens OX=9606 GN=KRT1 PE=1 SV=6	0	2	2	0.3072	0	1	1	1	438.244	875.481	875.483	-2.24	-0.00098	0	0	407040	HCD	MS2	36.7781	50	50.0739	15606	15606	15605	0/0		1.66	788	0.002625	0.06014	0.109
1904247_Proteos_005.RAW	AF-M	Artificial Fingerprint	High	Sequest HT	Sequest HT (A2)	A	2	Unambiguous	LENEIQTYR	LEnEIQTYR	N3(Deamidated)	1	1	P13645	P13645	Keratin, type I cytoskeletal 10 OS=Homo sapiens OX=9606 GN=KRT10 PE=1 SV=6	0	2	2	0.1325	0	1	1	1	583.788	1166.57	1166.57	-0.44	-0.00025	0	0	1.31909e+06	HCD	MS2	4.20139	50	50.1842	15636	15636	15635	0/0		2.49	1299	0.0007241	0.006992	0.435
1904247_Proteos_005.RAW	AF-M	Artificial Fingerprint	High	Sequest HT	Sequest HT (A2)	A	2	Unambiguous	TAAENEFVTLKK	TAAENEFVTLKK		2	4	P04259; A0A0S2Z428	P04259; A0A0S2Z428; P48668; P12035	Keratin, type II cytoskeletal 6B OS=Homo sapiens OX=9606 GN=KRT6B PE=1 SV=5; HCG2039812 OS=Homo sapiens (Human) OX=9606 GN=KRT6A hCG_2039812; Keratin, type II cytoskeletal 6C OS=Homo sapiens OX=9606 GN=KRT6C PE=1 SV=3; Keratin, type II cytoskeletal 3 OS=Homo sapiens OX=9606 GN=KRT3 PE=1 SV=3	1	2	2	0.3974	0	1	1	1	675.867	1350.73	1350.73	-0.08	-6e-05	0	0	787231	HCD	MS2	7.66793	50	50.2095	15645	15645	15643	0/0		3.02	1108	0.0007241	0.003459	0.54
1904247_Proteos_005.RAW	AF-M	Artificial Fingerprint	High	Sequest HT	Sequest HT (A2)	A	2	Unambiguous	LEQEIATYR	LEQEIATYR		3	8	P02533; Q04695; P08779	P02533; P08727; Q8N1A0; P19012; P13646; Q04695; P08779; P35900	Keratin, type I cytoskeletal 14 OS=Homo sapiens OX=9606 GN=KRT14 PE=1 SV=4; Keratin, type I cytoskeletal 19 OS=Homo sapiens OX=9606 GN=KRT19 PE=1 SV=4; Keratin-like protein KRT222 OS=Homo sapiens OX=9606 GN=KRT222 PE=2 SV=1; Keratin, type I cytoskeletal 15 OS=Homo sapiens OX=9606 GN=KRT15 PE=1 SV=3; Keratin, type I cytoskeletal 13 OS=Homo sapiens OX=9606 GN=KRT13 PE=1 SV=4; Keratin, type I cytosk…	0	2	2	0.2959	0	1	1	1	561.793	1122.58	1122.58	0.6	0.00034	0	0	78457.6	HCD	MS2	34.2225	50	50.2883	15671	15671	15669	0/0		0.98	1041	0.006305	0.08698	0.052
1904247_Proteos_005.RAW	AF-M	Artificial Fingerprint	High	Sequest HT	Sequest HT (A2)	A	2	Unambiguous	LAADDFR	LAADDFR		4	17	P02533; P13645; Q04695; P08779	Q14532; O76015; O76013; P02533; Q15323; Q7Z3Y7; P08727; Q2M2I5; Q14525; P13645; Q92764; P05783; P19012; P13646; Q04695; O76014; P08779	Keratin, type I cuticular Ha2 OS=Homo sapiens OX=9606 GN=KRT32 PE=2 SV=3; Keratin, type I cuticular Ha8 OS=Homo sapiens OX=9606 GN=KRT38 PE=1 SV=3; Keratin, type I cuticular Ha6 OS=Homo sapiens OX=9606 GN=KRT36 PE=2 SV=1; Keratin, type I cytoskeletal 14 OS=Homo sapiens OX=9606 GN=KRT14 PE=1 SV=4; Keratin, type I cuticular Ha1 OS=Homo sapiens OX=9606 GN=KRT31 PE=1 SV=3; Keratin, type I cytoskeleta…	0	2	2	0.4025	0	1	1	1	404.203	807.399	807.4	-0.63	-0.00025	0	0	275394	HCD	MS2	26.589	50	50.4787	15728	15728	15727	0/0		1.59	655	0.0007241	0.02017	0.275
1904247_Proteos_005.RAW	AF-M	Artificial Fingerprint	High	Sequest HT	Sequest HT (A2)	A	2	Unambiguous	IQDWYDK	IQDWYDK		1	1	P35527	P35527	Keratin, type I cytoskeletal 9 OS=Homo sapiens OX=9606 GN=KRT9 PE=1 SV=3	0	2	2	0.2048	0	1	1	1	484.23	967.452	967.452	-0.21	-0.0001	0	0	2376771	HCD	MS2	14.622	32.723	50.736	15803	15803	15802	0/0		1.66	956	0.006305	0.08794	0.05
1904247_Proteos_005.RAW	AF-M	Artificial Fingerprint	High	Sequest HT	Sequest HT (A2)	A	2	Unambiguous	GGSGGSHGGGSGFGGESGGSYGGGEEASGSGGGYGGGSGK	GGSGGSHGGGSGFGGESGGSYGGGEEASGSGGGYGGGSGK		1	1	P35527	P35527	Keratin, type I cytoskeletal 9 OS=Homo sapiens OX=9606 GN=KRT9 PE=1 SV=3	0	3	3	0.5777	0	1	1	1	1075.1	3223.28	3223.28	-0.07	-8e-05	0	0	320822	HCD	MS2	1.48848	50	50.7692	15814	15814	15813	0/0		4.12	3902	0	0.0001441	1.018
1904247_Proteos_005.RAW	AF-M	Artificial Fingerprint	High	Sequest HT	Sequest HT (A2)	A	2	Unambiguous	LKYENEVALR	LKYENEVALR		1	1	P13645	P13645	Keratin, type I cytoskeletal 10 OS=Homo sapiens OX=9606 GN=KRT10 PE=1 SV=6	1	3	3	0.3672	0	1	1	1	412.231	1234.68	1234.68	0.48	0.0002	0	0	30647032	HCD	MS2	0.0415516	1.895	50.8201	15830	15830	15829	0/0		2.56	708	0.001797	0.04575	0.151
1904247_Proteos_005.RAW	AF-M	Artificial Fingerprint	High	Sequest HT	Sequest HT (A2)	A	2	Unambiguous	NMQDMVEDYR	NmQDMVEDYR	M2(Oxidation)	1	1	P04264	P04264	Keratin, type II cytoskeletal 1 OS=Homo sapiens OX=9606 GN=KRT1 PE=1 SV=6	0	2	2	0.3696	0	1	1	1	658.766	1316.52	1316.52	-0.26	-0.00017	0	0	125690	HCD	MS2	8.66518	50	50.8619	15844	15844	15843	0/0		1.38	1124	0.001797	0.03253	0.203
1904247_Proteos_005.RAW	AF-M	Artificial Fingerprint	High	Sequest HT	Sequest HT (A2)	A	2	Selected	TNAENEFVTIKK	TNAEnEFVTIKK	N5(Deamidated)	1	1	P04264	P04264	Keratin, type II cytoskeletal 1 OS=Homo sapiens OX=9606 GN=KRT1 PE=1 SV=6	1	3	3		0.0049	2	2	2	465.576	1394.71	1394.72	-1.27	-0.00059	0	0	230612	HCD	MS2	79.7203	50	50.8965	15855	15855	15854	0/0		2.03	1571	0.002625	0.04886	0.141
1904247_Proteos_005.RAW	AF-M	Artificial Fingerprint	High	Sequest HT	Sequest HT (A2)	A	2	Unambiguous	LKYENEVALR	LKYENEVALR		1	1	P13645	P13645	Keratin, type I cytoskeletal 10 OS=Homo sapiens OX=9606 GN=KRT10 PE=1 SV=6	1	2	2	0.3265	0	1	1	1	617.843	1234.68	1234.68	-0.6	-0.00037	0	0	6.14873e+06	HCD	MS2	0.777444	18.942	50.9498	15873	15873	15872	0/0		2.91	765	0.0007241	0.01255	0.347
1904247_Proteos_005.RAW	AF-M	Artificial Fingerprint	High	Sequest HT	Sequest HT (A2)	A	2	Unambiguous	MTLDDFR	mTLDDFR	M1(Oxidation)	1	1	P35527	P35527	Keratin, type I cytoskeletal 9 OS=Homo sapiens OX=9606 GN=KRT9 PE=1 SV=3	0	2	2	0.4307	0	1	1	1	457.208	913.408	913.408	-0.42	-0.00019	0	0	18238964	HCD	MS2	1.16621	4.197	50.9623	15876	15876	15875	0/0		2.02	999	0.008659	0.1045	0.023
1904247_Proteos_005.RAW	AF-M	Artificial Fingerprint	High	Sequest HT	Sequest HT (A2)	A	2	Unambiguous	VQLVVGDGR	VQLVVGDGR		1	2	H7BY58	P22061; H7BY58	Protein-L-isoaspartate(D-aspartate) O-methyltransferase OS=Homo sapiens OX=9606 GN=PCMT1 PE=1 SV=4; Protein-L-isoaspartate O-methyltransferase (EC 2.1.1.77) OS=Homo sapiens (Human) OX=9606 GN=PCMT1	0	2	2	0.3378	0	1	1	1	471.772	942.537	942.537	0.09	4e-05	0	0	69022.2	HCD	MS2	24.3456	50	51.088	15913	15913	15912	0/0		1.48	432	0.002625	0.06403	0.1
1904247_Proteos_005.RAW	AF-M	Artificial Fingerprint	High	Sequest HT	Sequest HT (A2)	A	2	Unambiguous	LENEIQTYR	LEnEIQTYR	N3(Deamidated)	1	1	P13645	P13645	Keratin, type I cytoskeletal 10 OS=Homo sapiens OX=9606 GN=KRT10 PE=1 SV=6	0	2	2	0.2077	0	1	1	1	583.787	1166.57	1166.57	-1.48	-0.00086	0	0	161514	HCD	MS2	10.2105	50	51.1868	15946	15946	15945	0/0		1.83	1243	0.0007241	0.01239	0.349
1904247_Proteos_005.RAW	AF-M	Artificial Fingerprint	High	Sequest HT	Sequest HT (A2)	A	2	Unambiguous	LSSEVEALR	LSSEVEALR		1	1	P15924	P15924	Desmoplakin OS=Homo sapiens OX=9606 GN=DSP PE=1 SV=3	0	2	2	0.2423	0	1	1	1	502.275	1003.54	1003.54	0.13	6e-05	0	0	254651	HCD	MS2	23.0075	50	51.1885	15947	15947	15945	0/0		1.94	1002	0.001797	0.0372	0.183
1904247_Proteos_005.RAW	AF-M	Artificial Fingerprint	High	Sequest HT	Sequest HT (A2)	A	2	Unambiguous	NTLTQTTENLR	NTLTQTTENLR		1	1	P15924	P15924	Desmoplakin OS=Homo sapiens OX=9606 GN=DSP PE=1 SV=3	0	2	2	0.4862	0	1	1	1	645.836	1290.67	1290.66	0.4	0.00026	0	0	124488	HCD	MS2	31.824	50	51.2002	15953	15953	15949	0/0		1.81	1385	0.0007241	0.02105	0.269
1904247_Proteos_005.RAW	AF-M	Artificial Fingerprint	High	Sequest HT	Sequest HT (A2)	A	2	Unambiguous	LEQEIATYR	LEQEIATYR		3	8	P02533; Q04695; P08779	P02533; P08727; Q8N1A0; P19012; P13646; Q04695; P08779; P35900	Keratin, type I cytoskeletal 14 OS=Homo sapiens OX=9606 GN=KRT14 PE=1 SV=4; Keratin, type I cytoskeletal 19 OS=Homo sapiens OX=9606 GN=KRT19 PE=1 SV=4; Keratin-like protein KRT222 OS=Homo sapiens OX=9606 GN=KRT222 PE=2 SV=1; Keratin, type I cytoskeletal 15 OS=Homo sapiens OX=9606 GN=KRT15 PE=1 SV=3; Keratin, type I cytoskeletal 13 OS=Homo sapiens OX=9606 GN=KRT13 PE=1 SV=4; Keratin, type I cytosk…	0	2	2	0.4118	0	1	1	1	561.792	1122.58	1122.58	-1.79	-0.00101	0	0	200330	HCD	MS2	0	50	51.2972	15992	15992	15991	0/0		2.04	1032	0.0007241	0.004839	0.49
1904247_Proteos_005.RAW	AF-M	Artificial Fingerprint	High	Sequest HT	Sequest HT (A2)	A	2	Unambiguous	ALDGINSGITHAGR	ALDGINSGITHAGR		1	1	Q6UWP8	Q6UWP8	Suprabasin OS=Homo sapiens OX=9606 GN=SBSN PE=1 SV=2	0	3	3	0.4909	0	1	1	1	461.246	1381.72	1381.72	3.43	0.00158	0	0	385063	HCD	MS2	0	50	51.4102	16031	16031	16030	0/0		2.2	1392	0.0007241	0.006151	0.454
1904247_Proteos_005.RAW	AF-M	Artificial Fingerprint	High	Sequest HT	Sequest HT (A2)	A	2	Unambiguous	SLVNLGGSK	SLVNLGGSK		1	1	P04264	P04264	Keratin, type II cytoskeletal 1 OS=Homo sapiens OX=9606 GN=KRT1 PE=1 SV=6	0	2	2	0.4356	0	1	1	1	437.753	874.498	874.499	-0.98	-0.00043	0	0	184447	HCD	MS2	27.0787	50	51.4254	16036	16036	16034	0/0		1.63	915	0.0007241	0.02468	0.245
1904247_Proteos_005.RAW	AF-M	Artificial Fingerprint	High	Sequest HT	Sequest HT (A2)	A	2	Unambiguous	ASLENSLEETK	ASLENSLEETK		2	2	P02533; P08779	P02533; P08779	Keratin, type I cytoskeletal 14 OS=Homo sapiens OX=9606 GN=KRT14 PE=1 SV=4; Keratin, type I cytoskeletal 16 OS=Homo sapiens OX=9606 GN=KRT16 PE=1 SV=4	0	2	2	0.4444	0	1	1	1	610.804	1220.6	1220.6	0.12	7e-05	0	0	389928	HCD	MS2	0	50	51.4469	16042	16042	16041	0/0		1.89	1293	0.0007241	0.006415	0.448
1904247_Proteos_005.RAW	AF-M	Artificial Fingerprint	High	Sequest HT	Sequest HT (A2)	A	2	Unambiguous	LAADDFR	LAADDFR		4	17	P02533; P13645; Q04695; P08779	Q14532; O76015; O76013; P02533; Q15323; Q7Z3Y7; P08727; Q2M2I5; Q14525; P13645; Q92764; P05783; P19012; P13646; Q04695; O76014; P08779	Keratin, type I cuticular Ha2 OS=Homo sapiens OX=9606 GN=KRT32 PE=2 SV=3; Keratin, type I cuticular Ha8 OS=Homo sapiens OX=9606 GN=KRT38 PE=1 SV=3; Keratin, type I cuticular Ha6 OS=Homo sapiens OX=9606 GN=KRT36 PE=2 SV=1; Keratin, type I cytoskeletal 14 OS=Homo sapiens OX=9606 GN=KRT14 PE=1 SV=4; Keratin, type I cuticular Ha1 OS=Homo sapiens OX=9606 GN=KRT31 PE=1 SV=3; Keratin, type I cytoskeleta…	0	2	2	0.4877	0	1	1	1	404.204	807.401	807.4	1.56	0.00063	0	0	214965	HCD	MS2	0	50	51.4872	16054	16054	16053	0/0		1.62	593	0.0007241	0.01762	0.295
1904247_Proteos_005.RAW	AF-M	Artificial Fingerprint	High	Sequest HT	Sequest HT (A2)	A	2	Unambiguous	LTGMAFR	LTGMAFR		1	2	P04406	O14556; P04406	Glyceraldehyde-3-phosphate dehydrogenase, testis-specific OS=Homo sapiens OX=9606 GN=GAPDHS PE=1 SV=2; Glyceraldehyde-3-phosphate dehydrogenase OS=Homo sapiens OX=9606 GN=GAPDH PE=1 SV=3	0	2	2	0.4564	0	1	1	1	398.214	795.42	795.418	2.49	0.00099	0	0	530168	HCD	MS2	0	50	51.547	16070	16070	16069	0/0		1.49	462	0.0007241	0.02391	0.249
1904247_Proteos_005.RAW	AF-M	Artificial Fingerprint	High	Sequest HT	Sequest HT (A2)	A	2	Unambiguous	GGSGGSHGGGSGFGGESGGSYGGGEEASGSGGGYGGGSGK	GGSGGSHGGGSGFGGESGGSYGGGEEASGSGGGYGGGSGK		1	1	P35527	P35527	Keratin, type I cytoskeletal 9 OS=Homo sapiens OX=9606 GN=KRT9 PE=1 SV=3	0	3	3	0.5924	0	1	1	1	1075.1	3223.28	3223.28	-0.64	-0.00069	0	0	249520	HCD	MS2	3.61454	50	51.778	16146	16146	16145	0/0		4.22	3847	0	9.343e-05	1.083
1904247_Proteos_005.RAW	AF-M	Artificial Fingerprint	High	Sequest HT	Sequest HT (A2)	A	2	Unambiguous	NMQDMVEDYR	NmQDMVEDYR	M2(Oxidation)	1	1	P04264	P04264	Keratin, type II cytoskeletal 1 OS=Homo sapiens OX=9606 GN=KRT1 PE=1 SV=6	0	2	2	0.365	0	1	1	1	658.766	1316.52	1316.52	-0.35	-0.00023	0	0	79287.9	HCD	MS2	30.8601	50	51.8704	16175	16175	16174	0/0		1.37	1122	0.002625	0.06863	0.089
1904247_Proteos_005.RAW	AF-M	Artificial Fingerprint	High	Sequest HT	Sequest HT (A2)	A	2	Unambiguous	MTLDDFR	mTLDDFR	M1(Oxidation)	1	1	P35527	P35527	Keratin, type I cytoskeletal 9 OS=Homo sapiens OX=9606 GN=KRT9 PE=1 SV=3	0	2	2	0.3153	0	1	1	1	457.208	913.409	913.408	0.51	0.00023	0	0	4812965	HCD	MS2	0	16.725	51.9655	16201	16201	16200	0/0		2.03	980	0.001406	0.02794	0.226
1904247_Proteos_005.RAW	AF-M	Artificial Fingerprint	High	Sequest HT	Sequest HT (A2)	A	2	Selected	IQDWYDK	IQDWYDK		1	1	P35527	P35527	Keratin, type I cytoskeletal 9 OS=Homo sapiens OX=9606 GN=KRT9 PE=1 SV=3	0	2	2		0.0071	2	2	2	484.231	967.454	967.452	2.56	0.00124	0	0	521819	HCD	MS2	28.6818	50	52.1265	16249	16249	16248	0/0		1.39	1049	0.002625	0.06901	0.088
1904247_Proteos_005.RAW	AF-M	Artificial Fingerprint	High	Sequest HT	Sequest HT (A2)	A	2	Unambiguous	LAADDFR	LAADDFR		4	17	P02533; P13645; Q04695; P08779	Q14532; O76015; O76013; P02533; Q15323; Q7Z3Y7; P08727; Q2M2I5; Q14525; P13645; Q92764; P05783; P19012; P13646; Q04695; O76014; P08779	Keratin, type I cuticular Ha2 OS=Homo sapiens OX=9606 GN=KRT32 PE=2 SV=3; Keratin, type I cuticular Ha8 OS=Homo sapiens OX=9606 GN=KRT38 PE=1 SV=3; Keratin, type I cuticular Ha6 OS=Homo sapiens OX=9606 GN=KRT36 PE=2 SV=1; Keratin, type I cytoskeletal 14 OS=Homo sapiens OX=9606 GN=KRT14 PE=1 SV=4; Keratin, type I cuticular Ha1 OS=Homo sapiens OX=9606 GN=KRT31 PE=1 SV=3; Keratin, type I cytoskeleta…	0	2	2	0.3271	0	1	1	1	404.203	807.399	807.4	-0.1	-4e-05	0	0	108237	HCD	MS2	15.999	50	52.4934	16361	16361	16360	0/0		1.07	655	0.00493	0.08292	0.059
1904247_Proteos_005.RAW	AF-M	Artificial Fingerprint	High	Sequest HT	Sequest HT (A2)	A	2	Unambiguous	SLVNLGGSK	SLVNLGGSK		1	1	P04264	P04264	Keratin, type II cytoskeletal 1 OS=Homo sapiens OX=9606 GN=KRT1 PE=1 SV=6	0	2	2	0.1682	0	1	1	1	437.754	874.5	874.499	1.25	0.00055	0	0	173350	HCD	MS2	40.428	50	52.583	16389	16389	16388	0/0		1.07	866	0.002625	0.05722	0.117
1904247_Proteos_005.RAW	AF-M	Artificial Fingerprint	High	Sequest HT	Sequest HT (A2)	A	2	Unambiguous	APSTYGGGLSVSSSR	APSTYGGGLSVSSSR		1	1	P02533	P02533	Keratin, type I cytoskeletal 14 OS=Homo sapiens OX=9606 GN=KRT14 PE=1 SV=4	0	2	2	0.6401	0	1	1	1	713.352	1425.7	1425.7	0.07	5e-05	0	0	4424253	HCD	MS2	0	24.238	52.6622	16415	16415	16414	0/0		3.64	2260	0	0.0001938	0.973
1904247_Proteos_005.RAW	AF-M	Artificial Fingerprint	High	Sequest HT	Sequest HT (A2)	A	2	Unambiguous	EAVSLLR	EAVSLLR		1	1	Q13835	Q13835	Plakophilin-1 OS=Homo sapiens OX=9606 GN=PKP1 PE=1 SV=2	0	2	2	0.1933	0	1	1	2	394.237	787.467	787.467	-0.18	-7e-05	0	0	80318.2	HCD	MS2	0	50	52.6745	16420	16420	16419	0/0		1.19	904	0.00363	0.0711	0.083
1904247_Proteos_005.RAW	AF-M	Artificial Fingerprint	High	Sequest HT	Sequest HT (A2)	A	2	Unambiguous	NMQDMVEDYR	NmQDmVEDYR	M2(Oxidation); M5(Oxidation)	1	1	P04264	P04264	Keratin, type II cytoskeletal 1 OS=Homo sapiens OX=9606 GN=KRT1 PE=1 SV=6	0	2	2	0.0882	0	1	1	1	666.765	1332.52	1332.52	2.37	0.00158	0	0	154212	HCD	MS2	0	50	52.7692	16451	16451	16450	0/0		1.36	1017	0.002625	0.06635	0.094
1904247_Proteos_005.RAW	AF-M	Artificial Fingerprint	High	Sequest HT	Sequest HT (A2)	A	2	Unambiguous	GGSGGSHGGGSGFGGESGGSYGGGEEASGSGGGYGGGSGK	GGSGGSHGGGSGFGGESGGSYGGGEEASGSGGGYGGGSGK		1	1	P35527	P35527	Keratin, type I cytoskeletal 9 OS=Homo sapiens OX=9606 GN=KRT9 PE=1 SV=3	0	3	3	0.6162	0	1	1	1	1075.1	3223.28	3223.28	0.16	0.00017	0	0	313131	HCD	MS2	0	50	52.7866	16457	16457	16456	0/0		4.56	3967	0	6.025e-06	1.495
1904247_Proteos_005.RAW	AF-M	Artificial Fingerprint	High	Sequest HT	Sequest HT (A2)	A	2	Unambiguous	QTVEADVNGLR	QTVEADVnGLR	N8(Deamidated)	1	1	P08779	P08779	Keratin, type I cytoskeletal 16 OS=Homo sapiens OX=9606 GN=KRT16 PE=1 SV=4	0	2	2	0.4479	0	1	1	1	601.805	1202.6	1202.6	2.1	0.00126	0	0	109928	HCD	MS2	0	50	52.8655	16479	16479	16478	0/0		1.63	1467	0.00793	0.09953	0.031
1904247_Proteos_005.RAW	AF-M	Artificial Fingerprint	High	Sequest HT	Sequest HT (A2)	A	2	Unambiguous	MTLDDFR	mTLDDFR	M1(Oxidation)	1	1	P35527	P35527	Keratin, type I cytoskeletal 9 OS=Homo sapiens OX=9606 GN=KRT9 PE=1 SV=3	0	2	2	0.4545	0	1	1	1	457.208	913.408	913.408	0.04	2e-05	0	0	2.01586e+06	HCD	MS2	0	41.39	52.9743	16508	16508	16507	0/0		2.09	892	0.0007241	0.02097	0.269
1904247_Proteos_005.RAW	AF-M	Artificial Fingerprint	High	Sequest HT	Sequest HT (A2)	A	2	Unambiguous	DYQELMNVK	DYQELmNVK	M6(Oxidation)	1	4	P35908	Q5XKE5; P35908; Q01546; P12035	Keratin, type II cytoskeletal 79 OS=Homo sapiens OX=9606 GN=KRT79 PE=1 SV=2; Keratin, type II cytoskeletal 2 epidermal OS=Homo sapiens OX=9606 GN=KRT2 PE=1 SV=2; Keratin, type II cytoskeletal 2 oral OS=Homo sapiens OX=9606 GN=KRT76 PE=1 SV=2; Keratin, type II cytoskeletal 3 OS=Homo sapiens OX=9606 GN=KRT3 PE=1 SV=3	0	2	2	0.445	0	1	1	1	578.271	1155.54	1155.54	0.45	0.00026	0	0	673602	HCD	MS2	0	50	53.2002	16567	16567	16566	0/0		2.18	1758	0.001406	0.02859	0.222
1904247_Proteos_005.RAW	AF-M	Artificial Fingerprint	High	Sequest HT	Sequest HT (A2)	A	2	Unambiguous	RLLEGEDAHLSSQQASGQSYSSR	RLLEGEDAHLSSQQASGQSYSSR		1	1	P08779	P08779	Keratin, type I cytoskeletal 16 OS=Homo sapiens OX=9606 GN=KRT16 PE=1 SV=4	1	4	4	0.3477	0	1	1	1	627.305	2506.2	2506.19	2.19	0.00137	0	0	217802	HCD	MS2	0	50	53.3457	16614	16614	16613	0/0		3.02	7059	0.001406	0.02808	0.225
1904247_Proteos_005.RAW	AF-M	Artificial Fingerprint	High	Sequest HT	Sequest HT (A2)	A	2	Unambiguous	LAADDFR	LAADDFR		4	17	P02533; P13645; Q04695; P08779	Q14532; O76015; O76013; P02533; Q15323; Q7Z3Y7; P08727; Q2M2I5; Q14525; P13645; Q92764; P05783; P19012; P13646; Q04695; O76014; P08779	Keratin, type I cuticular Ha2 OS=Homo sapiens OX=9606 GN=KRT32 PE=2 SV=3; Keratin, type I cuticular Ha8 OS=Homo sapiens OX=9606 GN=KRT38 PE=1 SV=3; Keratin, type I cuticular Ha6 OS=Homo sapiens OX=9606 GN=KRT36 PE=2 SV=1; Keratin, type I cytoskeletal 14 OS=Homo sapiens OX=9606 GN=KRT14 PE=1 SV=4; Keratin, type I cuticular Ha1 OS=Homo sapiens OX=9606 GN=KRT31 PE=1 SV=3; Keratin, type I cytoskeleta…	0	2	2	0.0548	0	1	1	1	404.203	807.399	807.4	-0.25	-0.0001	0	0	127932	HCD	MS2	0	50	53.4946	16658	16658	16657	0/0		0.73	655	0.008659	0.1054	0.022
1904247_Proteos_005.RAW	AF-M	Artificial Fingerprint	High	Sequest HT	Sequest HT (A2)	A	2	Unambiguous	GGVEEGPTVLR	GGVEEGPTVLR		1	1	P05089	P05089	Arginase-1 OS=Homo sapiens OX=9606 GN=ARG1 PE=1 SV=2	0	2	2	0.4208	0	1	1	1	557.298	1113.59	1113.59	-1.51	-0.00084	0	0	477712	HCD	MS2	38.8145	50	53.5938	16688	16688	16686	0/0		2.21	631	0.002625	0.05369	0.127
1904247_Proteos_005.RAW	AF-M	Artificial Fingerprint	High	Sequest HT	Sequest HT (A2)	A	2	Unambiguous	APSTYGGGLSVSSSR	APSTYGGGLSVSSSR		1	1	P02533	P02533	Keratin, type I cytoskeletal 14 OS=Homo sapiens OX=9606 GN=KRT14 PE=1 SV=4	0	2	2	0.3333	0	1	1	1	713.352	1425.7	1425.7	0.5	0.00036	0	0	68207.8	HCD	MS2	0	50	53.6687	16707	16707	16706	0/0		1.26	2252	0.006305	0.08807	0.05
1904247_Proteos_005.RAW	AF-M	Artificial Fingerprint	High	Sequest HT	Sequest HT (A2)	A	2	Unambiguous	GGSGGSHGGGSGFGGESGGSYGGGEEASGSGGGYGGGSGK	GGSGGSHGGGSGFGGESGGSYGGGEEASGSGGGYGGGSGK		1	1	P35527	P35527	Keratin, type I cytoskeletal 9 OS=Homo sapiens OX=9606 GN=KRT9 PE=1 SV=3	0	3	3	0.4959	0	1	1	1	1075.1	3223.28	3223.28	-0.75	-0.00081	0	0	133051	HCD	MS2	3.62685	50	53.7935	16740	16740	16739	0/0		2.42	3820	0.0007241	0.02263	0.258
1904247_Proteos_005.RAW	AF-M	Artificial Fingerprint	High	Sequest HT	Sequest HT (A2)	A	2	Unambiguous	TNAENEFVTIKK	TnAENEFVTIKK	N2(Deamidated)	1	1	P04264	P04264	Keratin, type II cytoskeletal 1 OS=Homo sapiens OX=9606 GN=KRT1 PE=1 SV=6	1	3	3	0.1522	0	1	1	1	465.577	1394.72	1394.72	0.24	0.00011	0	0	372077	HCD	MS2	43.1622	50	53.8151	16746	16746	16743	0/0		1.84	1526	0.0007241	0.02065	0.272
1904247_Proteos_005.RAW	AF-M	Artificial Fingerprint	High	Sequest HT	Sequest HT (A2)	A	2	Unambiguous	NMQDMVEDYR	NmQDMVEDYR	M2(Oxidation)	1	1	P04264	P04264	Keratin, type II cytoskeletal 1 OS=Homo sapiens OX=9606 GN=KRT1 PE=1 SV=6	0	2	2	0.3891	0	1	1	1	658.766	1316.52	1316.52	0.02	1e-05	0	0	238270	HCD	MS2	0	50	53.8796	16764	16764	16763	0/0		2.21	1143	0	0.002375	0.597
1904247_Proteos_005.RAW	AF-M	Artificial Fingerprint	High	Sequest HT	Sequest HT (A2)	A	2	Unambiguous	QTVEADVNGLR	QTVEADVnGLR	N8(Deamidated)	1	1	P08779	P08779	Keratin, type I cytoskeletal 16 OS=Homo sapiens OX=9606 GN=KRT16 PE=1 SV=4	0	2	2	0.3185	0	1	1	1	601.803	1202.6	1202.6	-2.26	-0.00136	0	0	38023.2	HCD	MS2	0	50	53.881	16765	16765	16763	0/0		1.57	1363	0.0007241	0.005683	0.466
1904247_Proteos_005.RAW	AF-M	Artificial Fingerprint	High	Sequest HT	Sequest HT (A2)	A	2	Unambiguous	DLKDEIVR	DLKDEIVR		1	1	P15924	P15924	Desmoplakin OS=Homo sapiens OX=9606 GN=DSP PE=1 SV=3	1	2	2	0.1921	0	1	1	1	494.277	987.547	987.547	-0.01	-1e-05	0	0	317233	HCD	MS2	1.59626	50	53.938	16781	16781	16780	0/0		1.51	975	0.001797	0.03228	0.204
1904247_Proteos_005.RAW	AF-M	Artificial Fingerprint	High	Sequest HT	Sequest HT (A2)	A	2	Unambiguous	TNAENEFVTIKK	TnAENEFVTIKK	N2(Deamidated)	1	1	P04264	P04264	Keratin, type II cytoskeletal 1 OS=Homo sapiens OX=9606 GN=KRT1 PE=1 SV=6	1	2	2	0.1111	0	1	1	1	697.862	1394.72	1394.72	-0.23	-0.00016	0	0	422569	HCD	MS2	2.29057	50	53.9718	16793	16793	16792	0/0		2.97	1569	0.0007241	0.005873	0.461
1904247_Proteos_005.RAW	AF-M	Artificial Fingerprint	High	Sequest HT	Sequest HT (A2)	A	2	Unambiguous	MTLDDFR	mTLDDFR	M1(Oxidation)	1	1	P35527	P35527	Keratin, type I cytoskeletal 9 OS=Homo sapiens OX=9606 GN=KRT9 PE=1 SV=3	0	2	2	0.488	0	1	1	1	457.208	913.408	913.408	-0.02	-1e-05	0	0	1.30174e+06	HCD	MS2	0.617646	50	53.9801	16796	16796	16795	0/0		2.09	892	0.002625	0.05425	0.125
1904247_Proteos_005.RAW	AF-M	Artificial Fingerprint	High	Sequest HT	Sequest HT (A2)	A	2	Unambiguous	QFSSSYLSR	QFSSSYLSR		1	1	P35527	P35527	Keratin, type I cytoskeletal 9 OS=Homo sapiens OX=9606 GN=KRT9 PE=1 SV=3	0	2	2	0.4732	0	1	1	1	537.765	1074.52	1074.52	0.64	0.00035	0	0	14167784	HCD	MS2	0.139156	5.079	54.135	16842	16842	16841	0/0		2.24	1144	0.0007241	0.01738	0.298
1904247_Proteos_005.RAW	AF-M	Artificial Fingerprint	High	Sequest HT	Sequest HT (A2)	A	2	Unambiguous	SISISVAR	SISISVAR		1	1	P04264	P04264	Keratin, type II cytoskeletal 1 OS=Homo sapiens OX=9606 GN=KRT1 PE=1 SV=6	0	2	2	0.3403	0	1	1	1	416.748	832.489	832.489	-0.22	-9e-05	0	0	586010	HCD	MS2	14.9257	50	54.1886	16855	16855	16854	0/0		1.44	462	0.001797	0.04326	0.16
1904247_Proteos_005.RAW	AF-M	Artificial Fingerprint	High	Sequest HT	Sequest HT (A2)	A	2	Unambiguous	DYQELMNTK	DYQELmNTK	M6(Oxidation)	1	1	P04264	P04264	Keratin, type II cytoskeletal 1 OS=Homo sapiens OX=9606 GN=KRT1 PE=1 SV=6	0	2	2	0.3427	0	1	1	1	579.26	1157.51	1157.51	-1.04	-0.0006	0	0	218551	HCD	MS2	23.853	50	54.2041	16860	16860	16859	0/0		1.43	1246	0.002625	0.05081	0.135
1904247_Proteos_005.RAW	AF-M	Artificial Fingerprint	High	Sequest HT	Sequest HT (A2)	A	2	Unambiguous	LDQCPESPLQR	LDQcPESPLQR	C4(Carbamidomethyl)	1	1	Q5T749	Q5T749	Keratinocyte proline-rich protein OS=Homo sapiens OX=9606 GN=KPRP PE=1 SV=1	0	2	2	0.365	0	1	1	1	671.824	1342.64	1342.64	-1.06	-0.00071	0	0	92007.7	HCD	MS2	0	50	54.3256	16896	16896	16894	0/0		2	1869	0.0007241	0.01491	0.321
1904247_Proteos_005.RAW	AF-M	Artificial Fingerprint	High	Sequest HT	Sequest HT (A2)	A	2	Unambiguous	LDQCPESPLQR	LDQcPESPLQR	C4(Carbamidomethyl)	1	1	Q5T749	Q5T749	Keratinocyte proline-rich protein OS=Homo sapiens OX=9606 GN=KPRP PE=1 SV=1	0	2	2	0.2826	0	1	1	1	671.824	1342.64	1342.64	-0.24	-0.00016	0	0	175698	HCD	MS2	14.9882	50	54.396	16916	16916	16913	0/0		1.84	1906	0.004031	0.07404	0.077
1904247_Proteos_005.RAW	AF-M	Artificial Fingerprint	High	Sequest HT	Sequest HT (A2)	A	2	Unambiguous	SLVNLGGSK	SLVnLGGSK	N4(Deamidated)	1	1	P04264	P04264	Keratin, type II cytoskeletal 1 OS=Homo sapiens OX=9606 GN=KRT1 PE=1 SV=6	0	2	2	0.4324	0	1	1	1	438.244	875.481	875.483	-2.52	-0.0011	0	0	70297.7	HCD	MS2	41.8617	50	54.4635	16932	16932	16931	0/0		1.85	788	0.00493	0.08399	0.057
1904247_Proteos_005.RAW	AF-M	Artificial Fingerprint	High	Sequest HT	Sequest HT (A2)	A	2	Unambiguous	LAADDFR	LAADDFR		4	17	P02533; P13645; Q04695; P08779	Q14532; O76015; O76013; P02533; Q15323; Q7Z3Y7; P08727; Q2M2I5; Q14525; P13645; Q92764; P05783; P19012; P13646; Q04695; O76014; P08779	Keratin, type I cuticular Ha2 OS=Homo sapiens OX=9606 GN=KRT32 PE=2 SV=3; Keratin, type I cuticular Ha8 OS=Homo sapiens OX=9606 GN=KRT38 PE=1 SV=3; Keratin, type I cuticular Ha6 OS=Homo sapiens OX=9606 GN=KRT36 PE=2 SV=1; Keratin, type I cytoskeletal 14 OS=Homo sapiens OX=9606 GN=KRT14 PE=1 SV=4; Keratin, type I cuticular Ha1 OS=Homo sapiens OX=9606 GN=KRT31 PE=1 SV=3; Keratin, type I cytoskeleta…	0	2	2	0.1702	0	1	1	1	404.203	807.4	807.4	-0.03	-1e-05	0	0	84161.7	HCD	MS2	7.03436	50	54.4967	16940	16940	16939	0/0		0.94	655	0.00793	0.0994	0.031
1904247_Proteos_005.RAW	AF-M	Artificial Fingerprint	High	Sequest HT	Sequest HT (A2)	A	2	Selected	NMQDMVEDYR	NmQDmVEDYR	M2(Oxidation); M5(Oxidation)	1	1	P04264	P04264	Keratin, type II cytoskeletal 1 OS=Homo sapiens OX=9606 GN=KRT1 PE=1 SV=6	0	2	2	0.0467	0	1	1	1	666.763	1332.52	1332.52	-0.66	-0.00044	0	0	173601	HCD	MS2	0	50	54.7763	17024	17024	17023	0/0		1.07	1006	0.009708	0.1203	0.001
1904247_Proteos_005.RAW	AF-M	Artificial Fingerprint	High	Sequest HT	Sequest HT (A2)	A	2	Unambiguous	GGSGGSHGGGSGFGGESGGSYGGGEEASGSGGGYGGGSGK	GGSGGSHGGGSGFGGESGGSYGGGEEASGSGGGYGGGSGK		1	1	P35527	P35527	Keratin, type I cytoskeletal 9 OS=Homo sapiens OX=9606 GN=KRT9 PE=1 SV=3	0	3	3	0.6477	0	1	1	1	1075.1	3223.29	3223.28	1.07	0.00115	0	0	226391	HCD	MS2	0	50	54.7964	17032	17032	17031	0/0		4.4	4177	0	2.961e-05	1.256
1904247_Proteos_005.RAW	AF-M	Artificial Fingerprint	High	Sequest HT	Sequest HT (A2)	A	2	Unambiguous	TNAENEFVTIKK	TNAEnEFVTIKK	N5(Deamidated)	1	1	P04264	P04264	Keratin, type II cytoskeletal 1 OS=Homo sapiens OX=9606 GN=KRT1 PE=1 SV=6	1	3	3	0.1815	0	1	1	1	465.577	1394.72	1394.72	-0.02	-1e-05	0	0	9252366	HCD	MS2	1.45689	6.841	54.8196	17039	17039	17038	0/0		2.59	1566	0.0007241	0.006874	0.437
1904247_Proteos_005.RAW	AF-M	Artificial Fingerprint	High	Sequest HT	Sequest HT (A2)	A	2	Unambiguous	QLDSIVGER	QLDSIVGER		2	3	A0A0S2Z428; P13647	A0A0S2Z428; P48668; P13647	HCG2039812 OS=Homo sapiens (Human) OX=9606 GN=KRT6A hCG_2039812; Keratin, type II cytoskeletal 6C OS=Homo sapiens OX=9606 GN=KRT6C PE=1 SV=3; Keratin, type II cytoskeletal 5 OS=Homo sapiens OX=9606 GN=KRT5 PE=1 SV=3	0	2	2	0.1351	0	1	1	1	508.772	1016.54	1016.54	0.6	0.0003	0	0	1.3625e+06	HCD	MS2	0	50	54.8379	17046	17046	17045	0/0		2.22	1014	0.0007241	0.01913	0.283
1904247_Proteos_005.RAW	AF-M	Artificial Fingerprint	High	Sequest HT	Sequest HT (A2)	A	2	Unambiguous	NMQDMVEDYR	NMQDmVEDYR	M5(Oxidation)	1	1	P04264	P04264	Keratin, type II cytoskeletal 1 OS=Homo sapiens OX=9606 GN=KRT1 PE=1 SV=6	0	2	2	0.2874	0	1	1	1	658.766	1316.52	1316.52	0.2	0.00013	0	0	2.41443e+06	HCD	MS2	0	50	54.8871	17066	17066	17065	0/0		2.47	1147	0.0007241	0.02398	0.249
1904247_Proteos_005.RAW	AF-M	Artificial Fingerprint	High	Sequest HT	Sequest HT (A2)	A	2	Unambiguous	TNAENEFVTIKK	TNAEnEFVTIKK	N5(Deamidated)	1	1	P04264	P04264	Keratin, type II cytoskeletal 1 OS=Homo sapiens OX=9606 GN=KRT1 PE=1 SV=6	1	2	2	0.2392	0	1	1	1	697.862	1394.72	1394.72	0.03	2e-05	0	0	605860	HCD	MS2	0	50	54.9768	17097	17097	17096	0/0		3.01	1561	0	0.001687	0.648
1904247_Proteos_005.RAW	AF-M	Artificial Fingerprint	High	Sequest HT	Sequest HT (A2)	A	2	Unambiguous	MTLDDFR	mTLDDFR	M1(Oxidation)	1	1	P35527	P35527	Keratin, type I cytoskeletal 9 OS=Homo sapiens OX=9606 GN=KRT9 PE=1 SV=3	0	2	2	0.4433	0	1	1	1	457.208	913.408	913.408	0.11	5e-05	0	0	1.3166e+06	HCD	MS2	6.03418	50	54.9845	17100	17100	17099	0/0		2.03	973	0.0007241	0.01852	0.288
1904247_Proteos_005.RAW	AF-M	Artificial Fingerprint	High	Sequest HT	Sequest HT (A2)	A	2	Unambiguous	QFSSSYLSR	QFSSSYLSR		1	1	P35527	P35527	Keratin, type I cytoskeletal 9 OS=Homo sapiens OX=9606 GN=KRT9 PE=1 SV=3	0	2	2	0.2185	0	1	1	1	537.764	1074.52	1074.52	-0.26	-0.00014	0	0	130672	HCD	MS2	25.1215	50	55.1521	17150	17150	17149	0/0		1.51	1122	0.002625	0.0691	0.088
1904247_Proteos_005.RAW	AF-M	Artificial Fingerprint	High	Sequest HT	Sequest HT (A2)	A	2	Unambiguous	LENEIQTYR	LEnEIQTYR	N3(Deamidated)	1	1	P13645	P13645	Keratin, type I cytoskeletal 10 OS=Homo sapiens OX=9606 GN=KRT10 PE=1 SV=6	0	2	2	0.1475	0	1	1	1	583.787	1166.57	1166.57	-1.06	-0.00062	0	0	911263	HCD	MS2	34.5931	48.593	55.3151	17199	17199	17198	0/0		2.44	1245	0.0007241	0.01781	0.294
1904247_Proteos_005.RAW	AF-M	Artificial Fingerprint	High	Sequest HT	Sequest HT (A2)	A	2	Unambiguous	SLVNLGGSK	SLVnLGGSK	N4(Deamidated)	1	1	P04264	P04264	Keratin, type II cytoskeletal 1 OS=Homo sapiens OX=9606 GN=KRT1 PE=1 SV=6	0	2	2	0.3067	0	1	1	1	438.245	875.483	875.483	0.06	3e-05	0	0	686311	HCD	MS2	7.17045	50	55.4655	17242	17242	17241	0/0		1.5	731	0.001406	0.02913	0.22
1904247_Proteos_005.RAW	AF-M	Artificial Fingerprint	High	Sequest HT	Sequest HT (A2)	A	2	Unambiguous	TAAENDFVTLKK	TAAEnDFVTLKK	N5(Deamidated)	1	1	P35908	P35908	Keratin, type II cytoskeletal 2 epidermal OS=Homo sapiens OX=9606 GN=KRT2 PE=1 SV=2	1	2	2	0.4766	0	1	1	1	669.351	1337.69	1337.69	-0.34	-0.00023	0	0	384707	HCD	MS2	15.495	50	55.4934	17250	17250	17249	0/0		2.56	1373	0	0.001492	0.667
1904247_Proteos_005.RAW	AF-M	Artificial Fingerprint	High	Sequest HT	Sequest HT (A2)	A	2	Unambiguous	DVDNAYMIK	DVDNAYmIK	M7(Oxidation)	1	1	P35908	P35908	Keratin, type II cytoskeletal 2 epidermal OS=Homo sapiens OX=9606 GN=KRT2 PE=1 SV=2	0	2	2	0.3287	0	1	1	1	542.753	1084.5	1084.5	0.37	0.0002	0	0	389628	HCD	MS2	2.51662	50	55.6319	17293	17293	17292	0/0		1.43	1402	0.002625	0.05214	0.131
1904247_Proteos_005.RAW	AF-M	Artificial Fingerprint	High	Sequest HT	Sequest HT (A2)	A	2	Unambiguous	VQALEEANNDLENK	VQALEEANNDLENK		1	1	P35527	P35527	Keratin, type I cytoskeletal 9 OS=Homo sapiens OX=9606 GN=KRT9 PE=1 SV=3	0	2	2	0.498	0	1	1	1	793.886	1586.77	1586.77	-0.22	-0.00017	0	0	200715	HCD	MS2	4.03688	50	55.6847	17309	17309	17308	0/0		2.53	2774	0	0.002248	0.605
1904247_Proteos_005.RAW	AF-M	Artificial Fingerprint	High	Sequest HT	Sequest HT (A2)	A	2	Unambiguous	IKFEMEQNLR	IKFEmEQNLR	M5(Oxidation)	1	1	P35527	P35527	Keratin, type I cytoskeletal 9 OS=Homo sapiens OX=9606 GN=KRT9 PE=1 SV=3	1	3	3	0.199	0	1	1	1	441.896	1323.67	1323.67	0.12	5e-05	0	0	824864	HCD	MS2	7.82146	50	55.7772	17340	17340	17339	0/0		1.96	1466	0.001797	0.04612	0.15
1904247_Proteos_005.RAW	AF-M	Artificial Fingerprint	High	Sequest HT	Sequest HT (A2)	A	2	Unambiguous	LLRDYQELMNTK	LLRDYQELmNTK	M9(Oxidation)	1	1	P04264	P04264	Keratin, type II cytoskeletal 1 OS=Homo sapiens OX=9606 GN=KRT1 PE=1 SV=6	1	3	3	0.2	0	1	1	1	513.933	1539.78	1539.78	0.07	4e-05	0	0	211661	HCD	MS2	21.2876	50	55.7938	17346	17346	17345	0/0		1.75	1940	0.0007241	0.02256	0.258
1904247_Proteos_005.RAW	AF-M	Artificial Fingerprint	High	Sequest HT	Sequest HT (A2)	A	2	Unambiguous	GGSGGSHGGGSGFGGESGGSYGGGEEASGSGGGYGGGSGK	GGSGGSHGGGSGFGGESGGSYGGGEEASGSGGGYGGGSGK		1	1	P35527	P35527	Keratin, type I cytoskeletal 9 OS=Homo sapiens OX=9606 GN=KRT9 PE=1 SV=3	0	3	3	0.6424	0	1	1	1	1075.1	3223.28	3223.28	-0.64	-0.00069	0	0	214912	HCD	MS2	0	50	55.8041	17351	17351	17350	0/0		4.53	3847	0	8.322e-05	1.1
1904247_Proteos_005.RAW	AF-M	Artificial Fingerprint	High	Sequest HT	Sequest HT (A2)	A	2	Unambiguous	TNAENEFVTIKK	TnAEnEFVTIKK	N2(Deamidated); N5(Deamidated)	1	1	P04264	P04264	Keratin, type II cytoskeletal 1 OS=Homo sapiens OX=9606 GN=KRT1 PE=1 SV=6	1	3	3	0.3657	0	1	1	1	465.904	1395.7	1395.7	-1.34	-0.00062	0	0	326440	HCD	MS2	41.6067	50	55.8244	17357	17357	17356	0/0		2.16	1997	0.001797	0.03556	0.189
1904247_Proteos_005.RAW	AF-M	Artificial Fingerprint	High	Sequest HT	Sequest HT (A2)	A	2	Unambiguous	QLDSIVGER	QLDSIVGER		2	3	A0A0S2Z428; P13647	A0A0S2Z428; P48668; P13647	HCG2039812 OS=Homo sapiens (Human) OX=9606 GN=KRT6A hCG_2039812; Keratin, type II cytoskeletal 6C OS=Homo sapiens OX=9606 GN=KRT6C PE=1 SV=3; Keratin, type II cytoskeletal 5 OS=Homo sapiens OX=9606 GN=KRT5 PE=1 SV=3	0	2	2	0.1405	0	1	1	1	508.772	1016.54	1016.54	0.54	0.00027	0	0	196470	HCD	MS2	6.50741	50	55.8396	17362	17362	17361	0/0		1.85	1014	0.001797	0.04706	0.147
1904247_Proteos_005.RAW	AF-M	Artificial Fingerprint	High	Sequest HT	Sequest HT (A2)	A	2	Unambiguous	MTLDDFR	mTLDDFR	M1(Oxidation)	1	1	P35527	P35527	Keratin, type I cytoskeletal 9 OS=Homo sapiens OX=9606 GN=KRT9 PE=1 SV=3	0	2	2	0.4787	0	1	1	1	457.208	913.408	913.408	-0.42	-0.00019	0	0	647967	HCD	MS2	0.99822	50	55.9865	17404	17404	17403	0/0		1.88	999	0.0007241	0.01866	0.287
1904247_Proteos_005.RAW	AF-M	Artificial Fingerprint	High	Sequest HT	Sequest HT (A2)	A	2	Unambiguous	VIPELNGK	VIPELnGK	N6(Deamidated)	1	1	P04406	P04406	Glyceraldehyde-3-phosphate dehydrogenase OS=Homo sapiens OX=9606 GN=GAPDH PE=1 SV=3	0	2	2	0.3917	0	1	1	1	435.75	870.493	870.493	0.12	5e-05	0	0	558491	HCD	MS2	4.39908	50	56.0021	17409	17409	17408	0/0		1.2	271	0.002625	0.06411	0.099
1904247_Proteos_005.RAW	AF-M	Artificial Fingerprint	High	Sequest HT	Sequest HT (A2)	A	2	Unambiguous	NMQDMVEDYR	NMQDmVEDYR	M5(Oxidation)	1	1	P04264	P04264	Keratin, type II cytoskeletal 1 OS=Homo sapiens OX=9606 GN=KRT1 PE=1 SV=6	0	2	2	0.3137	0	1	1	1	658.765	1316.52	1316.52	-0.82	-0.00054	0	0	565243	HCD	MS2	5.51711	50	56.0313	17418	17418	17417	0/0		2.04	1099	0.0007241	0.009688	0.386
1904247_Proteos_005.RAW	AF-M	Artificial Fingerprint	High	Sequest HT	Sequest HT (A2)	A	2	Unambiguous	QTVEADVNGLR	QTVEADVNGLR		1	1	P08779	P08779	Keratin, type I cytoskeletal 16 OS=Homo sapiens OX=9606 GN=KRT16 PE=1 SV=4	0	2	2	0.3	0	1	1	1	601.312	1201.62	1201.62	-0.23	-0.00014	0	0	102226	HCD	MS2	0	50	56.2024	17470	17470	17469	0/0		1.9	1228	0.0007241	0.006981	0.435
1904247_Proteos_005.RAW	AF-M	Artificial Fingerprint	High	Sequest HT	Sequest HT (A2)	A	2	Unambiguous	LTTYPQTTIR	LTTYPQTTIR		1	1	Q8WVV4	Q8WVV4	Protein POF1B OS=Homo sapiens OX=9606 GN=POF1B PE=1 SV=3	0	2	2	0.2868	0	1	1	1	597.33	1193.65	1193.65	0.66	0.00039	0	0	54931.7	HCD	MS2	28.5451	50	56.5499	17568	17568	17565	0/0		1.29	608	0.002625	0.05624	0.119
1904247_Proteos_005.RAW	AF-M	Artificial Fingerprint	High	Sequest HT	Sequest HT (A2)	A	2	Unambiguous	DVDNAYMIK	DVDNAYmIK	M7(Oxidation)	1	1	P35908	P35908	Keratin, type II cytoskeletal 2 epidermal OS=Homo sapiens OX=9606 GN=KRT2 PE=1 SV=2	0	2	2	0.3036	0	1	1	1	542.753	1084.5	1084.5	0.03	2e-05	0	0	288680	HCD	MS2	7.12031	50	56.6365	17593	17593	17592	0/0		1.12	1409	0.005861	0.08606	0.054
1904247_Proteos_005.RAW	AF-M	Artificial Fingerprint	High	Sequest HT	Sequest HT (A2)	A	2	Unambiguous	RTNAENEFVTIK	RTnAENEFVTIK	N3(Deamidated)	1	1	P04264	P04264	Keratin, type II cytoskeletal 1 OS=Homo sapiens OX=9606 GN=KRT1 PE=1 SV=6	1	3	3	0.267	0	1	1	1	474.912	1422.72	1422.72	-0.14	-6e-05	0	0	68439.5	HCD	MS2	37.0121	50	56.7694	17629	17629	17627	0/0		1.76	1777	0.002625	0.05924	0.112
1904247_Proteos_005.RAW	AF-M	Artificial Fingerprint	High	Sequest HT	Sequest HT (A2)	A	2	Unambiguous	IKFEMEQNLR	IKFEmEQNLR	M5(Oxidation)	1	1	P35527	P35527	Keratin, type I cytoskeletal 9 OS=Homo sapiens OX=9606 GN=KRT9 PE=1 SV=3	1	3	3	0.3568	0	1	1	1	441.896	1323.67	1323.67	0.26	0.00011	0	0	805888	HCD	MS2	2.25192	50	56.7834	17633	17633	17632	0/0		2.13	1467	0.001797	0.03954	0.173
1904247_Proteos_005.RAW	AF-M	Artificial Fingerprint	High	Sequest HT	Sequest HT (A2)	A	2	Unambiguous	LLRDYQELMNTK	LLRDYQELmNTK	M9(Oxidation)	1	1	P04264	P04264	Keratin, type II cytoskeletal 1 OS=Homo sapiens OX=9606 GN=KRT1 PE=1 SV=6	1	3	3	0.0884	0	1	1	1	513.933	1539.78	1539.78	0.55	0.00028	0	0	373166	HCD	MS2	9.15632	50	56.8095	17643	17643	17642	0/0		1.81	1940	0.008659	0.1049	0.022
1904247_Proteos_005.RAW	AF-M	Artificial Fingerprint	High	Sequest HT	Sequest HT (A2)	A	2	Unambiguous	GGSGGSHGGGSGFGGESGGSYGGGEEASGSGGGYGGGSGK	GGSGGSHGGGSGFGGESGGSYGGGEEASGSGGGYGGGSGK		1	1	P35527	P35527	Keratin, type I cytoskeletal 9 OS=Homo sapiens OX=9606 GN=KRT9 PE=1 SV=3	0	3	3	0.6826	0	1	1	1	1075.1	3223.28	3223.28	0.16	0.00017	0	0	249931	HCD	MS2	0	50	56.8122	17645	17645	17642	0/0		6.05	3967	0	3.704e-06	1.568
1904247_Proteos_005.RAW	AF-M	Artificial Fingerprint	High	Sequest HT	Sequest HT (A2)	A	2	Unambiguous	ALEESNYELEGK	ALEESNYELEGK		1	1	P13645	P13645	Keratin, type I cytoskeletal 10 OS=Homo sapiens OX=9606 GN=KRT10 PE=1 SV=6	0	2	2	0.5	0	1	1	1	691.327	1381.65	1381.65	-1.27	-0.00088	0	0	182738	HCD	MS2	3.30302	50	56.8599	17658	17658	17657	0/0		1.84	2037	0.0007241	0.01638	0.307
1904247_Proteos_005.RAW	AF-M	Artificial Fingerprint	High	Sequest HT	Sequest HT (A2)	A	2	Unambiguous	LTYEIEDEK	LTYEIEDEK		1	1	P15924	P15924	Desmoplakin OS=Homo sapiens OX=9606 GN=DSP PE=1 SV=3	0	2	2	0.3041	0	1	1	1	570.277	1139.55	1139.55	-0.52	-0.0003	0	0	135457	HCD	MS2	45.8545	50	56.9451	17686	17686	17683	0/0		1.48	1343	0.001797	0.03297	0.201
1904247_Proteos_005.RAW	AF-M	Artificial Fingerprint	High	Sequest HT	Sequest HT (A2)	A	2	Unambiguous	MTLDDFR	mTLDDFR	M1(Oxidation)	1	1	P35527	P35527	Keratin, type I cytoskeletal 9 OS=Homo sapiens OX=9606 GN=KRT9 PE=1 SV=3	0	2	2	0.4819	0	1	1	1	457.208	913.408	913.408	0.04	2e-05	0	0	545967	HCD	MS2	18.9093	50	56.9899	17702	17702	17701	0/0		1.93	892	0.0007241	0.01447	0.325
1904247_Proteos_005.RAW	AF-M	Artificial Fingerprint	High	Sequest HT	Sequest HT (A2)	A	2	Unambiguous	NMQDMVEDYR	NMQDmVEDYR	M5(Oxidation)	1	1	P04264	P04264	Keratin, type II cytoskeletal 1 OS=Homo sapiens OX=9606 GN=KRT1 PE=1 SV=6	0	2	2	0.3793	0	1	1	1	658.766	1316.52	1316.52	0.29	0.00019	0	0	15933644	HCD	MS2	0.336086	9.25	57.0349	17720	17720	17719	0/0		2.32	1126	0.002625	0.0526	0.13
1904247_Proteos_005.RAW	AF-M	Artificial Fingerprint	High	Sequest HT	Sequest HT (A2)	A	2	Unambiguous	NMQDMVEDYR	NmQDmVEDYR	M2(Oxidation); M5(Oxidation)	1	1	P04264	P04264	Keratin, type II cytoskeletal 1 OS=Homo sapiens OX=9606 GN=KRT1 PE=1 SV=6	0	2	2	0.3218	0	1	1	1	666.762	1332.52	1332.52	-1.66	-0.00111	0	0	281163	HCD	MS2	15.1479	50	57.1039	17748	17748	17747	0/0		2.02	985	0.0007241	0.01093	0.367
1904247_Proteos_005.RAW	AF-M	Artificial Fingerprint	High	Sequest HT	Sequest HT (A2)	A	2	Unambiguous	SGFSSISVSR	SGFSSISVSR		1	2	P04259	P04259; P48668	Keratin, type II cytoskeletal 6B OS=Homo sapiens OX=9606 GN=KRT6B PE=1 SV=5; Keratin, type II cytoskeletal 6C OS=Homo sapiens OX=9606 GN=KRT6C PE=1 SV=3	0	2	2	0.5045	0	1	1	1	513.764	1026.52	1026.52	0.2	0.0001	0	0	1.66219e+06	HCD	MS2	9.12565	50	57.1381	17765	17765	17763	0/0		2.24	894	0.0007241	0.02684	0.232
1904247_Proteos_005.RAW	AF-M	Artificial Fingerprint	High	Sequest HT	Sequest HT (A2)	A	2	Unambiguous	LKYENEVALR	LKYEnEVALR	N5(Deamidated)	1	1	P13645	P13645	Keratin, type I cytoskeletal 10 OS=Homo sapiens OX=9606 GN=KRT10 PE=1 SV=6	1	3	3	0.3213	0	1	1	1	412.559	1235.66	1235.66	-0.35	-0.00014	0	0	1.21793e+06	HCD	MS2	0.970928	50	57.2393	17805	17805	17804	0/0		2.21	865	0.00493	0.08363	0.058
1904247_Proteos_005.RAW	AF-M	Artificial Fingerprint	High	Sequest HT	Sequest HT (A2)	A	2	Unambiguous	DVDNAYMIK	DVDNAYmIK	M7(Oxidation)	1	1	P35908	P35908	Keratin, type II cytoskeletal 2 epidermal OS=Homo sapiens OX=9606 GN=KRT2 PE=1 SV=2	0	2	2	0.4404	0	1	1	1	542.753	1084.5	1084.5	1.61	0.00087	0	0	330034	HCD	MS2	12.6257	50	57.6465	17924	17924	17923	0/0		1.09	1395	0.008659	0.1052	0.022
1904247_Proteos_005.RAW	AF-M	Artificial Fingerprint	High	Sequest HT	Sequest HT (A2)	A	2	Unambiguous	VQALEEANNDLENK	VQALEEANnDLENK	N9(Deamidated)	1	1	P35527	P35527	Keratin, type I cytoskeletal 9 OS=Homo sapiens OX=9606 GN=KRT9 PE=1 SV=3	0	2	2	0.0543	0	1	1	1	794.379	1587.75	1587.75	0.16	0.00013	0	0	8645340	HCD	MS2	2.09021	15.277	57.695	17936	17936	17935	0/0		3.5	2939	0	0.001074	0.716
1904247_Proteos_005.RAW	AF-M	Artificial Fingerprint	High	Sequest HT	Sequest HT (A2)	A	2	Unambiguous	GGSGGSHGGGSGFGGESGGSYGGGEEASGSGGGYGGGSGK	GGSGGSHGGGSGFGGESGGSYGGGEEASGSGGGYGGGSGK		1	1	P35527	P35527	Keratin, type I cytoskeletal 9 OS=Homo sapiens OX=9606 GN=KRT9 PE=1 SV=3	0	3	3	0.6014	0	1	1	1	1075.1	3223.29	3223.28	2.32	0.00249	0	0	316364	HCD	MS2	0	50	57.826	17976	17976	17975	0/0		4.44	4312	0	1.773e-05	1.333
1904247_Proteos_005.RAW	AF-M	Artificial Fingerprint	High	Sequest HT	Sequest HT (A2)	A	2	Unambiguous	ALEESNYELEGK	ALEESNYELEGK		1	1	P13645	P13645	Keratin, type I cytoskeletal 10 OS=Homo sapiens OX=9606 GN=KRT10 PE=1 SV=6	0	2	2	0.5623	0	1	1	1	691.328	1381.65	1381.65	0.14	0.0001	0	0	3.45167e+06	HCD	MS2	0	33.311	57.8642	17986	17986	17985	0/0		2.81	1990	0	0.002959	0.564
1904247_Proteos_005.RAW	AF-M	Artificial Fingerprint	High	Sequest HT	Sequest HT (A2)	A	2	Unambiguous	MTLDDFR	mTLDDFR	M1(Oxidation)	1	1	P35527	P35527	Keratin, type I cytoskeletal 9 OS=Homo sapiens OX=9606 GN=KRT9 PE=1 SV=3	0	2	2	0.4817	0	1	1	1	457.208	913.41	913.408	1.38	0.00063	0	0	381589	HCD	MS2	21.929	50	58.006	18032	18032	18031	0/0		1.91	939	0.001797	0.02932	0.219
1904247_Proteos_005.RAW	AF-M	Artificial Fingerprint	High	Sequest HT	Sequest HT (A2)	A	2	Unambiguous	NMQDMVEDYR	NMQDmVEDYR	M5(Oxidation)	1	1	P04264	P04264	Keratin, type II cytoskeletal 1 OS=Homo sapiens OX=9606 GN=KRT1 PE=1 SV=6	0	2	2	0.2637	0	1	1	1	658.766	1316.53	1316.52	0.48	0.00032	0	0	800289	HCD	MS2	0	50	58.0453	18044	18044	18043	0/0		2.01	1128	0.0007241	0.005957	0.459
1904247_Proteos_005.RAW	AF-M	Artificial Fingerprint	High	Sequest HT	Sequest HT (A2)	A	2	Unambiguous	LKYENEVALR	LKYEnEVALR	N5(Deamidated)	1	1	P13645	P13645	Keratin, type I cytoskeletal 10 OS=Homo sapiens OX=9606 GN=KRT10 PE=1 SV=6	1	2	2	0.4933	0	1	1	1	618.336	1235.66	1235.66	0.78	0.00048	0	0	460367	HCD	MS2	43.6615	50	58.0533	18046	18046	18045	0/0		2.23	846	0.0007241	0.009468	0.389
1904247_Proteos_005.RAW	AF-M	Artificial Fingerprint	High	Sequest HT	Sequest HT (A2)	A	2	Unambiguous	FEMEQNLR	FEMEQNLR		1	1	P35527	P35527	Keratin, type I cytoskeletal 9 OS=Homo sapiens OX=9606 GN=KRT9 PE=1 SV=3	0	2	2	0.1955	0	1	1	1	533.753	1066.5	1066.5	0.78	0.00042	0	0	14565328	HCD	MS2	0	11.06	58.2029	18099	18099	18098	0/0		2.2	1118	0.004515	0.07914	0.067
1904247_Proteos_005.RAW	AF-M	Artificial Fingerprint	High	Sequest HT	Sequest HT (A2)	A	2	Unambiguous	LKYENEVALR	LKYEnEVALR	N5(Deamidated)	1	1	P13645	P13645	Keratin, type I cytoskeletal 10 OS=Homo sapiens OX=9606 GN=KRT10 PE=1 SV=6	1	3	3	0.2961	0	1	1	1	412.559	1235.66	1235.66	0.32	0.00013	0	0	4377102	HCD	MS2	0.971299	14.419	58.2428	18114	18114	18113	0/0		2.33	822	0.0007241	0.01214	0.352
1904247_Proteos_005.RAW	AF-M	Artificial Fingerprint	High	Sequest HT	Sequest HT (A2)	A	2	Unambiguous	VQALEEANNDLENK	VQALEEANnDLENK	N9(Deamidated)	1	1	P35527	P35527	Keratin, type I cytoskeletal 9 OS=Homo sapiens OX=9606 GN=KRT9 PE=1 SV=3	0	2	2	0.0424	0	1	1	1	794.378	1587.75	1587.75	-0.07	-6e-05	0	0	1258344	HCD	MS2	3.5824	50	58.7015	18259	18259	18258	0/0		3.54	2973	0	0.0003274	0.895
1904247_Proteos_005.RAW	AF-M	Artificial Fingerprint	High	Sequest HT	Sequest HT (A2)	A	2	Unambiguous	VQALEEANNDLENK	VQALEEAnNDLENK	N8(Deamidated)	1	1	P35527	P35527	Keratin, type I cytoskeletal 9 OS=Homo sapiens OX=9606 GN=KRT9 PE=1 SV=3	0	2	2		0.0424	2	2	2	794.378	1587.75	1587.75	-0.07	-6e-05	0	0	1258344	HCD	MS2	3.5824	50	58.7015	18259	18259	18258	0/0		3.39	2973	0	0.000376	0.874
1904247_Proteos_005.RAW	AF-M	Artificial Fingerprint	High	Sequest HT	Sequest HT (A2)	A	2	Unambiguous	GGSGGSHGGGSGFGGESGGSYGGGEEASGSGGGYGGGSGK	GGSGGSHGGGSGFGGESGGSYGGGEEASGSGGGYGGGSGK		1	1	P35527	P35527	Keratin, type I cytoskeletal 9 OS=Homo sapiens OX=9606 GN=KRT9 PE=1 SV=3	0	3	3	0.5777	0	1	1	1	1075.1	3223.28	3223.28	-0.52	-0.00056	0	0	184875	HCD	MS2	0	50	58.8303	18299	18299	18298	0/0		4.12	3877	0	0.000396	0.866
1904247_Proteos_005.RAW	AF-M	Artificial Fingerprint	High	Sequest HT	Sequest HT (A2)	A	2	Unambiguous	ALEESNYELEGK	ALEESNYELEGK		1	1	P13645	P13645	Keratin, type I cytoskeletal 10 OS=Homo sapiens OX=9606 GN=KRT10 PE=1 SV=6	0	2	2	0.5451	0	1	1	1	691.328	1381.65	1381.65	-0.03	-2e-05	0	0	471835	HCD	MS2	0	50	58.8703	18309	18309	18308	0/0		2.77	2008	0	0.002103	0.615
1904247_Proteos_005.RAW	AF-M	Artificial Fingerprint	High	Sequest HT	Sequest HT (A2)	A	2	Unambiguous	MTLDDFR	mTLDDFR	M1(Oxidation)	1	1	P35527	P35527	Keratin, type I cytoskeletal 9 OS=Homo sapiens OX=9606 GN=KRT9 PE=1 SV=3	0	2	2	0.3425	0	1	1	1	457.208	913.408	913.408	-0.09	-4e-05	0	0	309506	HCD	MS2	0	50	59.0102	18355	18355	18354	0/0		1.46	892	0.002625	0.05068	0.135
1904247_Proteos_005.RAW	AF-M	Artificial Fingerprint	High	Sequest HT	Sequest HT (A2)	A	2	Unambiguous	KQISNLQQSISDAEQR	KQISNLQQSISDAEQR		1	1	P04264	P04264	Keratin, type II cytoskeletal 1 OS=Homo sapiens OX=9606 GN=KRT1 PE=1 SV=6	1	3	3	0.5424	0	1	1	1	615.654	1844.95	1844.95	0.43	0.00026	0	0	289223	HCD	MS2	24.2575	50	59.0411	18365	18365	18363	0/0		2.71	2380	0.0007241	0.01925	0.282
1904247_Proteos_005.RAW	AF-M	Artificial Fingerprint	High	Sequest HT	Sequest HT (A2)	A	2	Unambiguous	NMQDMVEDYR	NMQDmVEDYR	M5(Oxidation)	1	1	P04264	P04264	Keratin, type II cytoskeletal 1 OS=Homo sapiens OX=9606 GN=KRT1 PE=1 SV=6	0	2	2	0.2222	0	1	1	1	658.766	1316.53	1316.52	0.57	0.00038	0	0	203533	HCD	MS2	7.23379	50	59.0537	18368	18368	18367	0/0		1.53	1128	0.0054	0.0849	0.056
1904247_Proteos_005.RAW	AF-M	Artificial Fingerprint	High	Sequest HT	Sequest HT (A2)	A	2	Unambiguous	KQISNLQQSISDAEQR	KQISNLQQSISDAEQR		1	1	P04264	P04264	Keratin, type II cytoskeletal 1 OS=Homo sapiens OX=9606 GN=KRT1 PE=1 SV=6	1	2	2	0.4933	0	1	1	1	922.977	1844.95	1844.95	-0.06	-5e-05	0	0	42046.9	HCD	MS2	22.1951	50	59.1734	18406	18406	18404	0/0		1.5	2426	0.004031	0.07385	0.077
1904247_Proteos_005.RAW	AF-M	Artificial Fingerprint	High	Sequest HT	Sequest HT (A2)	A	2	Selected	LKYENEVALR	LKYEnEVALR	N5(Deamidated)	1	1	P13645	P13645	Keratin, type I cytoskeletal 10 OS=Homo sapiens OX=9606 GN=KRT10 PE=1 SV=6	1	3	3	0.0179	0	1	1	2	412.559	1235.66	1235.66	-1.38	-0.00057	0	0	217141	HCD	MS2	10.8899	50	59.2462	18431	18431	18430	0/0		1.12	948	0.003126	0.06931	0.087
1904247_Proteos_005.RAW	AF-M	Artificial Fingerprint	High	Sequest HT	Sequest HT (A2)	A	2	Unambiguous	FEMEQNLR	FEMEQNLR		1	1	P35527	P35527	Keratin, type I cytoskeletal 9 OS=Homo sapiens OX=9606 GN=KRT9 PE=1 SV=3	0	2	2	0.3801	0	1	1	1	533.753	1066.5	1066.5	-0.82	-0.00044	0	0	406093	HCD	MS2	35.7725	50	59.3787	18474	18474	18473	0/0		1.71	1081	0.0007241	0.01989	0.277
1904247_Proteos_005.RAW	AF-M	Artificial Fingerprint	High	Sequest HT	Sequest HT (A2)	A	2	Unambiguous	VQALEEANNDLENK	VQALEEAnNDLENK	N8(Deamidated)	1	1	P35527	P35527	Keratin, type I cytoskeletal 9 OS=Homo sapiens OX=9606 GN=KRT9 PE=1 SV=3	0	2	2	0.0202	0	1	1	1	794.378	1587.75	1587.75	-0.53	-0.00042	0	0	7.78414e+06	HCD	MS2	0.903632	17.248	59.7045	18584	18584	18583	0/0		3.47	2984	0	0.002021	0.621
1904247_Proteos_005.RAW	AF-M	Artificial Fingerprint	High	Sequest HT	Sequest HT (A2)	A	2	Unambiguous	VQALEEANNDLENK	VQALEEANnDLENK	N9(Deamidated)	1	1	P35527	P35527	Keratin, type I cytoskeletal 9 OS=Homo sapiens OX=9606 GN=KRT9 PE=1 SV=3	0	2	2		0.0202	2	2	2	794.378	1587.75	1587.75	-0.53	-0.00042	0	0	7.78414e+06	HCD	MS2	0.903632	17.248	59.7045	18584	18584	18583	0/0		3.4	2984	0	0.002247	0.605
1904247_Proteos_005.RAW	AF-M	Artificial Fingerprint	High	Sequest HT	Sequest HT (A2)	A	2	Unambiguous	STLFVPR	STLFVPR		1	1	P12955	P12955	Xaa-Pro dipeptidase OS=Homo sapiens OX=9606 GN=PEPD PE=1 SV=3	0	2	2	0.4034	0	1	1	1	410.24	819.472	819.472	-0.05	-2e-05	0	0	93718.5	HCD	MS2	41.327	50	59.8039	18620	18620	18617	0/0		1.19	386	0.002625	0.05522	0.122
1904247_Proteos_005.RAW	AF-M	Artificial Fingerprint	High	Sequest HT	Sequest HT (A2)	A	2	Unambiguous	GGSGGSHGGGSGFGGESGGSYGGGEEASGSGGGYGGGSGK	GGSGGSHGGGSGFGGESGGSYGGGEEASGSGGGYGGGSGK		1	1	P35527	P35527	Keratin, type I cytoskeletal 9 OS=Homo sapiens OX=9606 GN=KRT9 PE=1 SV=3	0	3	3	0.5865	0	1	1	1	1075.1	3223.28	3223.28	-0.52	-0.00056	0	0	229793	HCD	MS2	0	50	59.8366	18631	18631	18630	0/0		3.99	3877	0	7.808e-05	1.11
1904247_Proteos_005.RAW	AF-M	Artificial Fingerprint	High	Sequest HT	Sequest HT (A2)	A	2	Unambiguous	QEYEQLIAK	QEYEQLIAK		1	1	P35527	P35527	Keratin, type I cytoskeletal 9 OS=Homo sapiens OX=9606 GN=KRT9 PE=1 SV=3	0	2	2	0.4814	0	1	1	1	561.296	1121.58	1121.58	0.94	0.00052	0	0	34672844	HCD	MS2	0.754057	5.088	59.8378	18632	18632	18630	0/0		2.95	945	0.001797	0.04298	0.161
1904247_Proteos_005.RAW	AF-M	Artificial Fingerprint	High	Sequest HT	Sequest HT (A2)	A	2	Unambiguous	ALEESNYELEGK	ALEESNYELEGK		1	1	P13645	P13645	Keratin, type I cytoskeletal 10 OS=Homo sapiens OX=9606 GN=KRT10 PE=1 SV=6	0	2	2	0.4615	0	1	1	1	691.328	1381.65	1381.65	1.03	0.00071	0	0	258110	HCD	MS2	22.4883	50	59.8786	18649	18649	18648	0/0		1.82	1985	0.0007241	0.02703	0.231
1904247_Proteos_005.RAW	AF-M	Artificial Fingerprint	High	Sequest HT	Sequest HT (A2)	A	2	Unambiguous	MTLDDFR	mTLDDFR	M1(Oxidation)	1	1	P35527	P35527	Keratin, type I cytoskeletal 9 OS=Homo sapiens OX=9606 GN=KRT9 PE=1 SV=3	0	2	2	0.4696	0	1	1	1	457.208	913.409	913.408	0.71	0.00033	0	0	264818	HCD	MS2	13.6094	50	60.0147	18705	18705	18704	0/0		1.81	976	0.0007241	0.007757	0.419
1904247_Proteos_005.RAW	AF-M	Artificial Fingerprint	High	Sequest HT	Sequest HT (A2)	A	2	Unambiguous	NMQDMVEDYR	NMQDmVEDYR	M5(Oxidation)	1	1	P04264	P04264	Keratin, type II cytoskeletal 1 OS=Homo sapiens OX=9606 GN=KRT1 PE=1 SV=6	0	2	2	0.3188	0	1	1	1	658.767	1316.53	1316.52	0.94	0.00062	0	0	323472	HCD	MS2	0	50	60.06	18723	18723	18722	0/0		1.6	1120	0.001797	0.03329	0.199
1904247_Proteos_005.RAW	AF-M	Artificial Fingerprint	High	Sequest HT	Sequest HT (A2)	A	2	Unambiguous	TNAENEFVTIKK	TnAENEFVTIKK	N2(Deamidated)	1	1	P04264	P04264	Keratin, type II cytoskeletal 1 OS=Homo sapiens OX=9606 GN=KRT1 PE=1 SV=6	1	3	3	0.1272	0	1	1	1	465.577	1394.72	1394.72	0.18	8e-05	0	0	13674530	HCD	MS2	0.302951	5.111	60.2316	18784	18784	18783	0/0		2.83	1529	0.0007241	0.01697	0.301
1904247_Proteos_005.RAW	AF-M	Artificial Fingerprint	High	Sequest HT	Sequest HT (A2)	A	2	Selected	GGSGGSYGGGSGSGGGSGGGYGGGSGGGHSGGSGGGHSGGSGGNYGGGSGSGGGSGGGYGGGSGSR	GGSGGSYGGGSGSGGGSGGGYGGGSGGGHSGGSGGGHSGGSGGNYGGGSGSGGGSGGGYGGGSGSR		1	1	P35527	P35527	Keratin, type I cytoskeletal 9 OS=Homo sapiens OX=9606 GN=KRT9 PE=1 SV=3	0	4	4	0.0162	0	1	1	1	1243.99	4972.93	4972.94	-1.71	-0.00213	0	0	42257.5	HCD	MS2	0	50	60.2598	18794	18794	18792	0/0		1.85	1586	0.002625	0.06104	0.107
1904247_Proteos_005.RAW	AF-M	Artificial Fingerprint	High	Sequest HT	Sequest HT (A2)	A	2	Unambiguous	QFSSSYLSR	QFSSSYLSR		1	1	P35527	P35527	Keratin, type I cytoskeletal 9 OS=Homo sapiens OX=9606 GN=KRT9 PE=1 SV=3	0	2	2	0.2919	0	1	1	1	537.763	1074.52	1074.52	-2.76	-0.00148	0	0	159518	HCD	MS2	40.2509	50	60.5524	18870	18870	18868	0/0		1.85	1013	0.0007241	0.02041	0.273
1904247_Proteos_005.RAW	AF-M	Artificial Fingerprint	High	Sequest HT	Sequest HT (A2)	A	2	Unambiguous	TNAENEFVTIKK	TnAENEFVTIKK	N2(Deamidated)	1	1	P04264	P04264	Keratin, type II cytoskeletal 1 OS=Homo sapiens OX=9606 GN=KRT1 PE=1 SV=6	1	2	2	0.173	0	1	1	1	697.862	1394.72	1394.72	0.21	0.00015	0	0	170452	HCD	MS2	0	50	60.5972	18880	18880	18879	0/0		1.85	1529	0.001797	0.04661	0.148
1904247_Proteos_005.RAW	AF-M	Artificial Fingerprint	High	Sequest HT	Sequest HT (A2)	A	2	Unambiguous	QEYEQLIAK	QEYEQLIAK		1	1	P35527	P35527	Keratin, type I cytoskeletal 9 OS=Homo sapiens OX=9606 GN=KRT9 PE=1 SV=3	0	2	2	0.4946	0	1	1	1	561.296	1121.58	1121.58	0.61	0.00034	0	0	4637048	HCD	MS2	0.360112	14.973	60.6744	18900	18900	18899	0/0		2.79	945	0.002625	0.06437	0.099
1904247_Proteos_005.RAW	AF-M	Artificial Fingerprint	High	Sequest HT	Sequest HT (A2)	A	2	Unambiguous	VQALEEANNDLENK	VQALEEANnDLENK	N9(Deamidated)	1	1	P35527	P35527	Keratin, type I cytoskeletal 9 OS=Homo sapiens OX=9606 GN=KRT9 PE=1 SV=3	0	2	2	0.0028	0	1	1	1	794.378	1587.75	1587.75	-0.22	-0.00018	0	0	1.18761e+06	HCD	MS2	1.26559	50	60.7098	18910	18910	18909	0/0		3.52	3008	0	0.000679	0.785
1904247_Proteos_005.RAW	AF-M	Artificial Fingerprint	High	Sequest HT	Sequest HT (A2)	A	2	Unambiguous	VQALEEANNDLENK	VQALEEAnNDLENK	N8(Deamidated)	1	1	P35527	P35527	Keratin, type I cytoskeletal 9 OS=Homo sapiens OX=9606 GN=KRT9 PE=1 SV=3	0	2	2		0.0028	2	2	2	794.378	1587.75	1587.75	-0.22	-0.00018	0	0	1.18761e+06	HCD	MS2	1.26559	50	60.7098	18910	18910	18909	0/0		3.51	3008	0	0.0006696	0.787
1904247_Proteos_005.RAW	AF-M	Artificial Fingerprint	High	Sequest HT	Sequest HT (A2)	A	2	Unambiguous	GGSGGSHGGGSGFGGESGGSYGGGEEASGSGGGYGGGSGK	GGSGGSHGGGSGFGGESGGSYGGGEEASGSGGGYGGGSGK		1	1	P35527	P35527	Keratin, type I cytoskeletal 9 OS=Homo sapiens OX=9606 GN=KRT9 PE=1 SV=3	0	3	3	0.6185	0	1	1	1	1075.1	3223.28	3223.28	0.16	0.00017	0	0	181069	HCD	MS2	0	50	60.8413	18941	18941	18940	0/0		4.22	3967	0	0.0001138	1.053
1904247_Proteos_005.RAW	AF-M	Artificial Fingerprint	High	Sequest HT	Sequest HT (A2)	A	2	Unambiguous	LAVYIDR	LAVYIDR		1	1	P02545	P02545	Prelamin-A/C OS=Homo sapiens OX=9606 GN=LMNA PE=1 SV=1	0	2	2	0.4159	0	1	1	1	425.245	849.483	849.483	0.02	1e-05	0	0	54356.2	HCD	MS2	25.7599	50	61.0118	18986	18986	18985	0/0		1.13	390	0.0007241	0.01195	0.354
1904247_Proteos_005.RAW	AF-M	Artificial Fingerprint	High	Sequest HT	Sequest HT (A2)	A	2	Unambiguous	MTLDDFR	mTLDDFR	M1(Oxidation)	1	1	P35527	P35527	Keratin, type I cytoskeletal 9 OS=Homo sapiens OX=9606 GN=KRT9 PE=1 SV=3	0	2	2	0.3636	0	1	1	1	457.208	913.408	913.408	0.11	5e-05	0	0	216229	HCD	MS2	13.7737	50	61.0202	18989	18989	18988	0/0		1.32	973	0.0007241	0.02318	0.254
1904247_Proteos_005.RAW	AF-M	Artificial Fingerprint	High	Sequest HT	Sequest HT (A2)	A	2	Selected	NMQDMVEDYR	NmQDMVEDYR	M2(Oxidation)	1	1	P04264	P04264	Keratin, type II cytoskeletal 1 OS=Homo sapiens OX=9606 GN=KRT1 PE=1 SV=6	0	2	2		0.0385	2	2	2	658.766	1316.52	1316.52	0.11	7e-05	0	0	157824	HCD	MS2	0	50	61.0679	19001	19001	19000	0/0		1.5	1147	0.0007241	0.01041	0.375
1904247_Proteos_005.RAW	AF-M	Artificial Fingerprint	High	Sequest HT	Sequest HT (A2)	A	2	Unambiguous	QGVDADINGLR	QGVDADINGLR		1	1	P35527	P35527	Keratin, type I cytoskeletal 9 OS=Homo sapiens OX=9606 GN=KRT9 PE=1 SV=3	0	2	2	0.4348	0	1	1	1	579.299	1157.59	1157.59	-0.47	-0.00027	0	0	122498	HCD	MS2	57.6185	50	61.0696	19002	19002	19000	0/0		1.61	1025	0.001797	0.04041	0.17
1904247_Proteos_005.RAW	AF-M	Artificial Fingerprint	High	Sequest HT	Sequest HT (A2)	A	2	Unambiguous	TNAENEFVTIKK	TnAENEFVTIKK	N2(Deamidated)	1	1	P04264	P04264	Keratin, type II cytoskeletal 1 OS=Homo sapiens OX=9606 GN=KRT1 PE=1 SV=6	1	3	3	0.0167	0	1	1	1	465.577	1394.72	1394.72	0.18	8e-05	0	0	342247	HCD	MS2	10.7553	50	61.2409	19050	19050	19049	0/0		2.39	1529	0.001797	0.03839	0.178
1904247_Proteos_005.RAW	AF-M	Artificial Fingerprint	High	Sequest HT	Sequest HT (A2)	A	2	Unambiguous	TNAENEFVTIKK	TNAEnEFVTIKK	N5(Deamidated)	1	1	P04264	P04264	Keratin, type II cytoskeletal 1 OS=Homo sapiens OX=9606 GN=KRT1 PE=1 SV=6	1	3	3		0.0167	2	2	2	465.577	1394.72	1394.72	0.18	8e-05	0	0	342247	HCD	MS2	10.7553	50	61.2409	19050	19050	19049	0/0		2.35	1529	0.002625	0.05009	0.137
1904247_Proteos_005.RAW	AF-M	Artificial Fingerprint	High	Sequest HT	Sequest HT (A2)	A	2	Unambiguous	YETELNLR	YETELNLR		1	1	P02533	P02533	Keratin, type I cytoskeletal 14 OS=Homo sapiens OX=9606 GN=KRT14 PE=1 SV=4	0	2	2	0.425	0	1	1	1	519.267	1037.53	1037.53	0.32	0.00017	0	0	829524	HCD	MS2	19.1626	50	61.2426	19051	19051	19049	0/0		1.6	893	0.001797	0.03069	0.212
1904247_Proteos_005.RAW	AF-M	Artificial Fingerprint	High	Sequest HT	Sequest HT (A2)	A	2	Unambiguous	YGDGIQLTR	YGDGIQLTR		1	1	P15924	P15924	Desmoplakin OS=Homo sapiens OX=9606 GN=DSP PE=1 SV=3	0	2	2	0.474	0	1	1	1	511.767	1022.53	1022.53	0.36	0.00018	0	0	188465	HCD	MS2	26.1865	50	61.3219	19074	19074	19073	0/0		1.73	814	0.001797	0.03511	0.191
1904247_Proteos_005.RAW	AF-M	Artificial Fingerprint	High	Sequest HT	Sequest HT (A2)	A	2	Unambiguous	VTDSSVSVQLRE	VTDSSVSVQLRE		1	1	Q6ZVX7	Q6ZVX7	F-box only protein 50 OS=Homo sapiens OX=9606 GN=NCCRP1 PE=1 SV=1	1	2	2	0.5328	0	1	1	1	660.343	1319.68	1319.68	-0.49	-0.00032	0	0	191765	HCD	MS2	24.717	50	61.4139	19105	19105	19104	0/0		2.44	1294	0.0007241	0.02595	0.237
1904247_Proteos_005.RAW	AF-M	Artificial Fingerprint	High	Sequest HT	Sequest HT (A2)	A	2	Unambiguous	ETQTECEWTVDTSK	ETQTEcEWTVDTSK	C6(Carbamidomethyl)	1	1	P15924	P15924	Desmoplakin OS=Homo sapiens OX=9606 GN=DSP PE=1 SV=3	0	2	2	0.5057	0	1	1	1	857.366	1713.72	1713.73	-1.42	-0.00122	0	0	31735.4	HCD	MS2	13.128	50	61.4513	19121	19121	19117	0/0		1.76	3238	0.0007241	0.007676	0.421
1904247_Proteos_005.RAW	AF-M	Artificial Fingerprint	High	Sequest HT	Sequest HT (A2)	A	2	Unambiguous	VQALEEANNDLENK	VQALEEANNDLENK		1	1	P35527	P35527	Keratin, type I cytoskeletal 9 OS=Homo sapiens OX=9606 GN=KRT9 PE=1 SV=3	0	3	3	0.4189	0	1	1	1	529.594	1586.77	1586.77	0.19	0.0001	0	0	362441	HCD	MS2	0	50	61.4984	19141	19141	19139	0/0		2.22	2735	0.001797	0.03825	0.178
1904247_Proteos_005.RAW	AF-M	Artificial Fingerprint	High	Sequest HT	Sequest HT (A2)	A	2	Unambiguous	QRPSEIKDYSPYFK	QRPSEIKDYSPYFK		1	1	P08779	P08779	Keratin, type I cytoskeletal 16 OS=Homo sapiens OX=9606 GN=KRT16 PE=1 SV=4	1	4	4	0.3874	0	1	1	1	440.227	1757.89	1757.89	0.31	0.00014	0	0	356129	HCD	MS2	5.42272	50	61.5152	19146	19146	19145	0/0		3.02	2521	0.002625	0.05311	0.128
1904247_Proteos_005.RAW	AF-M	Artificial Fingerprint	High	Sequest HT	Sequest HT (A2)	A	2	Unambiguous	QRPSEIKDYSPYFK	QRPSEIKDYSPYFK		1	1	P08779	P08779	Keratin, type I cytoskeletal 16 OS=Homo sapiens OX=9606 GN=KRT16 PE=1 SV=4	1	3	3	0.4755	0	1	1	1	586.634	1757.89	1757.89	0.73	0.00043	0	0	253648	HCD	MS2	14.9535	50	61.5718	19168	19168	19167	0/0		2.65	2557	0.001797	0.03971	0.173
1904247_Proteos_005.RAW	AF-M	Artificial Fingerprint	High	Sequest HT	Sequest HT (A2)	A	2	Unambiguous	VQALEEANNDLENK	VQALEEANNDLENK		1	1	P35527	P35527	Keratin, type I cytoskeletal 9 OS=Homo sapiens OX=9606 GN=KRT9 PE=1 SV=3	0	2	2	0.4373	0	1	1	1	793.886	1586.77	1586.77	-0.14	-0.00011	0	0	8567873	HCD	MS2	0.219563	9.715	61.5847	19175	19175	19172	0/0		3.59	2771	0	0.0003234	0.896
1904247_Proteos_005.RAW	AF-M	Artificial Fingerprint	High	Sequest HT	Sequest HT (A2)	A	2	Unambiguous	AAMIVNQLSK	AAMIVNQLSK		1	1	P14923	P14923	Junction plakoglobin OS=Homo sapiens OX=9606 GN=JUP PE=1 SV=3	0	2	2	0.233	0	1	1	1	537.802	1074.6	1074.6	-0.92	-0.00049	0	0	173398	HCD	MS2	51.5588	50	61.6192	19190	19190	19187	0/0		1.76	948	0.0007241	0.0226	0.258
1904247_Proteos_005.RAW	AF-M	Artificial Fingerprint	High	Sequest HT	Sequest HT (A2)	A	2	Unambiguous	LLEGEDAHLSSQQASGQSYSSR	LLEGEDAHLSSQQASGQSYSSR		1	1	P08779	P08779	Keratin, type I cytoskeletal 16 OS=Homo sapiens OX=9606 GN=KRT16 PE=1 SV=4	0	3	3	0.2938	0	1	1	1	784.035	2350.09	2350.09	0.38	0.0003	0	0	142318	HCD	MS2	10.688	50	61.6296	19195	19195	19193	0/0		2.11	7310	0.0007241	0.01176	0.356
1904247_Proteos_005.RAW	AF-M	Artificial Fingerprint	High	Sequest HT	Sequest HT (A2)	A	2	Unambiguous	QEYEQLIAK	QEYEQLIAK		1	1	P35527	P35527	Keratin, type I cytoskeletal 9 OS=Homo sapiens OX=9606 GN=KRT9 PE=1 SV=3	0	2	2	0.5022	0	1	1	1	561.296	1121.58	1121.58	0.39	0.00022	0	0	492002	HCD	MS2	32.3177	50	61.7081	19237	19237	19234	0/0		2.29	996	0.001797	0.03863	0.177
1904247_Proteos_005.RAW	AF-M	Artificial Fingerprint	High	Sequest HT	Sequest HT (A2)	A	2	Unambiguous	GGSGGSHGGGSGFGGESGGSYGGGEEASGSGGGYGGGSGK	GGSGGSHGGGSGFGGESGGSYGGGEEASGSGGGYGGGSGK		1	1	P35527	P35527	Keratin, type I cytoskeletal 9 OS=Homo sapiens OX=9606 GN=KRT9 PE=1 SV=3	0	3	3	0.5307	0	1	1	1	1075.1	3223.28	3223.28	0.04	5e-05	0	0	190989	HCD	MS2	3.24476	50	61.8479	19297	19297	19296	0/0		4.07	3886	0	0.0001078	1.061
1904247_Proteos_005.RAW	AF-M	Artificial Fingerprint	High	Sequest HT	Sequest HT (A2)	A	2	Unambiguous	QGVDADINGLR	QGVDADInGLR	N8(Deamidated)	1	1	P35527	P35527	Keratin, type I cytoskeletal 9 OS=Homo sapiens OX=9606 GN=KRT9 PE=1 SV=3	0	2	2	0.284	0	1	1	1	579.788	1158.57	1158.57	-4.8	-0.00278	0	0	93300.8	HCD	MS2	57.6651	50	61.895	19313	19313	19312	0/0		1.69	1151	0.005861	0.08618	0.053
1904247_Proteos_005.RAW	AF-M	Artificial Fingerprint	High	Sequest HT	Sequest HT (A2)	A	2	Unambiguous	VTPNLMGHLCGNQR	VTPNLMGHLcGNQR	C10(Carbamidomethyl)	1	1	Q16610	Q16610	Extracellular matrix protein 1 OS=Homo sapiens OX=9606 GN=ECM1 PE=1 SV=2	0	3	3	0.2061	0	1	1	1	532.929	1596.77	1596.77	-0.53	-0.00028	0	0	114832	HCD	MS2	20.1139	50	61.9615	19336	19336	19334	0/0		1.65	2857	0.001797	0.02956	0.217
1904247_Proteos_005.RAW	AF-M	Artificial Fingerprint	High	Sequest HT	Sequest HT (A2)	A	2	Unambiguous	MTLDDFR	mTLDDFR	M1(Oxidation)	1	1	P35527	P35527	Keratin, type I cytoskeletal 9 OS=Homo sapiens OX=9606 GN=KRT9 PE=1 SV=3	0	2	2	0.5211	0	1	1	1	457.207	913.408	913.408	-0.76	-0.00035	0	0	539713	HCD	MS2	1.65843	50	62.0282	19357	19357	19356	0/0		1.9	986	0.001406	0.0272	0.23
1904247_Proteos_005.RAW	AF-M	Artificial Fingerprint	High	Sequest HT	Sequest HT (A2)	A	2	Unambiguous	QVLDNLTMEK	QVLDNLTmEK	M8(Oxidation)	1	1	P35527	P35527	Keratin, type I cytoskeletal 9 OS=Homo sapiens OX=9606 GN=KRT9 PE=1 SV=3	0	2	2	0.3624	0	1	1	1	603.805	1206.6	1206.6	-0.12	-7e-05	0	0	4219365	HCD	MS2	0.524959	20.461	62.0362	19360	19360	19359	0/0		2.18	1350	0.002625	0.05328	0.128
1904247_Proteos_005.RAW	AF-M	Artificial Fingerprint	High	Sequest HT	Sequest HT (A2)	A	2	Unambiguous	NMQDMVEDYR	NmQDMVEDYR	M2(Oxidation)	1	1	P04264	P04264	Keratin, type II cytoskeletal 1 OS=Homo sapiens OX=9606 GN=KRT1 PE=1 SV=6	0	2	2	0.0853	0	1	1	1	658.765	1316.52	1316.52	-1.28	-0.00084	0	0	147836	HCD	MS2	7.9044	50	62.0756	19372	19372	19371	0/0		1.29	1065	0.002625	0.05129	0.134
1904247_Proteos_005.RAW	AF-M	Artificial Fingerprint	High	Sequest HT	Sequest HT (A2)	A	2	Unambiguous	QSVEADINGLR	QSVEADInGLR	N8(Deamidated)	1	3	P13645	Q2M2I5; P13645; P13646	Keratin, type I cytoskeletal 24 OS=Homo sapiens OX=9606 GN=KRT24 PE=1 SV=1; Keratin, type I cytoskeletal 10 OS=Homo sapiens OX=9606 GN=KRT10 PE=1 SV=6; Keratin, type I cytoskeletal 13 OS=Homo sapiens OX=9606 GN=KRT13 PE=1 SV=4	0	2	2	0.4338	0	1	1	1	601.804	1202.6	1202.6	0.28	0.00017	0	0	2.18575e+06	HCD	MS2	0.822183	34.531	62.2436	19413	19413	19410	0/0		3.02	1307	0	0.0008902	0.744
1904247_Proteos_005.RAW	AF-M	Artificial Fingerprint	High	Sequest HT	Sequest HT (A2)	A	2	Unambiguous	YGDGIQLTR	YGDGIQLTR		1	1	P15924	P15924	Desmoplakin OS=Homo sapiens OX=9606 GN=DSP PE=1 SV=3	0	2	2	0.3654	0	1	1	1	511.767	1022.53	1022.53	0.24	0.00012	0	0	456113	HCD	MS2	14.2778	50	62.3332	19441	19441	19440	0/0		2.08	814	0.0007241	0.005504	0.471
1904247_Proteos_005.RAW	AF-M	Artificial Fingerprint	High	Sequest HT	Sequest HT (A2)	A	2	Unambiguous	IEISELNR	IEISELNR		2	2	P35908; P04264	P35908; P04264	Keratin, type II cytoskeletal 2 epidermal OS=Homo sapiens OX=9606 GN=KRT2 PE=1 SV=2; Keratin, type II cytoskeletal 1 OS=Homo sapiens OX=9606 GN=KRT1 PE=1 SV=6	0	2	2	0.1818	0	1	1	1	487.27	973.532	973.531	0.64	0.00031	0	0	113494232	HCD	MS2	0.0310096	0.793	62.4699	19490	19490	19489	0/0		2.2	1018	0.007067	0.09025	0.046
1904247_Proteos_005.RAW	AF-M	Artificial Fingerprint	High	Sequest HT	Sequest HT (A2)	A	2	Unambiguous	VQALEEANNDLENK	VQALEEANNDLENK		1	1	P35527	P35527	Keratin, type I cytoskeletal 9 OS=Homo sapiens OX=9606 GN=KRT9 PE=1 SV=3	0	3	3	0.4599	0	1	1	1	529.594	1586.77	1586.77	0.54	0.00029	0	0	1.40221e+06	HCD	MS2	0	50	62.5094	19503	19503	19502	0/0		2.74	2687	0.0007241	0.00448	0.502
1904247_Proteos_005.RAW	AF-M	Artificial Fingerprint	High	Sequest HT	Sequest HT (A2)	A	2	Unambiguous	VQALEEANNDLENK	VQALEEANNDLENK		1	1	P35527	P35527	Keratin, type I cytoskeletal 9 OS=Homo sapiens OX=9606 GN=KRT9 PE=1 SV=3	0	2	2	0.3333	0	1	1	1	793.886	1586.76	1586.77	-0.45	-0.00036	0	0	2157012	HCD	MS2	0	42.067	62.5914	19527	19527	19526	0/0		3.42	2821	0	0.001559	0.66
1904247_Proteos_005.RAW	AF-M	Artificial Fingerprint	High	Sequest HT	Sequest HT (A2)	A	2	Unambiguous	LDSELKNMQDMVEDYR	LDSELKNmQDmVEDYR	M8(Oxidation); M11(Oxidation)	1	1	P04264	P04264	Keratin, type II cytoskeletal 1 OS=Homo sapiens OX=9606 GN=KRT1 PE=1 SV=6	1	3	3	0.1991	0	1	1	1	673.3	2017.88	2017.88	0.18	0.00012	0	0	831441	HCD	MS2	0	50	62.7601	19581	19581	19580	0/0		2.16	5131	0.001406	0.02752	0.228
1904247_Proteos_005.RAW	AF-M	Artificial Fingerprint	High	Sequest HT	Sequest HT (A2)	A	2	Unambiguous	GGSGGSHGGGSGFGGESGGSYGGGEEASGSGGGYGGGSGK	GGSGGSHGGGSGFGGESGGSYGGGEEASGSGGGYGGGSGK		1	1	P35527	P35527	Keratin, type I cytoskeletal 9 OS=Homo sapiens OX=9606 GN=KRT9 PE=1 SV=3	0	3	3	0.3972	0	1	1	1	1075.1	3223.28	3223.28	0.38	0.00041	0	0	130797	HCD	MS2	0	50	62.8555	19612	19612	19611	0/0		2.87	4047	0	0.0003982	0.865
1904247_Proteos_005.RAW	AF-M	Artificial Fingerprint	High	Sequest HT	Sequest HT (A2)	A	2	Unambiguous	VTATDLDEPDTLHTR	VTATDLDEPDTLHTR		1	1	Q08554	Q08554	Desmocollin-1 OS=Homo sapiens OX=9606 GN=DSC1 PE=1 SV=2	0	3	3	0.2028	0	1	1	1	561.944	1683.82	1683.82	0.13	7e-05	0	0	178760	HCD	MS2	42.6437	50	62.8832	19619	19619	19616	0/0		2.12	3000	0.009708	0.1172	0.005
1904247_Proteos_005.RAW	AF-M	Artificial Fingerprint	High	Sequest HT	Sequest HT (A2)	A	2	Unambiguous	QGVDADINGLR	QGVDADInGLR	N8(Deamidated)	1	1	P35527	P35527	Keratin, type I cytoskeletal 9 OS=Homo sapiens OX=9606 GN=KRT9 PE=1 SV=3	0	2	2	0.2545	0	1	1	1	579.792	1158.58	1158.57	2.26	0.00131	0	0	103102	HCD	MS2	59.9758	50	62.8959	19622	19622	19621	0/0		2.24	1150	0.002625	0.06115	0.107
1904247_Proteos_005.RAW	AF-M	Artificial Fingerprint	High	Sequest HT	Sequest HT (A2)	A	2	Unambiguous	MTLDDFR	mTLDDFR	M1(Oxidation)	1	1	P35527	P35527	Keratin, type I cytoskeletal 9 OS=Homo sapiens OX=9606 GN=KRT9 PE=1 SV=3	0	2	2	0.4493	0	1	1	1	457.208	913.408	913.408	0.11	5e-05	0	0	1.08882e+06	HCD	MS2	0	50	63.0316	19659	19659	19658	0/0		2.07	973	0.001797	0.03968	0.173
1904247_Proteos_005.RAW	AF-M	Artificial Fingerprint	High	Sequest HT	Sequest HT (A2)	A	2	Unambiguous	QVLDNLTMEK	QVLDNLTmEK	M8(Oxidation)	1	1	P35527	P35527	Keratin, type I cytoskeletal 9 OS=Homo sapiens OX=9606 GN=KRT9 PE=1 SV=3	0	2	2	0.4408	0	1	1	1	603.806	1206.6	1206.6	0.28	0.00017	0	0	959177	HCD	MS2	5.38422	50	63.0408	19663	19663	19662	0/0		2.11	1344	0.001797	0.03299	0.201
1904247_Proteos_005.RAW	AF-M	Artificial Fingerprint	High	Sequest HT	Sequest HT (A2)	A	2	Unambiguous	QGVDADINGLR	QGVDADInGLR	N8(Deamidated)	1	1	P35527	P35527	Keratin, type I cytoskeletal 9 OS=Homo sapiens OX=9606 GN=KRT9 PE=1 SV=3	0	2	2	0.4181	0	1	1	1	579.792	1158.58	1158.57	0.89	0.00052	0	0	50379340	HCD	MS2	0.660203	11.613	63.2569	19728	19728	19726	0/0		2.99	1262	0.0007241	0.01794	0.293
1904247_Proteos_005.RAW	AF-M	Artificial Fingerprint	High	Sequest HT	Sequest HT (A2)	A	2	Unambiguous	TTAENEFVMLKK	TTAENEFVMLKK		1	1	P13647	P13647	Keratin, type II cytoskeletal 5 OS=Homo sapiens OX=9606 GN=KRT5 PE=1 SV=3	1	2	2	0.299	0	1	1	1	705.868	1410.73	1410.73	-0.13	-9e-05	0	0	286796	HCD	MS2	5.89577	50	63.2676	19732	19732	19731	0/0		2.04	1368	0.0007241	0.01712	0.3
1904247_Proteos_005.RAW	AF-M	Artificial Fingerprint	High	Sequest HT	Sequest HT (A2)	A	2	Unambiguous	ALEESNYELEGK	ALEESnYELEGK	N6(Deamidated)	1	1	P13645	P13645	Keratin, type I cytoskeletal 10 OS=Homo sapiens OX=9606 GN=KRT10 PE=1 SV=6	0	2	2	0.4822	0	1	1	1	691.819	1382.63	1382.63	-0.48	-0.00033	0	0	436302	HCD	MS2	9.43545	50	63.3242	19754	19754	19753	0/0		2.53	2016	0	0.001309	0.686
1904247_Proteos_005.RAW	AF-M	Artificial Fingerprint	High	Sequest HT	Sequest HT (A2)	A	2	Unambiguous	HVTSECLGWMR	HVTSEcLGWMR	C6(Carbamidomethyl)	1	1	P15924	P15924	Desmoplakin OS=Homo sapiens OX=9606 GN=DSP PE=1 SV=3	0	3	3	0.2909	0	1	1	1	459.213	1375.62	1375.62	-0.98	-0.00045	0	0	189585	HCD	MS2	29.6579	50	63.43	19793	19793	19792	0/0		1.65	2055	0.002625	0.05931	0.111
1904247_Proteos_005.RAW	AF-M	Artificial Fingerprint	High	Sequest HT	Sequest HT (A2)	A	2	Unambiguous	IEISELNR	IEISELNR		2	2	P35908; P04264	P35908; P04264	Keratin, type II cytoskeletal 2 epidermal OS=Homo sapiens OX=9606 GN=KRT2 PE=1 SV=2; Keratin, type II cytoskeletal 1 OS=Homo sapiens OX=9606 GN=KRT1 PE=1 SV=6	0	2	2	0.1818	0	1	1	1	487.269	973.531	973.531	0.01	1e-05	0	0	2.78956e+06	HCD	MS2	0	27.45	63.476	19810	19810	19809	0/0		2.2	1017	0.0007241	0.01784	0.294
1904247_Proteos_005.RAW	AF-M	Artificial Fingerprint	High	Sequest HT	Sequest HT (A2)	A	2	Unambiguous	VQALEEANNDLENK	VQALEEANNDLENK		1	1	P35527	P35527	Keratin, type I cytoskeletal 9 OS=Homo sapiens OX=9606 GN=KRT9 PE=1 SV=3	0	3	3	0.2434	0	1	1	1	529.594	1586.77	1586.77	0.43	0.00023	0	0	240191	HCD	MS2	11.9299	50	63.5142	19823	19823	19822	0/0		1.52	2733	0.007067	0.09274	0.042
1904247_Proteos_005.RAW	AF-M	Artificial Fingerprint	High	Sequest HT	Sequest HT (A2)	A	2	Unambiguous	VQALEEANNDLENK	VQALEEANnDLENK	N9(Deamidated)	1	1	P35527	P35527	Keratin, type I cytoskeletal 9 OS=Homo sapiens OX=9606 GN=KRT9 PE=1 SV=3	0	2	2	0.007	0	1	1	1	794.38	1587.75	1587.75	2.47	0.00196	0	0	624163	HCD	MS2	25.6659	50	63.5943	19845	19845	19844	0/0		4.31	2943	0	0.0003428	0.888
1904247_Proteos_005.RAW	AF-M	Artificial Fingerprint	High	Sequest HT	Sequest HT (A2)	A	2	Unambiguous	VQALEEANNDLENK	VQALEEAnNDLENK	N8(Deamidated)	1	1	P35527	P35527	Keratin, type I cytoskeletal 9 OS=Homo sapiens OX=9606 GN=KRT9 PE=1 SV=3	0	2	2		0.007	2	2	2	794.38	1587.75	1587.75	2.47	0.00196	0	0	624163	HCD	MS2	25.6659	50	63.5943	19845	19845	19844	0/0		4.28	2943	0	0.0003584	0.881
1904247_Proteos_005.RAW	AF-M	Artificial Fingerprint	High	Sequest HT	Sequest HT (A2)	A	2	Unambiguous	RLLEGEDAHLSSSQFSSGSQSSR	RLLEGEDAHLSSSQFSSGSQSSR		1	1	P02533	P02533	Keratin, type I cytoskeletal 14 OS=Homo sapiens OX=9606 GN=KRT14 PE=1 SV=4	1	4	4	0.2897	0	1	1	1	617.047	2465.17	2465.17	0.22	0.00013	0	0	650628	HCD	MS2	15.9921	50	63.8473	19914	19914	19913	0/0		2.9	7838	0.0007241	0.01869	0.287
1904247_Proteos_005.RAW	AF-M	Artificial Fingerprint	High	Sequest HT	Sequest HT (A2)	A	2	Unambiguous	GGSGGSHGGGSGFGGESGGSYGGGEEASGSGGGYGGGSGK	GGSGGSHGGGSGFGGESGGSYGGGEEASGSGGGYGGGSGK		1	1	P35527	P35527	Keratin, type I cytoskeletal 9 OS=Homo sapiens OX=9606 GN=KRT9 PE=1 SV=3	0	3	3	0.5808	0	1	1	1	1075.1	3223.28	3223.28	0.04	5e-05	0	0	197837	HCD	MS2	0	50	63.8599	19917	19917	19916	0/0		3.34	3886	0	0.0001283	1.035
1904247_Proteos_005.RAW	AF-M	Artificial Fingerprint	High	Sequest HT	Sequest HT (A2)	A	2	Unambiguous	VTATDLDEPDTLHTR	VTATDLDEPDTLHTR		1	1	Q08554	Q08554	Desmocollin-1 OS=Homo sapiens OX=9606 GN=DSC1 PE=1 SV=2	0	3	3	0.2208	0	1	1	1	561.945	1683.82	1683.82	0.56	0.00032	0	0	329497	HCD	MS2	13.8557	50	63.8929	19926	19926	19925	0/0		2.4	3014	0.0007241	0.004016	0.518
1904247_Proteos_005.RAW	AF-M	Artificial Fingerprint	High	Sequest HT	Sequest HT (A2)	A	2	Unambiguous	QGVDADINGLR	QGVDADInGLR	N8(Deamidated)	1	1	P35527	P35527	Keratin, type I cytoskeletal 9 OS=Homo sapiens OX=9606 GN=KRT9 PE=1 SV=3	0	2	2	0.44	0	1	1	1	579.792	1158.58	1158.57	0.89	0.00052	0	0	15107758	HCD	MS2	0.30731	5.524	63.9025	19930	19930	19929	0/0		3	1262	0.0007241	0.00427	0.509
1904247_Proteos_005.RAW	AF-M	Artificial Fingerprint	High	Sequest HT	Sequest HT (A2)	A	2	Unambiguous	TEELNKEVASNSELVQSSR	TEELnKEVASNSELVQSSR	N5(Deamidated)	1	1	P08779	P08779	Keratin, type I cytoskeletal 16 OS=Homo sapiens OX=9606 GN=KRT16 PE=1 SV=4	1	3	3	0.0194	0	1	1	1	707.682	2121.03	2121.03	0.15	0.00011	0	0	120462	HCD	MS2	4.54535	50	63.9437	19940	19940	19939	0/0		2.06	4899	0.006305	0.08848	0.049
1904247_Proteos_005.RAW	AF-M	Artificial Fingerprint	High	Sequest HT	Sequest HT (A2)	A	2	Unambiguous	TEELNKEVASNSELVQSSR	TEELNKEVASnSELVQSSR	N11(Deamidated)	1	1	P08779	P08779	Keratin, type I cytoskeletal 16 OS=Homo sapiens OX=9606 GN=KRT16 PE=1 SV=4	1	3	3		0.0194	2	2	2	707.682	2121.03	2121.03	0.15	0.00011	0	0	120462	HCD	MS2	4.54535	50	63.9437	19940	19940	19939	0/0		2.02	4899	0.002625	0.04912	0.14
1904247_Proteos_005.RAW	AF-M	Artificial Fingerprint	High	Sequest HT	Sequest HT (A2)	A	2	Unambiguous	MTLDDFR	mTLDDFR	M1(Oxidation)	1	1	P35527	P35527	Keratin, type I cytoskeletal 9 OS=Homo sapiens OX=9606 GN=KRT9 PE=1 SV=3	0	2	2	0.5076	0	1	1	1	457.208	913.409	913.408	0.18	8e-05	0	0	984516	HCD	MS2	0.492845	50	64.0385	19971	19971	19970	0/0		1.97	971	0.001797	0.0391	0.175
1904247_Proteos_005.RAW	AF-M	Artificial Fingerprint	High	Sequest HT	Sequest HT (A2)	A	2	Unambiguous	QVLDNLTMEK	QVLDNLTmEK	M8(Oxidation)	1	1	P35527	P35527	Keratin, type I cytoskeletal 9 OS=Homo sapiens OX=9606 GN=KRT9 PE=1 SV=3	0	2	2	0.3846	0	1	1	1	603.806	1206.6	1206.6	0.39	0.00023	0	0	448530	HCD	MS2	3.93699	50	64.045	19973	19973	19972	0/0		1.82	1340	0.0007241	0.01582	0.312
1904247_Proteos_005.RAW	AF-M	Artificial Fingerprint	High	Sequest HT	Sequest HT (A2)	A	2	Unambiguous	GLGVGFGSGGGSSSSVK	GLGVGFGSGGGSSSSVK		1	1	P13647	P13647	Keratin, type II cytoskeletal 5 OS=Homo sapiens OX=9606 GN=KRT5 PE=1 SV=3	0	2	2	0.5455	0	1	1	1	720.36	1439.71	1439.71	0.39	0.00028	0	0	171487	HCD	MS2	14.6685	50	64.2362	20030	20030	20029	0/0		2.31	2119	0.001797	0.03055	0.212
1904247_Proteos_005.RAW	AF-M	Artificial Fingerprint	High	Sequest HT	Sequest HT (A2)	A	2	Unambiguous	ALEESNYELEGK	ALEESnYELEGK	N6(Deamidated)	1	1	P13645	P13645	Keratin, type I cytoskeletal 10 OS=Homo sapiens OX=9606 GN=KRT10 PE=1 SV=6	0	2	2	0.4532	0	1	1	1	691.819	1382.63	1382.63	-0.83	-0.00058	0	0	116216	HCD	MS2	12.958	50	64.3305	20064	20064	20063	0/0		2.03	2006	0.001406	0.02842	0.223
1904247_Proteos_005.RAW	AF-M	Artificial Fingerprint	High	Sequest HT	Sequest HT (A2)	A	2	Unambiguous	IEISELNR	IEISELNR		2	2	P35908; P04264	P35908; P04264	Keratin, type II cytoskeletal 2 epidermal OS=Homo sapiens OX=9606 GN=KRT2 PE=1 SV=2; Keratin, type II cytoskeletal 1 OS=Homo sapiens OX=9606 GN=KRT1 PE=1 SV=6	0	2	2	0.1212	0	1	1	1	487.269	973.531	973.531	0.07	4e-05	0	0	532219	HCD	MS2	0	50	64.4827	20115	20115	20114	0/0		1.98	1017	0.0007241	0.007434	0.425
1904247_Proteos_005.RAW	AF-M	Artificial Fingerprint	High	Sequest HT	Sequest HT (A2)	A	2	Unambiguous	VQALEEANNDLENK	VQALEEANnDLENK	N9(Deamidated)	1	1	P35527	P35527	Keratin, type I cytoskeletal 9 OS=Homo sapiens OX=9606 GN=KRT9 PE=1 SV=3	0	2	2	0.0083	0	1	1	1	794.379	1587.75	1587.75	0.24	0.00019	0	0	371863	HCD	MS2	61.3148	50	64.5979	20154	20154	20153	0/0		3.63	2939	0	0.0001984	0.97
1904247_Proteos_005.RAW	AF-M	Artificial Fingerprint	High	Sequest HT	Sequest HT (A2)	A	2	Unambiguous	VQALEEANNDLENK	VQALEEAnNDLENK	N8(Deamidated)	1	1	P35527	P35527	Keratin, type I cytoskeletal 9 OS=Homo sapiens OX=9606 GN=KRT9 PE=1 SV=3	0	2	2		0.0083	2	2	2	794.379	1587.75	1587.75	0.24	0.00019	0	0	371863	HCD	MS2	61.3148	50	64.5979	20154	20154	20153	0/0		3.6	2939	0	0.0002073	0.963
1904247_Proteos_005.RAW	AF-M	Artificial Fingerprint	High	Sequest HT	Sequest HT (A2)	A	2	Unambiguous	QCANLQNAIADAEQR	QcANLqNAIADAEQR	C2(Carbamidomethyl); Q6(Deamidated)	1	1	P13647	P13647	Keratin, type II cytoskeletal 5 OS=Homo sapiens OX=9606 GN=KRT5 PE=1 SV=3	0	3	3	0.0973	0	1	1	1	568.268	1702.79	1702.78	4.67	0.00265	0	0	40814.6	HCD	MS2	20.3398	50	64.6719	20174	20174	20173	0/0		1.85	3276	0.0007241	0.01334	0.337
1904247_Proteos_005.RAW	AF-M	Artificial Fingerprint	High	Sequest HT	Sequest HT (A2)	A	2	Unambiguous	QCANLQNAIADAEQR	QcANLQnAIADAEQR	C2(Carbamidomethyl); N7(Deamidated)	1	1	P13647	P13647	Keratin, type II cytoskeletal 5 OS=Homo sapiens OX=9606 GN=KRT5 PE=1 SV=3	0	3	3	0.0973	0	1	2	2	568.268	1702.79	1702.78	4.67	0.00265	0	0	40814.6	HCD	MS2	20.3398	50	64.6719	20174	20174	20173	0/0		1.85	3276	0.0007241	0.01335	0.337
1904247_Proteos_005.RAW	AF-M	Artificial Fingerprint	High	Sequest HT	Sequest HT (A2)	A	2	Unambiguous	MSVEADINGLR	mSVEADInGLR	M1(Oxidation); N8(Deamidated)	1	2	P02533	P02533; P08727	Keratin, type I cytoskeletal 14 OS=Homo sapiens OX=9606 GN=KRT14 PE=1 SV=4; Keratin, type I cytoskeletal 19 OS=Homo sapiens OX=9606 GN=KRT19 PE=1 SV=4	0	2	2	0.463	0	1	1	1	611.293	1221.58	1221.58	-0.04	-3e-05	0	0	400287	HCD	MS2	9.45483	50	64.7797	20205	20205	20204	0/0		2.7	1390	0	0.0005146	0.827
1904247_Proteos_005.RAW	AF-M	Artificial Fingerprint	High	Sequest HT	Sequest HT (A2)	A	2	Unambiguous	TEELNKEVASNSELVQSSR	TEELNKEVASNSELVQSSR		1	1	P08779	P08779	Keratin, type I cytoskeletal 16 OS=Homo sapiens OX=9606 GN=KRT16 PE=1 SV=4	1	3	3	0.5822	0	1	1	1	707.354	2120.05	2120.05	0.24	0.00017	0	0	368566	HCD	MS2	3.67435	50	64.8415	20224	20224	20223	0/0		3.71	4179	0	0.0003016	0.907
1904247_Proteos_005.RAW	AF-M	Artificial Fingerprint	High	Sequest HT	Sequest HT (A2)	A	2	Unambiguous	GGSGGSHGGGSGFGGESGGSYGGGEEASGSGGGYGGGSGK	GGSGGSHGGGSGFGGESGGSYGGGEEASGSGGGYGGGSGK		1	1	P35527	P35527	Keratin, type I cytoskeletal 9 OS=Homo sapiens OX=9606 GN=KRT9 PE=1 SV=3	0	3	3	0.6528	0	1	1	1	1075.1	3223.28	3223.28	0.61	0.00066	0	0	190894	HCD	MS2	0	50	64.8676	20234	20234	20233	0/0		4.32	4132	0	0.0001377	1.025
1904247_Proteos_005.RAW	AF-M	Artificial Fingerprint	High	Sequest HT	Sequest HT (A2)	A	2	Unambiguous	QGVDADINGLR	QGVDADInGLR	N8(Deamidated)	1	1	P35527	P35527	Keratin, type I cytoskeletal 9 OS=Homo sapiens OX=9606 GN=KRT9 PE=1 SV=3	0	2	2	0.4415	0	1	1	1	579.791	1158.58	1158.57	0.26	0.00015	0	0	4421874	HCD	MS2	0.216098	18.026	64.9094	20246	20246	20245	0/0		2.99	1265	0	0.002342	0.599
1904247_Proteos_005.RAW	AF-M	Artificial Fingerprint	High	Sequest HT	Sequest HT (A2)	A	2	Unambiguous	ISISTSGGSFR	ISISTSGGSFR		1	1	P13647	P13647	Keratin, type II cytoskeletal 5 OS=Homo sapiens OX=9606 GN=KRT5 PE=1 SV=3	0	2	2	0.4615	0	1	1	1	556.291	1111.57	1111.57	0.38	0.00021	0	0	1.92595e+06	HCD	MS2	0.33515	46.137	64.9811	20271	20271	20270	0/0		2.6	1009	0.001406	0.02818	0.225
1904247_Proteos_005.RAW	AF-M	Artificial Fingerprint	High	Sequest HT	Sequest HT (A2)	A	2	Unambiguous	QEYEQLIAK	QEYEqLIAK	Q5(Deamidated)	1	1	P35527	P35527	Keratin, type I cytoskeletal 9 OS=Homo sapiens OX=9606 GN=KRT9 PE=1 SV=3	0	2	2	0.1748	0	1	1	1	561.787	1122.57	1122.57	-0.38	-0.00021	0	0	280373	HCD	MS2	26.581	50	65.0286	20282	20282	20281	0/0		2.06	1077	0.0007241	0.02553	0.24
1904247_Proteos_005.RAW	AF-M	Artificial Fingerprint	High	Sequest HT	Sequest HT (A2)	A	2	Unambiguous	MTLDDFR	mTLDDFR	M1(Oxidation)	1	1	P35527	P35527	Keratin, type I cytoskeletal 9 OS=Homo sapiens OX=9606 GN=KRT9 PE=1 SV=3	0	2	2	0.435	0	1	1	1	457.208	913.408	913.408	-0.22	-0.0001	0	0	1.06886e+06	HCD	MS2	1.25837	50	65.0455	20288	20288	20287	0/0		2	893	0.001797	0.03458	0.194
1904247_Proteos_005.RAW	AF-M	Artificial Fingerprint	High	Sequest HT	Sequest HT (A2)	A	2	Unambiguous	QVLDNLTMEK	QVLDNLTmEK	M8(Oxidation)	1	1	P35527	P35527	Keratin, type I cytoskeletal 9 OS=Homo sapiens OX=9606 GN=KRT9 PE=1 SV=3	0	2	2	0.362	0	1	1	1	603.805	1206.6	1206.6	0.08	5e-05	0	0	284544	HCD	MS2	21.8223	50	65.0549	20292	20292	20290	0/0		1.63	1348	0.002625	0.06047	0.108
1904247_Proteos_005.RAW	AF-M	Artificial Fingerprint	High	Sequest HT	Sequest HT (A2)	A	2	Unambiguous	YLDGLTAER	YLDGLTAER		1	1	P35908	P35908	Keratin, type II cytoskeletal 2 epidermal OS=Homo sapiens OX=9606 GN=KRT2 PE=1 SV=2	0	2	2	0.3672	0	1	1	1	519.267	1037.53	1037.53	0.44	0.00023	0	0	692426	HCD	MS2	19.985	50	65.1244	20314	20314	20311	0/0		1.77	896	0.0007241	0.01268	0.345
1904247_Proteos_005.RAW	AF-M	Artificial Fingerprint	High	Sequest HT	Sequest HT (A2)	A	2	Unambiguous	LSEDYGVLK	LSEDYGVLK		1	1	P32119	P32119	Peroxiredoxin-2 OS=Homo sapiens OX=9606 GN=PRDX2 PE=1 SV=5	0	2	2	0.242	0	1	1	1	512.272	1023.54	1023.54	0.71	0.00036	0	0	228071	HCD	MS2	8.83334	50	65.1496	20320	20320	20319	0/0		1.57	798	0.0007241	0.009468	0.389
1904247_Proteos_005.RAW	AF-M	Artificial Fingerprint	High	Sequest HT	Sequest HT (A2)	A	2	Unambiguous	GDYPLEAVR	GDYPLEAVR		1	1	P14618	P14618	Pyruvate kinase PKM OS=Homo sapiens OX=9606 GN=PKM PE=1 SV=4	0	2	2	0.4079	0	1	1	1	510.262	1019.52	1019.52	0.46	0.00023	0	0	345851	HCD	MS2	7.35599	50	65.191	20334	20334	20333	0/0		1.52	971	0.002377	0.04759	0.145
1904247_Proteos_005.RAW	AF-M	Artificial Fingerprint	High	Sequest HT	Sequest HT (A2)	A	2	Unambiguous	ALEEANADLEVK	ALEEANADLEVK		2	4	P02533; P08779	P02533; P19012; P13646; P08779	Keratin, type I cytoskeletal 14 OS=Homo sapiens OX=9606 GN=KRT14 PE=1 SV=4; Keratin, type I cytoskeletal 15 OS=Homo sapiens OX=9606 GN=KRT15 PE=1 SV=3; Keratin, type I cytoskeletal 13 OS=Homo sapiens OX=9606 GN=KRT13 PE=1 SV=4; Keratin, type I cytoskeletal 16 OS=Homo sapiens OX=9606 GN=KRT16 PE=1 SV=4	0	2	2	0.3831	0	1	1	1	651.333	1301.66	1301.66	0.78	0.00051	0	0	12805387	HCD	MS2	0.132845	10.45	65.2106	20343	20343	20342	0/0		2.95	1457	0.0007241	0.01435	0.326
1904247_Proteos_005.RAW	AF-M	Artificial Fingerprint	High	Sequest HT	Sequest HT (A2)	A	2	Unambiguous	GGSGGSYGGGSGSGGGSGGGYGGGSGGGHSGGSGGGHSGGSGGNYGGGSGSGGGSGGGYGGGSGSR	GGSGGSYGGGSGSGGGSGGGYGGGSGGGHSGGSGGGHSGGSGGNYGGGSGSGGGSGGGYGGGSGSR		1	1	P35527	P35527	Keratin, type I cytoskeletal 9 OS=Homo sapiens OX=9606 GN=KRT9 PE=1 SV=3	0	4	4	0.413	0	1	1	1	1243.99	4972.93	4972.94	-1.61	-0.002	0	0	74712	HCD	MS2	0	50	65.2954	20369	20369	20368	0/0		2.3	1592	0.001797	0.04309	0.16
1904247_Proteos_005.RAW	AF-M	Artificial Fingerprint	High	Sequest HT	Sequest HT (A2)	A	2	Unambiguous	KQCANLQNAIADAEQR	KQcANLQNAIADAEQR	C3(Carbamidomethyl)	1	1	P13647	P13647	Keratin, type II cytoskeletal 5 OS=Homo sapiens OX=9606 GN=KRT5 PE=1 SV=3	1	3	3	0.2582	0	1	1	1	610.635	1829.89	1829.89	-0.48	-0.00029	0	0	115115	HCD	MS2	59.6285	50	65.3527	20388	20388	20387	0/0		1.82	3472	0.001797	0.04374	0.158
1904247_Proteos_005.RAW	AF-M	Artificial Fingerprint	High	Sequest HT	Sequest HT (A2)	A	2	Unambiguous	DYQELMNTK	DYQELMNTK		1	1	P04264	P04264	Keratin, type II cytoskeletal 1 OS=Homo sapiens OX=9606 GN=KRT1 PE=1 SV=6	0	2	2	0.4545	0	1	1	1	571.264	1141.52	1141.52	0.48	0.00027	0	0	10145812	HCD	MS2	0.500888	9.016	65.4372	20413	20413	20412	0/0		1.87	1567	0.009708	0.1119	0.012
1904247_Proteos_005.RAW	AF-M	Artificial Fingerprint	High	Sequest HT	Sequest HT (A2)	A	2	Unambiguous	IEISELNR	IEISELNR		2	2	P35908; P04264	P35908; P04264	Keratin, type II cytoskeletal 2 epidermal OS=Homo sapiens OX=9606 GN=KRT2 PE=1 SV=2; Keratin, type II cytoskeletal 1 OS=Homo sapiens OX=9606 GN=KRT1 PE=1 SV=6	0	2	2	0.1211	0	1	1	1	487.269	973.531	973.531	-0.11	-6e-05	0	0	267289	HCD	MS2	0	50	65.4871	20435	20435	20434	0/0		1.9	1017	0.0007241	0.009371	0.391
1904247_Proteos_005.RAW	AF-M	Artificial Fingerprint	High	Sequest HT	Sequest HT (A2)	A	2	Unambiguous	ESTLHLVLR	ESTLHLVLR		1	5	A0A2R8Y422	A0A2R8Y422; P62987; P62979; P0CG47; P0CG48	Uncharacterized protein OS=Homo sapiens OX=9606 PE=4 SV=1; Ubiquitin-60S ribosomal protein L40 OS=Homo sapiens OX=9606 GN=UBA52 PE=1 SV=2; Ubiquitin-40S ribosomal protein S27a OS=Homo sapiens OX=9606 GN=RPS27A PE=1 SV=2; Polyubiquitin-B OS=Homo sapiens OX=9606 GN=UBB PE=1 SV=1; Polyubiquitin-C OS=Homo sapiens OX=9606 GN=UBC PE=1 SV=3	0	2	2	0.549	0	1	1	1	534.314	1067.62	1067.62	-0.11	-6e-05	0	0	126058	HCD	MS2	42.3313	50	65.6013	20478	20478	20477	0/0		1.53	245	0.0007241	0.0161	0.309
1904247_Proteos_005.RAW	AF-M	Artificial Fingerprint	High	Sequest HT	Sequest HT (A2)	A	2	Unambiguous	VQALEEANNDLENK	VQALEEAnnDLENK	N8(Deamidated); N9(Deamidated)	1	1	P35527	P35527	Keratin, type I cytoskeletal 9 OS=Homo sapiens OX=9606 GN=KRT9 PE=1 SV=3	0	2	2	0.0979	0	1	1	1	794.873	1588.74	1588.73	3.69	0.00293	0	0	428189	HCD	MS2	36.0017	50	65.6116	20483	20483	20482	0/0		3.37	3136	0	0.0002065	0.964
1904247_Proteos_005.RAW	AF-M	Artificial Fingerprint	High	Sequest HT	Sequest HT (A2)	A	2	Unambiguous	QSVEADINGLR	QSVEADInGLR	N8(Deamidated)	1	3	P13645	Q2M2I5; P13645; P13646	Keratin, type I cytoskeletal 24 OS=Homo sapiens OX=9606 GN=KRT24 PE=1 SV=1; Keratin, type I cytoskeletal 10 OS=Homo sapiens OX=9606 GN=KRT10 PE=1 SV=6; Keratin, type I cytoskeletal 13 OS=Homo sapiens OX=9606 GN=KRT13 PE=1 SV=4	0	2	2	0.4689	0	1	1	1	601.803	1202.6	1202.6	-1.86	-0.00112	0	0	119419	HCD	MS2	0	50	65.6338	20493	20493	20490	0/0		2.09	1363	0.0007241	0.008176	0.411
1904247_Proteos_005.RAW	AF-M	Artificial Fingerprint	High	Sequest HT	Sequest HT (A2)	A	2	Unambiguous	QGVDADINGLR	QGVDADINGLR		1	1	P35527	P35527	Keratin, type I cytoskeletal 9 OS=Homo sapiens OX=9606 GN=KRT9 PE=1 SV=3	0	2	2	0.4672	0	1	1	1	579.299	1157.59	1157.59	-0.89	-0.00052	0	0	2.80087e+06	HCD	MS2	58.4808	19.855	65.6427	20496	20496	20495	0/0		3.51	1008	0.0007241	0.003677	0.531
1904247_Proteos_005.RAW	AF-M	Artificial Fingerprint	High	Sequest HT	Sequest HT (A2)	A	2	Unambiguous	NVQDAIADAEQR	NVQDAIADAEQR		1	1	P35908	P35908	Keratin, type II cytoskeletal 2 epidermal OS=Homo sapiens OX=9606 GN=KRT2 PE=1 SV=2	0	2	2	0.2923	0	1	1	1	665.323	1329.64	1329.64	-0.09	-6e-05	0	0	462969	HCD	MS2	0	50	65.7908	20538	20538	20536	0/0		1.95	1804	0.0007241	0.02472	0.244
1904247_Proteos_005.RAW	AF-M	Artificial Fingerprint	High	Sequest HT	Sequest HT (A2)	A	2	Unambiguous	QGVDADINGLR	QGVDADINGLR		1	1	P35527	P35527	Keratin, type I cytoskeletal 9 OS=Homo sapiens OX=9606 GN=KRT9 PE=1 SV=3	0	2	2	0.5049	0	1	1	1	579.299	1157.59	1157.59	-0.58	-0.00033	0	0	8809186	HCD	MS2	3.84176	9.167	65.8366	20555	20555	20553	0/0		3.09	1019	0.0007241	0.004382	0.505
1904247_Proteos_005.RAW	AF-M	Artificial Fingerprint	High	Sequest HT	Sequest HT (A2)	A	2	Unambiguous	TEELNKEVASNSELVQSSR	TEELNKEVASNSELVQSSR		1	1	P08779	P08779	Keratin, type I cytoskeletal 16 OS=Homo sapiens OX=9606 GN=KRT16 PE=1 SV=4	1	3	3	0.4711	0	1	1	1	707.354	2120.05	2120.05	0.85	0.0006	0	0	96315.4	HCD	MS2	0	50	65.8443	20558	20558	20557	0/0		2.25	4136	0.0007241	0.009063	0.396
1904247_Proteos_005.RAW	AF-M	Artificial Fingerprint	High	Sequest HT	Sequest HT (A2)	A	2	Unambiguous	GGSGGSHGGGSGFGGESGGSYGGGEEASGSGGGYGGGSGK	GGSGGSHGGGSGFGGESGGSYGGGEEASGSGGGYGGGSGK		1	1	P35527	P35527	Keratin, type I cytoskeletal 9 OS=Homo sapiens OX=9606 GN=KRT9 PE=1 SV=3	0	3	3	0.5791	0	1	1	1	1075.1	3223.28	3223.28	0.38	0.00041	0	0	253524	HCD	MS2	2.00162	50	65.8749	20567	20567	20566	0/0		4.11	4047	0	2.25e-05	1.297
1904247_Proteos_005.RAW	AF-M	Artificial Fingerprint	High	Sequest HT	Sequest HT (A2)	A	2	Unambiguous	NVQDAIADAEQR	NVQDAIADAEQR		1	1	P35908	P35908	Keratin, type II cytoskeletal 2 epidermal OS=Homo sapiens OX=9606 GN=KRT2 PE=1 SV=2	0	3	3	0.3333	0	1	1	1	443.885	1329.64	1329.64	0.24	0.00011	0	0	1.8133e+06	HCD	MS2	0.960187	31.094	66.0113	20610	20610	20609	0/0		2.16	1816	0.0007241	0.008696	0.402
1904247_Proteos_005.RAW	AF-M	Artificial Fingerprint	High	Sequest HT	Sequest HT (A2)	A	2	Unambiguous	MTLDDFR	mTLDDFR	M1(Oxidation)	1	1	P35527	P35527	Keratin, type I cytoskeletal 9 OS=Homo sapiens OX=9606 GN=KRT9 PE=1 SV=3	0	2	2	0.4638	0	1	1	1	457.208	913.408	913.408	0.04	2e-05	0	0	1.14455e+06	HCD	MS2	4.29197	50	66.0485	20625	20625	20624	0/0		2.07	892	0.0007241	0.01925	0.282
1904247_Proteos_005.RAW	AF-M	Artificial Fingerprint	High	Sequest HT	Sequest HT (A2)	A	2	Unambiguous	QVLDNLTMEK	QVLDNLTmEK	M8(Oxidation)	1	1	P35527	P35527	Keratin, type I cytoskeletal 9 OS=Homo sapiens OX=9606 GN=KRT9 PE=1 SV=3	0	2	2	0.4189	0	1	1	1	603.805	1206.6	1206.6	-0.12	-7e-05	0	0	502818	HCD	MS2	13.9628	50	66.0683	20634	20634	20633	0/0		2.22	1350	0.0007241	0.01363	0.334
1904247_Proteos_005.RAW	AF-M	Artificial Fingerprint	High	Sequest HT	Sequest HT (A2)	A	2	Unambiguous	IRLENEIQTYR	IRLENEIQTYR		1	1	P13645	P13645	Keratin, type I cytoskeletal 10 OS=Homo sapiens OX=9606 GN=KRT10 PE=1 SV=6	1	2	2	0.4929	0	1	1	1	717.889	1434.77	1434.77	-0.09	-6e-05	0	0	3.15888e+06	HCD	MS2	0	36.941	66.1075	20645	20645	20644	0/0		4.2	1071	0	0.003099	0.557
1904247_Proteos_005.RAW	AF-M	Artificial Fingerprint	High	Sequest HT	Sequest HT (A2)	A	2	Unambiguous	VQALEEANNDLENK	VQALEEANnDLENK	N9(Deamidated)	1	1	P35527	P35527	Keratin, type I cytoskeletal 9 OS=Homo sapiens OX=9606 GN=KRT9 PE=1 SV=3	0	3	3	0.1486	0	1	1	1	529.922	1587.75	1587.75	0.54	0.00028	0	0	798283	HCD	MS2	5.16561	50	66.2009	20674	20674	20673	0/0		2.49	2878	0.0007241	0.004333	0.507
1904247_Proteos_005.RAW	AF-M	Artificial Fingerprint	High	Sequest HT	Sequest HT (A2)	A	2	Unambiguous	ALEEANADLEVK	ALEEANADLEVK		2	4	P02533; P08779	P02533; P19012; P13646; P08779	Keratin, type I cytoskeletal 14 OS=Homo sapiens OX=9606 GN=KRT14 PE=1 SV=4; Keratin, type I cytoskeletal 15 OS=Homo sapiens OX=9606 GN=KRT15 PE=1 SV=3; Keratin, type I cytoskeletal 13 OS=Homo sapiens OX=9606 GN=KRT13 PE=1 SV=4; Keratin, type I cytoskeletal 16 OS=Homo sapiens OX=9606 GN=KRT16 PE=1 SV=4	0	2	2	0.4046	0	1	1	1	651.333	1301.66	1301.66	0.97	0.00063	0	0	372645	HCD	MS2	3.67233	50	66.2137	20678	20678	20677	0/0		2.62	1458	0	0.001704	0.647
1904247_Proteos_005.RAW	AF-M	Artificial Fingerprint	High	Sequest HT	Sequest HT (A2)	A	2	Unambiguous	EYQELMNVK	EYQELMNVK		2	4	P04259; A0A0S2Z428	P04259; A0A0S2Z428; P48668; P05787	Keratin, type II cytoskeletal 6B OS=Homo sapiens OX=9606 GN=KRT6B PE=1 SV=5; HCG2039812 OS=Homo sapiens (Human) OX=9606 GN=KRT6A hCG_2039812; Keratin, type II cytoskeletal 6C OS=Homo sapiens OX=9606 GN=KRT6C PE=1 SV=3; Keratin, type II cytoskeletal 8 OS=Homo sapiens OX=9606 GN=KRT8 PE=1 SV=7	0	2	2	0.3436	0	1	1	1	577.282	1153.56	1153.56	0.36	0.00021	0	0	540736	HCD	MS2	1.26629	50	66.3608	20717	20717	20715	0/0		1.95	1563	0.003126	0.07014	0.085
1904247_Proteos_005.RAW	AF-M	Artificial Fingerprint	High	Sequest HT	Sequest HT (A2)	A	2	Unambiguous	DYQELMNTK	DYQELMNTK		1	1	P04264	P04264	Keratin, type II cytoskeletal 1 OS=Homo sapiens OX=9606 GN=KRT1 PE=1 SV=6	0	2	2	0.4208	0	1	1	1	571.263	1141.52	1141.52	0.16	9e-05	0	0	1.02911e+06	HCD	MS2	5.5331	50	66.4438	20737	20737	20736	0/0		2.02	1567	0.001797	0.03316	0.2
1904247_Proteos_005.RAW	AF-M	Artificial Fingerprint	High	Sequest HT	Sequest HT (A2)	A	2	Unambiguous	LAFYNPGR	LAFYNPGR		1	1	Q8IW75	Q8IW75	Serpin A12 OS=Homo sapiens OX=9606 GN=SERPINA12 PE=1 SV=1	0	2	2	0.5068	0	1	1	1	469.248	937.489	937.489	0.3	0.00014	0	0	75998.7	HCD	MS2	13.1424	50	66.49	20753	20753	20752	0/0		1.46	674	0.001797	0.03979	0.172
1904247_Proteos_005.RAW	AF-M	Artificial Fingerprint	High	Sequest HT	Sequest HT (A2)	A	2	Selected	YEELQITAGR	YEELQITAGR		2	2	P04264; P04259	P04264; P04259	Keratin, type II cytoskeletal 1 OS=Homo sapiens OX=9606 GN=KRT1 PE=1 SV=6; Keratin, type II cytoskeletal 6B OS=Homo sapiens OX=9606 GN=KRT6B PE=1 SV=5	0	2	2	0	0	1	1	1	590.304	1179.6	1179.6	0.17	0.0001	0	0	715666	HCD	MS2	3.97	50	66.5802	20781	20781	20780	0/0		2.45	1165	0.0007241	0.004598	0.498
1904247_Proteos_005.RAW	AF-M	Artificial Fingerprint	High	Sequest HT	Sequest HT (A2)	A	2	Rejected	YQELQITAGR	YqELQITAGR	Q2(Deamidated)	0	1		Q7Z794	Keratin, type II cytoskeletal 1b OS=Homo sapiens OX=9606 GN=KRT77 PE=2 SV=3	0	2	2		0	2	2	2	590.304	1179.6	1179.6	0.17	0.0001	0	0	715666	HCD	MS2	3.97	50	66.5802	20781	20781	20780	0/0		2.45	1165	0.0007241	0.004598	0.498
1904247_Proteos_005.RAW	AF-M	Artificial Fingerprint	High	Sequest HT	Sequest HT (A2)	A	2	Unambiguous	VQALEEANNDLENK	VQALEEANnDLENK	N9(Deamidated)	1	1	P35527	P35527	Keratin, type I cytoskeletal 9 OS=Homo sapiens OX=9606 GN=KRT9 PE=1 SV=3	0	2	2	0.0243	0	1	1	1	794.379	1587.75	1587.75	0.08	7e-05	0	0	1.55176e+06	HCD	MS2	3.14736	50	66.6137	20790	20790	20789	0/0		3.7	2939	0	0.0002184	0.955
1904247_Proteos_005.RAW	AF-M	Artificial Fingerprint	High	Sequest HT	Sequest HT (A2)	A	2	Unambiguous	VQALEEANNDLENK	VQALEEAnNDLENK	N8(Deamidated)	1	1	P35527	P35527	Keratin, type I cytoskeletal 9 OS=Homo sapiens OX=9606 GN=KRT9 PE=1 SV=3	0	2	2		0.0243	2	2	2	794.379	1587.75	1587.75	0.08	7e-05	0	0	1.55176e+06	HCD	MS2	3.14736	50	66.6137	20790	20790	20789	0/0		3.61	2939	0	0.0002372	0.943
1904247_Proteos_005.RAW	AF-M	Artificial Fingerprint	High	Sequest HT	Sequest HT (A2)	A	2	Unambiguous	QGVDADINGLR	QGVDADInGLR	N8(Deamidated)	1	1	P35527	P35527	Keratin, type I cytoskeletal 9 OS=Homo sapiens OX=9606 GN=KRT9 PE=1 SV=3	0	2	2	0.3098	0	1	1	1	579.791	1158.57	1158.57	-0.06	-3e-05	0	0	1632563	HCD	MS2	9.89883	40.779	66.6491	20800	20800	20799	0/0		3.26	1263	0	0.003193	0.552
1904247_Proteos_005.RAW	AF-M	Artificial Fingerprint	High	Sequest HT	Sequest HT (A2)	A	2	Rejected	YQELQITAGR	YQELqITAGR	Q5(Deamidated)	0	1		Q7Z794	Keratin, type II cytoskeletal 1b OS=Homo sapiens OX=9606 GN=KRT77 PE=2 SV=3	0	2	2	0.0175	0	1	1	1	590.304	1179.6	1179.6	0.59	0.00035	0	0	139453440	HCD	MS2	3.01113	50	66.7591	20844	20844	20843	0/0		2.29	1165	0.009708	0.1085	0.017
1904247_Proteos_005.RAW	AF-M	Artificial Fingerprint	High	Sequest HT	Sequest HT (A2)	A	2	Selected	YEELQITAGR	YEELQITAGR		2	2	P04264; P04259	P04264; P04259	Keratin, type II cytoskeletal 1 OS=Homo sapiens OX=9606 GN=KRT1 PE=1 SV=6; Keratin, type II cytoskeletal 6B OS=Homo sapiens OX=9606 GN=KRT6B PE=1 SV=5	0	2	2		0.0175	2	2	2	590.304	1179.6	1179.6	0.59	0.00035	0	0	139453440	HCD	MS2	3.01113	50	66.7591	20844	20844	20843	0/0		2.25	1165	0.004031	0.07293	0.079
1904247_Proteos_005.RAW	AF-M	Artificial Fingerprint	High	Sequest HT	Sequest HT (A2)	A	2	Rejected	YQELQITAGR	YqELQITAGR	Q2(Deamidated)	0	1		Q7Z794	Keratin, type II cytoskeletal 1b OS=Homo sapiens OX=9606 GN=KRT77 PE=2 SV=3	0	2	2		0.0175	3	3	3	590.304	1179.6	1179.6	0.59	0.00035	0	0	139453440	HCD	MS2	3.01113	50	66.7591	20844	20844	20843	0/0		2.25	1165	0.004031	0.07293	0.079
1904247_Proteos_005.RAW	AF-M	Artificial Fingerprint	High	Sequest HT	Sequest HT (A2)	A	2	Unambiguous	IKFEMEQNLR	IKFEMEQNLR		1	1	P35527	P35527	Keratin, type I cytoskeletal 9 OS=Homo sapiens OX=9606 GN=KRT9 PE=1 SV=3	1	3	3	0.2617	0	1	1	1	436.564	1307.68	1307.68	-0.43	-0.00019	0	0	509881	HCD	MS2	21.589	50	66.7617	20846	20846	20843	0/0		1.49	1205	0.002625	0.05978	0.11
1904247_Proteos_005.RAW	AF-M	Artificial Fingerprint	High	Sequest HT	Sequest HT (A2)	A	2	Unambiguous	NVQDAIADAEQR	NVQDAIADAEQR		1	1	P35908	P35908	Keratin, type II cytoskeletal 2 epidermal OS=Homo sapiens OX=9606 GN=KRT2 PE=1 SV=2	0	2	2	0.521	0	1	1	1	665.323	1329.64	1329.64	-0.46	-0.00031	0	0	1.60858e+06	HCD	MS2	0	50	66.7983	20860	20860	20859	0/0		3.09	1774	0	0.003088	0.557
1904247_Proteos_005.RAW	AF-M	Artificial Fingerprint	High	Sequest HT	Sequest HT (A2)	A	2	Unambiguous	IRLENEIQTYR	IRLENEIQTYR		1	1	P13645	P13645	Keratin, type I cytoskeletal 10 OS=Homo sapiens OX=9606 GN=KRT10 PE=1 SV=6	1	3	3	0.3652	0	1	1	1	478.928	1434.77	1434.77	-0.01	-1e-05	0	0	586926	HCD	MS2	15.2057	50	67.0399	20944	20944	20943	0/0		2.3	1071	0.001797	0.0397	0.173
1904247_Proteos_005.RAW	AF-M	Artificial Fingerprint	High	Sequest HT	Sequest HT (A2)	A	2	Unambiguous	MTLDDFR	mTLDDFR	M1(Oxidation)	1	1	P35527	P35527	Keratin, type I cytoskeletal 9 OS=Homo sapiens OX=9606 GN=KRT9 PE=1 SV=3	0	2	2	0.4532	0	1	1	1	457.208	913.408	913.408	-0.22	-0.0001	0	0	1.09847e+06	HCD	MS2	0	50	67.0521	20947	20947	20946	0/0		2.03	893	0.0007241	0.01615	0.309
1904247_Proteos_005.RAW	AF-M	Artificial Fingerprint	High	Sequest HT	Sequest HT (A2)	A	2	Unambiguous	QVLDNLTMEK	QVLDNLTmEK	M8(Oxidation)	1	1	P35527	P35527	Keratin, type I cytoskeletal 9 OS=Homo sapiens OX=9606 GN=KRT9 PE=1 SV=3	0	2	2	0.3839	0	1	1	1	603.805	1206.6	1206.6	-0.53	-0.00032	0	0	1.37241e+06	HCD	MS2	0	50	67.0786	20956	20956	20955	0/0		2.11	1392	0.002625	0.0592	0.112
1904247_Proteos_005.RAW	AF-M	Artificial Fingerprint	High	Sequest HT	Sequest HT (A2)	A	2	Unambiguous	NMQDMVEDYR	NmQDMVEDYR	M2(Oxidation)	1	1	P04264	P04264	Keratin, type II cytoskeletal 1 OS=Homo sapiens OX=9606 GN=KRT1 PE=1 SV=6	0	2	2	0.0845	0	1	1	1	658.767	1316.53	1316.52	2.15	0.00141	0	0	131886	HCD	MS2	27.3971	50	67.1156	20970	20970	20969	0/0		1.42	1142	0.0007241	0.01007	0.38
1904247_Proteos_005.RAW	AF-M	Artificial Fingerprint	High	Sequest HT	Sequest HT (A2)	A	2	Unambiguous	TNAENEFVTIK	TNAEnEFVTIK	N5(Deamidated)	1	1	P04264	P04264	Keratin, type II cytoskeletal 1 OS=Homo sapiens OX=9606 GN=KRT1 PE=1 SV=6	0	2	2	0.2261	0	1	1	1	633.814	1266.62	1266.62	-0.35	-0.00022	0	0	14318931	HCD	MS2	0.31774	8.297	67.1396	20979	20979	20978	0/0		2.61	1537	0.0007241	0.0249	0.243
1904247_Proteos_005.RAW	AF-M	Artificial Fingerprint	High	Sequest HT	Sequest HT (A2)	A	2	Unambiguous	FLEQQNQVLQTK	FLEQQNQVLQTK		2	3	P35908; P04264	Q7Z794; P35908; P04264	Keratin, type II cytoskeletal 1b OS=Homo sapiens OX=9606 GN=KRT77 PE=2 SV=3; Keratin, type II cytoskeletal 2 epidermal OS=Homo sapiens OX=9606 GN=KRT2 PE=1 SV=2; Keratin, type II cytoskeletal 1 OS=Homo sapiens OX=9606 GN=KRT1 PE=1 SV=6	0	2	2	0.3894	0	1	1	1	738.396	1475.78	1475.79	-0.87	-0.00064	0	0	628626	HCD	MS2	10.1128	50	67.1423	20981	20981	20978	0/0		2.26	1268	0.0007241	0.01217	0.351
1904247_Proteos_005.RAW	AF-M	Artificial Fingerprint	High	Sequest HT	Sequest HT (A2)	A	2	Selected	YEELQITAGR	YEELQITAGR		2	2	P04264; P04259	P04264; P04259	Keratin, type II cytoskeletal 1 OS=Homo sapiens OX=9606 GN=KRT1 PE=1 SV=6; Keratin, type II cytoskeletal 6B OS=Homo sapiens OX=9606 GN=KRT6B PE=1 SV=5	0	2	2	0	0	1	1	1	590.305	1179.6	1179.6	1.52	0.0009	0	0	51913632	HCD	MS2	0.416396	1.531	67.5811	21137	21137	21136	0/0		2.42	1185	0.0007241	0.007855	0.417
1904247_Proteos_005.RAW	AF-M	Artificial Fingerprint	High	Sequest HT	Sequest HT (A2)	A	2	Rejected	YQELQITAGR	YqELQITAGR	Q2(Deamidated)	0	1		Q7Z794	Keratin, type II cytoskeletal 1b OS=Homo sapiens OX=9606 GN=KRT77 PE=2 SV=3	0	2	2		0	2	2	2	590.305	1179.6	1179.6	1.52	0.0009	0	0	51913632	HCD	MS2	0.416396	1.531	67.5811	21137	21137	21136	0/0		2.42	1185	0.0007241	0.007855	0.417
1904247_Proteos_005.RAW	AF-M	Artificial Fingerprint	High	Sequest HT	Sequest HT (A2)	A	2	Unambiguous	VQALEEANNDLENK	VQALEEANnDLENK	N9(Deamidated)	1	1	P35527	P35527	Keratin, type I cytoskeletal 9 OS=Homo sapiens OX=9606 GN=KRT9 PE=1 SV=3	0	2	2	0.0212	0	1	1	1	794.379	1587.75	1587.75	1.24	0.00098	0	0	482884	HCD	MS2	6.56274	50	67.6231	21150	21150	21149	0/0		3.3	2892	0	0.001093	0.713
1904247_Proteos_005.RAW	AF-M	Artificial Fingerprint	High	Sequest HT	Sequest HT (A2)	A	2	Unambiguous	VQALEEANNDLENK	VQALEEAnNDLENK	N8(Deamidated)	1	1	P35527	P35527	Keratin, type I cytoskeletal 9 OS=Homo sapiens OX=9606 GN=KRT9 PE=1 SV=3	0	2	2		0.0212	2	2	2	794.379	1587.75	1587.75	1.24	0.00098	0	0	482884	HCD	MS2	6.56274	50	67.6231	21150	21150	21149	0/0		3.23	2892	0	0.001212	0.698
1904247_Proteos_005.RAW	AF-M	Artificial Fingerprint	High	Sequest HT	Sequest HT (A2)	A	2	Unambiguous	QGVDADINGLR	QGVDADInGLR	N8(Deamidated)	1	1	P35527	P35527	Keratin, type I cytoskeletal 9 OS=Homo sapiens OX=9606 GN=KRT9 PE=1 SV=3	0	2	2	0.4205	0	1	1	1	579.792	1158.58	1158.57	1.21	0.0007	0	0	1.23285e+06	HCD	MS2	3.49421	50	67.6525	21161	21161	21160	0/0		3.02	1262	0	0.002368	0.597
1904247_Proteos_005.RAW	AF-M	Artificial Fingerprint	High	Sequest HT	Sequest HT (A2)	A	2	Unambiguous	TNAENEFVTIK	TNAENEFVTIK		1	1	P04264	P04264	Keratin, type II cytoskeletal 1 OS=Homo sapiens OX=9606 GN=KRT1 PE=1 SV=6	0	2	2	0.367	0	1	1	1	633.323	1265.64	1265.64	0.52	0.00033	0	0	2.98236e+06	HCD	MS2	48.066	29.798	67.6601	21164	21164	21162	0/0		2.97	1461	0.0007241	0.003633	0.533
1904247_Proteos_005.RAW	AF-M	Artificial Fingerprint	High	Sequest HT	Sequest HT (A2)	A	2	Unambiguous	TEELNKEVASNSELVQSSR	TEELnKEVASNSELVQSSR	N5(Deamidated)	1	1	P08779	P08779	Keratin, type I cytoskeletal 16 OS=Homo sapiens OX=9606 GN=KRT16 PE=1 SV=4	1	3	3	0.1832	0	1	1	1	707.685	2121.04	2121.03	3.95	0.00279	0	0	83242.2	HCD	MS2	60.6384	50	67.6722	21169	21169	21167	0/0		1.31	4646	0.004031	0.07292	0.079
1904247_Proteos_005.RAW	AF-M	Artificial Fingerprint	High	Sequest HT	Sequest HT (A2)	A	2	Unambiguous	IKFEMEQNLR	IKFEMEQNLR		1	1	P35527	P35527	Keratin, type I cytoskeletal 9 OS=Homo sapiens OX=9606 GN=KRT9 PE=1 SV=3	1	2	2	0.3244	0	1	1	1	654.343	1307.68	1307.68	0.58	0.00038	0	0	11362981	HCD	MS2	0.166379	11.697	67.7481	21196	21196	21195	0/0		2.62	1166	0.0007241	0.01087	0.368
1904247_Proteos_005.RAW	AF-M	Artificial Fingerprint	High	Sequest HT	Sequest HT (A2)	A	2	Unambiguous	IKFEMEQNLR	IKFEMEQNLR		1	1	P35527	P35527	Keratin, type I cytoskeletal 9 OS=Homo sapiens OX=9606 GN=KRT9 PE=1 SV=3	1	3	3	0.2588	0	1	1	1	436.565	1307.68	1307.68	1.46	0.00064	0	0	58132888	HCD	MS2	0.131193	0.995	67.7762	21206	21206	21205	0/0		2.28	1141	0.009708	0.1089	0.017
1904247_Proteos_005.RAW	AF-M	Artificial Fingerprint	High	Sequest HT	Sequest HT (A2)	A	2	Unambiguous	NVQDAIADAEQR	NVQDAIADAEQR		1	1	P35908	P35908	Keratin, type II cytoskeletal 2 epidermal OS=Homo sapiens OX=9606 GN=KRT2 PE=1 SV=2	0	2	2	0.2969	0	1	1	1	665.324	1329.64	1329.64	1.01	0.00067	0	0	270809	HCD	MS2	9.35527	50	67.8042	21217	21217	21216	0/0		1.92	1822	0.0007241	0.01673	0.303
1904247_Proteos_005.RAW	AF-M	Artificial Fingerprint	High	Sequest HT	Sequest HT (A2)	A	2	Unambiguous	GGSGGSHGGGSGFGGESGGSYGGGEEASGSGGGYGGGSGK	GGSGGSHGGGSGFGGESGGSYGGGEEASGSGGGYGGGSGK		1	1	P35527	P35527	Keratin, type I cytoskeletal 9 OS=Homo sapiens OX=9606 GN=KRT9 PE=1 SV=3	0	3	3	0.5556	0	1	1	1	1075.1	3223.28	3223.28	0.73	0.00078	0	0	161541	HCD	MS2	0	50	67.8855	21247	21247	21246	0/0		3.51	4141	0	0.0005612	0.814
1904247_Proteos_005.RAW	AF-M	Artificial Fingerprint	High	Sequest HT	Sequest HT (A2)	A	2	Unambiguous	IRLENEIQTYR	IRLENEIQTYR		1	1	P13645	P13645	Keratin, type I cytoskeletal 10 OS=Homo sapiens OX=9606 GN=KRT10 PE=1 SV=6	1	3	3	0.4022	0	1	1	1	478.928	1434.77	1434.77	-0.27	-0.00013	0	0	214051	HCD	MS2	32.9459	50	68.0455	21304	21304	21303	0/0		1.79	1086	0.001797	0.03992	0.172
1904247_Proteos_005.RAW	AF-M	Artificial Fingerprint	High	Sequest HT	Sequest HT (A2)	A	2	Unambiguous	MTLDDFR	mTLDDFR	M1(Oxidation)	1	1	P35527	P35527	Keratin, type I cytoskeletal 9 OS=Homo sapiens OX=9606 GN=KRT9 PE=1 SV=3	0	2	2	0.4478	0	1	1	1	457.208	913.408	913.408	0.11	5e-05	0	0	961952	HCD	MS2	17.2136	50	68.0558	21309	21309	21308	0/0		2.01	973	0.0007241	0.01942	0.281
1904247_Proteos_005.RAW	AF-M	Artificial Fingerprint	High	Sequest HT	Sequest HT (A2)	A	2	Unambiguous	QVLDNLTMEK	QVLDNLTmEK	M8(Oxidation)	1	1	P35527	P35527	Keratin, type I cytoskeletal 9 OS=Homo sapiens OX=9606 GN=KRT9 PE=1 SV=3	0	2	2	0.3686	0	1	1	1	603.806	1206.6	1206.6	0.99	0.0006	0	0	1.20164e+06	HCD	MS2	0	50	68.0831	21320	21320	21319	0/0		2.55	1340	0.001797	0.03102	0.21
1904247_Proteos_005.RAW	AF-M	Artificial Fingerprint	High	Sequest HT	Sequest HT (A2)	A	2	Unambiguous	NMQDMVEDYR	NmQDMVEDYR	M2(Oxidation)	1	1	P04264	P04264	Keratin, type II cytoskeletal 1 OS=Homo sapiens OX=9606 GN=KRT1 PE=1 SV=6	0	2	2	0.3208	0	1	1	1	658.766	1316.52	1316.52	-0.17	-0.00011	0	0	661637	HCD	MS2	0	50	68.1244	21332	21332	21331	0/0		2.4	1131	0.0007241	0.004518	0.5
1904247_Proteos_005.RAW	AF-M	Artificial Fingerprint	High	Sequest HT	Sequest HT (A2)	A	2	Unambiguous	VSLAGACGVGGYGSR	VSLAGAcGVGGYGSR	C7(Carbamidomethyl)	1	1	P13647	P13647	Keratin, type II cytoskeletal 5 OS=Homo sapiens OX=9606 GN=KRT5 PE=1 SV=3	0	2	2	0.4577	0	1	1	1	705.843	1410.68	1410.68	-1.08	-0.00076	0	0	151725	HCD	MS2	8.1846	50	68.5365	21467	21467	21466	0/0		2.01	2302	0.008344	0.1004	0.029
1904247_Proteos_005.RAW	AF-M	Artificial Fingerprint	High	Sequest HT	Sequest HT (A2)	A	2	Rejected	YQELQITAGR	YqELQITAGR	Q2(Deamidated)	0	1		Q7Z794	Keratin, type II cytoskeletal 1b OS=Homo sapiens OX=9606 GN=KRT77 PE=2 SV=3	0	2	2	0	0	1	1	1	590.304	1179.6	1179.6	0.59	0.00035	0	0	4975505	HCD	MS2	1.53256	16.695	68.5879	21480	21480	21479	0/0		2.42	1165	0.0007241	0.01031	0.376
1904247_Proteos_005.RAW	AF-M	Artificial Fingerprint	High	Sequest HT	Sequest HT (A2)	A	2	Selected	YEELQITAGR	YEELQITAGR		2	2	P04264; P04259	P04264; P04259	Keratin, type II cytoskeletal 1 OS=Homo sapiens OX=9606 GN=KRT1 PE=1 SV=6; Keratin, type II cytoskeletal 6B OS=Homo sapiens OX=9606 GN=KRT6B PE=1 SV=5	0	2	2		0	2	2	2	590.304	1179.6	1179.6	0.59	0.00035	0	0	4975505	HCD	MS2	1.53256	16.695	68.5879	21480	21480	21479	0/0		2.42	1165	0.0007241	0.01031	0.376
1904247_Proteos_005.RAW	AF-M	Artificial Fingerprint	High	Sequest HT	Sequest HT (A2)	A	2	Unambiguous	VQALEEANNDLENK	VQALEEANnDLENK	N9(Deamidated)	1	1	P35527	P35527	Keratin, type I cytoskeletal 9 OS=Homo sapiens OX=9606 GN=KRT9 PE=1 SV=3	0	2	2	0.0151	0	1	1	1	794.382	1587.76	1587.75	3.93	0.00312	0	0	240168	HCD	MS2	7.86505	50	68.6273	21493	21493	21492	0/0		3.32	2989	0	0.001169	0.703
1904247_Proteos_005.RAW	AF-M	Artificial Fingerprint	High	Sequest HT	Sequest HT (A2)	A	2	Unambiguous	VQALEEANNDLENK	VQALEEAnNDLENK	N8(Deamidated)	1	1	P35527	P35527	Keratin, type I cytoskeletal 9 OS=Homo sapiens OX=9606 GN=KRT9 PE=1 SV=3	0	2	2		0.0151	2	2	2	794.382	1587.76	1587.75	3.93	0.00312	0	0	240168	HCD	MS2	7.86505	50	68.6273	21493	21493	21492	0/0		3.27	2989	0	0.001247	0.694
1904247_Proteos_005.RAW	AF-M	Artificial Fingerprint	High	Sequest HT	Sequest HT (A2)	A	2	Unambiguous	QGVDADINGLR	QGVDADInGLR	N8(Deamidated)	1	1	P35527	P35527	Keratin, type I cytoskeletal 9 OS=Homo sapiens OX=9606 GN=KRT9 PE=1 SV=3	0	2	2	0.4776	0	1	1	1	579.792	1158.58	1158.57	0.68	0.00039	0	0	957903	HCD	MS2	1.90006	50	68.6555	21501	21501	21500	0/0		3.12	1266	0	0.000599	0.804
1904247_Proteos_005.RAW	AF-M	Artificial Fingerprint	High	Sequest HT	Sequest HT (A2)	A	2	Unambiguous	TNAENEFVTIK	TNAENEFVTIK		1	1	P04264	P04264	Keratin, type II cytoskeletal 1 OS=Homo sapiens OX=9606 GN=KRT1 PE=1 SV=6	0	2	2	0.4494	0	1	1	1	633.323	1265.64	1265.64	1.1	0.0007	0	0	27425802	HCD	MS2	0.131264	3.829	68.6696	21505	21505	21504	0/0		3.16	1479	0.0007241	0.02464	0.245
1904247_Proteos_005.RAW	AF-M	Artificial Fingerprint	High	Sequest HT	Sequest HT (A2)	A	2	Unambiguous	TEELNKEVASNSELVQSSR	TEELNKEVASNSELVQSSR		1	1	P08779	P08779	Keratin, type I cytoskeletal 16 OS=Homo sapiens OX=9606 GN=KRT16 PE=1 SV=4	1	3	3	0.142	0	1	1	1	707.348	2120.03	2120.05	-8.74	-0.00618	0	0	134164	HCD	MS2	17.548	50	68.68	21510	21510	21509	0/0		1.76	4962	0.006305	0.0868	0.052
1904247_Proteos_005.RAW	AF-M	Artificial Fingerprint	High	Sequest HT	Sequest HT (A2)	A	2	Unambiguous	IKFEMEQNLR	IKFEMEQNLR		1	1	P35527	P35527	Keratin, type I cytoskeletal 9 OS=Homo sapiens OX=9606 GN=KRT9 PE=1 SV=3	1	2	2	0.3056	0	1	1	1	654.342	1307.68	1307.68	0.02	1e-05	0	0	2.28781e+06	HCD	MS2	0.367227	50	68.7497	21531	21531	21530	0/0		2.52	1177	0.0007241	0.01177	0.356
1904247_Proteos_005.RAW	AF-M	Artificial Fingerprint	High	Sequest HT	Sequest HT (A2)	A	2	Unambiguous	IKFEMEQNLR	IKFEMEQNLR		1	1	P35527	P35527	Keratin, type I cytoskeletal 9 OS=Homo sapiens OX=9606 GN=KRT9 PE=1 SV=3	1	3	3	0.2596	0	1	1	1	436.564	1307.68	1307.68	0.76	0.00033	0	0	12133052	HCD	MS2	0.640738	5.222	68.7815	21542	21542	21541	0/0		2.35	1152	0.0007241	0.01039	0.375
1904247_Proteos_005.RAW	AF-M	Artificial Fingerprint	High	Sequest HT	Sequest HT (A2)	A	2	Unambiguous	IKFEMEQNLR	IKFEmEQNLR	M5(Oxidation)	1	1	P35527	P35527	Keratin, type I cytoskeletal 9 OS=Homo sapiens OX=9606 GN=KRT9 PE=1 SV=3	1	3	3	0.1971	0	1	1	2	441.896	1323.67	1323.67	-0.23	-0.0001	0	0	256348	HCD	MS2	5.05526	50	68.7909	21546	21546	21545	0/0		1.37	1467	0.005861	0.08542	0.055
1904247_Proteos_005.RAW	AF-M	Artificial Fingerprint	High	Sequest HT	Sequest HT (A2)	A	2	Unambiguous	NVQDAIADAEQR	NVQDAIADAEQR		1	1	P35908	P35908	Keratin, type II cytoskeletal 2 epidermal OS=Homo sapiens OX=9606 GN=KRT2 PE=1 SV=2	0	2	2	0.3132	0	1	1	1	665.324	1329.64	1329.64	1.1	0.00073	0	0	91915.7	HCD	MS2	21.0842	50	68.8082	21551	21551	21550	0/0		1.82	1799	0.0007241	0.02407	0.248
1904247_Proteos_005.RAW	AF-M	Artificial Fingerprint	High	Sequest HT	Sequest HT (A2)	A	2	Unambiguous	GGSGGSHGGGSGFGGESGGSYGGGEEASGSGGGYGGGSGK	GGSGGSHGGGSGFGGESGGSYGGGEEASGSGGGYGGGSGK		1	1	P35527	P35527	Keratin, type I cytoskeletal 9 OS=Homo sapiens OX=9606 GN=KRT9 PE=1 SV=3	0	3	3	0.557	0	1	1	1	1075.1	3223.28	3223.28	0.04	5e-05	0	0	126931	HCD	MS2	0	50	68.8869	21572	21572	21571	0/0		3.77	3886	0	0.0007029	0.78
1904247_Proteos_005.RAW	AF-M	Artificial Fingerprint	High	Sequest HT	Sequest HT (A2)	A	2	Unambiguous	IRLENEIQTYR	IRLEnEIQTYR	N5(Deamidated)	1	1	P13645	P13645	Keratin, type I cytoskeletal 10 OS=Homo sapiens OX=9606 GN=KRT10 PE=1 SV=6	1	3	3	0.1705	0	1	1	1	479.256	1435.75	1435.75	0.36	0.00017	0	0	678412	HCD	MS2	7.01372	50	69.0494	21612	21612	21611	0/0		2.64	1328	0.002625	0.06461	0.098
1904247_Proteos_005.RAW	AF-M	Artificial Fingerprint	High	Sequest HT	Sequest HT (A2)	A	2	Unambiguous	MTLDDFR	mTLDDFR	M1(Oxidation)	1	1	P35527	P35527	Keratin, type I cytoskeletal 9 OS=Homo sapiens OX=9606 GN=KRT9 PE=1 SV=3	0	2	2	0.466	0	1	1	1	457.208	913.409	913.408	0.18	8e-05	0	0	785841	HCD	MS2	2.21838	50	69.0638	21616	21616	21615	0/0		2.06	971	0.0007241	0.02138	0.266
1904247_Proteos_005.RAW	AF-M	Artificial Fingerprint	High	Sequest HT	Sequest HT (A2)	A	2	Unambiguous	QVLDNLTMEK	QVLDNLTmEK	M8(Oxidation)	1	1	P35527	P35527	Keratin, type I cytoskeletal 9 OS=Homo sapiens OX=9606 GN=KRT9 PE=1 SV=3	0	2	2	0.4106	0	1	1	1	603.806	1206.6	1206.6	0.28	0.00017	0	0	1.05822e+06	HCD	MS2	0	50	69.0877	21624	21624	21623	0/0		2.63	1344	0.001406	0.02719	0.23
1904247_Proteos_005.RAW	AF-M	Artificial Fingerprint	High	Sequest HT	Sequest HT (A2)	A	2	Unambiguous	NMQDMVEDYR	NmQDMVEDYR	M2(Oxidation)	1	1	P04264	P04264	Keratin, type II cytoskeletal 1 OS=Homo sapiens OX=9606 GN=KRT1 PE=1 SV=6	0	2	2	0.1703	0	1	1	1	658.766	1316.52	1316.52	0.11	7e-05	0	0	926323	HCD	MS2	5.48362	50	69.1261	21636	21636	21635	0/0		2.29	1147	0.0007241	0.01265	0.345
1904247_Proteos_005.RAW	AF-M	Artificial Fingerprint	High	Sequest HT	Sequest HT (A2)	A	2	Rejected	YQELQITAGR	YQELqITAGR	Q5(Deamidated)	0	1		Q7Z794	Keratin, type II cytoskeletal 1b OS=Homo sapiens OX=9606 GN=KRT77 PE=2 SV=3	0	2	2	0.0124	0	1	1	1	590.304	1179.6	1179.6	0.07	4e-05	0	0	2.77475e+06	HCD	MS2	25.1725	50	69.2385	21667	21667	21666	0/0		2.41	1165	0.0007241	0.02412	0.248
1904247_Proteos_005.RAW	AF-M	Artificial Fingerprint	High	Sequest HT	Sequest HT (A2)	A	2	Rejected	YQELQITAGR	YqELQITAGR	Q2(Deamidated)	0	1		Q7Z794	Keratin, type II cytoskeletal 1b OS=Homo sapiens OX=9606 GN=KRT77 PE=2 SV=3	0	2	2		0.0124	2	2	2	590.304	1179.6	1179.6	0.07	4e-05	0	0	2.77475e+06	HCD	MS2	25.1725	50	69.2385	21667	21667	21666	0/0		2.38	1165	0.0007241	0.01379	0.332
1904247_Proteos_005.RAW	AF-M	Artificial Fingerprint	High	Sequest HT	Sequest HT (A2)	A	2	Selected	YEELQITAGR	YEELQITAGR		2	2	P04264; P04259	P04264; P04259	Keratin, type II cytoskeletal 1 OS=Homo sapiens OX=9606 GN=KRT1 PE=1 SV=6; Keratin, type II cytoskeletal 6B OS=Homo sapiens OX=9606 GN=KRT6B PE=1 SV=5	0	2	2		0.0124	3	3	3	590.304	1179.6	1179.6	0.07	4e-05	0	0	2.77475e+06	HCD	MS2	25.1725	50	69.2385	21667	21667	21666	0/0		2.38	1165	0.0007241	0.01379	0.332
1904247_Proteos_005.RAW	AF-M	Artificial Fingerprint	High	Sequest HT	Sequest HT (A2)	A	2	Unambiguous	VQALEEANNDLENK	VQALEEANnDLENK	N9(Deamidated)	1	1	P35527	P35527	Keratin, type I cytoskeletal 9 OS=Homo sapiens OX=9606 GN=KRT9 PE=1 SV=3	0	3	3	0.0104	0	1	1	1	529.922	1587.75	1587.75	0.42	0.00022	0	0	1.47072e+06	HCD	MS2	3.3867	50	69.3987	21716	21716	21715	0/0		2.89	2939	0.0007241	0.006003	0.457
1904247_Proteos_005.RAW	AF-M	Artificial Fingerprint	High	Sequest HT	Sequest HT (A2)	A	2	Unambiguous	VQALEEANNDLENK	VQALEEAnNDLENK	N8(Deamidated)	1	1	P35527	P35527	Keratin, type I cytoskeletal 9 OS=Homo sapiens OX=9606 GN=KRT9 PE=1 SV=3	0	3	3		0.0104	2	2	2	529.922	1587.75	1587.75	0.42	0.00022	0	0	1.47072e+06	HCD	MS2	3.3867	50	69.3987	21716	21716	21715	0/0		2.86	2939	0.0007241	0.008608	0.403
1904247_Proteos_005.RAW	AF-M	Artificial Fingerprint	High	Sequest HT	Sequest HT (A2)	A	2	Unambiguous	QSVEADINGLR	QSVEADINGLR		1	3	P13645	Q2M2I5; P13645; P13646	Keratin, type I cytoskeletal 24 OS=Homo sapiens OX=9606 GN=KRT24 PE=1 SV=1; Keratin, type I cytoskeletal 10 OS=Homo sapiens OX=9606 GN=KRT10 PE=1 SV=6; Keratin, type I cytoskeletal 13 OS=Homo sapiens OX=9606 GN=KRT13 PE=1 SV=4	0	2	2	0.3497	0	1	1	1	601.312	1201.62	1201.62	0.38	0.00023	0	0	111310	HCD	MS2	37.7545	50	69.5334	21762	21762	21760	0/0		1.83	1220	0.001797	0.03973	0.173
1904247_Proteos_005.RAW	AF-M	Artificial Fingerprint	High	Sequest HT	Sequest HT (A2)	A	2	Unambiguous	VSLAGACGVGGYGSR	VSLAGAcGVGGYGSR	C7(Carbamidomethyl)	1	1	P13647	P13647	Keratin, type II cytoskeletal 5 OS=Homo sapiens OX=9606 GN=KRT5 PE=1 SV=3	0	2	2	0.5529	0	1	1	1	705.843	1410.68	1410.68	0.05	3e-05	0	0	253915	HCD	MS2	0	50	69.5412	21765	21765	21764	0/0		2.55	2163	0.0007241	0.007116	0.432
1904247_Proteos_005.RAW	AF-M	Artificial Fingerprint	High	Sequest HT	Sequest HT (A2)	A	2	Selected	FASFIDKVR	FASFIDKVR		4	17	P35908; P04259; A0A0S2Z428; P13647	Q5XKE5; P08729; Q7Z794; Q7RTS7; Q86Y46; P35908; P04259; A0A0S2Z428; Q01546; O95678; P48668; Q9NSB2; P12035; Q3SY84; Q14CN4; P05787; P13647	Keratin, type II cytoskeletal 79 OS=Homo sapiens OX=9606 GN=KRT79 PE=1 SV=2; Keratin, type II cytoskeletal 7 OS=Homo sapiens OX=9606 GN=KRT7 PE=1 SV=5; Keratin, type II cytoskeletal 1b OS=Homo sapiens OX=9606 GN=KRT77 PE=2 SV=3; Keratin, type II cytoskeletal 74 OS=Homo sapiens OX=9606 GN=KRT74 PE=1 SV=2; Keratin, type II cytoskeletal 73 OS=Homo sapiens OX=9606 GN=KRT73 PE=1 SV=1; Keratin, type II…	1	2	2	0	0	1	1	1	541.803	1082.6	1082.6	0.21	0.00011	0	0	812069	HCD	MS2	4.79534	50	69.5429	21766	21766	21764	0/0		2.31	448	0.0007241	0.01875	0.286
1904247_Proteos_005.RAW	AF-M	Artificial Fingerprint	High	Sequest HT	Sequest HT (A2)	A	2	Rejected	FASFINKVR	FASFInKVR	N6(Deamidated)	0	1		Q9NSB4	Keratin, type II cuticular Hb2 OS=Homo sapiens OX=9606 GN=KRT82 PE=3 SV=3	1	2	2		0	2	2	2	541.803	1082.6	1082.6	0.21	0.00011	0	0	812069	HCD	MS2	4.79534	50	69.5429	21766	21766	21764	0/0		2.31	448	0.0007241	0.01875	0.286
1904247_Proteos_005.RAW	AF-M	Artificial Fingerprint	High	Sequest HT	Sequest HT (A2)	A	2	Unambiguous	VQALEEANNDLENK	VQALEEAnNDLENK	N8(Deamidated)	1	1	P35527	P35527	Keratin, type I cytoskeletal 9 OS=Homo sapiens OX=9606 GN=KRT9 PE=1 SV=3	0	2	2	0.0235	0	1	1	1	794.378	1587.75	1587.75	0.01	1e-05	0	0	1.28449e+06	HCD	MS2	1.32312	50	69.6348	21792	21792	21791	0/0		3.41	2973	0	0.0008992	0.743
1904247_Proteos_005.RAW	AF-M	Artificial Fingerprint	High	Sequest HT	Sequest HT (A2)	A	2	Unambiguous	VQALEEANNDLENK	VQALEEANnDLENK	N9(Deamidated)	1	1	P35527	P35527	Keratin, type I cytoskeletal 9 OS=Homo sapiens OX=9606 GN=KRT9 PE=1 SV=3	0	2	2		0.0235	2	2	2	794.378	1587.75	1587.75	0.01	1e-05	0	0	1.28449e+06	HCD	MS2	1.32312	50	69.6348	21792	21792	21791	0/0		3.33	2973	0	0.001016	0.724
1904247_Proteos_005.RAW	AF-M	Artificial Fingerprint	High	Sequest HT	Sequest HT (A2)	A	2	Unambiguous	QGVDADINGLR	QGVDADInGLR	N8(Deamidated)	1	1	P35527	P35527	Keratin, type I cytoskeletal 9 OS=Homo sapiens OX=9606 GN=KRT9 PE=1 SV=3	0	2	2	0.4517	0	1	1	1	579.791	1158.58	1158.57	0.15	9e-05	0	0	672162	HCD	MS2	24.2065	50	69.6492	21796	21796	21795	0/0		2.9	1265	0	0.001618	0.655
1904247_Proteos_005.RAW	AF-M	Artificial Fingerprint	High	Sequest HT	Sequest HT (A2)	A	2	Unambiguous	QGVDADINGLR	QGVDADInGLR	N8(Deamidated)	1	1	P35527	P35527	Keratin, type I cytoskeletal 9 OS=Homo sapiens OX=9606 GN=KRT9 PE=1 SV=3	0	2	2	0.4532	0	1	1	1	579.791	1158.58	1158.57	0.26	0.00015	0	0	642889	HCD	MS2	18.2216	50	69.6597	21801	21801	21800	0/0		2.78	1265	0	0.001086	0.715
1904247_Proteos_005.RAW	AF-M	Artificial Fingerprint	High	Sequest HT	Sequest HT (A2)	A	2	Unambiguous	TNAENEFVTIK	TNAENEFVTIK		1	1	P04264	P04264	Keratin, type II cytoskeletal 1 OS=Homo sapiens OX=9606 GN=KRT1 PE=1 SV=6	0	2	2	0.4257	0	1	1	1	633.322	1265.64	1265.64	0.04	2e-05	0	0	722638	HCD	MS2	2.87836	50	69.6725	21804	21804	21803	0/0		2.49	1451	0.0007241	0.007711	0.42
1904247_Proteos_005.RAW	AF-M	Artificial Fingerprint	High	Sequest HT	Sequest HT (A2)	A	2	Unambiguous	LGIYEAMK	LGIYEAMK		1	1	P15924	P15924	Desmoplakin OS=Homo sapiens OX=9606 GN=DSP PE=1 SV=3	0	2	2	0.4065	0	1	1	1	462.747	924.486	924.486	0.17	8e-05	0	0	647731	HCD	MS2	31.3969	50	69.7071	21813	21813	21812	0/0		1.55	703	0.001797	0.04716	0.146
1904247_Proteos_005.RAW	AF-M	Artificial Fingerprint	High	Sequest HT	Sequest HT (A2)	A	2	Unambiguous	IKFEMEQNLR	IKFEMEQNLR		1	1	P35527	P35527	Keratin, type I cytoskeletal 9 OS=Homo sapiens OX=9606 GN=KRT9 PE=1 SV=3	1	2	2	0.2113	0	1	1	1	654.343	1307.68	1307.68	0.3	0.0002	0	0	218906	HCD	MS2	8.90175	50	69.754	21824	21824	21823	0/0		1.42	1174	0.001797	0.04238	0.163
1904247_Proteos_005.RAW	AF-M	Artificial Fingerprint	High	Sequest HT	Sequest HT (A2)	A	2	Unambiguous	IKFEMEQNLR	IKFEMEQNLR		1	1	P35527	P35527	Keratin, type I cytoskeletal 9 OS=Homo sapiens OX=9606 GN=KRT9 PE=1 SV=3	1	3	3	0.2101	0	1	1	1	436.564	1307.68	1307.68	0.34	0.00015	0	0	1.49112e+06	HCD	MS2	0.783001	50	69.7847	21834	21834	21833	0/0		2.57	1174	0.0007241	0.01564	0.313
1904247_Proteos_005.RAW	AF-M	Artificial Fingerprint	High	Sequest HT	Sequest HT (A2)	A	2	Unambiguous	ALEEANADLEVK	ALEEAnADLEVK	N6(Deamidated)	2	4	P02533; P08779	P02533; P19012; P13646; P08779	Keratin, type I cytoskeletal 14 OS=Homo sapiens OX=9606 GN=KRT14 PE=1 SV=4; Keratin, type I cytoskeletal 15 OS=Homo sapiens OX=9606 GN=KRT15 PE=1 SV=3; Keratin, type I cytoskeletal 13 OS=Homo sapiens OX=9606 GN=KRT13 PE=1 SV=4; Keratin, type I cytoskeletal 16 OS=Homo sapiens OX=9606 GN=KRT16 PE=1 SV=4	0	2	2	0.4408	0	1	1	1	651.825	1302.64	1302.64	0.02	1e-05	0	0	224259	HCD	MS2	8.52134	50	69.7926	21837	21837	21836	0/0		2.11	1600	0.0007241	0.005539	0.47
1904247_Proteos_005.RAW	AF-M	Artificial Fingerprint	High	Sequest HT	Sequest HT (A2)	A	2	Unambiguous	GGSGGSHGGGSGFGGESGGSYGGGEEASGSGGGYGGGSGK	GGSGGSHGGGSGFGGESGGSYGGGEEASGSGGGYGGGSGK		1	1	P35527	P35527	Keratin, type I cytoskeletal 9 OS=Homo sapiens OX=9606 GN=KRT9 PE=1 SV=3	0	3	3	0.6096	0	1	1	1	1075.1	3223.28	3223.28	0.04	5e-05	0	0	163066	HCD	MS2	0	50	69.8889	21863	21863	21862	0/0		3.74	3886	0	0.002732	0.576
1904247_Proteos_005.RAW	AF-M	Artificial Fingerprint	High	Sequest HT	Sequest HT (A2)	A	2	Unambiguous	MSGECAPNVSVSVSTSHTTISGGGSR	mSGEcAPNVSVSVSTSHTTISGGGSR	M1(Oxidation); C5(Carbamidomethyl)	1	1	P04264	P04264	Keratin, type II cytoskeletal 1 OS=Homo sapiens OX=9606 GN=KRT1 PE=1 SV=6	0	3	3	0.487	0	1	1	1	861.059	2581.16	2581.16	-0.11	-0.0001	0	0	1.10562e+06	HCD	MS2	0	50	69.8955	21865	21865	21864	0/0		5.77	8835	0	0.0001989	0.97
1904247_Proteos_005.RAW	AF-M	Artificial Fingerprint	High	Sequest HT	Sequest HT (A2)	A	2	Unambiguous	FLEQQNQVLQTK	FLEQQNQVLQTK		2	3	P35908; P04264	Q7Z794; P35908; P04264	Keratin, type II cytoskeletal 1b OS=Homo sapiens OX=9606 GN=KRT77 PE=2 SV=3; Keratin, type II cytoskeletal 2 epidermal OS=Homo sapiens OX=9606 GN=KRT2 PE=1 SV=2; Keratin, type II cytoskeletal 1 OS=Homo sapiens OX=9606 GN=KRT1 PE=1 SV=6	0	2	2	0.4731	0	1	1	1	738.396	1475.79	1475.79	0.04	3e-05	0	0	379368	HCD	MS2	5.22664	50	69.991	21889	21889	21888	0/0		2.6	1296	0.0007241	0.005375	0.474
1904247_Proteos_005.RAW	AF-M	Artificial Fingerprint	High	Sequest HT	Sequest HT (A2)	A	2	Unambiguous	IRLENEIQTYR	IRLEnEIQTYR	N5(Deamidated)	1	1	P13645	P13645	Keratin, type I cytoskeletal 10 OS=Homo sapiens OX=9606 GN=KRT10 PE=1 SV=6	1	3	3	0.2422	0	1	1	1	479.256	1435.75	1435.75	0.17	8e-05	0	0	377828	HCD	MS2	34.3749	50	70.0634	21910	21910	21909	0/0		2.56	1322	0.002625	0.06079	0.108
1904247_Proteos_005.RAW	AF-M	Artificial Fingerprint	High	Sequest HT	Sequest HT (A2)	A	2	Unambiguous	MTLDDFR	mTLDDFR	M1(Oxidation)	1	1	P35527	P35527	Keratin, type I cytoskeletal 9 OS=Homo sapiens OX=9606 GN=KRT9 PE=1 SV=3	0	2	2	0.5052	0	1	1	1	457.208	913.408	913.408	0.04	2e-05	0	0	544858	HCD	MS2	0	50	70.0712	21913	21913	21912	0/0		1.92	892	0.0007241	0.01506	0.319
1904247_Proteos_005.RAW	AF-M	Artificial Fingerprint	High	Sequest HT	Sequest HT (A2)	A	2	Unambiguous	QVLDNLTMEK	QVLDNLTmEK	M8(Oxidation)	1	1	P35527	P35527	Keratin, type I cytoskeletal 9 OS=Homo sapiens OX=9606 GN=KRT9 PE=1 SV=3	0	2	2	0.4053	0	1	1	1	603.805	1206.6	1206.6	0.08	5e-05	0	0	743561	HCD	MS2	1.60092	50	70.0935	21924	21924	21923	0/0		2.27	1348	0.0007241	0.02505	0.242
1904247_Proteos_005.RAW	AF-M	Artificial Fingerprint	High	Sequest HT	Sequest HT (A2)	A	2	Unambiguous	NMQDMVEDYR	NmQDMVEDYR	M2(Oxidation)	1	1	P04264	P04264	Keratin, type II cytoskeletal 1 OS=Homo sapiens OX=9606 GN=KRT1 PE=1 SV=6	0	2	2	0.2042	0	1	1	1	658.766	1316.52	1316.52	0.02	1e-05	0	0	832464	HCD	MS2	0.807651	50	70.1327	21938	21938	21937	0/0		2.4	1143	0.0007241	0.01224	0.35
1904247_Proteos_005.RAW	AF-M	Artificial Fingerprint	High	Sequest HT	Sequest HT (A2)	A	2	Rejected	YQELQITAGR	YqELQITAGR	Q2(Deamidated)	0	1		Q7Z794	Keratin, type II cytoskeletal 1b OS=Homo sapiens OX=9606 GN=KRT77 PE=2 SV=3	0	2	2	0	0	1	1	1	590.304	1179.6	1179.6	0.28	0.00016	0	0	1.45216e+06	HCD	MS2	0	50	70.2485	21994	21994	21993	0/0		2.55	1165	0.0007241	0.003812	0.526
1904247_Proteos_005.RAW	AF-M	Artificial Fingerprint	High	Sequest HT	Sequest HT (A2)	A	2	Selected	YEELQITAGR	YEELQITAGR		2	2	P04264; P04259	P04264; P04259	Keratin, type II cytoskeletal 1 OS=Homo sapiens OX=9606 GN=KRT1 PE=1 SV=6; Keratin, type II cytoskeletal 6B OS=Homo sapiens OX=9606 GN=KRT6B PE=1 SV=5	0	2	2		0	2	2	2	590.304	1179.6	1179.6	0.28	0.00016	0	0	1.45216e+06	HCD	MS2	0	50	70.2485	21994	21994	21993	0/0		2.55	1165	0.0007241	0.003812	0.526
1904247_Proteos_005.RAW	AF-M	Artificial Fingerprint	High	Sequest HT	Sequest HT (A2)	A	2	Unambiguous	GGSGGSYGGGSGSGGGSGGGYGGGSGGGHSGGSGGGHSGGSGGNYGGGSGSGGGSGGGYGGGSGSR	GGSGGSYGGGSGSGGGSGGGYGGGSGGGHSGGSGGGHSGGSGGNYGGGSGSGGGSGGGYGGGSGSR		1	1	P35527	P35527	Keratin, type I cytoskeletal 9 OS=Homo sapiens OX=9606 GN=KRT9 PE=1 SV=3	0	4	4	0.3047	0	1	1	1	1243.99	4972.93	4972.94	-0.92	-0.00115	0	0	79322.2	HCD	MS2	0	50	70.4152	22056	22056	22055	0/0		2.33	1666	0	0.002897	0.567
1904247_Proteos_005.RAW	AF-M	Artificial Fingerprint	High	Sequest HT	Sequest HT (A2)	A	2	Unambiguous	QSVEADINGLR	QSVEADInGLR	N8(Deamidated)	1	3	P13645	Q2M2I5; P13645; P13646	Keratin, type I cytoskeletal 24 OS=Homo sapiens OX=9606 GN=KRT24 PE=1 SV=1; Keratin, type I cytoskeletal 10 OS=Homo sapiens OX=9606 GN=KRT10 PE=1 SV=6; Keratin, type I cytoskeletal 13 OS=Homo sapiens OX=9606 GN=KRT13 PE=1 SV=4	0	2	2	0.4444	0	1	1	1	601.804	1202.6	1202.6	0.28	0.00017	0	0	835685	HCD	MS2	1.58014	50	70.5447	22092	22092	22091	0/0		2.79	1307	0.0007241	0.007876	0.417
1904247_Proteos_005.RAW	AF-M	Artificial Fingerprint	High	Sequest HT	Sequest HT (A2)	A	2	Unambiguous	VQALEEANNDLENK	VQALEEANnDLENK	N9(Deamidated)	1	1	P35527	P35527	Keratin, type I cytoskeletal 9 OS=Homo sapiens OX=9606 GN=KRT9 PE=1 SV=3	0	2	2	0.0033	0	1	1	1	794.379	1587.75	1587.75	0.39	0.00031	0	0	439698	HCD	MS2	8.8318	50	70.6417	22125	22125	22124	0/0		3.06	2939	0	0.001272	0.691
1904247_Proteos_005.RAW	AF-M	Artificial Fingerprint	High	Sequest HT	Sequest HT (A2)	A	2	Unambiguous	VQALEEANNDLENK	VQALEEAnNDLENK	N8(Deamidated)	1	1	P35527	P35527	Keratin, type I cytoskeletal 9 OS=Homo sapiens OX=9606 GN=KRT9 PE=1 SV=3	0	2	2		0.0033	2	2	2	794.379	1587.75	1587.75	0.39	0.00031	0	0	439698	HCD	MS2	8.8318	50	70.6417	22125	22125	22124	0/0		3.05	2939	0	0.001277	0.69
1904247_Proteos_005.RAW	AF-M	Artificial Fingerprint	High	Sequest HT	Sequest HT (A2)	A	2	Unambiguous	QGVDADINGLR	QGVDADInGLR	N8(Deamidated)	1	1	P35527	P35527	Keratin, type I cytoskeletal 9 OS=Homo sapiens OX=9606 GN=KRT9 PE=1 SV=3	0	2	2	0.4474	0	1	1	1	579.791	1158.58	1158.57	0.26	0.00015	0	0	4029165	HCD	MS2	0.760941	21.198	70.6672	22134	22134	22133	0/0		3.04	1265	0	0.001488	0.667
1904247_Proteos_005.RAW	AF-M	Artificial Fingerprint	High	Sequest HT	Sequest HT (A2)	A	2	Unambiguous	TNAENEFVTIK	TNAENEFVTIK		1	1	P04264	P04264	Keratin, type II cytoskeletal 1 OS=Homo sapiens OX=9606 GN=KRT1 PE=1 SV=6	0	2	2	0.4216	0	1	1	1	633.323	1265.64	1265.64	1.1	0.0007	0	0	394320	HCD	MS2	17.1489	50	70.6766	22138	22138	22137	0/0		2.04	1479	0.0007241	0.02393	0.249
1904247_Proteos_005.RAW	AF-M	Artificial Fingerprint	High	Sequest HT	Sequest HT (A2)	A	2	Unambiguous	AHLERQRYLELR	AHLERQRyLELR	Y8(Phospho)	1	1	B2RTY4	B2RTY4	Unconventional myosin-IXa OS=Homo sapiens OX=9606 GN=MYO9A PE=1 SV=2	2	3	3	0.0533	0	1	1	1	555.286	1663.84	1663.84	0.4	0.00022	0	0	146461	HCD	MS2	67.6569	50	70.7507	22165	22165	22164	0/0		1.5	2294	0.004031	0.07114	0.083
1904247_Proteos_005.RAW	AF-M	Artificial Fingerprint	High	Sequest HT	Sequest HT (A2)	A	2	Unambiguous	IKFEMEQNLR	IKFEMEQNLR		1	1	P35527	P35527	Keratin, type I cytoskeletal 9 OS=Homo sapiens OX=9606 GN=KRT9 PE=1 SV=3	1	3	3	0.2449	0	1	1	1	436.564	1307.68	1307.68	0.2	9e-05	0	0	594105	HCD	MS2	0	50	70.7882	22176	22176	22175	0/0		1.96	1173	0.0007241	0.02355	0.252
1904247_Proteos_005.RAW	AF-M	Artificial Fingerprint	High	Sequest HT	Sequest HT (A2)	A	2	Unambiguous	GGSGGSHGGGSGFGGESGGSYGGGEEASGSGGGYGGGSGK	GGSGGSHGGGSGFGGESGGSYGGGEEASGSGGGYGGGSGK		1	1	P35527	P35527	Keratin, type I cytoskeletal 9 OS=Homo sapiens OX=9606 GN=KRT9 PE=1 SV=3	0	3	3	0.5435	0	1	1	1	1075.1	3223.28	3223.28	0.38	0.00041	0	0	203560	HCD	MS2	0	50	70.8956	22211	22211	22210	0/0		3.33	4047	0	9.898e-05	1.074
1904247_Proteos_005.RAW	AF-M	Artificial Fingerprint	High	Sequest HT	Sequest HT (A2)	A	2	Unambiguous	MSGECAPNVSVSVSTSHTTISGGGSR	mSGEcAPNVSVSVSTSHTTISGGGSR	M1(Oxidation); C5(Carbamidomethyl)	1	1	P04264	P04264	Keratin, type II cytoskeletal 1 OS=Homo sapiens OX=9606 GN=KRT1 PE=1 SV=6	0	3	3	0.5092	0	1	1	1	861.058	2581.16	2581.16	-0.96	-0.00083	0	0	315694	HCD	MS2	8.24392	50	70.902	22213	22213	22212	0/0		4.87	8874	0	4.158e-05	1.205
1904247_Proteos_005.RAW	AF-M	Artificial Fingerprint	High	Sequest HT	Sequest HT (A2)	A	2	Unambiguous	FLEQQNQVLQTK	FLEQQNQVLQTK		2	3	P35908; P04264	Q7Z794; P35908; P04264	Keratin, type II cytoskeletal 1b OS=Homo sapiens OX=9606 GN=KRT77 PE=2 SV=3; Keratin, type II cytoskeletal 2 epidermal OS=Homo sapiens OX=9606 GN=KRT2 PE=1 SV=2; Keratin, type II cytoskeletal 1 OS=Homo sapiens OX=9606 GN=KRT1 PE=1 SV=6	0	2	2	0.4074	0	1	1	1	738.397	1475.79	1475.79	1.11	0.00082	0	0	34784816	HCD	MS2	0.0765212	3.197	70.9929	22238	22238	22237	0/0		2.97	1282	0	0.002846	0.57
1904247_Proteos_005.RAW	AF-M	Artificial Fingerprint	High	Sequest HT	Sequest HT (A2)	A	2	Unambiguous	MTLDDFR	mTLDDFR	M1(Oxidation)	1	1	P35527	P35527	Keratin, type I cytoskeletal 9 OS=Homo sapiens OX=9606 GN=KRT9 PE=1 SV=3	0	2	2	0.5309	0	1	1	1	457.208	913.408	913.408	-0.02	-1e-05	0	0	344136	HCD	MS2	3.7489	50	71.0762	22266	22266	22265	0/0		1.94	892	0.0007241	0.0108	0.369
1904247_Proteos_005.RAW	AF-M	Artificial Fingerprint	High	Sequest HT	Sequest HT (A2)	A	2	Unambiguous	QVLDNLTMEK	QVLDNLTmEK	M8(Oxidation)	1	1	P35527	P35527	Keratin, type I cytoskeletal 9 OS=Homo sapiens OX=9606 GN=KRT9 PE=1 SV=3	0	2	2	0.4115	0	1	1	1	603.805	1206.6	1206.6	0.08	5e-05	0	0	401358	HCD	MS2	46.2162	50	71.098	22273	22273	22271	0/0		2.09	1348	0.0007241	0.009139	0.394
1904247_Proteos_005.RAW	AF-M	Artificial Fingerprint	High	Sequest HT	Sequest HT (A2)	A	2	Unambiguous	NMQDMVEDYR	NmQDMVEDYR	M2(Oxidation)	1	1	P04264	P04264	Keratin, type II cytoskeletal 1 OS=Homo sapiens OX=9606 GN=KRT1 PE=1 SV=6	0	2	2	0.239	0	1	1	1	658.766	1316.52	1316.52	-0.17	-0.00011	0	0	973766	HCD	MS2	4.1326	50	71.1372	22283	22283	22282	0/0		2.51	1131	0.0007241	0.0124	0.348
1904247_Proteos_005.RAW	AF-M	Artificial Fingerprint	High	Sequest HT	Sequest HT (A2)	A	2	Rejected	YQELQITAGR	YqELQITAGR	Q2(Deamidated)	0	1		Q7Z794	Keratin, type II cytoskeletal 1b OS=Homo sapiens OX=9606 GN=KRT77 PE=2 SV=3	0	2	2	0	0	1	1	1	590.304	1179.6	1179.6	0.17	0.0001	0	0	899586	HCD	MS2	3.90138	50	71.2525	22316	22316	22315	0/0		2.49	1165	0.0007241	0.00687	0.437
1904247_Proteos_005.RAW	AF-M	Artificial Fingerprint	High	Sequest HT	Sequest HT (A2)	A	2	Selected	YEELQITAGR	YEELQITAGR		2	2	P04264; P04259	P04264; P04259	Keratin, type II cytoskeletal 1 OS=Homo sapiens OX=9606 GN=KRT1 PE=1 SV=6; Keratin, type II cytoskeletal 6B OS=Homo sapiens OX=9606 GN=KRT6B PE=1 SV=5	0	2	2		0	2	2	2	590.304	1179.6	1179.6	0.17	0.0001	0	0	899586	HCD	MS2	3.90138	50	71.2525	22316	22316	22315	0/0		2.49	1165	0.0007241	0.00687	0.437
1904247_Proteos_005.RAW	AF-M	Artificial Fingerprint	High	Sequest HT	Sequest HT (A2)	A	2	Unambiguous	QSLEASLAETEGR	QSLEASLAETEGR		1	1	P13645	P13645	Keratin, type I cytoskeletal 10 OS=Homo sapiens OX=9606 GN=KRT10 PE=1 SV=6	0	3	3	0.145	0	1	1	1	464.232	1390.68	1390.68	1.33	0.00062	0	0	31733.3	HCD	MS2	65.8891	50	71.3589	22345	22345	22343	0/0		1.31	1764	0.004031	0.07577	0.074
1904247_Proteos_005.RAW	AF-M	Artificial Fingerprint	High	Sequest HT	Sequest HT (A2)	A	2	Unambiguous	VQALEEANNDLENK	VQALEEANnDLENK	N9(Deamidated)	1	1	P35527	P35527	Keratin, type I cytoskeletal 9 OS=Homo sapiens OX=9606 GN=KRT9 PE=1 SV=3	0	2	2	0.071	0	1	1	1	794.378	1587.75	1587.75	0.01	1e-05	0	0	151984	HCD	MS2	7.54327	50	71.6523	22431	22431	22430	0/0		1.55	2973	0.00793	0.09661	0.036
1904247_Proteos_005.RAW	AF-M	Artificial Fingerprint	High	Sequest HT	Sequest HT (A2)	A	2	Selected	LWDLEK	LWDLEK		1	1	P15924	P15924	Desmoplakin OS=Homo sapiens OX=9606 GN=DSP PE=1 SV=3	0	2	2	0	0	1	1	2	402.219	803.43	803.43	0.47	0.00019	0	0	154145	HCD	MS2	0	50	71.6627	22436	22436	22435	0/0		1.21	1022	0.001797	0.02914	0.22
1904247_Proteos_005.RAW	AF-M	Artificial Fingerprint	High	Sequest HT	Sequest HT (A2)	A	2	Rejected	IWNLEK	IWnLEK	N3(Deamidated)	0	2		Q9H270; A0A087WXL6	Vacuolar protein sorting-associated protein 11 homolog OS=Homo sapiens OX=9606 GN=VPS11 PE=1 SV=1; Vacuolar protein sorting-associated protein 11 homolog OS=Homo sapiens (Human) OX=9606 GN=VPS11 hCG_39399	0	2	2		0	2	2	3	402.219	803.43	803.43	0.47	0.00019	0	0	154145	HCD	MS2	0	50	71.6627	22436	22436	22435	0/0		1.21	1022	0.001406	0.02914	0.22
1904247_Proteos_005.RAW	AF-M	Artificial Fingerprint	High	Sequest HT	Sequest HT (A2)	A	2	Rejected	LWNLQK	LWnLqK	N3(Deamidated); Q5(Deamidated)	0	2		Q9NRL3; Q13033	Striatin-4 OS=Homo sapiens OX=9606 GN=STRN4 PE=1 SV=2; Striatin-3 OS=Homo sapiens OX=9606 GN=STRN3 PE=1 SV=3	0	2	2		0	3	3	4	402.219	803.43	803.43	0.47	0.00019	0	0	154145	HCD	MS2	0	50	71.6627	22436	22436	22435	0/0		1.21	1022	0.001406	0.02913	0.22
1904247_Proteos_005.RAW	AF-M	Artificial Fingerprint	High	Sequest HT	Sequest HT (A2)	A	2	Unambiguous	QGVDADINGLR	QGVDADInGLR	N8(Deamidated)	1	1	P35527	P35527	Keratin, type I cytoskeletal 9 OS=Homo sapiens OX=9606 GN=KRT9 PE=1 SV=3	0	2	2	0.4343	0	1	1	1	579.791	1158.58	1158.57	0.15	9e-05	0	0	1465399	HCD	MS2	0.57905	50	71.6708	22439	22439	22438	0/0		2.97	1265	0	0.00281	0.572
1904247_Proteos_005.RAW	AF-M	Artificial Fingerprint	High	Sequest HT	Sequest HT (A2)	A	2	Unambiguous	TNAENEFVTIK	TNAENEFVTIK		1	1	P04264	P04264	Keratin, type II cytoskeletal 1 OS=Homo sapiens OX=9606 GN=KRT1 PE=1 SV=6	0	2	2	0.4378	0	1	1	1	633.323	1265.64	1265.64	0.52	0.00033	0	0	205934	HCD	MS2	4.82222	50	71.6789	22442	22442	22441	0/0		2.17	1461	0	0.002373	0.597
1904247_Proteos_005.RAW	AF-M	Artificial Fingerprint	High	Sequest HT	Sequest HT (A2)	A	2	Selected	IKFEMEQNLR	IKFEMEQNLR		1	1	P35527	P35527	Keratin, type I cytoskeletal 9 OS=Homo sapiens OX=9606 GN=KRT9 PE=1 SV=3	1	3	3	0.0161	0	1	1	2	436.564	1307.68	1307.68	-0.08	-4e-05	0	0	425593	HCD	MS2	4.08221	50	71.7935	22484	22484	22483	0/0		1.24	1177	0.001797	0.04486	0.154
1904247_Proteos_005.RAW	AF-M	Artificial Fingerprint	High	Sequest HT	Sequest HT (A2)	A	2	Unambiguous	FSSCGGGGGSFGAGGGFGSR	FSScGGGGGSFGAGGGFGSR	C4(Carbamidomethyl)	1	1	P04264	P04264	Keratin, type II cytoskeletal 1 OS=Homo sapiens OX=9606 GN=KRT1 PE=1 SV=6	0	2	2	0.5652	0	1	1	1	883.37	1765.73	1765.73	-0.71	-0.00063	0	0	201600	HCD	MS2	18.7633	50	71.806	22487	22487	22486	0/0		2.99	3064	0	0.0009214	0.739
1904247_Proteos_005.RAW	AF-M	Artificial Fingerprint	High	Sequest HT	Sequest HT (A2)	A	2	Unambiguous	YEELQVTVGR	YEELQVTVGR		1	1	P35908	P35908	Keratin, type II cytoskeletal 2 epidermal OS=Homo sapiens OX=9606 GN=KRT2 PE=1 SV=2	0	2	2	0.4571	0	1	1	1	597.312	1193.62	1193.62	0.05	3e-05	0	0	94335.4	HCD	MS2	13.6201	50	71.8348	22498	22498	22497	0/0		1.75	1060	0.001406	0.02765	0.227
1904247_Proteos_005.RAW	AF-M	Artificial Fingerprint	High	Sequest HT	Sequest HT (A2)	A	2	Unambiguous	TLLDIDNTR	TLLDIDNTR		1	1	P35527	P35527	Keratin, type I cytoskeletal 9 OS=Homo sapiens OX=9606 GN=KRT9 PE=1 SV=3	0	2	2	0.4277	0	1	1	1	530.785	1060.56	1060.56	0.08	4e-05	0	0	44570.3	HCD	MS2	44.5689	50	71.858	22505	22505	22504	0/0		1.73	1189	0.001797	0.03802	0.179
1904247_Proteos_005.RAW	AF-M	Artificial Fingerprint	High	Sequest HT	Sequest HT (A2)	A	2	Unambiguous	GGSGGSHGGGSGFGGESGGSYGGGEEASGSGGGYGGGSGK	GGSGGSHGGGSGFGGESGGSYGGGEEASGSGGGYGGGSGK		1	1	P35527	P35527	Keratin, type I cytoskeletal 9 OS=Homo sapiens OX=9606 GN=KRT9 PE=1 SV=3	0	3	3	0.5091	0	1	1	1	1075.1	3223.28	3223.28	-0.07	-8e-05	0	0	203585	HCD	MS2	0	50	71.9016	22518	22518	22517	0/0		3.3	3902	0	0.002086	0.616
1904247_Proteos_005.RAW	AF-M	Artificial Fingerprint	High	Sequest HT	Sequest HT (A2)	A	2	Unambiguous	MSGECAPNVSVSVSTSHTTISGGGSR	mSGEcAPNVSVSVSTSHTTISGGGSR	M1(Oxidation); C5(Carbamidomethyl)	1	1	P04264	P04264	Keratin, type II cytoskeletal 1 OS=Homo sapiens OX=9606 GN=KRT1 PE=1 SV=6	0	3	3	0.4598	0	1	1	1	861.059	2581.16	2581.16	-0.04	-4e-05	0	0	605323	HCD	MS2	0	50	71.9096	22521	22521	22520	0/0		5.35	8861	0	0.0001724	0.991
1904247_Proteos_005.RAW	AF-M	Artificial Fingerprint	High	Sequest HT	Sequest HT (A2)	A	2	Unambiguous	FLEQQNQVLQTK	FLEQQNQVLQTK		2	3	P35908; P04264	Q7Z794; P35908; P04264	Keratin, type II cytoskeletal 1b OS=Homo sapiens OX=9606 GN=KRT77 PE=2 SV=3; Keratin, type II cytoskeletal 2 epidermal OS=Homo sapiens OX=9606 GN=KRT2 PE=1 SV=2; Keratin, type II cytoskeletal 1 OS=Homo sapiens OX=9606 GN=KRT1 PE=1 SV=6	0	2	2	0.4887	0	1	1	1	738.396	1475.78	1475.79	-0.29	-0.00022	0	0	2.06183e+06	HCD	MS2	0.846612	50	71.9988	22549	22549	22548	0/0		3.09	1296	0	0.002364	0.598
1904247_Proteos_005.RAW	AF-M	Artificial Fingerprint	High	Sequest HT	Sequest HT (A2)	A	2	Unambiguous	MTLDDFR	mTLDDFR	M1(Oxidation)	1	1	P35527	P35527	Keratin, type I cytoskeletal 9 OS=Homo sapiens OX=9606 GN=KRT9 PE=1 SV=3	0	2	2	0.4757	0	1	1	1	457.208	913.408	913.408	-0.16	-7e-05	0	0	282957	HCD	MS2	15.7085	50	72.0794	22574	22574	22573	0/0		1.85	893	0.0007241	0.01676	0.303
1904247_Proteos_005.RAW	AF-M	Artificial Fingerprint	High	Sequest HT	Sequest HT (A2)	A	2	Unambiguous	TAAENDFVTLK	TAAENDFVTLK		1	1	P35908	P35908	Keratin, type II cytoskeletal 2 epidermal OS=Homo sapiens OX=9606 GN=KRT2 PE=1 SV=2	0	2	2	0.4096	0	1	1	1	604.812	1208.62	1208.62	0.12	7e-05	0	0	1.89058e+06	HCD	MS2	9.47228	34.299	72.1071	22582	22582	22581	0/0		2.71	1242	0.0007241	0.005508	0.47
1904247_Proteos_005.RAW	AF-M	Artificial Fingerprint	High	Sequest HT	Sequest HT (A2)	A	2	Unambiguous	NMQDMVEDYR	NmQDMVEDYR	M2(Oxidation)	1	1	P04264	P04264	Keratin, type II cytoskeletal 1 OS=Homo sapiens OX=9606 GN=KRT1 PE=1 SV=6	0	2	2	0.133	0	1	1	1	658.766	1316.52	1316.52	-0.08	-5e-05	0	0	927869	HCD	MS2	1.83811	50	72.1411	22591	22591	22590	0/0		2.18	1143	0.0007241	0.01952	0.28
1904247_Proteos_005.RAW	AF-M	Artificial Fingerprint	High	Sequest HT	Sequest HT (A2)	A	2	Unambiguous	QSLEASLAETEGR	QSLEASLAETEGR		1	1	P13645	P13645	Keratin, type I cytoskeletal 10 OS=Homo sapiens OX=9606 GN=KRT10 PE=1 SV=6	0	2	2	0.5197	0	1	1	1	695.844	1390.68	1390.68	0.07	5e-05	0	0	8.27106e+06	HCD	MS2	0.561948	13.667	72.2018	22608	22608	22607	0/0		3.81	1824	0	0.0003838	0.871
1904247_Proteos_005.RAW	AF-M	Artificial Fingerprint	High	Sequest HT	Sequest HT (A2)	A	2	Unambiguous	FSSCGGGGGSFGAGGGFGSR	FSScGGGGGSFGAGGGFGSR	C4(Carbamidomethyl)	1	1	P04264	P04264	Keratin, type II cytoskeletal 1 OS=Homo sapiens OX=9606 GN=KRT1 PE=1 SV=6	0	3	3	0.4315	0	1	1	1	589.25	1765.74	1765.73	0.52	0.00031	0	0	604039	HCD	MS2	0	50	72.3607	22649	22649	22646	0/0		2.48	3257	0.0007241	0.004285	0.508
1904247_Proteos_005.RAW	AF-M	Artificial Fingerprint	High	Sequest HT	Sequest HT (A2)	A	2	Rejected	YQELQITAGR	YqELQITAGR	Q2(Deamidated)	0	1		Q7Z794	Keratin, type II cytoskeletal 1b OS=Homo sapiens OX=9606 GN=KRT77 PE=2 SV=3	0	2	2	0	0	1	1	1	590.304	1179.6	1179.6	0.59	0.00035	0	0	508740	HCD	MS2	34.0571	50	72.571	22719	22719	22718	0/0		2.43	1165	0.0007241	0.00872	0.401
1904247_Proteos_005.RAW	AF-M	Artificial Fingerprint	High	Sequest HT	Sequest HT (A2)	A	2	Selected	YEELQITAGR	YEELQITAGR		2	2	P04264; P04259	P04264; P04259	Keratin, type II cytoskeletal 1 OS=Homo sapiens OX=9606 GN=KRT1 PE=1 SV=6; Keratin, type II cytoskeletal 6B OS=Homo sapiens OX=9606 GN=KRT6B PE=1 SV=5	0	2	2		0	2	2	2	590.304	1179.6	1179.6	0.59	0.00035	0	0	508740	HCD	MS2	34.0571	50	72.571	22719	22719	22718	0/0		2.43	1165	0.0007241	0.00872	0.401
1904247_Proteos_005.RAW	AF-M	Artificial Fingerprint	High	Sequest HT	Sequest HT (A2)	A	2	Unambiguous	QGVDADINGLR	QGVDADInGLR	N8(Deamidated)	1	1	P35527	P35527	Keratin, type I cytoskeletal 9 OS=Homo sapiens OX=9606 GN=KRT9 PE=1 SV=3	0	2	2	0.408	0	1	1	1	579.791	1158.58	1158.57	0.58	0.00033	0	0	14911842	HCD	MS2	0.172715	5.708	72.6808	22755	22755	22754	0/0		2.99	1268	0	0.00214	0.613
1904247_Proteos_005.RAW	AF-M	Artificial Fingerprint	High	Sequest HT	Sequest HT (A2)	A	2	Unambiguous	QVLDNLTMEK	QVLDNLTmEK	M8(Oxidation)	1	1	P35527	P35527	Keratin, type I cytoskeletal 9 OS=Homo sapiens OX=9606 GN=KRT9 PE=1 SV=3	0	2	2	0.2622	0	1	1	1	603.805	1206.6	1206.6	-0.22	-0.00013	0	0	280079	HCD	MS2	17.0433	50	72.7297	22772	22772	22770	0/0		1.64	1349	0.0007241	0.0101	0.379
1904247_Proteos_005.RAW	AF-M	Artificial Fingerprint	High	Sequest HT	Sequest HT (A2)	A	2	Unambiguous	FSSCGGGGGSFGAGGGFGSR	FSScGGGGGSFGAGGGFGSR	C4(Carbamidomethyl)	1	1	P04264	P04264	Keratin, type II cytoskeletal 1 OS=Homo sapiens OX=9606 GN=KRT1 PE=1 SV=6	0	2	2	0.5329	0	1	1	1	883.371	1765.73	1765.73	-0.16	-0.00014	0	0	5799717	HCD	MS2	0	17.287	72.8127	22798	22798	22797	0/0		4.41	3171	0	8.978e-05	1.089
1904247_Proteos_005.RAW	AF-M	Artificial Fingerprint	High	Sequest HT	Sequest HT (A2)	A	2	Unambiguous	YEELQVTVGR	YEELQVTVGR		1	1	P35908	P35908	Keratin, type II cytoskeletal 2 epidermal OS=Homo sapiens OX=9606 GN=KRT2 PE=1 SV=2	0	2	2	0.4784	0	1	1	1	597.312	1193.62	1193.62	-0.05	-3e-05	0	0	8916936	HCD	MS2	2.23759	9.384	72.8369	22807	22807	22806	0/0		2.55	1060	0.0007241	0.007517	0.424
1904247_Proteos_005.RAW	AF-M	Artificial Fingerprint	High	Sequest HT	Sequest HT (A2)	A	2	Unambiguous	QGVDADINGLR	QGVDADInGLR	N8(Deamidated)	1	1	P35527	P35527	Keratin, type I cytoskeletal 9 OS=Homo sapiens OX=9606 GN=KRT9 PE=1 SV=3	0	2	2	0.4248	0	1	1	1	579.792	1158.58	1158.57	0.79	0.00046	0	0	23039748	HCD	MS2	0	20.469	72.8932	22823	22823	22822	0/0		2.66	1262	0.0007241	0.02423	0.247
1904247_Proteos_005.RAW	AF-M	Artificial Fingerprint	High	Sequest HT	Sequest HT (A2)	A	2	Unambiguous	GGSGGSHGGGSGFGGESGGSYGGGEEASGSGGGYGGGSGK	GGSGGSHGGGSGFGGESGGSYGGGEEASGSGGGYGGGSGK		1	1	P35527	P35527	Keratin, type I cytoskeletal 9 OS=Homo sapiens OX=9606 GN=KRT9 PE=1 SV=3	0	3	3	0.602	0	1	1	1	1075.1	3223.28	3223.28	-0.07	-8e-05	0	0	171972	HCD	MS2	0	50	72.9071	22827	22827	22825	0/0		2.94	3902	0	0.0006836	0.784
1904247_Proteos_005.RAW	AF-M	Artificial Fingerprint	High	Sequest HT	Sequest HT (A2)	A	2	Unambiguous	MSGECAPNVSVSVSTSHTTISGGGSR	mSGEcAPNVSVSVSTSHTTISGGGSR	M1(Oxidation); C5(Carbamidomethyl)	1	1	P04264	P04264	Keratin, type II cytoskeletal 1 OS=Homo sapiens OX=9606 GN=KRT1 PE=1 SV=6	0	3	3	0.473	0	1	1	1	861.059	2581.16	2581.16	0.1	9e-05	0	0	564785	HCD	MS2	0.498596	50	72.9162	22831	22831	22830	0/0		5.37	8930	0	0.0004295	0.854
1904247_Proteos_005.RAW	AF-M	Artificial Fingerprint	High	Sequest HT	Sequest HT (A2)	A	2	Unambiguous	FLEQQNQVLQTK	FLEQQNQVLQTK		2	3	P35908; P04264	Q7Z794; P35908; P04264	Keratin, type II cytoskeletal 1b OS=Homo sapiens OX=9606 GN=KRT77 PE=2 SV=3; Keratin, type II cytoskeletal 2 epidermal OS=Homo sapiens OX=9606 GN=KRT2 PE=1 SV=2; Keratin, type II cytoskeletal 1 OS=Homo sapiens OX=9606 GN=KRT1 PE=1 SV=6	0	2	2	0.4373	0	1	1	1	738.396	1475.78	1475.79	-0.29	-0.00022	0	0	801284	HCD	MS2	0	50	73.0042	22858	22858	22857	0/0		2.79	1296	0.0007241	0.005101	0.482
1904247_Proteos_005.RAW	AF-M	Artificial Fingerprint	High	Sequest HT	Sequest HT (A2)	A	2	Unambiguous	MTLDDFR	mTLDDFR	M1(Oxidation)	1	1	P35527	P35527	Keratin, type I cytoskeletal 9 OS=Homo sapiens OX=9606 GN=KRT9 PE=1 SV=3	0	2	2	0.4839	0	1	1	1	457.208	913.408	913.408	-0.02	-1e-05	0	0	515557	HCD	MS2	2.88424	50	73.0806	22876	22876	22875	0/0		2.17	892	0.0007241	0.008001	0.414
1904247_Proteos_005.RAW	AF-M	Artificial Fingerprint	High	Sequest HT	Sequest HT (A2)	A	2	Unambiguous	NMQDMVEDYR	NmQDMVEDYR	M2(Oxidation)	1	1	P04264	P04264	Keratin, type II cytoskeletal 1 OS=Homo sapiens OX=9606 GN=KRT1 PE=1 SV=6	0	2	2	0.1953	0	1	1	1	658.766	1316.52	1316.52	-0.17	-0.00011	0	0	736132	HCD	MS2	30.6453	50	73.1475	22897	22897	22896	0/0		2.15	1131	0.0007241	0.01855	0.288
1904247_Proteos_005.RAW	AF-M	Artificial Fingerprint	High	Sequest HT	Sequest HT (A2)	A	2	Unambiguous	TAAENEFVTLK	TAAENEFVTLK		2	4	P04259; A0A0S2Z428	P04259; A0A0S2Z428; P48668; P12035	Keratin, type II cytoskeletal 6B OS=Homo sapiens OX=9606 GN=KRT6B PE=1 SV=5; HCG2039812 OS=Homo sapiens (Human) OX=9606 GN=KRT6A hCG_2039812; Keratin, type II cytoskeletal 6C OS=Homo sapiens OX=9606 GN=KRT6C PE=1 SV=3; Keratin, type II cytoskeletal 3 OS=Homo sapiens OX=9606 GN=KRT3 PE=1 SV=3	0	2	2	0.4233	0	1	1	1	611.82	1222.63	1222.63	0.4	0.00024	0	0	152568	HCD	MS2	59.7411	50	73.176	22904	22904	22903	0/0		1.89	1182	0.002625	0.05361	0.127
1904247_Proteos_005.RAW	AF-M	Artificial Fingerprint	High	Sequest HT	Sequest HT (A2)	A	2	Selected	YEELQITAGR	YEELQITAGR		2	2	P04264; P04259	P04264; P04259	Keratin, type II cytoskeletal 1 OS=Homo sapiens OX=9606 GN=KRT1 PE=1 SV=6; Keratin, type II cytoskeletal 6B OS=Homo sapiens OX=9606 GN=KRT6B PE=1 SV=5	0	2	2	0	0	1	1	1	590.304	1179.6	1179.6	-0.03	-2e-05	0	0	577668	HCD	MS2	50.8228	50	73.1777	22905	22905	22903	0/0		2.22	1165	0.0007241	0.007069	0.433
1904247_Proteos_005.RAW	AF-M	Artificial Fingerprint	High	Sequest HT	Sequest HT (A2)	A	2	Rejected	YQELQITAGR	YqELQITAGR	Q2(Deamidated)	0	1		Q7Z794	Keratin, type II cytoskeletal 1b OS=Homo sapiens OX=9606 GN=KRT77 PE=2 SV=3	0	2	2		0	2	2	2	590.304	1179.6	1179.6	-0.03	-2e-05	0	0	577668	HCD	MS2	50.8228	50	73.1777	22905	22905	22903	0/0		2.22	1165	0.0007241	0.007069	0.433
1904247_Proteos_005.RAW	AF-M	Artificial Fingerprint	High	Sequest HT	Sequest HT (A2)	A	2	Unambiguous	QSLEASLAETEGR	QSLEASLAETEGR		1	1	P13645	P13645	Keratin, type I cytoskeletal 10 OS=Homo sapiens OX=9606 GN=KRT10 PE=1 SV=6	0	2	2	0.4485	0	1	1	1	695.844	1390.68	1390.68	-0.2	-0.00014	0	0	358359	HCD	MS2	12.8715	50	73.207	22913	22913	22912	0/0		3.01	1850	0	0.002814	0.571
1904247_Proteos_005.RAW	AF-M	Artificial Fingerprint	High	Sequest HT	Sequest HT (A2)	A	2	Unambiguous	GGSGGSYGGGSGSGGGSGGGYGGGSGGGHSGGSGGGHSGGSGGNYGGGSGSGGGSGGGYGGGSGSR	GGSGGSYGGGSGSGGGSGGGYGGGSGGGHSGGSGGGHSGGSGGNYGGGSGSGGGSGGGYGGGSGSR		1	1	P35527	P35527	Keratin, type I cytoskeletal 9 OS=Homo sapiens OX=9606 GN=KRT9 PE=1 SV=3	0	4	4	0.3224	0	1	1	1	1243.99	4972.94	4972.94	0.65	0.0008	0	0	53920.1	HCD	MS2	1.60476	50	73.4303	22974	22974	22973	0/0		2.14	1775	0.0007241	0.01484	0.321
1904247_Proteos_005.RAW	AF-M	Artificial Fingerprint	High	Sequest HT	Sequest HT (A2)	A	2	Unambiguous	NHKEEMSQLTGQNSGDVNVEINVAPGK	NHKEEmSQLTGQNSGDVNVEINVAPGK	M6(Oxidation)	1	1	P35527	P35527	Keratin, type I cytoskeletal 9 OS=Homo sapiens OX=9606 GN=KRT9 PE=1 SV=3	1	4	4	0.4722	0	1	1	1	728.602	2911.38	2911.39	-0.21	-0.00015	0	0	348036	HCD	MS2	1.03447	50	73.4509	22979	22979	22978	0/0		4.32	9737	0.0007241	0.003319	0.547
1904247_Proteos_005.RAW	AF-M	Artificial Fingerprint	High	Sequest HT	Sequest HT (A2)	A	2	Unambiguous	LLEGEDAHLSSSQFSSGSQSSR	LLEGEDAHLSSSQFSSGSQSSR		1	1	P02533	P02533	Keratin, type I cytoskeletal 14 OS=Homo sapiens OX=9606 GN=KRT14 PE=1 SV=4	0	3	3	0.5338	0	1	1	1	770.359	2309.06	2309.06	-0.12	-9e-05	0	0	1.94081e+06	HCD	MS2	0.20022	50	73.6229	23021	23021	23020	0/0		4.74	7343	0	0.0002477	0.937
1904247_Proteos_005.RAW	AF-M	Artificial Fingerprint	High	Sequest HT	Sequest HT (A2)	A	2	Unambiguous	VQALEEANNDLENK	VQALEEANnDLENK	N9(Deamidated)	1	1	P35527	P35527	Keratin, type I cytoskeletal 9 OS=Homo sapiens OX=9606 GN=KRT9 PE=1 SV=3	0	2	2	0.0137	0	1	1	1	794.378	1587.75	1587.75	-0.15	-0.00012	0	0	209060	HCD	MS2	6.5914	50	73.6583	23031	23031	23030	0/0		2.19	3007	0.0007241	0.004512	0.5
1904247_Proteos_005.RAW	AF-M	Artificial Fingerprint	High	Sequest HT	Sequest HT (A2)	A	2	Unambiguous	VQALEEANNDLENK	VQALEEAnNDLENK	N8(Deamidated)	1	1	P35527	P35527	Keratin, type I cytoskeletal 9 OS=Homo sapiens OX=9606 GN=KRT9 PE=1 SV=3	0	2	2		0.0137	2	2	2	794.378	1587.75	1587.75	-0.15	-0.00012	0	0	209060	HCD	MS2	6.5914	50	73.6583	23031	23031	23030	0/0		2.16	3007	0.0007241	0.004608	0.497
1904247_Proteos_005.RAW	AF-M	Artificial Fingerprint	High	Sequest HT	Sequest HT (A2)	A	2	Unambiguous	QGVDADINGLR	QGVDADInGLR	N8(Deamidated)	1	1	P35527	P35527	Keratin, type I cytoskeletal 9 OS=Homo sapiens OX=9606 GN=KRT9 PE=1 SV=3	0	2	2	0.4858	0	1	1	1	579.791	1158.58	1158.57	0.37	0.00021	0	0	4873256	HCD	MS2	0.452768	15.029	73.6881	23040	23040	23039	0/0		3.17	1265	0	0.001873	0.633
1904247_Proteos_005.RAW	AF-M	Artificial Fingerprint	High	Sequest HT	Sequest HT (A2)	A	2	Unambiguous	TNAENEFVTIK	TNAEnEFVTIK	N5(Deamidated)	1	1	P04264	P04264	Keratin, type II cytoskeletal 1 OS=Homo sapiens OX=9606 GN=KRT1 PE=1 SV=6	0	2	2	0.2815	0	1	1	1	633.814	1266.62	1266.62	-0.64	-0.00041	0	0	314549	HCD	MS2	16.2459	50	73.6895	23041	23041	23039	0/0		2.7	1539	0	0.002005	0.622
1904247_Proteos_005.RAW	AF-M	Artificial Fingerprint	High	Sequest HT	Sequest HT (A2)	A	2	Unambiguous	TAAENDFVTLK	TAAEnDFVTLK	N5(Deamidated)	1	1	P35908	P35908	Keratin, type II cytoskeletal 2 epidermal OS=Homo sapiens OX=9606 GN=KRT2 PE=1 SV=2	0	2	2	0.5	0	1	1	1	605.303	1209.6	1209.6	-0.08	-5e-05	0	0	1.6566e+06	HCD	MS2	4.86524	49.194	73.7432	23058	23058	23057	0/0		3.06	1502	0.0007241	0.004813	0.491
1904247_Proteos_005.RAW	AF-M	Artificial Fingerprint	High	Sequest HT	Sequest HT (A2)	A	2	Unambiguous	FSSCGGGGGSFGAGGGFGSR	FSScGGGGGSFGAGGGFGSR	C4(Carbamidomethyl)	1	1	P04264	P04264	Keratin, type II cytoskeletal 1 OS=Homo sapiens OX=9606 GN=KRT1 PE=1 SV=6	0	2	2	0.5576	0	1	1	1	883.371	1765.73	1765.73	-0.09	-8e-05	0	0	3.32302e+06	HCD	MS2	0	45.527	73.8153	23079	23079	23078	0/0		4.34	3177	0	9.165e-05	1.086
1904247_Proteos_005.RAW	AF-M	Artificial Fingerprint	High	Sequest HT	Sequest HT (A2)	A	2	Unambiguous	NVQDAIADAEQR	NVqDAIADAEQR	Q3(Deamidated)	1	1	P35908	P35908	Keratin, type II cytoskeletal 2 epidermal OS=Homo sapiens OX=9606 GN=KRT2 PE=1 SV=2	0	2	2	0.1493	0	1	1	1	665.815	1330.62	1330.62	0.08	6e-05	0	0	44516.5	HCD	MS2	40.0739	50	73.8183	23081	23081	23078	0/0		2.01	1908	0.0007241	0.01466	0.323
1904247_Proteos_005.RAW	AF-M	Artificial Fingerprint	High	Sequest HT	Sequest HT (A2)	A	2	Unambiguous	YEELQVTVGR	YEELQVTVGR		1	1	P35908	P35908	Keratin, type II cytoskeletal 2 epidermal OS=Homo sapiens OX=9606 GN=KRT2 PE=1 SV=2	0	2	2	0.4918	0	1	1	1	597.312	1193.62	1193.62	0.25	0.00015	0	0	453101	HCD	MS2	9.77391	50	73.8435	23086	23086	23085	0/0		2.44	1050	0	0.001299	0.688
1904247_Proteos_005.RAW	AF-M	Artificial Fingerprint	High	Sequest HT	Sequest HT (A2)	A	2	Unambiguous	GGSGGSHGGGSGFGGESGGSYGGGEEASGSGGGYGGGSGK	GGSGGSHGGGSGFGGESGGSYGGGEEASGSGGGYGGGSGK		1	1	P35527	P35527	Keratin, type I cytoskeletal 9 OS=Homo sapiens OX=9606 GN=KRT9 PE=1 SV=3	0	3	3	0.6429	0	1	1	1	1075.1	3223.28	3223.28	-0.41	-0.00044	0	0	129022	HCD	MS2	0	50	73.9121	23104	23104	23103	0/0		3.64	3894	0	0.0001045	1.066
1904247_Proteos_005.RAW	AF-M	Artificial Fingerprint	High	Sequest HT	Sequest HT (A2)	A	2	Unambiguous	MSGECAPNVSVSVSTSHTTISGGGSR	mSGEcAPNVSVSVSTSHTTISGGGSR	M1(Oxidation); C5(Carbamidomethyl)	1	1	P04264	P04264	Keratin, type II cytoskeletal 1 OS=Homo sapiens OX=9606 GN=KRT1 PE=1 SV=6	0	3	3	0.4533	0	1	1	1	861.058	2581.16	2581.16	-0.33	-0.00028	0	0	279662	HCD	MS2	0	50	73.9187	23106	23106	23105	0/0		4.5	8826	0	3.866e-05	1.216
1904247_Proteos_005.RAW	AF-M	Artificial Fingerprint	High	Sequest HT	Sequest HT (A2)	A	2	Unambiguous	FLEQQNQVLQTK	FLEQQNQVLQTK		2	3	P35908; P04264	Q7Z794; P35908; P04264	Keratin, type II cytoskeletal 1b OS=Homo sapiens OX=9606 GN=KRT77 PE=2 SV=3; Keratin, type II cytoskeletal 2 epidermal OS=Homo sapiens OX=9606 GN=KRT2 PE=1 SV=2; Keratin, type II cytoskeletal 1 OS=Homo sapiens OX=9606 GN=KRT1 PE=1 SV=6	0	2	2	0.4436	0	1	1	1	738.396	1475.78	1475.79	-0.29	-0.00022	0	0	440977	HCD	MS2	1.97009	50	74.0074	23129	23129	23128	0/0		2.57	1296	0.0007241	0.003964	0.52
1904247_Proteos_005.RAW	AF-M	Artificial Fingerprint	High	Sequest HT	Sequest HT (A2)	A	2	Unambiguous	MTLDDFR	mTLDDFR	M1(Oxidation)	1	1	P35527	P35527	Keratin, type I cytoskeletal 9 OS=Homo sapiens OX=9606 GN=KRT9 PE=1 SV=3	0	2	2	0.4798	0	1	1	1	457.208	913.408	913.408	-0.16	-7e-05	0	0	496739	HCD	MS2	5.44428	50	74.0825	23152	23152	23151	0/0		1.73	893	0.0007241	0.01646	0.306
1904247_Proteos_005.RAW	AF-M	Artificial Fingerprint	High	Sequest HT	Sequest HT (A2)	A	2	Unambiguous	NMQDMVEDYR	NmQDMVEDYR	M2(Oxidation)	1	1	P04264	P04264	Keratin, type II cytoskeletal 1 OS=Homo sapiens OX=9606 GN=KRT1 PE=1 SV=6	0	2	2	0.3968	0	1	1	1	658.766	1316.52	1316.52	0.02	1e-05	0	0	352889	HCD	MS2	7.59629	50	74.1504	23170	23170	23169	0/0		1.89	1143	0.0007241	0.00661	0.443
1904247_Proteos_005.RAW	AF-M	Artificial Fingerprint	High	Sequest HT	Sequest HT (A2)	A	2	Unambiguous	NMQDMVEDYR	NMQDmVEDYR	M5(Oxidation)	1	1	P04264	P04264	Keratin, type II cytoskeletal 1 OS=Homo sapiens OX=9606 GN=KRT1 PE=1 SV=6	0	2	2	0.3968	0	1	2	2	658.766	1316.52	1316.52	0.02	1e-05	0	0	352889	HCD	MS2	7.59629	50	74.1504	23170	23170	23169	0/0		1.89	1143	0.0007241	0.00702	0.434
1904247_Proteos_005.RAW	AF-M	Artificial Fingerprint	High	Sequest HT	Sequest HT (A2)	A	2	Unambiguous	QSLEASLAETEGR	QSLEASLAETEGR		1	1	P13645	P13645	Keratin, type I cytoskeletal 10 OS=Homo sapiens OX=9606 GN=KRT10 PE=1 SV=6	0	2	2	0.3581	0	1	1	1	695.844	1390.68	1390.68	-0.37	-0.00026	0	0	78803.2	HCD	MS2	9.23751	50	74.2082	23187	23187	23186	0/0		1.48	1847	0.002625	0.05621	0.12
1904247_Proteos_005.RAW	AF-M	Artificial Fingerprint	High	Sequest HT	Sequest HT (A2)	A	2	Rejected	YQELQITAGR	YqELQITAGR	Q2(Deamidated)	0	1		Q7Z794	Keratin, type II cytoskeletal 1b OS=Homo sapiens OX=9606 GN=KRT77 PE=2 SV=3	0	2	2	0	0	1	1	1	590.304	1179.6	1179.6	0.17	0.0001	0	0	431406	HCD	MS2	47.8192	50	74.3663	23235	23235	23234	0/0		2.17	1165	0	0.002892	0.567
1904247_Proteos_005.RAW	AF-M	Artificial Fingerprint	High	Sequest HT	Sequest HT (A2)	A	2	Selected	YEELQITAGR	YEELQITAGR		2	2	P04264; P04259	P04264; P04259	Keratin, type II cytoskeletal 1 OS=Homo sapiens OX=9606 GN=KRT1 PE=1 SV=6; Keratin, type II cytoskeletal 6B OS=Homo sapiens OX=9606 GN=KRT6B PE=1 SV=5	0	2	2		0	2	2	2	590.304	1179.6	1179.6	0.17	0.0001	0	0	431406	HCD	MS2	47.8192	50	74.3663	23235	23235	23234	0/0		2.17	1165	0	0.002892	0.567
1904247_Proteos_005.RAW	AF-M	Artificial Fingerprint	High	Sequest HT	Sequest HT (A2)	A	2	Unambiguous	FSSCGGGGGSFGAGGGFGSR	FSScGGGGGSFGAGGGFGSR	C4(Carbamidomethyl)	1	1	P04264	P04264	Keratin, type II cytoskeletal 1 OS=Homo sapiens OX=9606 GN=KRT1 PE=1 SV=6	0	3	3	0.061	0	1	1	1	589.25	1765.73	1765.73	-0.1	-6e-05	0	0	372711	HCD	MS2	30.2978	50	74.391	23244	23244	23243	0/0		1.64	3177	0.006757	0.08933	0.048
1904247_Proteos_005.RAW	AF-M	Artificial Fingerprint	High	Sequest HT	Sequest HT (A2)	A	2	Unambiguous	NHKEEMSQLTGQNSGDVNVEINVAPGK	NHKEEmSQLTGQNSGDVNVEINVAPGK	M6(Oxidation)	1	1	P35527	P35527	Keratin, type I cytoskeletal 9 OS=Homo sapiens OX=9606 GN=KRT9 PE=1 SV=3	1	4	4	0.3667	0	1	1	1	728.602	2911.39	2911.39	0.29	0.00021	0	0	234181	HCD	MS2	1.28387	50	74.4613	23268	23268	23267	0/0		3.3	9618	0.0007241	0.008764	0.401
1904247_Proteos_005.RAW	AF-M	Artificial Fingerprint	High	Sequest HT	Sequest HT (A2)	A	2	Unambiguous	LLEGEDAHLSSSQFSSGSQSSR	LLEGEDAHLSSSQFSSGSQSSR		1	1	P02533	P02533	Keratin, type I cytoskeletal 14 OS=Homo sapiens OX=9606 GN=KRT14 PE=1 SV=4	0	3	3	0.4199	0	1	1	1	770.359	2309.06	2309.06	-0.27	-0.00021	0	0	180974	HCD	MS2	0	50	74.6295	23314	23314	23313	0/0		2.31	7365	0.001797	0.03599	0.188
1904247_Proteos_005.RAW	AF-M	Artificial Fingerprint	High	Sequest HT	Sequest HT (A2)	A	2	Unambiguous	QGVDADINGLR	QGVDADInGLR	N8(Deamidated)	1	1	P35527	P35527	Keratin, type I cytoskeletal 9 OS=Homo sapiens OX=9606 GN=KRT9 PE=1 SV=3	0	2	2	0.4459	0	1	1	1	579.791	1158.58	1158.57	0.15	9e-05	0	0	1.83681e+06	HCD	MS2	1.40291	40.809	74.6954	23334	23334	23333	0/0		3.05	1265	0	0.001877	0.632
1904247_Proteos_005.RAW	AF-M	Artificial Fingerprint	High	Sequest HT	Sequest HT (A2)	A	2	Unambiguous	TNAENEFVTIK	TnAEnEFVTIK	N2(Deamidated); N5(Deamidated)	1	1	P04264	P04264	Keratin, type II cytoskeletal 1 OS=Homo sapiens OX=9606 GN=KRT1 PE=1 SV=6	0	2	2	0.4393	0	1	1	1	634.308	1267.61	1267.61	2.63	0.00166	0	0	99562.7	HCD	MS2	45.8986	50	74.7303	23344	23344	23343	0/0		2.14	1776	0.0007241	0.0061	0.455
1904247_Proteos_005.RAW	AF-M	Artificial Fingerprint	High	Sequest HT	Sequest HT (A2)	A	2	Unambiguous	TAAENDFVTLK	TAAEnDFVTLK	N5(Deamidated)	1	1	P35908	P35908	Keratin, type II cytoskeletal 2 epidermal OS=Homo sapiens OX=9606 GN=KRT2 PE=1 SV=2	0	2	2	0.524	0	1	1	1	605.303	1209.6	1209.6	-0.29	-0.00017	0	0	421431	HCD	MS2	13.862	50	74.7511	23350	23350	23349	0/0		2.5	1504	0.0007241	0.004852	0.49
1904247_Proteos_005.RAW	AF-M	Artificial Fingerprint	High	Sequest HT	Sequest HT (A2)	A	2	Unambiguous	TEELNKEVASNSELVQSSR	TEELnKEVASNSELVQSSR	N5(Deamidated)	1	1	P08779	P08779	Keratin, type I cytoskeletal 16 OS=Homo sapiens OX=9606 GN=KRT16 PE=1 SV=4	1	3	3	0.2611	0	1	1	1	707.682	2121.03	2121.03	-0.11	-8e-05	0	0	85798.1	HCD	MS2	8.47968	50	74.8161	23365	23365	23364	0/0		2.03	5002	0.0007241	0.02121	0.268
1904247_Proteos_005.RAW	AF-M	Artificial Fingerprint	High	Sequest HT	Sequest HT (A2)	A	2	Unambiguous	TEELNKEVASNSELVQSSR	TEELNKEVASnSELVQSSR	N11(Deamidated)	1	1	P08779	P08779	Keratin, type I cytoskeletal 16 OS=Homo sapiens OX=9606 GN=KRT16 PE=1 SV=4	1	3	3	0.2611	0	1	2	2	707.682	2121.03	2121.03	-0.11	-8e-05	0	0	85798.1	HCD	MS2	8.47968	50	74.8161	23365	23365	23364	0/0		2.03	5002	0.0007241	0.02128	0.267
1904247_Proteos_005.RAW	AF-M	Artificial Fingerprint	High	Sequest HT	Sequest HT (A2)	A	2	Unambiguous	FSSCGGGGGSFGAGGGFGSR	FSScGGGGGSFGAGGGFGSR	C4(Carbamidomethyl)	1	1	P04264	P04264	Keratin, type II cytoskeletal 1 OS=Homo sapiens OX=9606 GN=KRT1 PE=1 SV=6	0	2	2	0.5318	0	1	1	1	883.371	1765.73	1765.73	-0.16	-0.00014	0	0	1.54372e+06	HCD	MS2	0.357416	50	74.8244	23368	23368	23367	0/0		4.25	3171	0	7.083e-05	1.125
1904247_Proteos_005.RAW	AF-M	Artificial Fingerprint	High	Sequest HT	Sequest HT (A2)	A	2	Unambiguous	YEELQVTVGR	YEELQVTVGR		1	1	P35908	P35908	Keratin, type II cytoskeletal 2 epidermal OS=Homo sapiens OX=9606 GN=KRT2 PE=1 SV=2	0	2	2	0.4928	0	1	1	1	597.312	1193.62	1193.62	0.05	3e-05	0	0	163730	HCD	MS2	14.0912	50	74.845	23373	23373	23372	0/0		2.09	1060	0	0.002177	0.61
1904247_Proteos_005.RAW	AF-M	Artificial Fingerprint	High	Sequest HT	Sequest HT (A2)	A	2	Unambiguous	GGSGGSHGGGSGFGGESGGSYGGGEEASGSGGGYGGGSGK	GGSGGSHGGGSGFGGESGGSYGGGEEASGSGGGYGGGSGK		1	1	P35527	P35527	Keratin, type I cytoskeletal 9 OS=Homo sapiens OX=9606 GN=KRT9 PE=1 SV=3	0	3	3	0.639	0	1	1	1	1075.1	3223.28	3223.28	0.61	0.00066	0	0	106362	HCD	MS2	0	50	74.9172	23395	23395	23394	0/0		3.49	4132	0	0.00206	0.618
1904247_Proteos_005.RAW	AF-M	Artificial Fingerprint	High	Sequest HT	Sequest HT (A2)	A	2	Unambiguous	MSGECAPNVSVSVSTSHTTISGGGSR	mSGEcAPNVSVSVSTSHTTISGGGSR	M1(Oxidation); C5(Carbamidomethyl)	1	1	P04264	P04264	Keratin, type II cytoskeletal 1 OS=Homo sapiens OX=9606 GN=KRT1 PE=1 SV=6	0	3	3	0.495	0	1	1	1	861.058	2581.16	2581.16	-0.54	-0.00046	0	0	171536	HCD	MS2	1.5386	50	74.9238	23397	23397	23396	0/0		4.02	8852	0	0.0004473	0.848
1904247_Proteos_005.RAW	AF-M	Artificial Fingerprint	High	Sequest HT	Sequest HT (A2)	A	2	Unambiguous	TLLDIDNTR	TLLDIDNTR		1	1	P35527	P35527	Keratin, type I cytoskeletal 9 OS=Homo sapiens OX=9606 GN=KRT9 PE=1 SV=3	0	2	2	0.2636	0	1	1	1	530.785	1060.56	1060.56	-0.26	-0.00014	0	0	64950.2	HCD	MS2	29.4917	50	74.9426	23401	23401	23400	0/0		1.1	1200	0.001797	0.04389	0.157
1904247_Proteos_005.RAW	AF-M	Artificial Fingerprint	High	Sequest HT	Sequest HT (A2)	A	2	Unambiguous	MSGECAPNVSVSVSTSHTTISGGGSR	MSGEcAPNVSVSVSTSHTTISGGGSR	C5(Carbamidomethyl)	1	1	P04264	P04264	Keratin, type II cytoskeletal 1 OS=Homo sapiens OX=9606 GN=KRT1 PE=1 SV=6	0	2	2	0.5121	0	1	1	1	1283.09	2565.17	2565.17	1.43	0.00183	0	0	41502.3	HCD	MS2	0	50	74.96	23407	23407	23405	0/0		2.07	9157	0.00363	0.07048	0.085
1904247_Proteos_005.RAW	AF-M	Artificial Fingerprint	High	Sequest HT	Sequest HT (A2)	A	2	Unambiguous	MSGECAPNVSVSVSTSHTTISGGGSR	MSGEcAPNVSVSVSTSHTTISGGGSR	C5(Carbamidomethyl)	1	1	P04264	P04264	Keratin, type II cytoskeletal 1 OS=Homo sapiens OX=9606 GN=KRT1 PE=1 SV=6	0	3	3	0.5746	0	1	1	1	855.727	2565.17	2565.17	0.07	6e-05	0	0	3.88761e+06	HCD	MS2	2.07342	45.407	74.9871	23415	23415	23414	0/0		5.9	9136	0	1.676e-05	1.341
1904247_Proteos_005.RAW	AF-M	Artificial Fingerprint	High	Sequest HT	Sequest HT (A2)	A	2	Unambiguous	FLEQQNQVLQTK	FLEQQnQVLQTK	N6(Deamidated)	2	3	P35908; P04264	Q7Z794; P35908; P04264	Keratin, type II cytoskeletal 1b OS=Homo sapiens OX=9606 GN=KRT77 PE=2 SV=3; Keratin, type II cytoskeletal 2 epidermal OS=Homo sapiens OX=9606 GN=KRT2 PE=1 SV=2; Keratin, type II cytoskeletal 1 OS=Homo sapiens OX=9606 GN=KRT1 PE=1 SV=6	0	2	2	0.0173	0	1	1	1	738.889	1476.77	1476.77	0.45	0.00033	0	0	1.65651e+06	HCD	MS2	11.6345	50	75.012	23420	23420	23419	0/0		2.89	1582	0.0007241	0.006117	0.455
1904247_Proteos_005.RAW	AF-M	Artificial Fingerprint	High	Sequest HT	Sequest HT (A2)	A	2	Unambiguous	FLEQQNQVLQTK	FLEQQNqVLQTK	Q7(Deamidated)	2	3	P35908; P04264	Q7Z794; P35908; P04264	Keratin, type II cytoskeletal 1b OS=Homo sapiens OX=9606 GN=KRT77 PE=2 SV=3; Keratin, type II cytoskeletal 2 epidermal OS=Homo sapiens OX=9606 GN=KRT2 PE=1 SV=2; Keratin, type II cytoskeletal 1 OS=Homo sapiens OX=9606 GN=KRT1 PE=1 SV=6	0	2	2		0.0173	2	2	2	738.889	1476.77	1476.77	0.45	0.00033	0	0	1.65651e+06	HCD	MS2	11.6345	50	75.012	23420	23420	23419	0/0		2.84	1582	0.0007241	0.006521	0.445
1904247_Proteos_005.RAW	AF-M	Artificial Fingerprint	High	Sequest HT	Sequest HT (A2)	A	2	Unambiguous	FLEQQNQVLQTK	FLEQqNQVLQTK	Q5(Deamidated)	2	3	P35908; P04264	Q7Z794; P35908; P04264	Keratin, type II cytoskeletal 1b OS=Homo sapiens OX=9606 GN=KRT77 PE=2 SV=3; Keratin, type II cytoskeletal 2 epidermal OS=Homo sapiens OX=9606 GN=KRT2 PE=1 SV=2; Keratin, type II cytoskeletal 1 OS=Homo sapiens OX=9606 GN=KRT1 PE=1 SV=6	0	2	2		0.0346	3	3	3	738.889	1476.77	1476.77	0.45	0.00033	0	0	1.65651e+06	HCD	MS2	11.6345	50	75.012	23420	23420	23419	0/0		2.79	1582	0.0007241	0.006902	0.437
1904247_Proteos_005.RAW	AF-M	Artificial Fingerprint	High	Sequest HT	Sequest HT (A2)	A	2	Unambiguous	TTAENEFVMLK	TTAENEFVmLK	M9(Oxidation)	1	1	P13647	P13647	Keratin, type II cytoskeletal 5 OS=Homo sapiens OX=9606 GN=KRT5 PE=1 SV=3	0	2	2	0.3254	0	1	1	1	649.818	1298.63	1298.63	0.01	0	0	0	330322	HCD	MS2	4.02715	50	75.0591	23436	23436	23435	0/0		1.69	1887	0.002625	0.05835	0.114
1904247_Proteos_005.RAW	AF-M	Artificial Fingerprint	High	Sequest HT	Sequest HT (A2)	A	2	Unambiguous	MTLDDFR	mTLDDFR	M1(Oxidation)	1	1	P35527	P35527	Keratin, type I cytoskeletal 9 OS=Homo sapiens OX=9606 GN=KRT9 PE=1 SV=3	0	2	2	0.5397	0	1	1	1	457.208	913.408	913.408	0.04	2e-05	0	0	405525	HCD	MS2	1.10863	50	75.0849	23446	23446	23445	0/0		1.89	892	0.0007241	0.02259	0.258
1904247_Proteos_005.RAW	AF-M	Artificial Fingerprint	High	Sequest HT	Sequest HT (A2)	A	2	Unambiguous	NMQDMVEDYR	NmQDMVEDYR	M2(Oxidation)	1	1	P04264	P04264	Keratin, type II cytoskeletal 1 OS=Homo sapiens OX=9606 GN=KRT1 PE=1 SV=6	0	2	2	0.0055	0	1	1	1	658.766	1316.52	1316.52	-0.17	-0.00011	0	0	266468	HCD	MS2	10.6644	50	75.1533	23467	23467	23466	0/0		1.82	1131	0.0007241	0.008832	0.399
1904247_Proteos_005.RAW	AF-M	Artificial Fingerprint	High	Sequest HT	Sequest HT (A2)	A	2	Unambiguous	NMQDMVEDYR	NMQDmVEDYR	M5(Oxidation)	1	1	P04264	P04264	Keratin, type II cytoskeletal 1 OS=Homo sapiens OX=9606 GN=KRT1 PE=1 SV=6	0	2	2		0.0055	2	2	2	658.766	1316.52	1316.52	-0.17	-0.00011	0	0	266468	HCD	MS2	10.6644	50	75.1533	23467	23467	23466	0/0		1.81	1131	0.0007241	0.02145	0.266
1904247_Proteos_005.RAW	AF-M	Artificial Fingerprint	High	Sequest HT	Sequest HT (A2)	A	2	Unambiguous	QVLDNLTMEK	QVLDNLTmEK	M8(Oxidation)	1	1	P35527	P35527	Keratin, type I cytoskeletal 9 OS=Homo sapiens OX=9606 GN=KRT9 PE=1 SV=3	0	2	2	0.2676	0	1	1	1	603.806	1206.6	1206.6	1.09	0.00066	0	0	158776	HCD	MS2	13.5527	50	75.3598	23534	23534	23532	0/0		1.42	1340	0.002625	0.06261	0.103
1904247_Proteos_005.RAW	AF-M	Artificial Fingerprint	High	Sequest HT	Sequest HT (A2)	A	2	Unambiguous	VDELEAALR	VDELEAALR		1	1	Q8N1N4	Q8N1N4	Keratin, type II cytoskeletal 78 OS=Homo sapiens OX=9606 GN=KRT78 PE=1 SV=2	0	2	2	0.3529	0	1	1	1	508.275	1015.54	1015.54	0.73	0.00037	0	0	100414	HCD	MS2	25.4731	50	75.5223	23584	23584	23583	0/0		1.87	840	0.001797	0.04142	0.166
1904247_Proteos_005.RAW	AF-M	Artificial Fingerprint	High	Sequest HT	Sequest HT (A2)	A	2	Unambiguous	VQALEEANNDLENK	VQALEEANnDLENK	N9(Deamidated)	1	1	P35527	P35527	Keratin, type I cytoskeletal 9 OS=Homo sapiens OX=9606 GN=KRT9 PE=1 SV=3	0	2	2	0.0718	0	1	1	1	794.378	1587.75	1587.75	-0.45	-0.00036	0	0	100744	HCD	MS2	0	50	75.6794	23630	23630	23629	0/0		1.81	2984	0.007067	0.09123	0.045
1904247_Proteos_005.RAW	AF-M	Artificial Fingerprint	High	Sequest HT	Sequest HT (A2)	A	2	Unambiguous	QGVDADINGLR	QGVDADInGLR	N8(Deamidated)	1	1	P35527	P35527	Keratin, type I cytoskeletal 9 OS=Homo sapiens OX=9606 GN=KRT9 PE=1 SV=3	0	2	2	0.4495	0	1	1	1	579.791	1158.58	1158.57	0.05	3e-05	0	0	1.04813e+06	HCD	MS2	3.60404	50	75.7026	23638	23638	23637	0/0		2.87	1263	0.0007241	0.01149	0.36
1904247_Proteos_005.RAW	AF-M	Artificial Fingerprint	High	Sequest HT	Sequest HT (A2)	A	2	Unambiguous	TNAENEFVTIK	TnAENEFVTIK	N2(Deamidated)	1	1	P04264	P04264	Keratin, type II cytoskeletal 1 OS=Homo sapiens OX=9606 GN=KRT1 PE=1 SV=6	0	2	2	0.1414	0	1	1	1	633.814	1266.62	1266.62	-0.55	-0.00035	0	0	171036	HCD	MS2	20.5952	50	75.7039	23639	23639	23637	0/0		1.91	1539	0.001797	0.03814	0.179
1904247_Proteos_005.RAW	AF-M	Artificial Fingerprint	High	Sequest HT	Sequest HT (A2)	A	2	Unambiguous	TAAENDFVTLK	TAAEnDFVTLK	N5(Deamidated)	1	1	P35908	P35908	Keratin, type II cytoskeletal 2 epidermal OS=Homo sapiens OX=9606 GN=KRT2 PE=1 SV=2	0	2	2	0.5389	0	1	1	1	605.305	1209.6	1209.6	2.84	0.00172	0	0	271711	HCD	MS2	7.16463	50	75.7623	23663	23663	23662	0/0		1.8	1547	0.002625	0.06232	0.104
1904247_Proteos_005.RAW	AF-M	Artificial Fingerprint	High	Sequest HT	Sequest HT (A2)	A	2	Rejected	YQELQITAGR	YqELQITAGR	Q2(Deamidated)	0	1		Q7Z794	Keratin, type II cytoskeletal 1b OS=Homo sapiens OX=9606 GN=KRT77 PE=2 SV=3	0	2	2	0	0	1	1	1	590.304	1179.6	1179.6	0.38	0.00022	0	0	347881	HCD	MS2	6.90323	50	75.7822	23670	23670	23669	0/0		2.4	1165	0	0.001194	0.7
1904247_Proteos_005.RAW	AF-M	Artificial Fingerprint	High	Sequest HT	Sequest HT (A2)	A	2	Selected	YEELQITAGR	YEELQITAGR		2	2	P04264; P04259	P04264; P04259	Keratin, type II cytoskeletal 1 OS=Homo sapiens OX=9606 GN=KRT1 PE=1 SV=6; Keratin, type II cytoskeletal 6B OS=Homo sapiens OX=9606 GN=KRT6B PE=1 SV=5	0	2	2		0	2	2	2	590.304	1179.6	1179.6	0.38	0.00022	0	0	347881	HCD	MS2	6.90323	50	75.7822	23670	23670	23669	0/0		2.4	1165	0	0.001194	0.7
1904247_Proteos_005.RAW	AF-M	Artificial Fingerprint	High	Sequest HT	Sequest HT (A2)	A	2	Unambiguous	FSSCGGGGGSFGAGGGFGSR	FSScGGGGGSFGAGGGFGSR	C4(Carbamidomethyl)	1	1	P04264	P04264	Keratin, type II cytoskeletal 1 OS=Homo sapiens OX=9606 GN=KRT1 PE=1 SV=6	0	2	2	0.5816	0	1	1	1	883.372	1765.74	1765.73	0.6	0.00053	0	0	1.26106e+06	HCD	MS2	0	50	75.8306	23686	23686	23685	0/0		4.35	3263	0	3.868e-05	1.216
1904247_Proteos_005.RAW	AF-M	Artificial Fingerprint	High	Sequest HT	Sequest HT (A2)	A	2	Unambiguous	FSSCGGGGGSFGAGGGFGSR	FSScGGGGGSFGAGGGFGSR	C4(Carbamidomethyl)	1	1	P04264	P04264	Keratin, type II cytoskeletal 1 OS=Homo sapiens OX=9606 GN=KRT1 PE=1 SV=6	0	3	3	0.2978	0	1	1	1	589.248	1765.73	1765.73	-3.11	-0.00183	0	0	317271	HCD	MS2	0	50	75.8762	23699	23699	23698	0/0		1.78	3007	0.0007241	0.02509	0.242
1904247_Proteos_005.RAW	AF-M	Artificial Fingerprint	High	Sequest HT	Sequest HT (A2)	A	2	Unambiguous	MSGECAPNVSVSVSTSHTTISGGGSR	mSGEcAPnVSVSVSTSHTTISGGGSR	M1(Oxidation); C5(Carbamidomethyl); N8(Deamidated)	1	1	P04264	P04264	Keratin, type II cytoskeletal 1 OS=Homo sapiens OX=9606 GN=KRT1 PE=1 SV=6	0	3	3	0.4558	0	1	1	1	861.392	2582.16	2582.15	5.7	0.0049	0	0	133638	HCD	MS2	29.1199	50	75.9289	23715	23715	23714	0/0		2.83	9490	0.002625	0.0574	0.116
1904247_Proteos_005.RAW	AF-M	Artificial Fingerprint	High	Sequest HT	Sequest HT (A2)	A	2	Unambiguous	MSGECAPNVSVSVSTSHTTISGGGSR	MSGEcAPnVSVSVSTSHTTISGGGSR	C5(Carbamidomethyl); N8(Deamidated)	1	1	P04264	P04264	Keratin, type II cytoskeletal 1 OS=Homo sapiens OX=9606 GN=KRT1 PE=1 SV=6	0	2	2	0.5305	0	1	1	1	1283.59	2566.17	2566.15	9.09	0.01166	0	0	132977	HCD	MS2	36.9551	50	75.9679	23726	23726	23725	0/0		2.62	9229	0	0.001388	0.678
1904247_Proteos_005.RAW	AF-M	Artificial Fingerprint	High	Sequest HT	Sequest HT (A2)	A	2	Unambiguous	MSGECAPNVSVSVSTSHTTISGGGSR	MSGEcAPNVSVSVSTSHTTISGGGSR	C5(Carbamidomethyl)	1	1	P04264	P04264	Keratin, type II cytoskeletal 1 OS=Homo sapiens OX=9606 GN=KRT1 PE=1 SV=6	0	3	3	0.5597	0	1	1	1	855.727	2565.17	2565.17	-0.57	-0.00049	0	0	3.69496e+06	HCD	MS2	3.156	44.68	75.9908	23733	23733	23732	0/0		5.95	9091	0	0.0003082	0.904
1904247_Proteos_005.RAW	AF-M	Artificial Fingerprint	High	Sequest HT	Sequest HT (A2)	A	2	Unambiguous	FLEQQNQVLQTK	FLEqQNQVLQTK	Q4(Deamidated)	2	3	P35908; P04264	Q7Z794; P35908; P04264	Keratin, type II cytoskeletal 1b OS=Homo sapiens OX=9606 GN=KRT77 PE=2 SV=3; Keratin, type II cytoskeletal 2 epidermal OS=Homo sapiens OX=9606 GN=KRT2 PE=1 SV=2; Keratin, type II cytoskeletal 1 OS=Homo sapiens OX=9606 GN=KRT1 PE=1 SV=6	0	2	2	0.0223	0	1	1	1	738.89	1476.77	1476.77	2.76	0.00204	0	0	344847	HCD	MS2	27.3586	50	76.0229	23743	23743	23741	0/0		2.69	1549	0.0007241	0.0131	0.34
1904247_Proteos_005.RAW	AF-M	Artificial Fingerprint	High	Sequest HT	Sequest HT (A2)	A	2	Unambiguous	FLEQQNQVLQTK	FLEQqNQVLQTK	Q5(Deamidated)	2	3	P35908; P04264	Q7Z794; P35908; P04264	Keratin, type II cytoskeletal 1b OS=Homo sapiens OX=9606 GN=KRT77 PE=2 SV=3; Keratin, type II cytoskeletal 2 epidermal OS=Homo sapiens OX=9606 GN=KRT2 PE=1 SV=2; Keratin, type II cytoskeletal 1 OS=Homo sapiens OX=9606 GN=KRT1 PE=1 SV=6	0	2	2		0.0223	2	2	2	738.89	1476.77	1476.77	2.76	0.00204	0	0	344847	HCD	MS2	27.3586	50	76.0229	23743	23743	23741	0/0		2.63	1549	0.0007241	0.02621	0.236
1904247_Proteos_005.RAW	AF-M	Artificial Fingerprint	High	Sequest HT	Sequest HT (A2)	A	2	Unambiguous	FLEQQNQVLQTK	FLEQQnQVLQTK	N6(Deamidated)	2	3	P35908; P04264	Q7Z794; P35908; P04264	Keratin, type II cytoskeletal 1b OS=Homo sapiens OX=9606 GN=KRT77 PE=2 SV=3; Keratin, type II cytoskeletal 2 epidermal OS=Homo sapiens OX=9606 GN=KRT2 PE=1 SV=2; Keratin, type II cytoskeletal 1 OS=Homo sapiens OX=9606 GN=KRT1 PE=1 SV=6	0	2	2		0.0297	3	3	3	738.89	1476.77	1476.77	2.76	0.00204	0	0	344847	HCD	MS2	27.3586	50	76.0229	23743	23743	23741	0/0		2.61	1549	0.0007241	0.02649	0.234
1904247_Proteos_005.RAW	AF-M	Artificial Fingerprint	High	Sequest HT	Sequest HT (A2)	A	2	Unambiguous	NMQDMVEDYR	NmQDMVEDYR	M2(Oxidation)	1	1	P04264	P04264	Keratin, type II cytoskeletal 1 OS=Homo sapiens OX=9606 GN=KRT1 PE=1 SV=6	0	2	2	0.1885	0	1	1	1	658.766	1316.52	1316.52	-0.45	-0.00029	0	0	444544	HCD	MS2	6.13185	50	76.154	23781	23781	23780	0/0		1.91	1112	0.0007241	0.009611	0.387
1904247_Proteos_005.RAW	AF-M	Artificial Fingerprint	High	Sequest HT	Sequest HT (A2)	A	2	Unambiguous	MTLDDFR	mTLDDFR	M1(Oxidation)	1	1	P35527	P35527	Keratin, type I cytoskeletal 9 OS=Homo sapiens OX=9606 GN=KRT9 PE=1 SV=3	0	2	2	0.4094	0	1	1	1	457.207	913.407	913.408	-1.49	-0.00068	0	0	267719	HCD	MS2	38.8804	50	76.2105	23798	23798	23797	0/0		1.71	986	0.009708	0.1072	0.019
1904247_Proteos_005.RAW	AF-M	Artificial Fingerprint	High	Sequest HT	Sequest HT (A2)	A	2	Unambiguous	QVLDNLTMEK	QVLDNLTmEK	M8(Oxidation)	1	1	P35527	P35527	Keratin, type I cytoskeletal 9 OS=Homo sapiens OX=9606 GN=KRT9 PE=1 SV=3	0	2	2	0.3677	0	1	1	1	603.803	1206.6	1206.6	-3.26	-0.00196	0	0	174310	HCD	MS2	9.11907	50	76.3656	23841	23841	23840	0/0		1.55	1393	0.002625	0.05406	0.126
1904247_Proteos_005.RAW	AF-M	Artificial Fingerprint	High	Sequest HT	Sequest HT (A2)	A	2	Unambiguous	SFSTASAITPSVSR	SFSTASAITPSVSR		1	1	P13647	P13647	Keratin, type II cytoskeletal 5 OS=Homo sapiens OX=9606 GN=KRT5 PE=1 SV=3	0	2	2	0.6554	0	1	1	1	705.864	1410.72	1410.72	-0.52	-0.00036	0	0	304762	HCD	MS2	0	50	76.5662	23915	23915	23914	0/0		2.67	1649	0.0007241	0.006803	0.439
1904247_Proteos_005.RAW	AF-M	Artificial Fingerprint	High	Sequest HT	Sequest HT (A2)	A	2	Unambiguous	AYLEEECPATLR	AYLEEEcPATLR	C7(Carbamidomethyl)	1	1	P25311	P25311	Zinc-alpha-2-glycoprotein OS=Homo sapiens OX=9606 GN=AZGP1 PE=1 SV=2	0	2	2	0.4133	0	1	1	1	726.344	1451.68	1451.68	-2.01	-0.00146	0	0	80564.6	HCD	MS2	0	50	76.6477	23941	23941	23939	0/0		1.5	2020	0.002625	0.06171	0.105
1904247_Proteos_005.RAW	AF-M	Artificial Fingerprint	High	Sequest HT	Sequest HT (A2)	A	2	Unambiguous	QGVDADINGLR	QGVDADInGLR	N8(Deamidated)	1	1	P35527	P35527	Keratin, type I cytoskeletal 9 OS=Homo sapiens OX=9606 GN=KRT9 PE=1 SV=3	0	2	2	0.4552	0	1	1	1	579.791	1158.57	1158.57	-0.37	-0.00022	0	0	738530	HCD	MS2	14.6082	50	76.7047	23959	23959	23958	0/0		2.9	1263	0.0007241	0.004632	0.496
1904247_Proteos_005.RAW	AF-M	Artificial Fingerprint	High	Sequest HT	Sequest HT (A2)	A	2	Unambiguous	FSSCGGGGGSFGAGGGFGSR	FSScGGGGGSFGAGGGFGSR	C4(Carbamidomethyl)	1	1	P04264	P04264	Keratin, type II cytoskeletal 1 OS=Homo sapiens OX=9606 GN=KRT1 PE=1 SV=6	0	2	2	0.5217	0	1	1	1	883.371	1765.73	1765.73	-0.44	-0.00039	0	0	1.10119e+06	HCD	MS2	0	50	76.8349	24001	24001	24000	0/0		4.14	3100	0	6.091e-05	1.147
1904247_Proteos_005.RAW	AF-M	Artificial Fingerprint	High	Sequest HT	Sequest HT (A2)	A	2	Selected	IKFEMEQNLR	IKFEMEqNLR	Q7(Deamidated)	1	1	P35527	P35527	Keratin, type I cytoskeletal 9 OS=Homo sapiens OX=9606 GN=KRT9 PE=1 SV=3	1	3	3		0.0417	3	3	3	436.892	1308.66	1308.66	-0.58	-0.00025	0	0	427503	HCD	MS2	11.0565	50	76.843	24004	24004	24003	0/0		1.61	1396	0.002625	0.05678	0.118
1904247_Proteos_005.RAW	AF-M	Artificial Fingerprint	High	Sequest HT	Sequest HT (A2)	A	2	Unambiguous	FSSCGGGGGSFGAGGGFGSR	FSScGGGGGSFGAGGGFGSR	C4(Carbamidomethyl)	1	1	P04264	P04264	Keratin, type II cytoskeletal 1 OS=Homo sapiens OX=9606 GN=KRT1 PE=1 SV=6	0	3	3	0.1443	0	1	1	1	589.25	1765.73	1765.73	0.11	6e-05	0	0	203540	HCD	MS2	16.4947	50	76.911	24023	24023	24022	0/0		1.94	3200	0.001797	0.04194	0.164
1904247_Proteos_005.RAW	AF-M	Artificial Fingerprint	High	Sequest HT	Sequest HT (A2)	A	2	Unambiguous	GGSGGSHGGGSGFGGESGGSYGGGEEASGSGGGYGGGSGK	GGSGGSHGGGSGFGGESGGSYGGGEEASGSGGGYGGGSGK		1	1	P35527	P35527	Keratin, type I cytoskeletal 9 OS=Homo sapiens OX=9606 GN=KRT9 PE=1 SV=3	0	3	3	0.2593	0	1	1	1	1075.1	3223.28	3223.28	0.04	5e-05	0	0	136830	HCD	MS2	0	50	76.9265	24028	24028	24026	0/0		2.16	3886	0.0007241	0.01622	0.308
1904247_Proteos_005.RAW	AF-M	Artificial Fingerprint	High	Sequest HT	Sequest HT (A2)	A	2	Unambiguous	TLLDIDNTR	TLLDIDNTR		1	1	P35527	P35527	Keratin, type I cytoskeletal 9 OS=Homo sapiens OX=9606 GN=KRT9 PE=1 SV=3	0	2	2	0.4641	0	1	1	1	530.786	1060.56	1060.56	1.23	0.00065	0	0	28527348	HCD	MS2	0.0764447	2.616	76.9561	24037	24037	24036	0/0		2.09	1099	0.0007241	0.01009	0.379
1904247_Proteos_005.RAW	AF-M	Artificial Fingerprint	High	Sequest HT	Sequest HT (A2)	A	2	Rejected	YQELQITAGR	YqELQITAGR	Q2(Deamidated)	0	1		Q7Z794	Keratin, type II cytoskeletal 1b OS=Homo sapiens OX=9606 GN=KRT77 PE=2 SV=3	0	2	2	0	0	1	1	1	590.305	1179.6	1179.6	1.52	0.0009	0	0	310672	HCD	MS2	44.8153	50	76.9732	24043	24043	24040	0/0		2.12	1185	0.0007241	0.004648	0.496
1904247_Proteos_005.RAW	AF-M	Artificial Fingerprint	High	Sequest HT	Sequest HT (A2)	A	2	Selected	YEELQITAGR	YEELQITAGR		2	2	P04264; P04259	P04264; P04259	Keratin, type II cytoskeletal 1 OS=Homo sapiens OX=9606 GN=KRT1 PE=1 SV=6; Keratin, type II cytoskeletal 6B OS=Homo sapiens OX=9606 GN=KRT6B PE=1 SV=5	0	2	2		0	2	2	2	590.305	1179.6	1179.6	1.52	0.0009	0	0	310672	HCD	MS2	44.8153	50	76.9732	24043	24043	24040	0/0		2.12	1185	0.0007241	0.004648	0.496
1904247_Proteos_005.RAW	AF-M	Artificial Fingerprint	High	Sequest HT	Sequest HT (A2)	A	2	Unambiguous	MSGECAPNVSVSVSTSHTTISGGGSR	MSGEcAPNVSVSVSTSHTTISGGGSR	C5(Carbamidomethyl)	1	1	P04264	P04264	Keratin, type II cytoskeletal 1 OS=Homo sapiens OX=9606 GN=KRT1 PE=1 SV=6	0	3	3	0.5613	0	1	1	1	855.727	2565.17	2565.17	-0.5	-0.00043	0	0	369892	HCD	MS2	3.38344	50	76.9934	24049	24049	24048	0/0		5.06	9083	0	0.0003183	0.899
1904247_Proteos_005.RAW	AF-M	Artificial Fingerprint	High	Sequest HT	Sequest HT (A2)	A	2	Unambiguous	FLEQQNQVLQTK	FLEQQNQVLQTK		2	3	P35908; P04264	Q7Z794; P35908; P04264	Keratin, type II cytoskeletal 1b OS=Homo sapiens OX=9606 GN=KRT77 PE=2 SV=3; Keratin, type II cytoskeletal 2 epidermal OS=Homo sapiens OX=9606 GN=KRT2 PE=1 SV=2; Keratin, type II cytoskeletal 1 OS=Homo sapiens OX=9606 GN=KRT1 PE=1 SV=6	0	2	2	0.2842	0	1	1	1	738.396	1475.79	1475.79	0.04	3e-05	0	0	176404	HCD	MS2	11.0971	50	77.0338	24060	24060	24059	0/0		1.83	1296	0.0007241	0.01753	0.296
1904247_Proteos_005.RAW	AF-M	Artificial Fingerprint	High	Sequest HT	Sequest HT (A2)	A	2	Unambiguous	QSVEADINGLR	QSVEADInGLR	N8(Deamidated)	1	3	P13645	Q2M2I5; P13645; P13646	Keratin, type I cytoskeletal 24 OS=Homo sapiens OX=9606 GN=KRT24 PE=1 SV=1; Keratin, type I cytoskeletal 10 OS=Homo sapiens OX=9606 GN=KRT10 PE=1 SV=6; Keratin, type I cytoskeletal 13 OS=Homo sapiens OX=9606 GN=KRT13 PE=1 SV=4	0	2	2	0.4402	0	1	1	1	601.804	1202.6	1202.6	-0.23	-0.00014	0	0	329204	HCD	MS2	7.9649	50	77.084	24071	24071	24070	0/0		2.59	1327	0	0.002816	0.571
1904247_Proteos_005.RAW	AF-M	Artificial Fingerprint	High	Sequest HT	Sequest HT (A2)	A	2	Unambiguous	NMQDMVEDYR	NmQDMVEDYR	M2(Oxidation)	1	1	P04264	P04264	Keratin, type II cytoskeletal 1 OS=Homo sapiens OX=9606 GN=KRT1 PE=1 SV=6	0	2	2	0.25	0	1	1	1	658.766	1316.52	1316.52	-0.08	-5e-05	0	0	464120	HCD	MS2	0	50	77.1591	24091	24091	24090	0/0		2	1143	0	0.002801	0.572
1904247_Proteos_005.RAW	AF-M	Artificial Fingerprint	High	Sequest HT	Sequest HT (A2)	A	2	Unambiguous	QVLDNLTMEK	QVLDNLTMEK		1	1	P35527	P35527	Keratin, type I cytoskeletal 9 OS=Homo sapiens OX=9606 GN=KRT9 PE=1 SV=3	0	2	2	0.5393	0	1	1	1	595.808	1190.61	1190.61	0.32	0.00019	0	0	6774525	HCD	MS2	0.220624	12.593	77.1731	24095	24095	24094	0/0		2.8	1201	0.0007241	0.007134	0.432
1904247_Proteos_005.RAW	AF-M	Artificial Fingerprint	High	Sequest HT	Sequest HT (A2)	A	2	Unambiguous	MTLDDFR	mTLDDFR	M1(Oxidation)	1	1	P35527	P35527	Keratin, type I cytoskeletal 9 OS=Homo sapiens OX=9606 GN=KRT9 PE=1 SV=3	0	2	2	0.3056	0	1	1	1	457.208	913.408	913.408	-0.36	-0.00016	0	0	181478	HCD	MS2	7.36662	50	77.2148	24106	24106	24105	0/0		1.08	957	0.001797	0.04691	0.147
1904247_Proteos_005.RAW	AF-M	Artificial Fingerprint	High	Sequest HT	Sequest HT (A2)	A	2	Unambiguous	TAAENDFVTLK	TAAEnDFVTLK	N5(Deamidated)	1	1	P35908	P35908	Keratin, type II cytoskeletal 2 epidermal OS=Homo sapiens OX=9606 GN=KRT2 PE=1 SV=2	0	2	2	0.3418	0	1	1	1	605.303	1209.6	1209.6	-0.59	-0.00036	0	0	161575	HCD	MS2	0	50	77.3709	24148	24148	24147	0/0		1.58	1504	0.00793	0.09835	0.033
1904247_Proteos_005.RAW	AF-M	Artificial Fingerprint	High	Sequest HT	Sequest HT (A2)	A	2	Unambiguous	NTGIICTIGPASR	NTGIIcTIGPASR	C6(Carbamidomethyl)	1	1	P14618	P14618	Pyruvate kinase PKM OS=Homo sapiens OX=9606 GN=PKM PE=1 SV=4	0	2	2	0.483	0	1	1	1	680.356	1359.71	1359.7	0.52	0.00035	0	0	110860	HCD	MS2	65.6879	50	77.4622	24172	24172	24171	0/0		1.76	1441	0.002625	0.06763	0.091
1904247_Proteos_005.RAW	AF-M	Artificial Fingerprint	High	Sequest HT	Sequest HT (A2)	A	2	Unambiguous	MTLDDFR	MTLDDFR		1	1	P35527	P35527	Keratin, type I cytoskeletal 9 OS=Homo sapiens OX=9606 GN=KRT9 PE=1 SV=3	0	2	2	0.3514	0	1	1	1	449.211	897.414	897.413	0.5	0.00022	0	0	120080	HCD	MS2	41.4952	50	77.5694	24203	24203	24201	0/0		1.48	970	0.0007241	0.01288	0.343
1904247_Proteos_005.RAW	AF-M	Artificial Fingerprint	High	Sequest HT	Sequest HT (A2)	A	2	Unambiguous	QGVDADINGLR	QGVDADInGLR	N8(Deamidated)	1	1	P35527	P35527	Keratin, type I cytoskeletal 9 OS=Homo sapiens OX=9606 GN=KRT9 PE=1 SV=3	0	2	2	0.4754	0	1	1	1	579.791	1158.57	1158.57	-0.16	-9e-05	0	0	542636	HCD	MS2	7.72584	50	77.7122	24243	24243	24242	0/0		2.84	1263	0.0007241	0.003676	0.531
1904247_Proteos_005.RAW	AF-M	Artificial Fingerprint	High	Sequest HT	Sequest HT (A2)	A	2	Unambiguous	TNAENEFVTIK	TNAEnEFVTIK	N5(Deamidated)	1	1	P04264	P04264	Keratin, type II cytoskeletal 1 OS=Homo sapiens OX=9606 GN=KRT1 PE=1 SV=6	0	2	2	0.0784	0	1	1	1	633.814	1266.62	1266.62	-0.26	-0.00016	0	0	4223422	HCD	MS2	1.2242	26.158	77.7227	24248	24248	24247	0/0		3.19	1537	0.0007241	0.01365	0.334
1904247_Proteos_005.RAW	AF-M	Artificial Fingerprint	High	Sequest HT	Sequest HT (A2)	A	2	Unambiguous	FSSCGGGGGSFGAGGGFGSR	FSScGGGGGSFGAGGGFGSR	C4(Carbamidomethyl)	1	1	P04264	P04264	Keratin, type II cytoskeletal 1 OS=Homo sapiens OX=9606 GN=KRT1 PE=1 SV=6	0	2	2	0.5493	0	1	1	1	883.37	1765.73	1765.73	-1.61	-0.00142	0	0	877247	HCD	MS2	0	50	77.8393	24283	24283	24282	0/0		4.46	3106	0	1.754e-05	1.334
1904247_Proteos_005.RAW	AF-M	Artificial Fingerprint	High	Sequest HT	Sequest HT (A2)	A	2	Selected	IKFEMEQNLR	IKFEMEQnLR	N8(Deamidated)	1	1	P35527	P35527	Keratin, type I cytoskeletal 9 OS=Homo sapiens OX=9606 GN=KRT9 PE=1 SV=3	1	3	3	0.1589	0	1	1	1	436.892	1308.66	1308.66	-1	-0.00044	0	0	440720	HCD	MS2	7.75739	50	77.8473	24286	24286	24285	0/0		1.51	1384	0.003126	0.06999	0.086
1904247_Proteos_005.RAW	AF-M	Artificial Fingerprint	High	Sequest HT	Sequest HT (A2)	A	2	Unambiguous	GGSGGSHGGGSGFGGESGGSYGGGEEASGSGGGYGGGSGK	GGSGGSHGGGSGFGGESGGSYGGGEEASGSGGGYGGGSGK		1	1	P35527	P35527	Keratin, type I cytoskeletal 9 OS=Homo sapiens OX=9606 GN=KRT9 PE=1 SV=3	0	3	3	0.5493	0	1	1	1	1075.1	3223.28	3223.28	0.27	0.00029	0	0	116901	HCD	MS2	0	50	77.9385	24319	24319	24317	0/0		3.04	3973	0	0.002653	0.58
1904247_Proteos_005.RAW	AF-M	Artificial Fingerprint	High	Sequest HT	Sequest HT (A2)	A	2	Unambiguous	TLLDIDNTR	TLLDIDNTR		1	1	P35527	P35527	Keratin, type I cytoskeletal 9 OS=Homo sapiens OX=9606 GN=KRT9 PE=1 SV=3	0	2	2	0.4591	0	1	1	1	530.785	1060.56	1060.56	-0.72	-0.00038	0	0	5549867	HCD	MS2	0.708689	15.556	77.9662	24330	24330	24329	0/0		2.2	1200	0.002625	0.06151	0.106
1904247_Proteos_005.RAW	AF-M	Artificial Fingerprint	High	Sequest HT	Sequest HT (A2)	A	2	Selected	YEELQITAGR	YEELQITAGR		2	2	P04264; P04259	P04264; P04259	Keratin, type II cytoskeletal 1 OS=Homo sapiens OX=9606 GN=KRT1 PE=1 SV=6; Keratin, type II cytoskeletal 6B OS=Homo sapiens OX=9606 GN=KRT6B PE=1 SV=5	0	2	2	0	0	1	1	1	590.303	1179.6	1179.6	-1.17	-0.00069	0	0	269586	HCD	MS2	10.2303	50	77.9812	24335	24335	24334	0/0		2.1	1133	0.0007241	0.01045	0.374
1904247_Proteos_005.RAW	AF-M	Artificial Fingerprint	High	Sequest HT	Sequest HT (A2)	A	2	Rejected	YQELQITAGR	YqELQITAGR	Q2(Deamidated)	0	1		Q7Z794	Keratin, type II cytoskeletal 1b OS=Homo sapiens OX=9606 GN=KRT77 PE=2 SV=3	0	2	2		0	2	2	2	590.303	1179.6	1179.6	-1.17	-0.00069	0	0	269586	HCD	MS2	10.2303	50	77.9812	24335	24335	24334	0/0		2.1	1133	0.0007241	0.01045	0.374
1904247_Proteos_005.RAW	AF-M	Artificial Fingerprint	High	Sequest HT	Sequest HT (A2)	A	2	Unambiguous	MSGECAPNVSVSVSTSHTTISGGGSR	MSGEcAPNVSVSVSTSHTTISGGGSR	C5(Carbamidomethyl)	1	1	P04264	P04264	Keratin, type II cytoskeletal 1 OS=Homo sapiens OX=9606 GN=KRT1 PE=1 SV=6	0	3	3	0.5203	0	1	1	1	855.727	2565.17	2565.17	-0.29	-0.00025	0	0	127242	HCD	MS2	5.35569	50	78.0023	24345	24345	24344	0/0		3.44	9113	0.0007241	0.004268	0.509
1904247_Proteos_005.RAW	AF-M	Artificial Fingerprint	High	Sequest HT	Sequest HT (A2)	A	2	Unambiguous	FLEQQNQVLQTK	FLEQQnQVLQTK	N6(Deamidated)	2	3	P35908; P04264	Q7Z794; P35908; P04264	Keratin, type II cytoskeletal 1b OS=Homo sapiens OX=9606 GN=KRT77 PE=2 SV=3; Keratin, type II cytoskeletal 2 epidermal OS=Homo sapiens OX=9606 GN=KRT2 PE=1 SV=2; Keratin, type II cytoskeletal 1 OS=Homo sapiens OX=9606 GN=KRT1 PE=1 SV=6	0	2	2	0.0272	0	1	1	1	738.888	1476.77	1476.77	0.28	0.00021	0	0	444355	HCD	MS2	21.2252	50	78.0391	24359	24359	24358	0/0		2.57	1582	0.0007241	0.01718	0.299
1904247_Proteos_005.RAW	AF-M	Artificial Fingerprint	High	Sequest HT	Sequest HT (A2)	A	2	Unambiguous	FLEQQNQVLQTK	FLEQQNqVLQTK	Q7(Deamidated)	2	3	P35908; P04264	Q7Z794; P35908; P04264	Keratin, type II cytoskeletal 1b OS=Homo sapiens OX=9606 GN=KRT77 PE=2 SV=3; Keratin, type II cytoskeletal 2 epidermal OS=Homo sapiens OX=9606 GN=KRT2 PE=1 SV=2; Keratin, type II cytoskeletal 1 OS=Homo sapiens OX=9606 GN=KRT1 PE=1 SV=6	0	2	2		0.0272	2	2	2	738.888	1476.77	1476.77	0.28	0.00021	0	0	444355	HCD	MS2	21.2252	50	78.0391	24359	24359	24358	0/0		2.5	1582	0.0007241	0.01862	0.287
1904247_Proteos_005.RAW	AF-M	Artificial Fingerprint	High	Sequest HT	Sequest HT (A2)	A	2	Unambiguous	FLEQQNQVLQTK	FLEQqNQVLQTK	Q5(Deamidated)	2	3	P35908; P04264	Q7Z794; P35908; P04264	Keratin, type II cytoskeletal 1b OS=Homo sapiens OX=9606 GN=KRT77 PE=2 SV=3; Keratin, type II cytoskeletal 2 epidermal OS=Homo sapiens OX=9606 GN=KRT2 PE=1 SV=2; Keratin, type II cytoskeletal 1 OS=Homo sapiens OX=9606 GN=KRT1 PE=1 SV=6	0	2	2		0.035	3	3	3	738.888	1476.77	1476.77	0.28	0.00021	0	0	444355	HCD	MS2	21.2252	50	78.0391	24359	24359	24358	0/0		2.48	1582	0.0007241	0.01987	0.277
1904247_Proteos_005.RAW	AF-M	Artificial Fingerprint	High	Sequest HT	Sequest HT (A2)	A	2	Unambiguous	IKFEMEQNLR	IKFEMEQnLR	N8(Deamidated)	1	1	P35527	P35527	Keratin, type I cytoskeletal 9 OS=Homo sapiens OX=9606 GN=KRT9 PE=1 SV=3	1	2	2	0.0379	0	1	1	1	654.834	1308.66	1308.66	-1.1	-0.00072	0	0	244125	HCD	MS2	0	50	78.0565	24365	24365	24364	0/0		2.11	1384	0	0.003145	0.555
1904247_Proteos_005.RAW	AF-M	Artificial Fingerprint	High	Sequest HT	Sequest HT (A2)	A	2	Unambiguous	IKFEMEQNLR	IKFEMEqNLR	Q7(Deamidated)	1	1	P35527	P35527	Keratin, type I cytoskeletal 9 OS=Homo sapiens OX=9606 GN=KRT9 PE=1 SV=3	1	2	2		0.0379	2	2	2	654.834	1308.66	1308.66	-1.1	-0.00072	0	0	244125	HCD	MS2	0	50	78.0565	24365	24365	24364	0/0		2.03	1384	0.001797	0.03532	0.19
1904247_Proteos_005.RAW	AF-M	Artificial Fingerprint	High	Sequest HT	Sequest HT (A2)	A	2	Unambiguous	QSVEADINGLR	QSVEADInGLR	N8(Deamidated)	1	3	P13645	Q2M2I5; P13645; P13646	Keratin, type I cytoskeletal 24 OS=Homo sapiens OX=9606 GN=KRT24 PE=1 SV=1; Keratin, type I cytoskeletal 10 OS=Homo sapiens OX=9606 GN=KRT10 PE=1 SV=6; Keratin, type I cytoskeletal 13 OS=Homo sapiens OX=9606 GN=KRT13 PE=1 SV=4	0	2	2	0.3883	0	1	1	1	601.803	1202.6	1202.6	-1.25	-0.00075	0	0	108119	HCD	MS2	20.6079	50	78.0896	24375	24375	24374	0/0		1.88	1401	0.0007241	0.00935	0.391
1904247_Proteos_005.RAW	AF-M	Artificial Fingerprint	High	Sequest HT	Sequest HT (A2)	A	2	Selected	NKLNDLEDALQQAK	NKLNDLEDALQQAK		1	1	P04264	P04264	Keratin, type II cytoskeletal 1 OS=Homo sapiens OX=9606 GN=KRT1 PE=1 SV=6	1	3	3	0.0114	0	1	1	1	533.949	1599.83	1599.83	-0.36	-0.00019	0	0	131284	HCD	MS2	28.0302	50	78.1342	24389	24389	24388	0/0		1.76	1630	0.009708	0.1205	0
1904247_Proteos_005.RAW	AF-M	Artificial Fingerprint	High	Sequest HT	Sequest HT (A2)	A	2	Unambiguous	NMQDMVEDYR	NmQDMVEDYR	M2(Oxidation)	1	1	P04264	P04264	Keratin, type II cytoskeletal 1 OS=Homo sapiens OX=9606 GN=KRT1 PE=1 SV=6	0	2	2	0.2294	0	1	1	1	658.765	1316.52	1316.52	-1.65	-0.00109	0	0	255610	HCD	MS2	27.377	50	78.166	24398	24398	24397	0/0		1.7	1090	0.0007241	0.00836	0.408
1904247_Proteos_005.RAW	AF-M	Artificial Fingerprint	High	Sequest HT	Sequest HT (A2)	A	2	Unambiguous	QVLDNLTMEK	QVLDNLTMEK		1	1	P35527	P35527	Keratin, type I cytoskeletal 9 OS=Homo sapiens OX=9606 GN=KRT9 PE=1 SV=3	0	2	2	0.5802	0	1	1	1	595.808	1190.61	1190.61	-0.7	-0.00042	0	0	640326	HCD	MS2	6.09377	50	78.1821	24403	24403	24402	0/0		2.43	1202	0.0007241	0.00842	0.407
1904247_Proteos_005.RAW	AF-M	Artificial Fingerprint	High	Sequest HT	Sequest HT (A2)	A	2	Unambiguous	MTLDDFR	mTLDDFR	M1(Oxidation)	1	1	P35527	P35527	Keratin, type I cytoskeletal 9 OS=Homo sapiens OX=9606 GN=KRT9 PE=1 SV=3	0	2	2	0.4974	0	1	1	1	457.207	913.407	913.408	-1.69	-0.00077	0	0	902332	HCD	MS2	4.70482	50	78.2221	24414	24414	24413	0/0		1.93	986	0.0007241	0.01888	0.285
1904247_Proteos_005.RAW	AF-M	Artificial Fingerprint	High	Sequest HT	Sequest HT (A2)	A	2	Unambiguous	KNHKEEMSQLTGQNSGDVNVEINVAPGK	KNHKEEMSQLTGQNSGDVNVEINVAPGK		1	1	P35527	P35527	Keratin, type I cytoskeletal 9 OS=Homo sapiens OX=9606 GN=KRT9 PE=1 SV=3	2	4	4	0.4608	0	1	1	1	756.626	3023.48	3023.49	-0.75	-0.00057	0	0	366650	HCD	MS2	0.990113	50	78.311	24437	24437	24436	0/0		4.97	7733	0	0.001142	0.707
1904247_Proteos_005.RAW	AF-M	Artificial Fingerprint	High	Sequest HT	Sequest HT (A2)	A	2	Unambiguous	LNDSILQATEQR	LNDSILQATEQR		1	1	P15924	P15924	Desmoplakin OS=Homo sapiens OX=9606 GN=DSP PE=1 SV=3	0	2	2	0.5194	0	1	1	1	694.362	1387.72	1387.72	-0.44	-0.00031	0	0	114361	HCD	MS2	33.8021	50	78.339	24444	24444	24443	0/0		2.58	1569	0	0.00153	0.663
1904247_Proteos_005.RAW	AF-M	Artificial Fingerprint	High	Sequest HT	Sequest HT (A2)	A	2	Unambiguous	NHKEEMSQLTGQNSGDVNVEINVAPGK	nHKEEmSQLTGQNSGDVNVEINVAPGK	N1(Deamidated); M6(Oxidation)	1	1	P35527	P35527	Keratin, type I cytoskeletal 9 OS=Homo sapiens OX=9606 GN=KRT9 PE=1 SV=3	1	4	4	0.0349	0	1	1	1	728.848	2912.37	2912.37	0.5	0.00036	0	0	97540.7	HCD	MS2	11.9222	50	78.4239	24461	24461	24460	0/0		1.72	10317	0.007067	0.09005	0.047
1904247_Proteos_005.RAW	AF-M	Artificial Fingerprint	High	Sequest HT	Sequest HT (A2)	A	2	Unambiguous	NHKEEMSQLTGQNSGDVNVEINVAPGK	NHKEEmSQLTGQnSGDVNVEINVAPGK	M6(Oxidation); N13(Deamidated)	1	1	P35527	P35527	Keratin, type I cytoskeletal 9 OS=Homo sapiens OX=9606 GN=KRT9 PE=1 SV=3	1	4	4		0.0349	2	2	2	728.848	2912.37	2912.37	0.5	0.00036	0	0	97540.7	HCD	MS2	11.9222	50	78.4239	24461	24461	24460	0/0		1.66	10317	0.002625	0.05433	0.125
1904247_Proteos_005.RAW	AF-M	Artificial Fingerprint	High	Sequest HT	Sequest HT (A2)	A	2	Unambiguous	NHKEEMSQLTGQNSGDVNVEINVAPGK	NHKEEmSQLTGqNSGDVNVEINVAPGK	M6(Oxidation); Q12(Deamidated)	1	1	P35527	P35527	Keratin, type I cytoskeletal 9 OS=Homo sapiens OX=9606 GN=KRT9 PE=1 SV=3	1	4	4		0.0407	3	3	3	728.848	2912.37	2912.37	0.5	0.00036	0	0	97540.7	HCD	MS2	11.9222	50	78.4239	24461	24461	24460	0/0		1.65	10317	0.002625	0.05868	0.113
1904247_Proteos_005.RAW	AF-M	Artificial Fingerprint	High	Sequest HT	Sequest HT (A2)	A	2	Unambiguous	NHKEEMSQLTGQNSGDVNVEINVAPGK	NHKEEmSqLTGQNSGDVNVEINVAPGK	M6(Oxidation); Q8(Deamidated)	1	1	P35527	P35527	Keratin, type I cytoskeletal 9 OS=Homo sapiens OX=9606 GN=KRT9 PE=1 SV=3	1	4	4		0.0407	3	4	4	728.848	2912.37	2912.37	0.5	0.00036	0	0	97540.7	HCD	MS2	11.9222	50	78.4239	24461	24461	24460	0/0		1.65	10317	0.002625	0.05715	0.117
1904247_Proteos_005.RAW	AF-M	Artificial Fingerprint	High	Sequest HT	Sequest HT (A2)	A	2	Unambiguous	MTLDDFR	MTLDDFR		1	1	P35527	P35527	Keratin, type I cytoskeletal 9 OS=Homo sapiens OX=9606 GN=KRT9 PE=1 SV=3	0	2	2	0.5185	0	1	1	1	449.21	897.413	897.413	-0.66	-0.00029	0	0	25309464	HCD	MS2	1.89034	2.849	78.5771	24496	24496	24495	0/0		1.89	835	0.002625	0.06432	0.099
1904247_Proteos_005.RAW	AF-M	Artificial Fingerprint	High	Sequest HT	Sequest HT (A2)	A	2	Unambiguous	QGVDADINGLR	QGVDADInGLR	N8(Deamidated)	1	1	P35527	P35527	Keratin, type I cytoskeletal 9 OS=Homo sapiens OX=9606 GN=KRT9 PE=1 SV=3	0	2	2	0.4413	0	1	1	1	579.791	1158.57	1158.57	-0.69	-0.0004	0	0	443497	HCD	MS2	2.90887	50	78.7169	24534	24534	24533	0/0		2.81	1234	0.0007241	0.003866	0.524
1904247_Proteos_005.RAW	AF-M	Artificial Fingerprint	High	Sequest HT	Sequest HT (A2)	A	2	Unambiguous	KNHKEEMSQLTGQNSGDVNVEINVAPGK	KNHKEEMSQLTGQNSGDVNVEINVAPGK		1	1	P35527	P35527	Keratin, type I cytoskeletal 9 OS=Homo sapiens OX=9606 GN=KRT9 PE=1 SV=3	2	5	5	0.2566	0	1	1	1	605.502	3023.48	3023.49	-0.96	-0.00058	0	0	315647	HCD	MS2	6.9407	50	78.82	24562	24562	24561	0/0		4.17	7745	0	0.0005313	0.822
1904247_Proteos_005.RAW	AF-M	Artificial Fingerprint	High	Sequest HT	Sequest HT (A2)	A	2	Unambiguous	FSSCGGGGGSFGAGGGFGSR	FSScGGGGGSFGAGGGFGSR	C4(Carbamidomethyl)	1	1	P04264	P04264	Keratin, type II cytoskeletal 1 OS=Homo sapiens OX=9606 GN=KRT1 PE=1 SV=6	0	2	2	0.5533	0	1	1	1	883.37	1765.73	1765.73	-1.13	-0.001	0	0	640134	HCD	MS2	2.70291	50	78.8405	24567	24567	24566	0/0		4.5	3080	0	1.79e-05	1.331
1904247_Proteos_005.RAW	AF-M	Artificial Fingerprint	High	Sequest HT	Sequest HT (A2)	A	2	Unambiguous	IKFEMEQNLR	IKFEMEQnLR	N8(Deamidated)	1	1	P35527	P35527	Keratin, type I cytoskeletal 9 OS=Homo sapiens OX=9606 GN=KRT9 PE=1 SV=3	1	3	3	0.0884	0	1	1	1	436.892	1308.66	1308.66	-0.58	-0.00025	0	0	848903	HCD	MS2	3.82869	50	78.8545	24571	24571	24570	0/0		2.15	1396	0.0007241	0.01672	0.303
1904247_Proteos_005.RAW	AF-M	Artificial Fingerprint	High	Sequest HT	Sequest HT (A2)	A	2	Unambiguous	GGSGGSHGGGSGFGGESGGSYGGGEEASGSGGGYGGGSGK	GGSGGSHGGGSGFGGESGGSYGGGEEASGSGGGYGGGSGK		1	1	P35527	P35527	Keratin, type I cytoskeletal 9 OS=Homo sapiens OX=9606 GN=KRT9 PE=1 SV=3	0	3	3	0.4163	0	1	1	1	1075.1	3223.28	3223.28	-0.3	-0.00032	0	0	105447	HCD	MS2	0	50	78.9462	24596	24596	24595	0/0		2.09	3891	0.0007241	0.01688	0.302
1904247_Proteos_005.RAW	AF-M	Artificial Fingerprint	High	Sequest HT	Sequest HT (A2)	A	2	Unambiguous	TLLDIDNTR	TLLDIDNTR		1	1	P35527	P35527	Keratin, type I cytoskeletal 9 OS=Homo sapiens OX=9606 GN=KRT9 PE=1 SV=3	0	2	2	0.4118	0	1	1	1	530.785	1060.56	1060.56	-0.03	-2e-05	0	0	2.07531e+06	HCD	MS2	0.261125	34.167	78.9712	24601	24601	24600	0/0		2.04	1200	0.001797	0.04217	0.164
1904247_Proteos_005.RAW	AF-M	Artificial Fingerprint	High	Sequest HT	Sequest HT (A2)	A	2	Selected	YEELQITAGR	YEELQITAGR		2	2	P04264; P04259	P04264; P04259	Keratin, type II cytoskeletal 1 OS=Homo sapiens OX=9606 GN=KRT1 PE=1 SV=6; Keratin, type II cytoskeletal 6B OS=Homo sapiens OX=9606 GN=KRT6B PE=1 SV=5	0	2	2	0	0	1	1	1	590.304	1179.6	1179.6	-0.14	-8e-05	0	0	197130	HCD	MS2	36.0812	50	78.9901	24605	24605	24604	0/0		2.08	1165	0.0007241	0.01204	0.353
1904247_Proteos_005.RAW	AF-M	Artificial Fingerprint	High	Sequest HT	Sequest HT (A2)	A	2	Rejected	YQELQITAGR	YqELQITAGR	Q2(Deamidated)	0	1		Q7Z794	Keratin, type II cytoskeletal 1b OS=Homo sapiens OX=9606 GN=KRT77 PE=2 SV=3	0	2	2		0	2	2	2	590.304	1179.6	1179.6	-0.14	-8e-05	0	0	197130	HCD	MS2	36.0812	50	78.9901	24605	24605	24604	0/0		2.08	1165	0.0007241	0.01204	0.353
1904247_Proteos_005.RAW	AF-M	Artificial Fingerprint	High	Sequest HT	Sequest HT (A2)	A	2	Unambiguous	MSGECAPNVSVSVSTSHTTISGGGSR	MSGEcAPNVSVSVSTSHTTISGGGSR	C5(Carbamidomethyl)	1	1	P04264	P04264	Keratin, type II cytoskeletal 1 OS=Homo sapiens OX=9606 GN=KRT1 PE=1 SV=6	0	3	3	0.5241	0	1	1	1	855.726	2565.16	2565.17	-1.72	-0.00147	0	0	103668	HCD	MS2	0	50	79.0055	24610	24610	24609	0/0		4.35	9093	0	0.003187	0.553
1904247_Proteos_005.RAW	AF-M	Artificial Fingerprint	High	Sequest HT	Sequest HT (A2)	A	2	Unambiguous	FLEQQNQVLQTK	FLEQQNQVLQTK		2	3	P35908; P04264	Q7Z794; P35908; P04264	Keratin, type II cytoskeletal 1b OS=Homo sapiens OX=9606 GN=KRT77 PE=2 SV=3; Keratin, type II cytoskeletal 2 epidermal OS=Homo sapiens OX=9606 GN=KRT2 PE=1 SV=2; Keratin, type II cytoskeletal 1 OS=Homo sapiens OX=9606 GN=KRT1 PE=1 SV=6	0	2	2	0.1609	0	1	1	1	738.395	1475.78	1475.79	-1.12	-0.00083	0	0	159684	HCD	MS2	8.33135	50	79.0457	24621	24621	24619	0/0		1.74	1271	0.00793	0.09666	0.035
1904247_Proteos_005.RAW	AF-M	Artificial Fingerprint	High	Sequest HT	Sequest HT (A2)	A	2	Unambiguous	QSVEADINGLR	QSVEADInGLR	N8(Deamidated)	1	3	P13645	Q2M2I5; P13645; P13646	Keratin, type I cytoskeletal 24 OS=Homo sapiens OX=9606 GN=KRT24 PE=1 SV=1; Keratin, type I cytoskeletal 10 OS=Homo sapiens OX=9606 GN=KRT10 PE=1 SV=6; Keratin, type I cytoskeletal 13 OS=Homo sapiens OX=9606 GN=KRT13 PE=1 SV=4	0	2	2	0.2042	0	1	1	1	601.804	1202.6	1202.6	-0.54	-0.00032	0	0	44206.4	HCD	MS2	46.8843	50	79.0984	24637	24637	24635	0/0		1.42	1330	0.008659	0.1041	0.024
1904247_Proteos_005.RAW	AF-M	Artificial Fingerprint	High	Sequest HT	Sequest HT (A2)	A	2	Unambiguous	MSVEADINGLR	mSVEADInGLR	M1(Oxidation); N8(Deamidated)	1	2	P02533	P02533; P08727	Keratin, type I cytoskeletal 14 OS=Homo sapiens OX=9606 GN=KRT14 PE=1 SV=4; Keratin, type I cytoskeletal 19 OS=Homo sapiens OX=9606 GN=KRT19 PE=1 SV=4	0	2	2	0.5311	0	1	1	1	611.292	1221.58	1221.58	-1.14	-0.0007	0	0	81365.3	HCD	MS2	6.33375	50	79.1174	24641	24641	24640	0/0		1.77	1521	0.0007241	0.01709	0.3
1904247_Proteos_005.RAW	AF-M	Artificial Fingerprint	High	Sequest HT	Sequest HT (A2)	A	2	Selected	NMQDMVEDYR	NmQDMVEDYR	M2(Oxidation)	1	1	P04264	P04264	Keratin, type II cytoskeletal 1 OS=Homo sapiens OX=9606 GN=KRT1 PE=1 SV=6	0	2	2	0.0377	0	1	1	1	658.766	1316.52	1316.52	-0.26	-0.00017	0	0	132215	HCD	MS2	15.3605	50	79.1755	24661	24661	24660	0/0		1.59	1124	0.0007241	0.02384	0.25
1904247_Proteos_005.RAW	AF-M	Artificial Fingerprint	High	Sequest HT	Sequest HT (A2)	A	2	Unambiguous	QVLDNLTMEK	QVLDNLTMEK		1	1	P35527	P35527	Keratin, type I cytoskeletal 9 OS=Homo sapiens OX=9606 GN=KRT9 PE=1 SV=3	0	2	2	0.4248	0	1	1	1	595.808	1190.61	1190.61	0.12	7e-05	0	0	161366	HCD	MS2	10.591	50	79.1886	24664	24664	24663	0/0		1.53	1201	0.002625	0.06084	0.107
1904247_Proteos_005.RAW	AF-M	Artificial Fingerprint	High	Sequest HT	Sequest HT (A2)	A	2	Unambiguous	LPVDIAYK	LPVDIAYK		1	1	P15924	P15924	Desmoplakin OS=Homo sapiens OX=9606 GN=DSP PE=1 SV=3	0	2	2	0.2756	0	1	1	1	459.768	918.529	918.529	-0.76	-0.00035	0	0	428129	HCD	MS2	15.709	50	79.2661	24684	24684	24682	0/0		2.25	440	0.0007241	0.0242	0.248
1904247_Proteos_005.RAW	AF-M	Artificial Fingerprint	High	Sequest HT	Sequest HT (A2)	A	2	Unambiguous	LDSELKNMQDMVEDYR	LDSELKNmQDMVEDYR	M8(Oxidation)	1	1	P04264	P04264	Keratin, type II cytoskeletal 1 OS=Homo sapiens OX=9606 GN=KRT1 PE=1 SV=6	1	3	3	0.3765	0	1	1	1	667.968	2001.89	2001.89	0.05	3e-05	0	0	336640	HCD	MS2	1.51534	50	79.2804	24688	24688	24687	0/0		2.55	5168	0.0007241	0.0081	0.412
1904247_Proteos_005.RAW	AF-M	Artificial Fingerprint	High	Sequest HT	Sequest HT (A2)	A	2	Unambiguous	MTLDDFR	mTLDDFR	M1(Oxidation)	1	1	P35527	P35527	Keratin, type I cytoskeletal 9 OS=Homo sapiens OX=9606 GN=KRT9 PE=1 SV=3	0	2	2	0.1019	0	1	1	1	457.208	913.408	913.408	-0.49	-0.00022	0	0	180943	HCD	MS2	52.9892	50	79.3108	24697	24697	24696	0/0		1.08	999	0.002625	0.05517	0.122
1904247_Proteos_005.RAW	AF-M	Artificial Fingerprint	High	Sequest HT	Sequest HT (A2)	A	2	Unambiguous	KNHKEEMSQLTGQNSGDVNVEINVAPGK	KNHKEEMSQLTGQNSGDVNVEINVAPGK		1	1	P35527	P35527	Keratin, type I cytoskeletal 9 OS=Homo sapiens OX=9606 GN=KRT9 PE=1 SV=3	2	4	4	0.1458	0	1	1	1	756.626	3023.48	3023.49	-0.67	-0.00051	0	0	82840.4	HCD	MS2	1.53186	50	79.3188	24700	24700	24699	0/0		1.92	7748	0.001797	0.04511	0.153
1904247_Proteos_005.RAW	AF-M	Artificial Fingerprint	High	Sequest HT	Sequest HT (A2)	A	2	Unambiguous	NHKEEMSQLTGQNSGDVNVEINVAPGK	NHKEEmSQLTGQnSGDVNVEINVAPGK	M6(Oxidation); N13(Deamidated)	1	1	P35527	P35527	Keratin, type I cytoskeletal 9 OS=Homo sapiens OX=9606 GN=KRT9 PE=1 SV=3	1	4	4	0.0236	0	1	1	1	728.848	2912.37	2912.37	0.5	0.00036	0	0	246648	HCD	MS2	4.71916	50	79.4297	24728	24728	24727	0/0		2.96	10317	0.002625	0.05365	0.127
1904247_Proteos_005.RAW	AF-M	Artificial Fingerprint	High	Sequest HT	Sequest HT (A2)	A	2	Unambiguous	NHKEEMSQLTGQNSGDVNVEINVAPGK	NHKEEmSQLTGqNSGDVNVEINVAPGK	M6(Oxidation); Q12(Deamidated)	1	1	P35527	P35527	Keratin, type I cytoskeletal 9 OS=Homo sapiens OX=9606 GN=KRT9 PE=1 SV=3	1	4	4		0.0236	2	2	2	728.848	2912.37	2912.37	0.5	0.00036	0	0	246648	HCD	MS2	4.71916	50	79.4297	24728	24728	24727	0/0		2.89	10317	0.002625	0.05574	0.121
1904247_Proteos_005.RAW	AF-M	Artificial Fingerprint	High	Sequest HT	Sequest HT (A2)	A	2	Unambiguous	MTLDDFR	MTLDDFR		1	1	P35527	P35527	Keratin, type I cytoskeletal 9 OS=Homo sapiens OX=9606 GN=KRT9 PE=1 SV=3	0	2	2	0.5433	0	1	1	1	449.21	897.413	897.413	-0.59	-0.00026	0	0	3.81154e+06	HCD	MS2	4.70486	21.586	79.5791	24765	24765	24764	0/0		2.08	835	0.004031	0.07344	0.078
1904247_Proteos_005.RAW	AF-M	Artificial Fingerprint	High	Sequest HT	Sequest HT (A2)	A	2	Unambiguous	QGVDADINGLR	QGVDADInGLR	N8(Deamidated)	1	1	P35527	P35527	Keratin, type I cytoskeletal 9 OS=Homo sapiens OX=9606 GN=KRT9 PE=1 SV=3	0	2	2	0.4685	0	1	1	1	579.791	1158.57	1158.57	-0.16	-9e-05	0	0	445729	HCD	MS2	1.70144	50	79.7179	24809	24809	24808	0/0		2.86	1263	0	0.00221	0.608
1904247_Proteos_005.RAW	AF-M	Artificial Fingerprint	High	Sequest HT	Sequest HT (A2)	A	2	Unambiguous	TNAENEFVTIK	TnAENEFVTIK	N2(Deamidated)	1	1	P04264	P04264	Keratin, type II cytoskeletal 1 OS=Homo sapiens OX=9606 GN=KRT1 PE=1 SV=6	0	2	2	0.0405	0	1	1	1	633.814	1266.62	1266.62	-0.74	-0.00047	0	0	194526	HCD	MS2	22.0964	50	79.7286	24814	24814	24813	0/0		1.73	1539	0.0007241	0.0237	0.251
1904247_Proteos_005.RAW	AF-M	Artificial Fingerprint	High	Sequest HT	Sequest HT (A2)	A	2	Unambiguous	TNAENEFVTIK	TNAEnEFVTIK	N5(Deamidated)	1	1	P04264	P04264	Keratin, type II cytoskeletal 1 OS=Homo sapiens OX=9606 GN=KRT1 PE=1 SV=6	0	2	2		0.0405	2	2	2	633.814	1266.62	1266.62	-0.74	-0.00047	0	0	194526	HCD	MS2	22.0964	50	79.7286	24814	24814	24813	0/0		1.66	1539	0.001797	0.04095	0.168
[truncated: 3,677 more rows]

## Sheet: peptides
filename	SampleNumber	SampleType	confidence	psm_ambiguity	peptide_seq	modifications	modifications_all_possible_sites	qvality_pep	qvality_qvalue	svm_score	protein_grp_cnt	protein_cnt	psm_cnt	protein_id_master	protein_id	missed_cleavages	peptide_mass_MH	peptide_len	sequest_xcorr	sequest_confidence	charge	delta_score	deltaCn	sequest_rank	sequest_search_engine_rank	sequest_concatenated_rank	precursor_mz	mass_error_ppm	mass_error_mz	retention_time_min	percolator_qvalue	percolator_pep
[truncated: 1,741 more rows]

[truncated: 2 more sheets: proteins, protein_groups]
